# Supplementary material for: One-pot synthesis of functionalized benzo[c]coumarins and their precursors via the reaction of 2-(polyfluoroalkyl)chromones with 4-alkyl-3-cyanocoumarins
Source: Royal Society of Chemistry journal article supplement (doi:10.1039/c6ra12492e), 2016-01-01

## Supporting Information

### **One-pot synthesis of functionalized benzo[c]coumarins and their precursors via the reaction of 2-(polyfluoroalkyl)chromones with 4-alkyl-3-cyanocoumarins**

Vyacheslav Ya. Sosnovskikh,\* Vladislav Yu. Korotaev, Igor B. Kutyashev,  
Alexey Yu. Barkov, Alexander V. Safrygin

*Department of Chemistry, Institute of Natural Sciences, Ural Federal University, 620000 Ekaterinburg, Russian Federation*

## <sup>1</sup>H, <sup>19</sup>F, and <sup>13</sup>C NMR spectra of new compounds

|                                                                                      |     |
|--------------------------------------------------------------------------------------|-----|
| 1. Copy of <sup>1</sup> H NMR spectrum of <b>2d</b> in CDCl <sub>3</sub>             | S6  |
| 2. Copy of <sup>13</sup> C NMR spectrum of <b>2d</b> in CDCl <sub>3</sub>            | S7  |
| 3. Copy of <sup>1</sup> H NMR spectrum of <b>3e</b> in DMSO- <i>d</i> <sub>6</sub>   | S8  |
| 4. Copy of <sup>13</sup> C NMR spectrum of <b>3e</b> in DMSO- <i>d</i> <sub>6</sub>  | S9  |
| 5. Copy of <sup>19</sup> F NMR spectrum of <b>3e</b> in DMSO- <i>d</i> <sub>6</sub>  | S10 |
| 6. Copy of <sup>1</sup> H NMR spectrum of <b>3f</b> in DMSO- <i>d</i> <sub>6</sub>   | S11 |
| 7. Copy of <sup>13</sup> C NMR spectrum of <b>3f</b> in DMSO- <i>d</i> <sub>6</sub>  | S12 |
| 8. Copy of <sup>19</sup> F NMR spectrum of <b>3f</b> in DMSO- <i>d</i> <sub>6</sub>  | S13 |
| 9. Copy of <sup>1</sup> H NMR spectrum of <b>3g</b> in CDCl <sub>3</sub>             | S14 |
| 10. Copy of <sup>13</sup> C NMR spectrum of <b>3g</b> in CDCl <sub>3</sub>           | S15 |
| 11. Copy of <sup>19</sup> F NMR spectrum of <b>3g</b> in CDCl <sub>3</sub>           | S16 |
| 12. Copy of <sup>1</sup> H NMR spectrum of <b>3h</b> in CDCl <sub>3</sub>            | S17 |
| 13. Copy of <sup>13</sup> C NMR spectrum of <b>3h</b> in CDCl <sub>3</sub>           | S18 |
| 14. Copy of <sup>19</sup> F NMR spectrum of <b>3h</b> in CDCl <sub>3</sub>           | S19 |
| 15. Copy of <sup>1</sup> H NMR spectrum of <b>3i</b> in CDCl <sub>3</sub>            | S20 |
| 16. Copy of <sup>13</sup> C NMR spectrum of <b>3i</b> in CDCl <sub>3</sub>           | S21 |
| 17. Copy of <sup>19</sup> F NMR spectrum of <b>3i</b> in CDCl <sub>3</sub>           | S22 |
| 18. Copy of <sup>1</sup> H NMR spectrum of <b>3j</b> in CDCl <sub>3</sub>            | S23 |
| 19. Copy of <sup>13</sup> C NMR spectrum of <b>3j</b> in CDCl <sub>3</sub>           | S24 |
| 20. Copy of <sup>19</sup> F NMR spectrum of <b>3j</b> in CDCl <sub>3</sub>           | S25 |
| 21. Copy of <sup>1</sup> H NMR spectrum of <b>3k</b> in CDCl <sub>3</sub>            | S26 |
| 22. Copy of <sup>1</sup> H NMR spectrum of <b>3k</b> in DMSO- <i>d</i> <sub>6</sub>  | S27 |
| 23. Copy of <sup>13</sup> C NMR spectrum of <b>3k</b> in DMSO- <i>d</i> <sub>6</sub> | S28 |
| 24. Copy of <sup>19</sup> F NMR spectrum of <b>3k</b> in CDCl <sub>3</sub>           | S29 |
| 25. Copy of <sup>19</sup> F NMR spectrum of <b>3k</b> in DMSO- <i>d</i> <sub>6</sub> | S30 |
| 26. Copy of <sup>1</sup> H NMR spectrum of <b>3l</b> in CDCl <sub>3</sub>            | S31 |
| 27. Copy of <sup>13</sup> C NMR spectrum of <b>3l</b> in CDCl <sub>3</sub>           | S32 |
| 28. Copy of <sup>13</sup> C NMR spectrum of <b>3l</b> in DMSO- <i>d</i> <sub>6</sub> | S33 |
| 29. Copy of <sup>19</sup> F NMR spectrum of <b>3l</b> in CDCl <sub>3</sub>           | S34 |
| 30. Copy of <sup>1</sup> H NMR spectrum of <b>3m</b> in DMSO- <i>d</i> <sub>6</sub>  | S35 |
| 31. Copy of <sup>13</sup> C NMR spectrum of <b>3m</b> in DMSO- <i>d</i> <sub>6</sub> | S36 |
| 32. Copy of <sup>19</sup> F NMR spectrum of <b>3m</b> in DMSO- <i>d</i> <sub>6</sub> | S37 |

|                                                                            |     |
|----------------------------------------------------------------------------|-----|
| 33. Copy of $^1\text{H}$ NMR spectrum of <b>3n</b> in $\text{DMSO-}d_6$    | S38 |
| 34. Copy of $^{13}\text{C}$ NMR spectrum of <b>3n</b> in $\text{DMSO-}d_6$ | S39 |
| 35. Copy of $^{19}\text{F}$ NMR spectrum of <b>3n</b> in $\text{DMSO-}d_6$ | S40 |
| 36. Copy of $^1\text{H}$ NMR spectrum of <b>3o</b> in $\text{DMSO-}d_6$    | S41 |
| 37. Copy of $^{13}\text{C}$ NMR spectrum of <b>3o</b> in $\text{DMSO-}d_6$ | S42 |
| 38. Copy of $^{19}\text{F}$ NMR spectrum of <b>3o</b> in $\text{DMSO-}d_6$ | S43 |
| 39. Copy of $^1\text{H}$ NMR spectrum of <b>3p</b> in $\text{CDCl}_3$      | S44 |
| 40. Copy of $^1\text{H}$ NMR spectrum of <b>3p</b> in $\text{DMSO-}d_6$    | S45 |
| 41. Copy of $^{13}\text{C}$ NMR spectrum of <b>3p</b> in $\text{DMSO-}d_6$ | S46 |
| 42. Copy of $^{19}\text{F}$ NMR spectrum of <b>3p</b> in $\text{CDCl}_3$   | S47 |
| 43. Copy of $^1\text{H}$ NMR spectrum of <b>3q</b> in $\text{CDCl}_3$      | S48 |
| 44. Copy of $^1\text{H}$ NMR spectrum of <b>3q</b> in $\text{DMSO-}d_6$    | S49 |
| 45. Copy of $^{13}\text{C}$ NMR spectrum of <b>3q</b> in $\text{CDCl}_3$   | S50 |
| 46. Copy of $^{19}\text{F}$ NMR spectrum of <b>3q</b> in $\text{CDCl}_3$   | S51 |
| 47. Copy of $^{19}\text{F}$ NMR spectrum of <b>3q</b> in $\text{DMSO-}d_6$ | S52 |
| 48. Copy of $^1\text{H}$ NMR spectrum of <b>3r</b> in $\text{DMSO-}d_6$    | S53 |
| 49. Copy of $^1\text{H}$ NMR spectrum of <b>3s</b> in $\text{CDCl}_3$      | S54 |
| 50. Copy of $^{19}\text{F}$ NMR spectrum of <b>3s</b> in $\text{CDCl}_3$   | S55 |
| 51. Copy of $^1\text{H}$ NMR spectrum of <b>4a</b> in $\text{DMSO-}d_6$    | S56 |
| 52. Copy of $^{13}\text{C}$ NMR spectrum of <b>4a</b> in $\text{DMSO-}d_6$ | S57 |
| 53. Copy of $^{19}\text{F}$ NMR spectrum of <b>4a</b> in $\text{DMSO-}d_6$ | S58 |
| 54. Copy of $^1\text{H}$ NMR spectrum of <b>4b</b> in $\text{DMSO-}d_6$    | S59 |
| 55. Copy of $^{13}\text{C}$ NMR spectrum of <b>4b</b> in $\text{DMSO-}d_6$ | S60 |
| 56. Copy of $^{19}\text{F}$ NMR spectrum of <b>4b</b> in $\text{DMSO-}d_6$ | S61 |
| 57. Copy of $^1\text{H}$ NMR spectrum of <b>4c</b> in $\text{DMSO-}d_6$    | S62 |
| 58. Copy of $^{13}\text{C}$ NMR spectrum of <b>4c</b> in $\text{DMSO-}d_6$ | S63 |
| 59. Copy of $^{19}\text{F}$ NMR spectrum of <b>4c</b> in $\text{DMSO-}d_6$ | S64 |
| 60. Copy of $^1\text{H}$ NMR spectrum of <b>4d</b> in $\text{CDCl}_3$      | S65 |
| 61. Copy of $^1\text{H}$ NMR spectrum of <b>4d</b> in $\text{DMSO-}d_6$    | S66 |
| 62. Copy of $^{13}\text{C}$ NMR spectrum of <b>4d</b> in $\text{DMSO-}d_6$ | S67 |
| 63. Copy of $^{19}\text{F}$ NMR spectrum of <b>4d</b> in $\text{CDCl}_3$   | S68 |
| 64. Copy of $^{19}\text{F}$ NMR spectrum of <b>4d</b> in $\text{DMSO-}d_6$ | S69 |
| 65. Copy of $^1\text{H}$ NMR spectrum of <b>4e</b> in $\text{DMSO-}d_6$    | S70 |
| 66. Copy of $^{13}\text{C}$ NMR spectrum of <b>4e</b> in $\text{DMSO-}d_6$ | S71 |
| 67. Copy of $^{19}\text{F}$ NMR spectrum of <b>4e</b> in $\text{DMSO-}d_6$ | S72 |
| 68. Copy of $^1\text{H}$ NMR spectrum of <b>4f</b> in $\text{DMSO-}d_6$    | S73 |

|                                                                             |      |
|-----------------------------------------------------------------------------|------|
| 69. Copy of $^{13}\text{C}$ NMR spectrum of <b>4f</b> in $\text{DMSO-}d_6$  | S74  |
| 70. Copy of $^{19}\text{F}$ NMR spectrum of <b>4f</b> in $\text{DMSO-}d_6$  | S75  |
| 71. Copy of $^1\text{H}$ NMR spectrum of <b>4g</b> in $\text{DMSO-}d_6$     | S76  |
| 72. Copy of $^{13}\text{C}$ NMR spectrum of <b>4g</b> in $\text{DMSO-}d_6$  | S77  |
| 73. Copy of $^{19}\text{F}$ NMR spectrum of <b>4g</b> in $\text{DMSO-}d_6$  | S78  |
| 74. Copy of $^1\text{H}$ NMR spectrum of <b>4h</b> in $\text{DMSO-}d_6$     | S79  |
| 75. Copy of $^{13}\text{C}$ NMR spectrum of <b>4h</b> in $\text{DMSO-}d_6$  | S80  |
| 76. Copy of $^{19}\text{F}$ NMR spectrum of <b>4h</b> in $\text{DMSO-}d_6$  | S81  |
| 77. Copy of $^1\text{H}$ NMR spectrum of <b>4i</b> in $\text{DMSO-}d_6$     | S82  |
| 78. Copy of $^{13}\text{C}$ NMR spectrum of <b>4i</b> in $\text{DMSO-}d_6$  | S83  |
| 79. Copy of $^{19}\text{F}$ NMR spectrum of <b>4i</b> in $\text{DMSO-}d_6$  | S84  |
| 80. Copy of $^1\text{H}$ NMR spectrum of <b>4j</b> in $\text{DMSO-}d_6$     | S85  |
| 81. Copy of $^{13}\text{C}$ NMR spectrum of <b>4j</b> in $\text{DMSO-}d_6$  | S86  |
| 82. Copy of $^{19}\text{F}$ NMR spectrum of <b>4j</b> in $\text{DMSO-}d_6$  | S87  |
| 83. Copy of $^1\text{H}$ NMR spectrum of <b>4k</b> in $\text{DMSO-}d_6$     | S88  |
| 84. Copy of $^{13}\text{C}$ NMR spectrum of <b>4k</b> in $\text{DMSO-}d_6$  | S89  |
| 85. Copy of $^{19}\text{F}$ NMR spectrum of <b>4k</b> in $\text{DMSO-}d_6$  | S90  |
| 86. Copy of $^1\text{H}$ NMR spectrum of <b>4l</b> in $\text{DMSO-}d_6$     | S91  |
| 87. Copy of $^{13}\text{C}$ NMR spectrum of <b>4l</b> in $\text{DMSO-}d_6$  | S92  |
| 88. Copy of $^{19}\text{F}$ NMR spectrum of <b>4l</b> in $\text{DMSO-}d_6$  | S93  |
| 89. Copy of $^1\text{H}$ NMR spectrum of <b>4m</b> in $\text{DMSO-}d_6$     | S94  |
| 90. Copy of $^{19}\text{F}$ NMR spectrum of <b>4m</b> in $\text{DMSO-}d_6$  | S95  |
| 91. Copy of $^1\text{H}$ NMR spectrum of <b>4n</b> in $\text{DMSO-}d_6$     | S96  |
| 92. Copy of $^{13}\text{C}$ NMR spectrum of <b>4n</b> in $\text{DMSO-}d_6$  | S97  |
| 93. Copy of $^{19}\text{F}$ NMR spectrum of <b>4n</b> in $\text{DMSO-}d_6$  | S98  |
| 94. Copy of $^1\text{H}$ NMR spectrum of <b>4o</b> in $\text{DMSO-}d_6$     | S99  |
| 95. Copy of $^{13}\text{C}$ NMR spectrum of <b>4o</b> in $\text{DMSO-}d_6$  | S100 |
| 96. Copy of $^{19}\text{F}$ NMR spectrum of <b>4o</b> in $\text{DMSO-}d_6$  | S101 |
| 97. Copy of $^1\text{H}$ NMR spectrum of <b>4p</b> in $\text{DMSO-}d_6$     | S102 |
| 98. Copy of $^{13}\text{C}$ NMR spectrum of <b>4p</b> in $\text{DMSO-}d_6$  | S103 |
| 99. Copy of $^{19}\text{F}$ NMR spectrum of <b>4p</b> in $\text{DMSO-}d_6$  | S104 |
| 100. Copy of $^1\text{H}$ NMR spectrum of <b>4q</b> in $\text{DMSO-}d_6$    | S105 |
| 101. Copy of $^{13}\text{C}$ NMR spectrum of <b>4q</b> in $\text{DMSO-}d_6$ | S106 |
| 102. Copy of $^{19}\text{F}$ NMR spectrum of <b>4q</b> in $\text{DMSO-}d_6$ | S107 |
| 103. Copy of $^1\text{H}$ NMR spectrum of <b>4r</b> in $\text{DMSO-}d_6$    | S108 |
| 104. Copy of $^1\text{H}$ NMR spectrum of <b>4s</b> in $\text{DMSO-}d_6$    | S109 |

|                                                                             |      |
|-----------------------------------------------------------------------------|------|
| 105. Copy of $^{13}\text{C}$ NMR spectrum of <b>4s</b> in $\text{DMSO-}d_6$ | S110 |
| 106. Copy of $^{19}\text{F}$ NMR spectrum of <b>4s</b> in $\text{DMSO-}d_6$ | S111 |
| 107. Copy of $^1\text{H}$ NMR spectrum of <b>4t</b> in $\text{DMSO-}d_6$    | S112 |
| 108. Copy of $^{13}\text{C}$ NMR spectrum of <b>4t</b> in $\text{DMSO-}d_6$ | S113 |
| 109. Copy of $^{19}\text{F}$ NMR spectrum of <b>4t</b> in $\text{DMSO-}d_6$ | S114 |
| 110. Copy of $^1\text{H}$ NMR spectrum of <b>4u</b> in $\text{CDCl}_3$      | S115 |
| 111. Copy of $^1\text{H}$ NMR spectrum of <b>4u</b> in $\text{DMSO-}d_6$    | S116 |
| 112. Copy of $^{13}\text{C}$ NMR spectrum of <b>4u</b> in $\text{CDCl}_3$   | S117 |
| 113. Copy of $^{19}\text{F}$ NMR spectrum of <b>4u</b> in $\text{CDCl}_3$   | S118 |
| 114. Copy of $^1\text{H}$ NMR spectrum of <b>5k</b> in $\text{CDCl}_3$      | S119 |
| 115. Copy of $^{13}\text{C}$ NMR spectrum of <b>5k</b> in $\text{CDCl}_3$   | S120 |
| 116. Copy of $^1\text{H}$ NMR spectrum of <b>5l</b> in $\text{CDCl}_3$      | S121 |
| 117. Copy of $^{13}\text{C}$ NMR spectrum of <b>5l</b> in $\text{CDCl}_3$   | S122 |
| 118. Copy of $^1\text{H}$ NMR spectrum of <b>5m</b> in $\text{CDCl}_3$      | S123 |
| 119. Copy of $^{13}\text{C}$ NMR spectrum of <b>5m</b> in $\text{CDCl}_3$   | S124 |
| 120. Copy of $^1\text{H}$ NMR spectrum of <b>5n</b> in $\text{CDCl}_3$      | S125 |
| 121. Copy of $^1\text{H}$ NMR spectrum of <b>5n</b> in $\text{DMSO-}d_6$    | S126 |
| 122. Copy of $^{13}\text{C}$ NMR spectrum of <b>5n</b> in $\text{CDCl}_3$   | S127 |
| 123. Copy of $^1\text{H}$ NMR spectrum of <b>5o</b> in $\text{CDCl}_3$      | S128 |
| 124. Copy of $^1\text{H}$ NMR spectrum of <b>6k</b> in $\text{DMSO-}d_6$    | S129 |
| 125. Copy of $^1\text{H}$ NMR spectrum of <b>6l</b> in $\text{CDCl}_3$      | S130 |
| 126. Copy of $^1\text{H}$ NMR spectrum of <b>6l</b> in $\text{DMSO-}d_6$    | S131 |
| 127. Copy of $^{13}\text{C}$ NMR spectrum of <b>6l</b> in $\text{DMSO-}d_6$ | S132 |
| 128. Copy of $^1\text{H}$ NMR spectrum of <b>6m</b> in $\text{DMSO-}d_6$    | S133 |
| 129. Copy of $^1\text{H}$ NMR spectrum of <b>6n</b> in $\text{DMSO-}d_6$    | S134 |
| 130. Copy of $^{13}\text{C}$ NMR spectrum of <b>6n</b> in $\text{DMSO-}d_6$ | S135 |
| 131. Copy of $^1\text{H}$ NMR spectrum of <b>6o</b> in $\text{DMSO-}d_6$    | S136 |
| 132. Copy of $^1\text{H}$ NMR spectrum of <b>7k</b> in $\text{CDCl}_3$      | S137 |
| 133. Copy of $^1\text{H}$ NMR spectrum of <b>7k</b> in $\text{DMSO-}d_6$    | S138 |
| 134. Copy of $^{13}\text{C}$ NMR spectrum of <b>7k</b> in $\text{DMSO-}d_6$ | S139 |
| 135. Copy of $^1\text{H}$ NMR spectrum of <b>7l</b> in $\text{DMSO-}d_6$    | S140 |

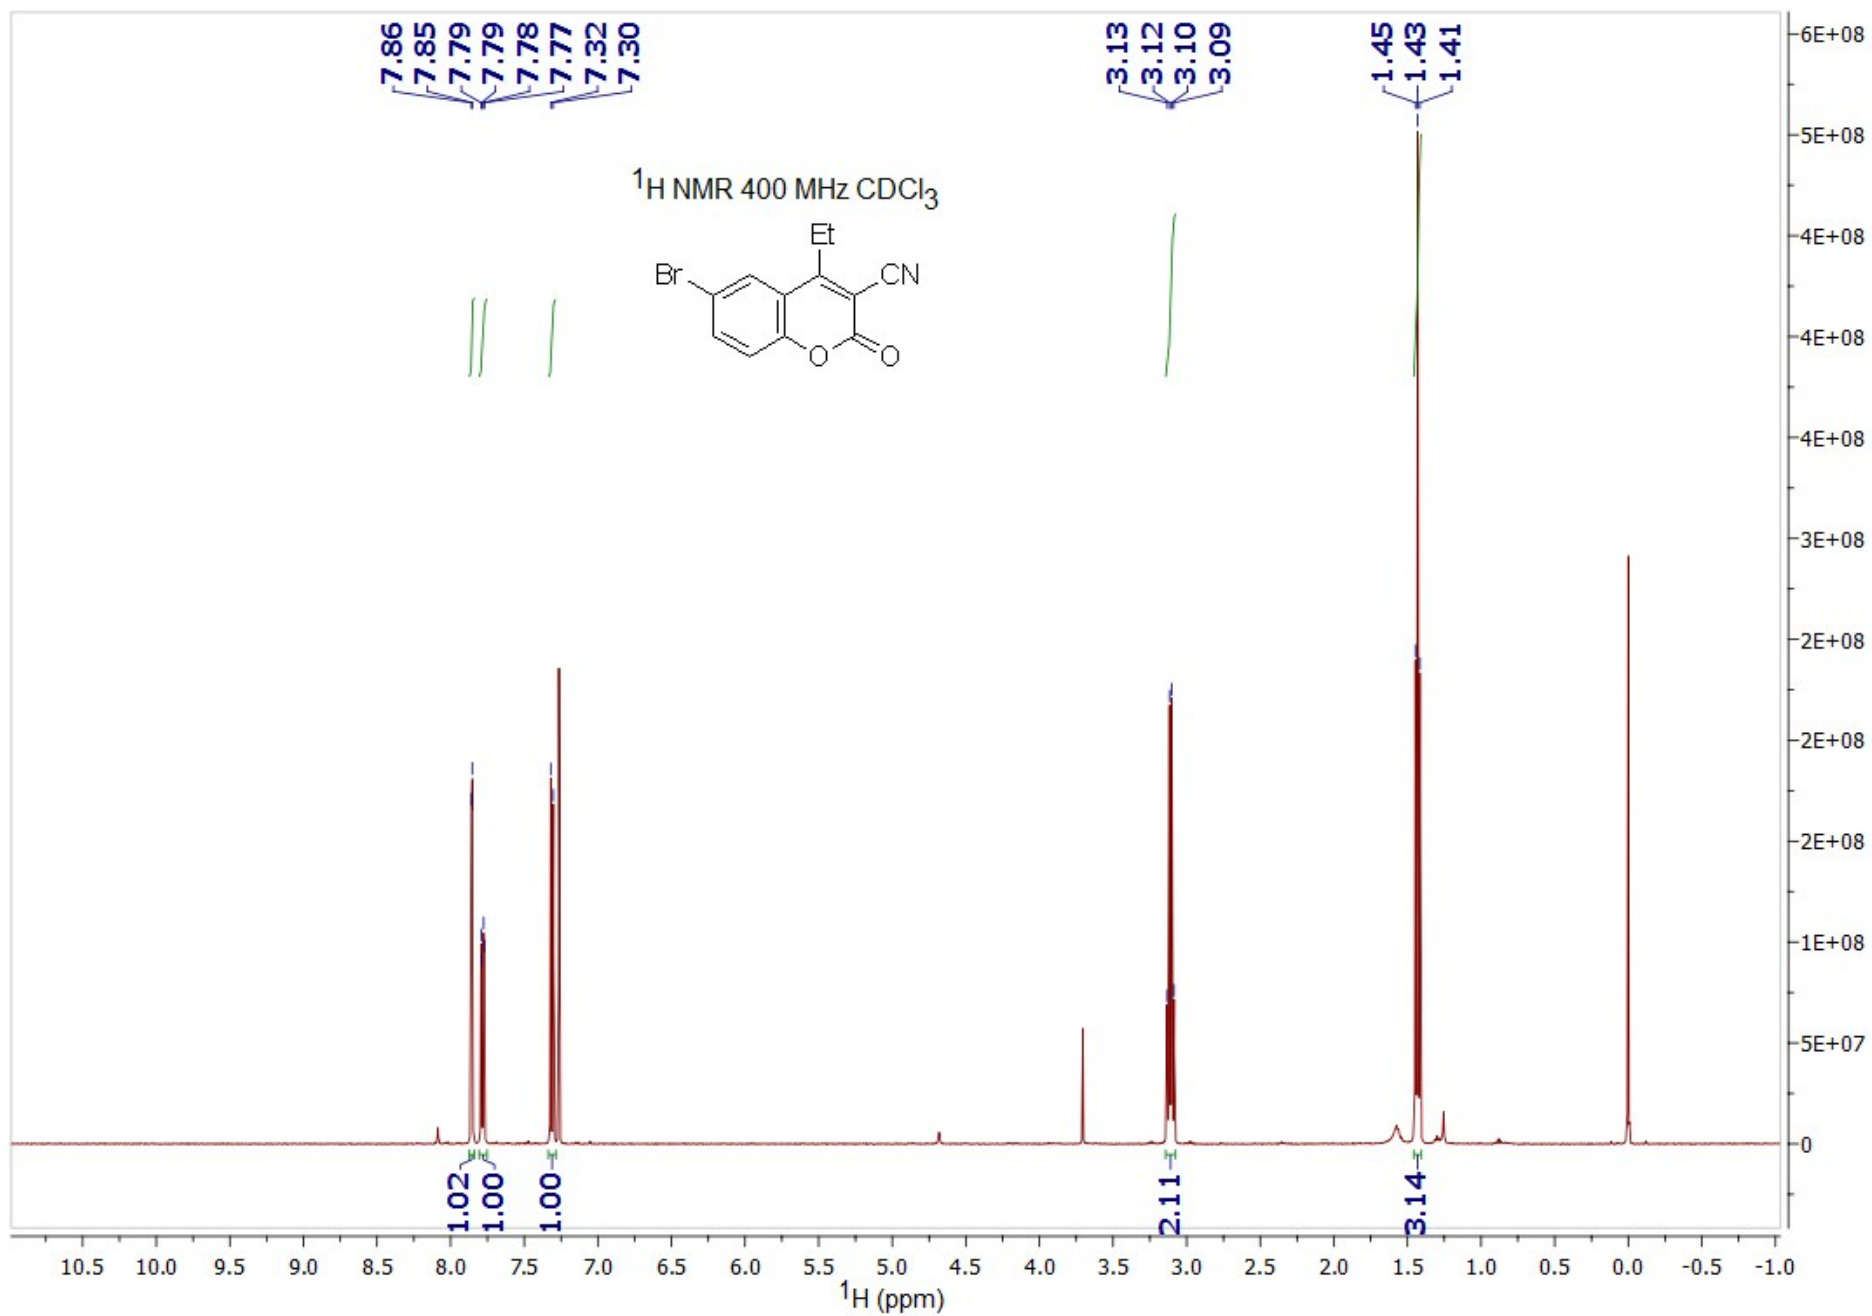

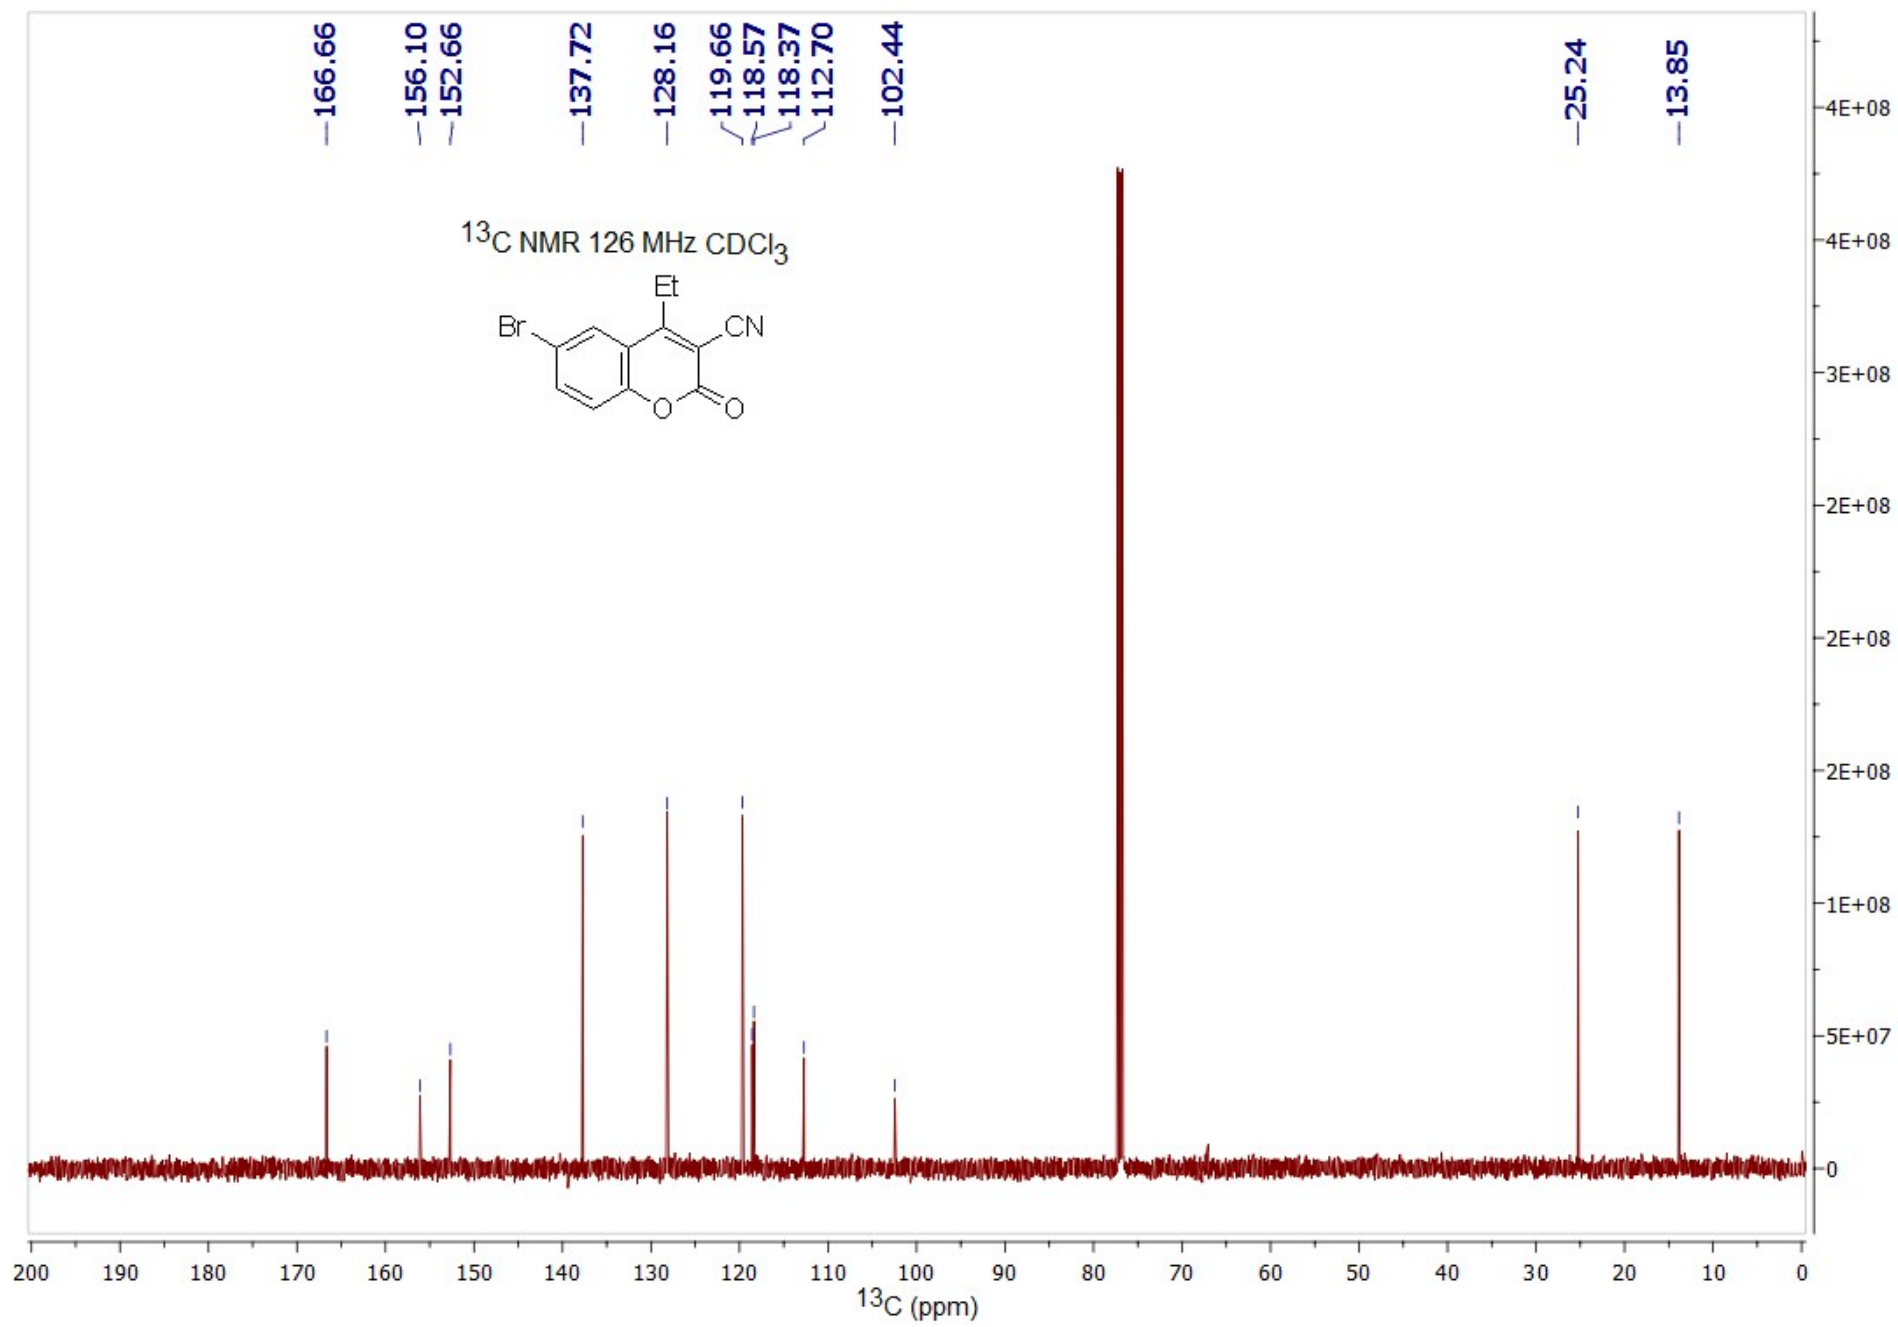

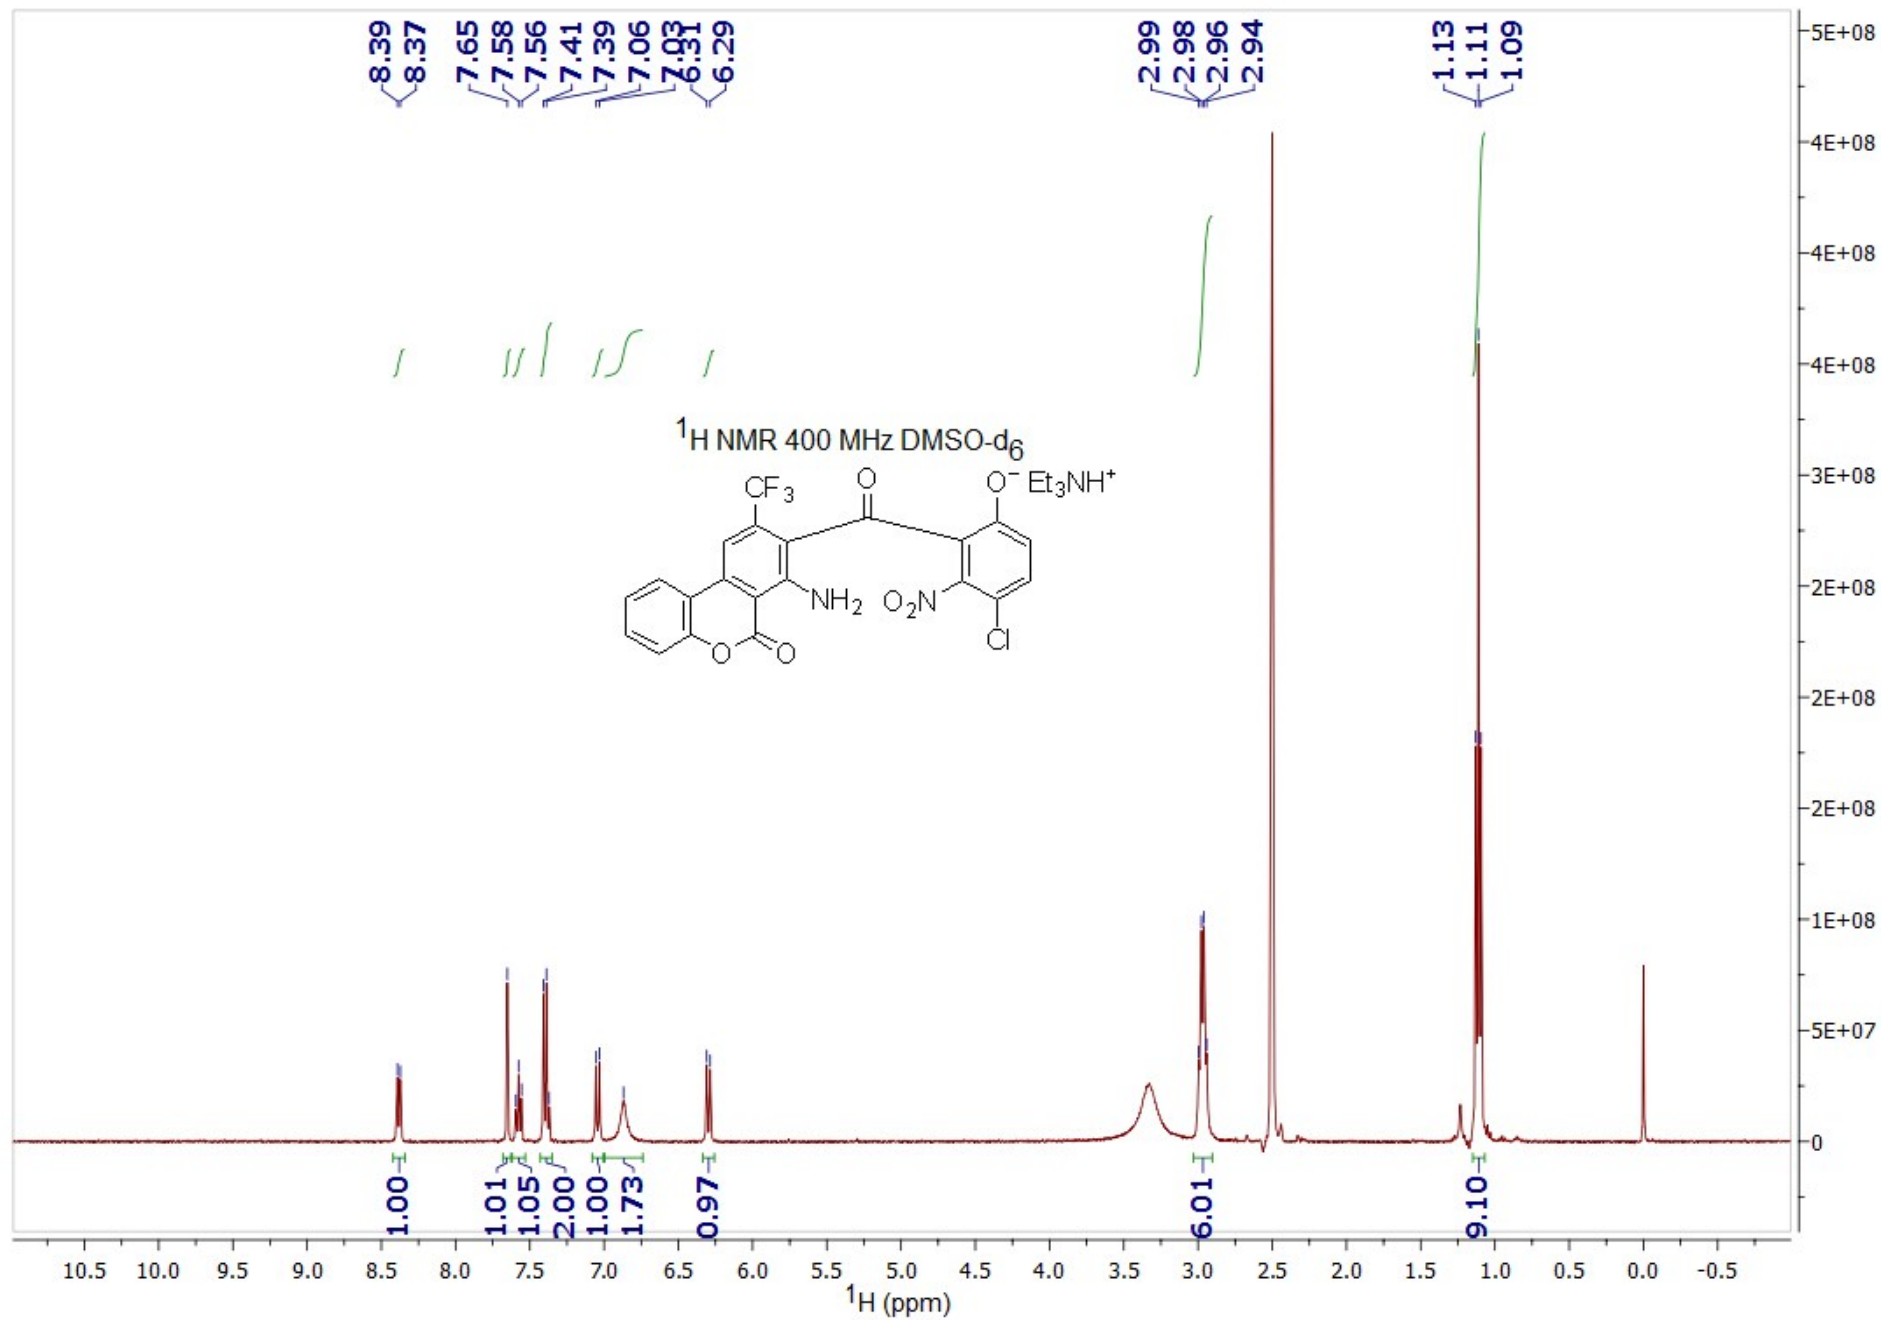



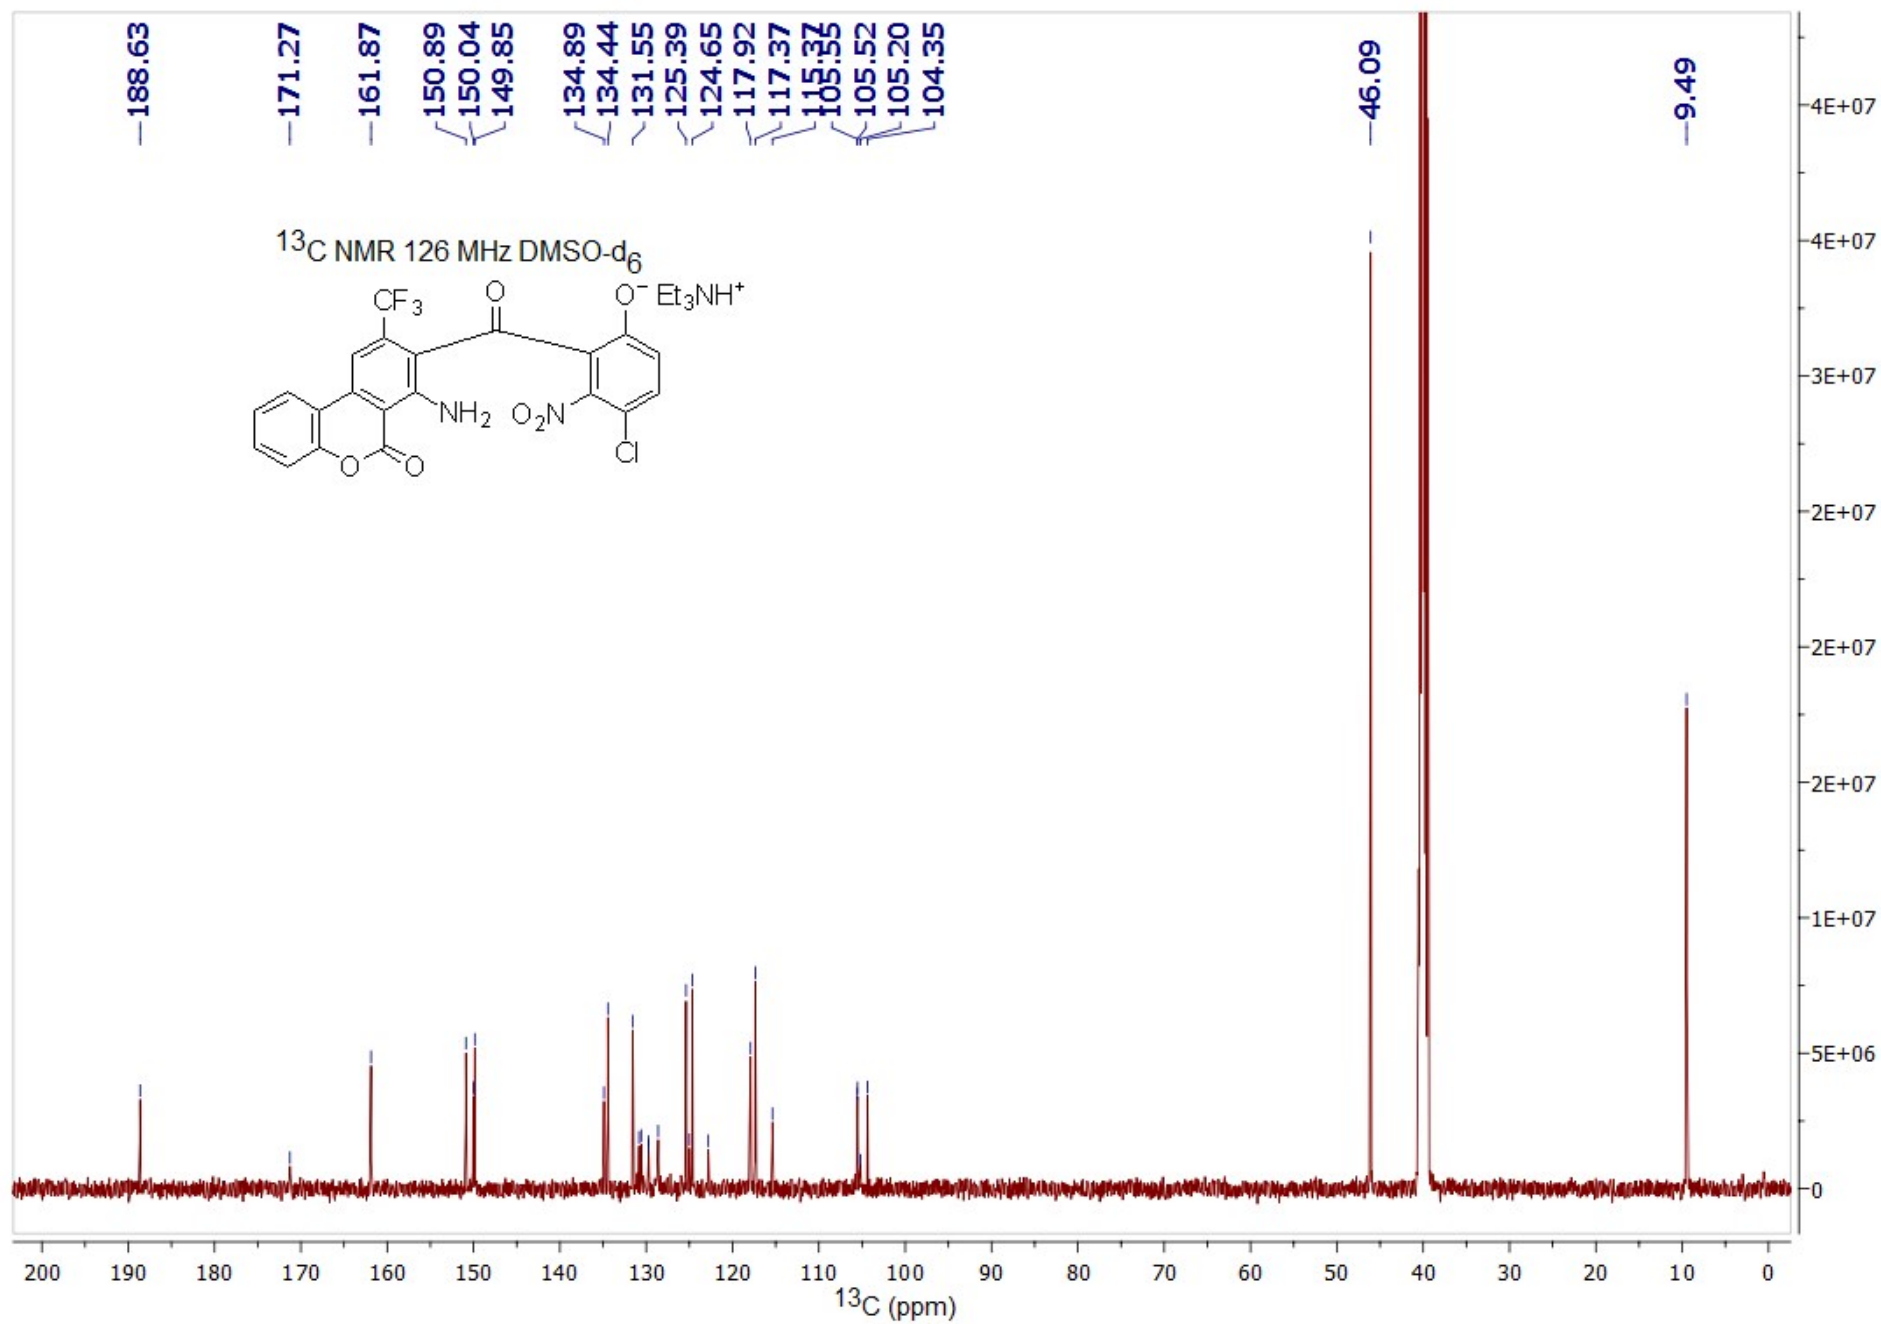

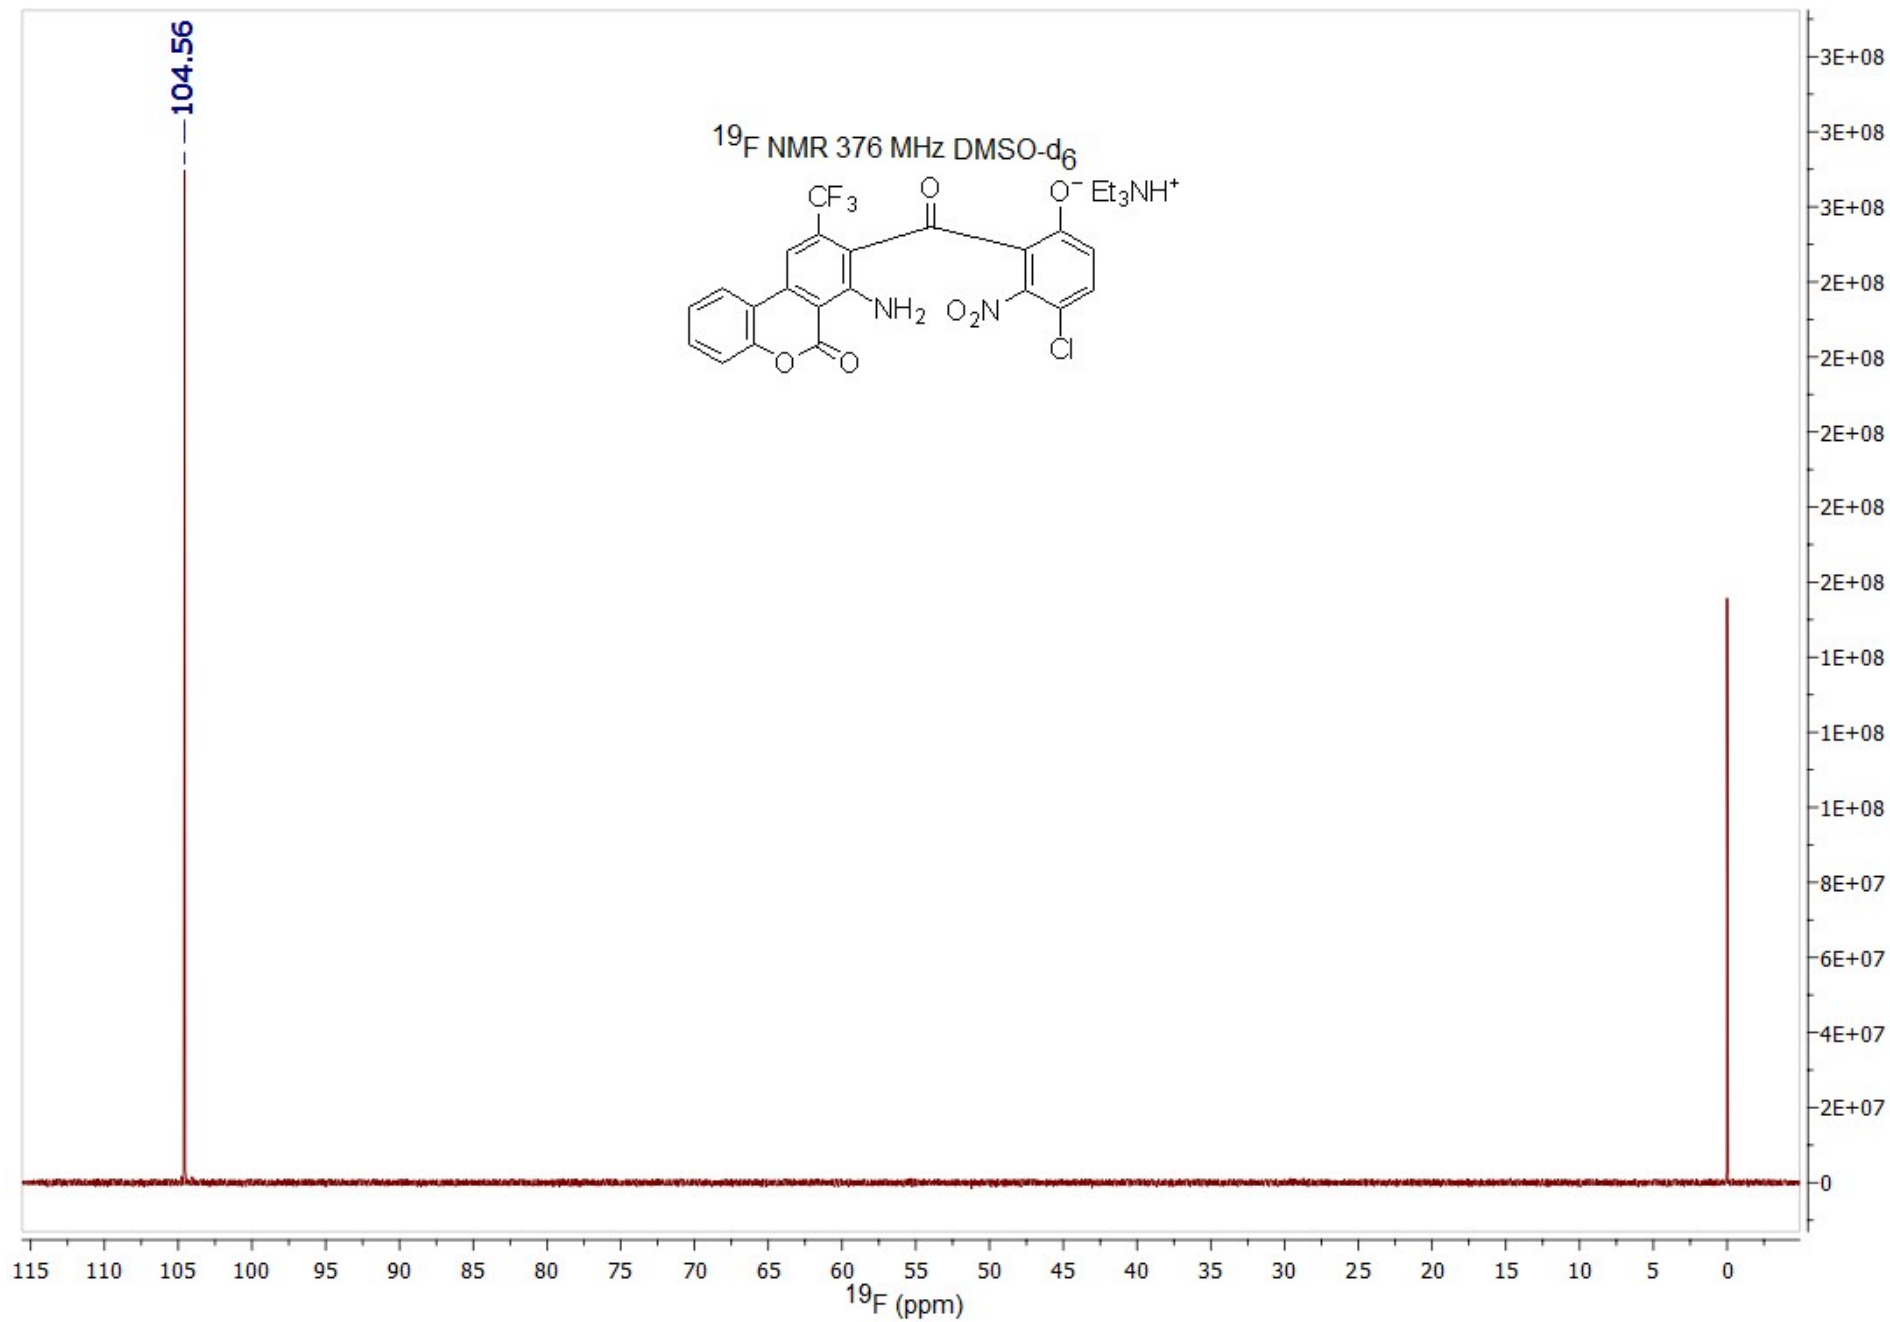

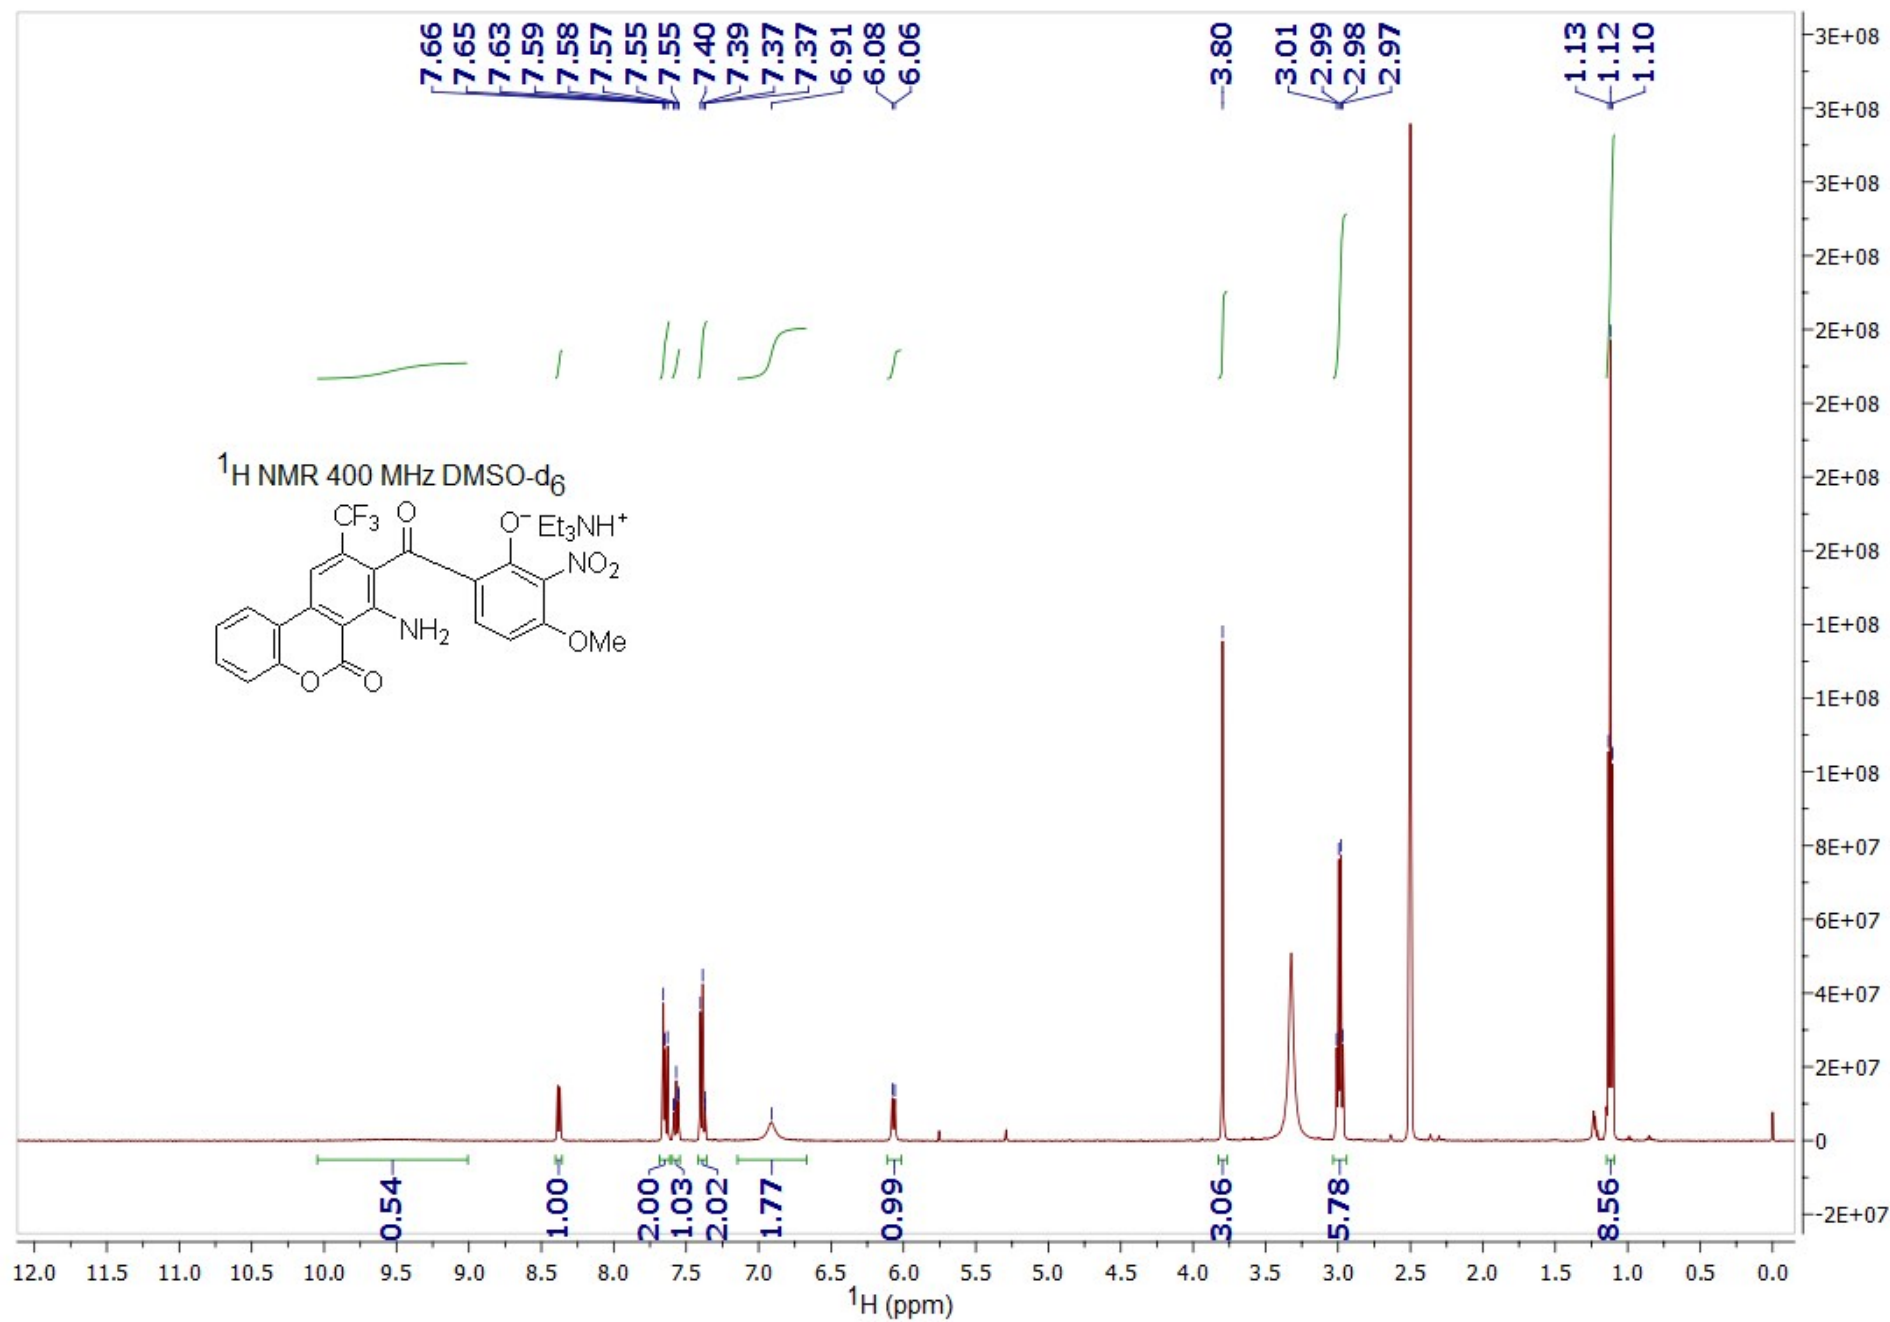

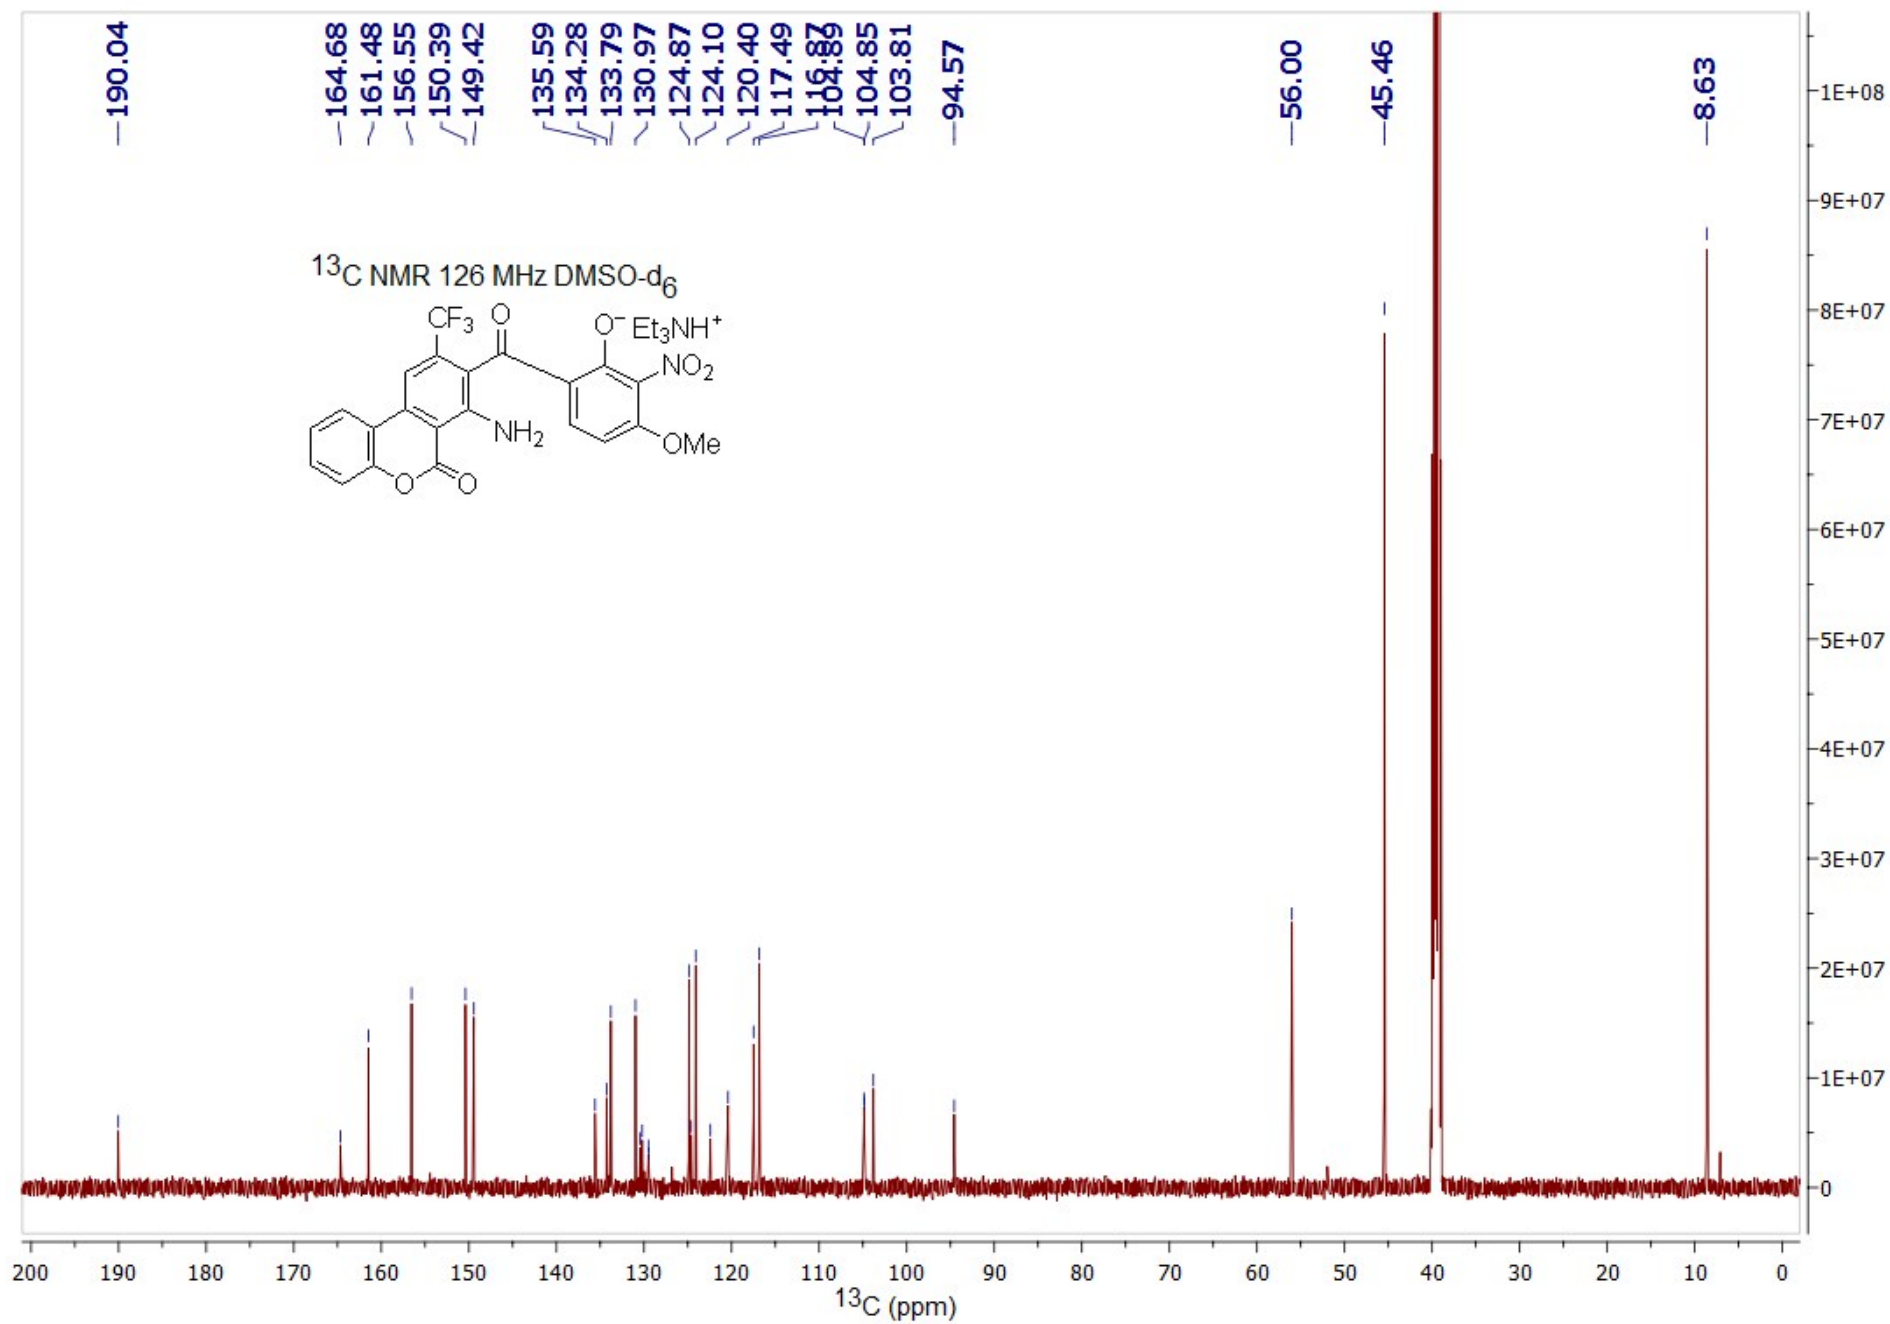

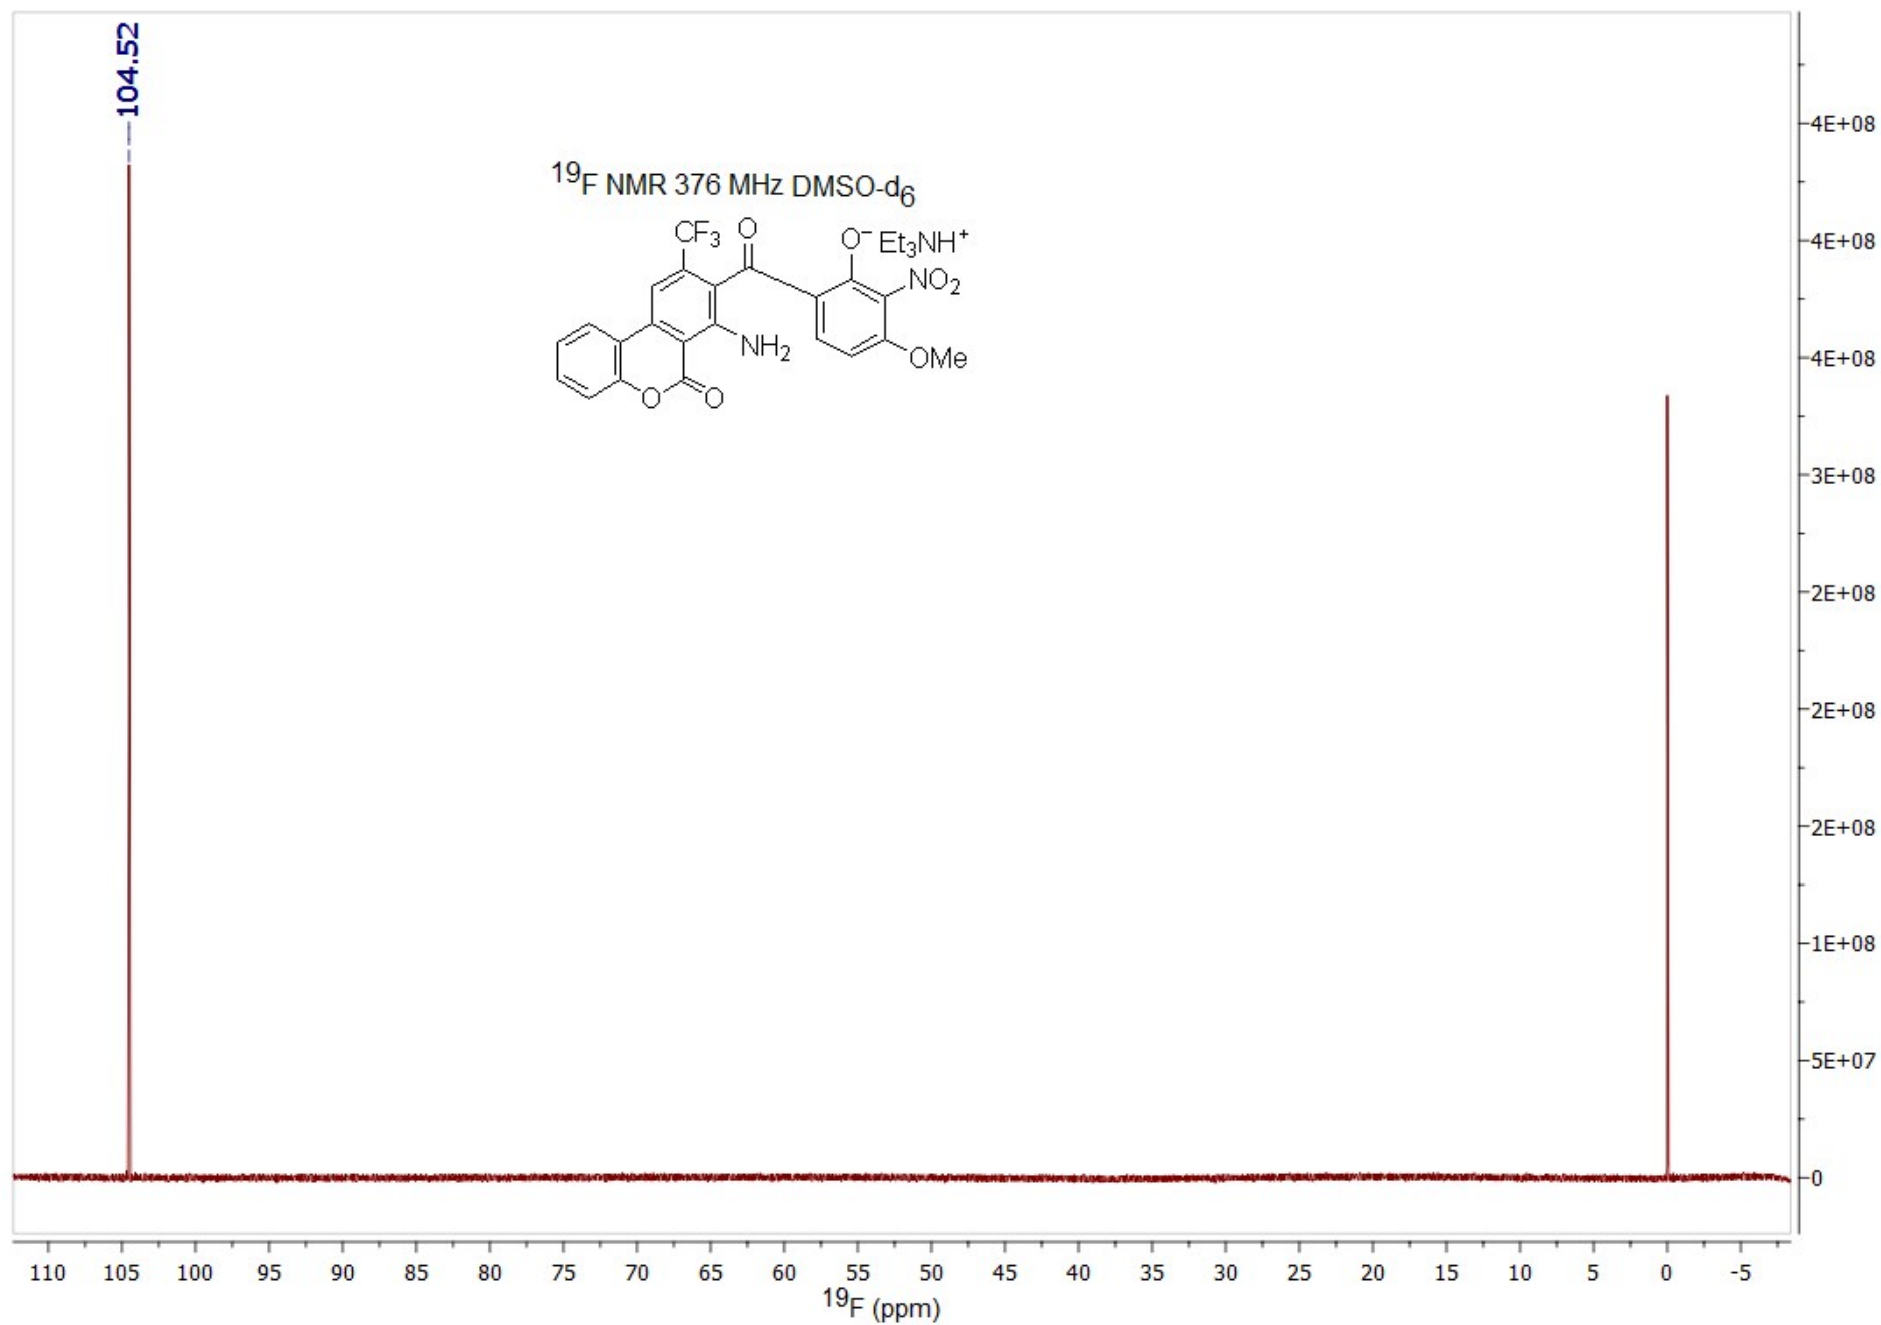

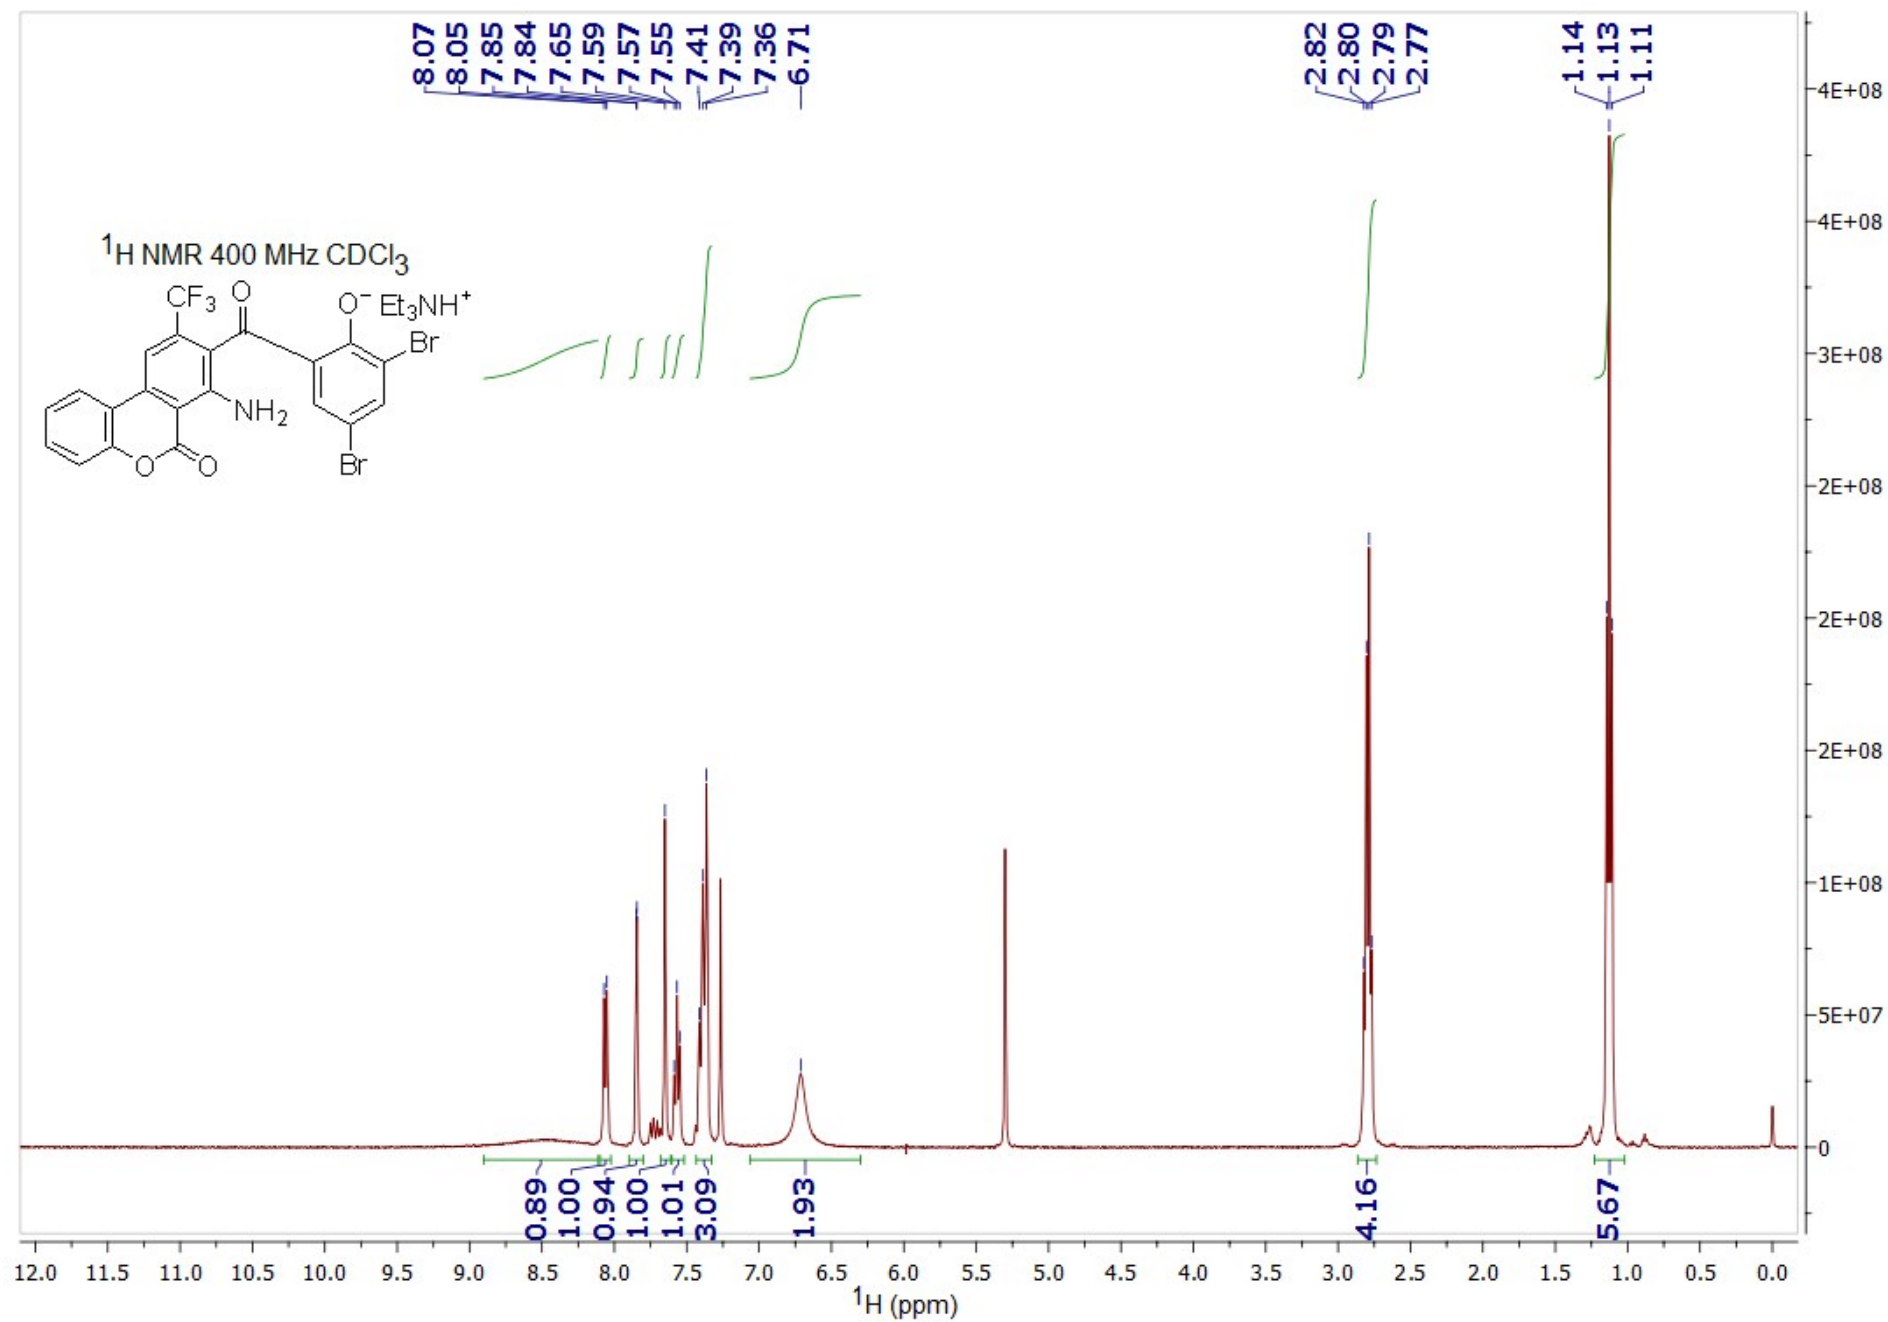

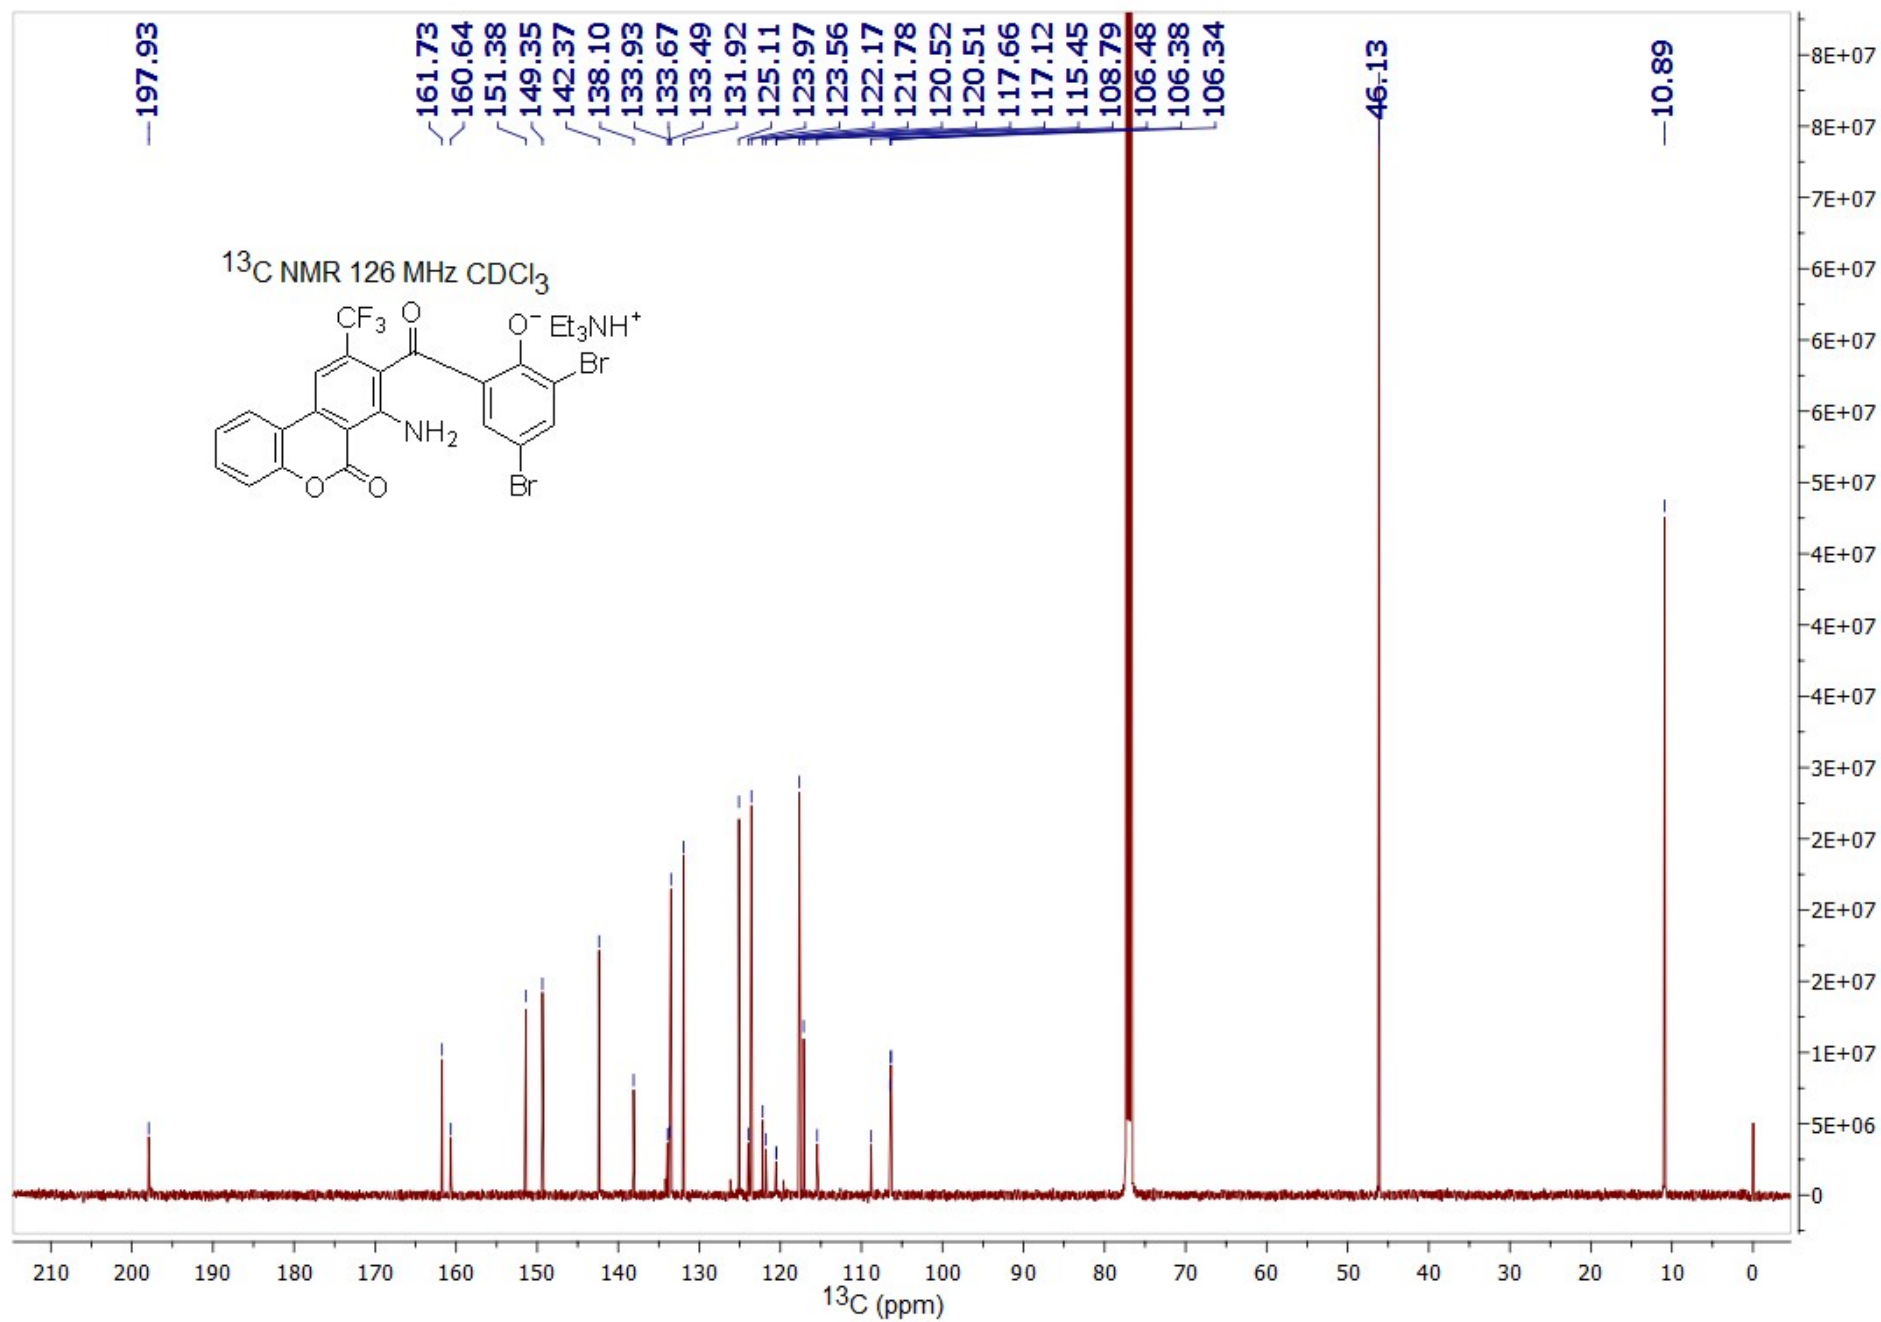

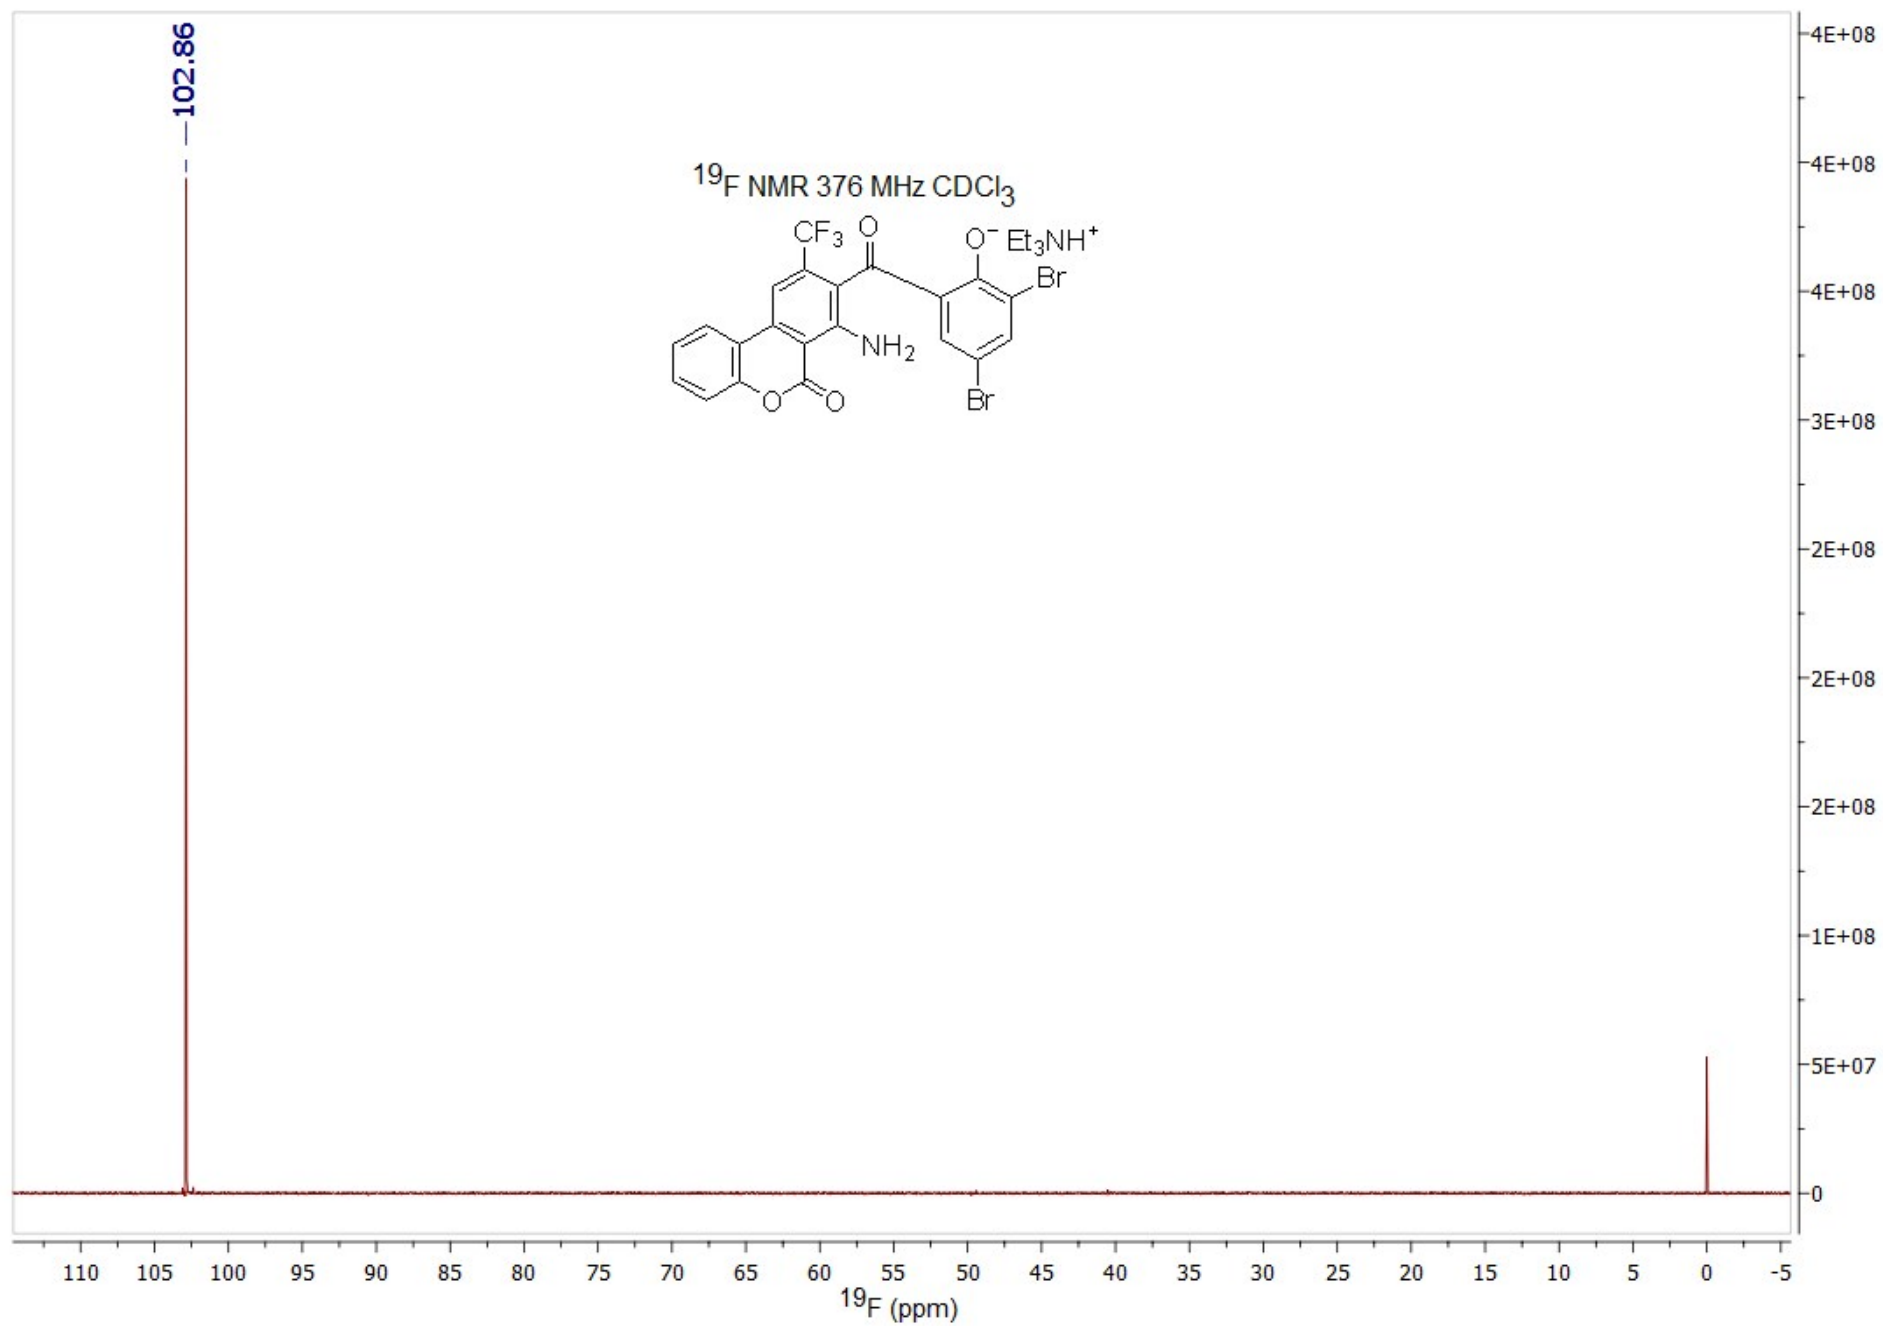



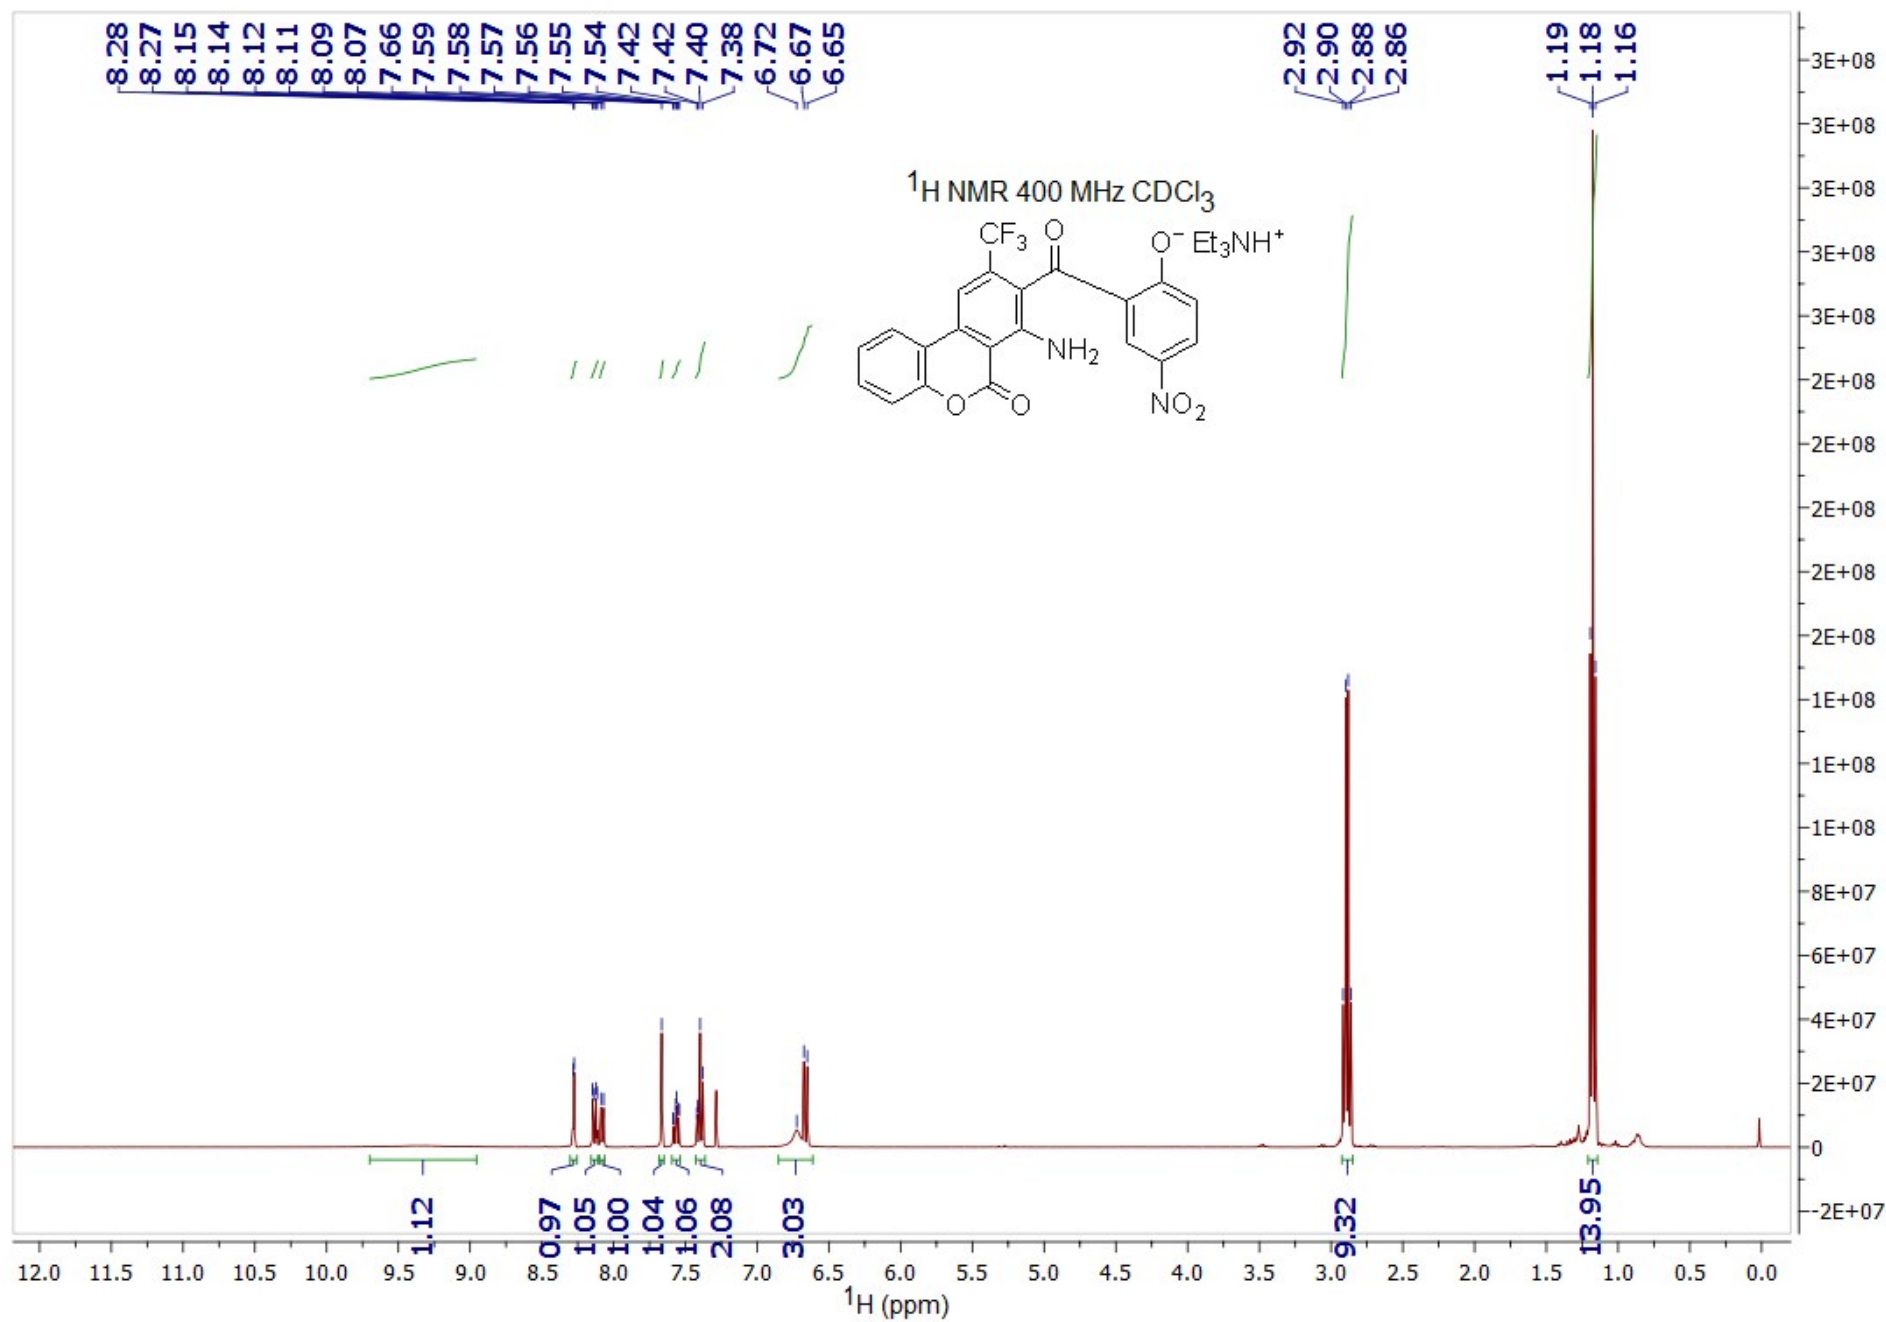

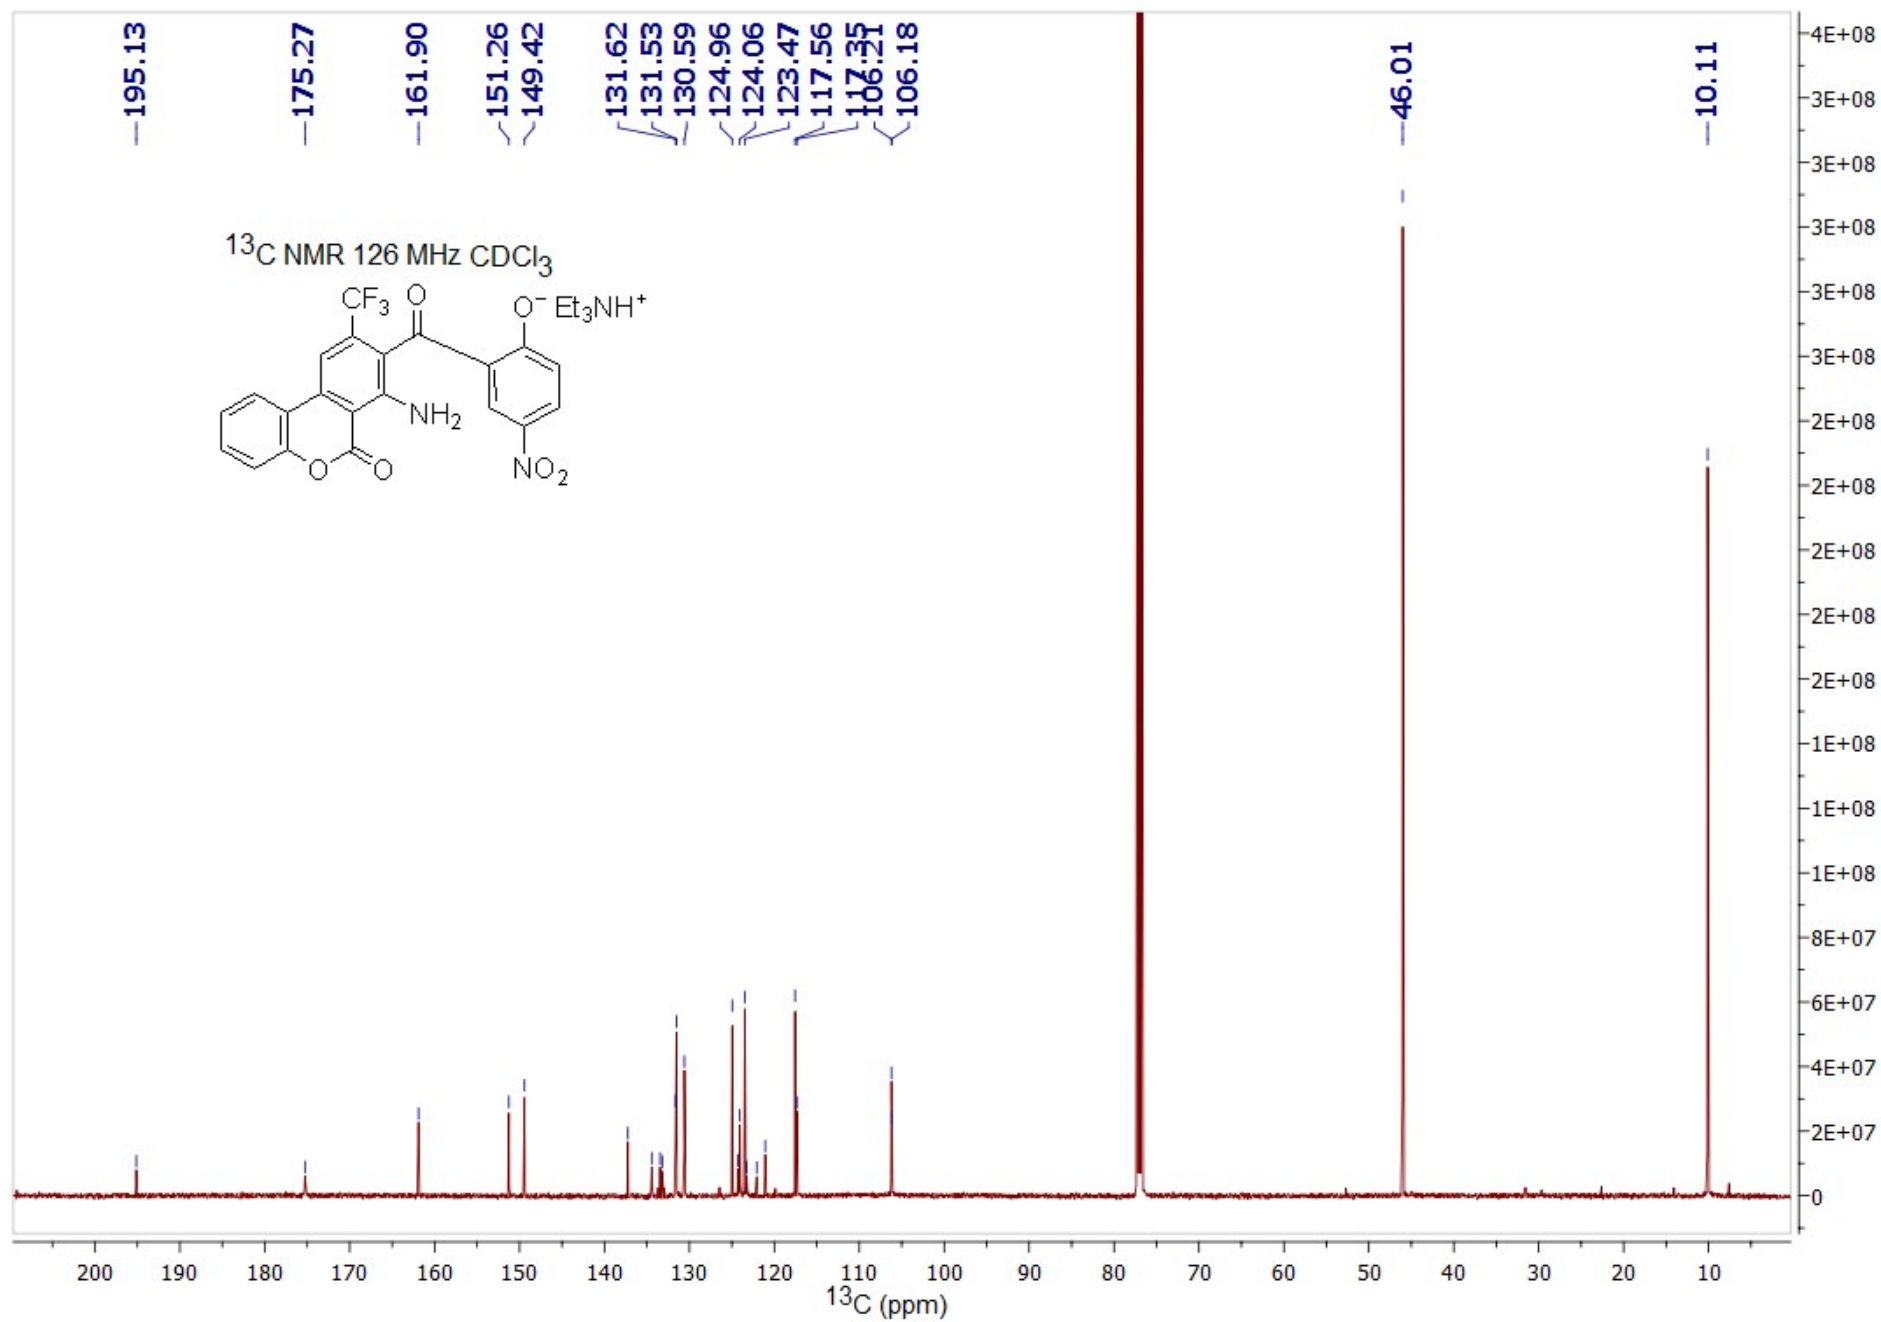

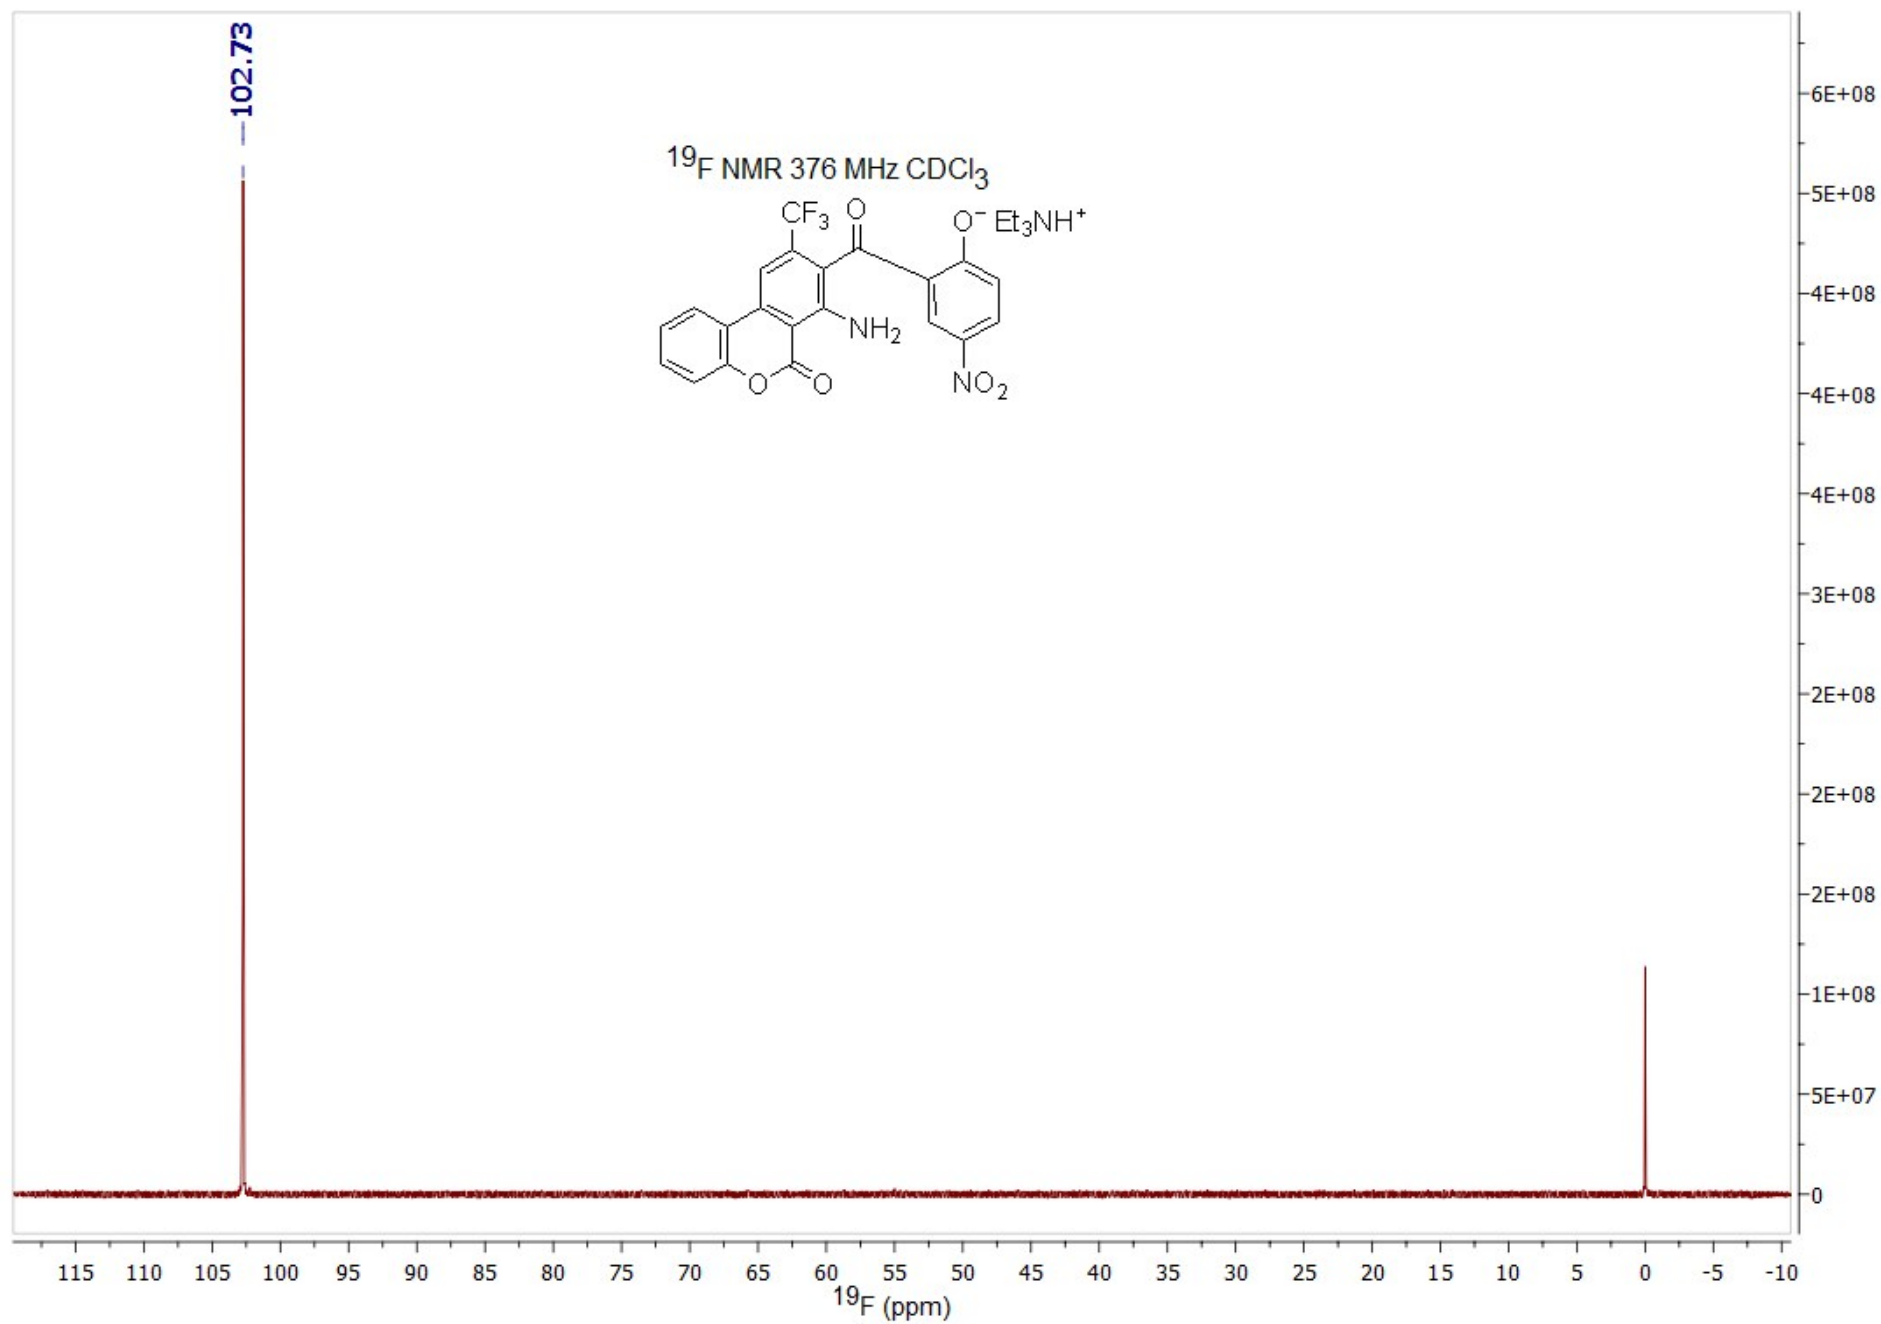

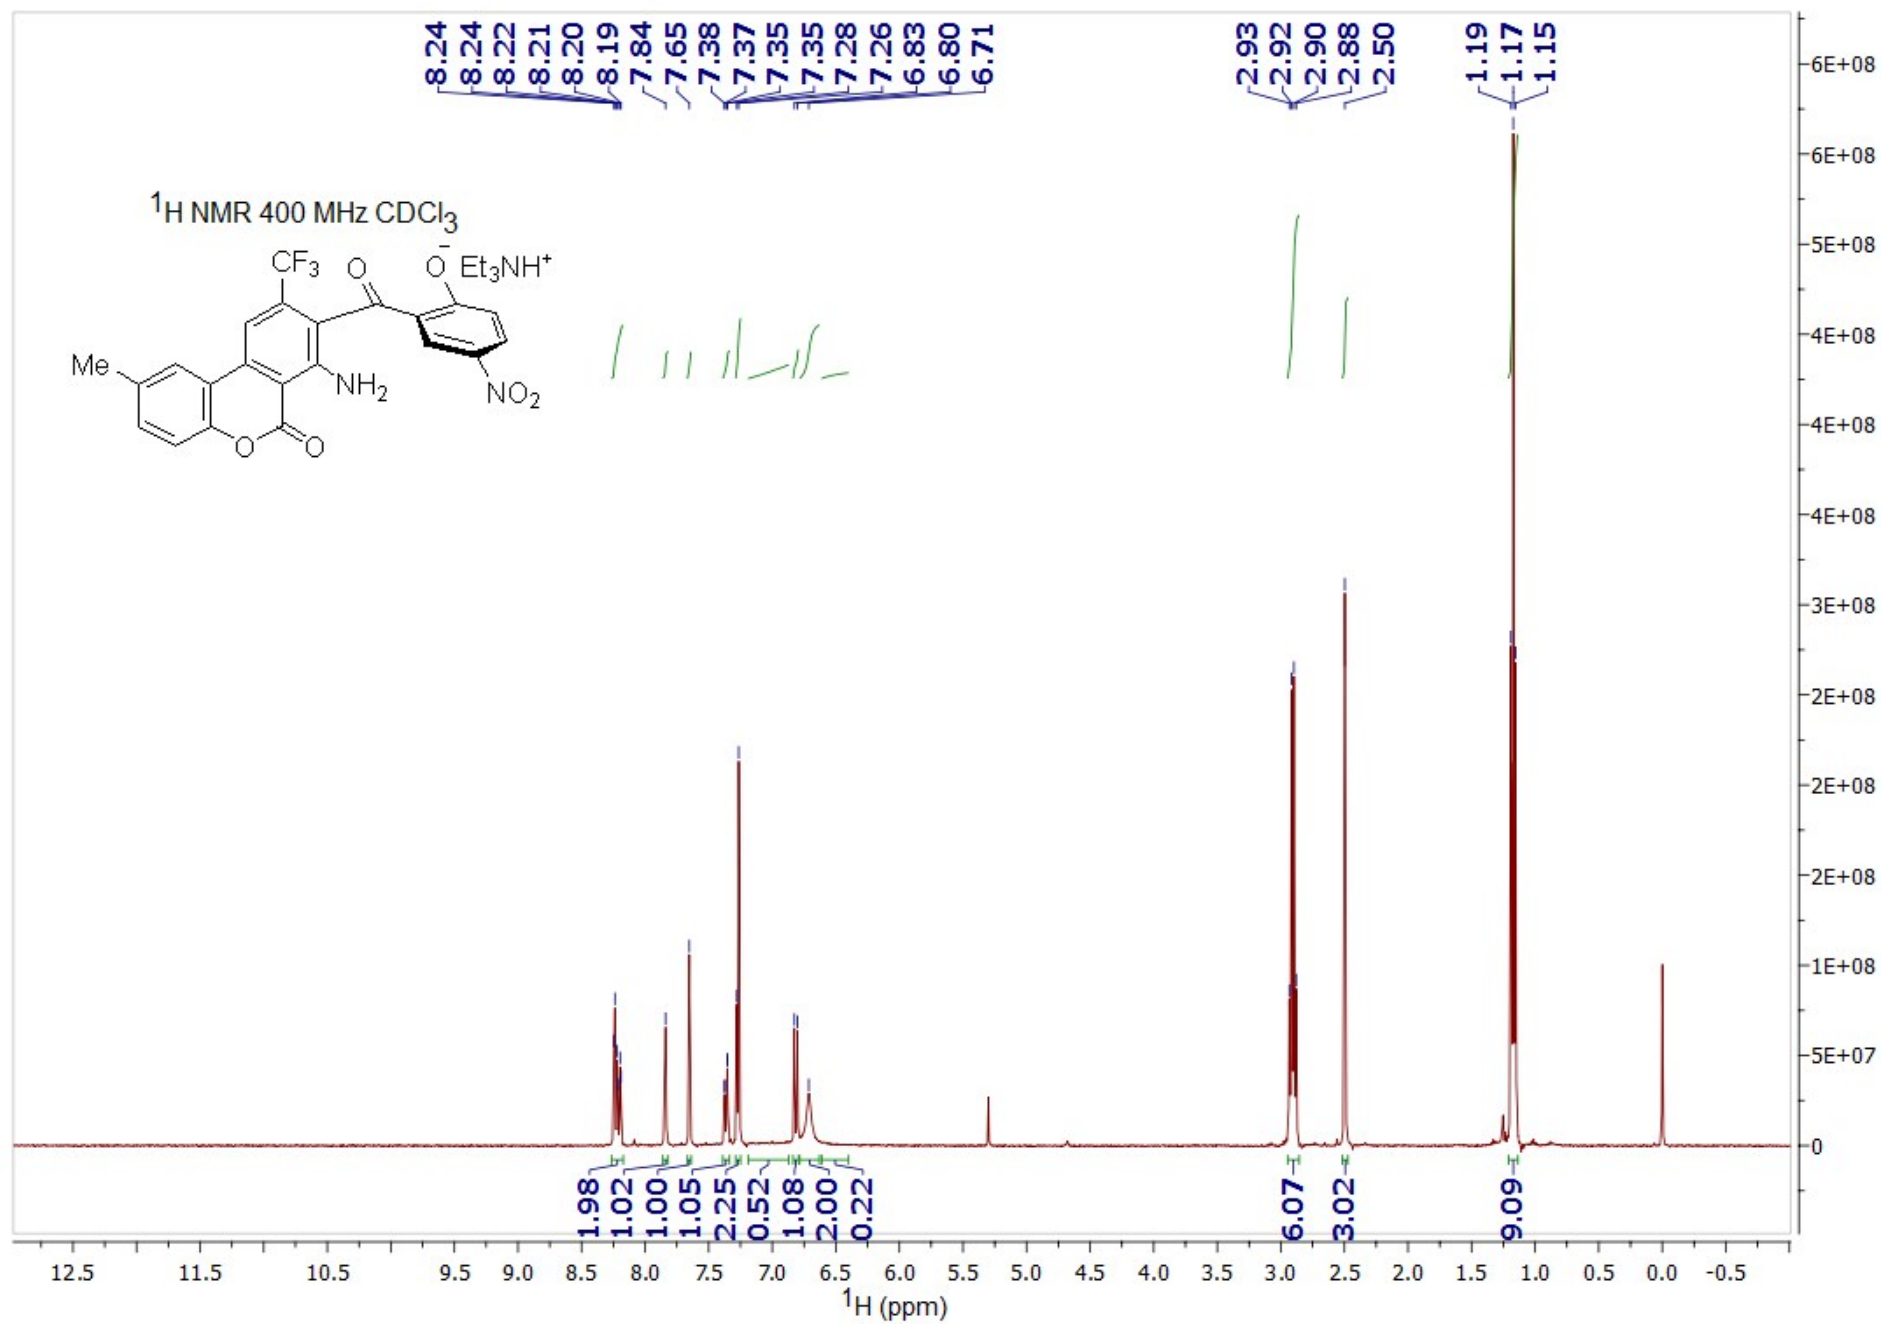

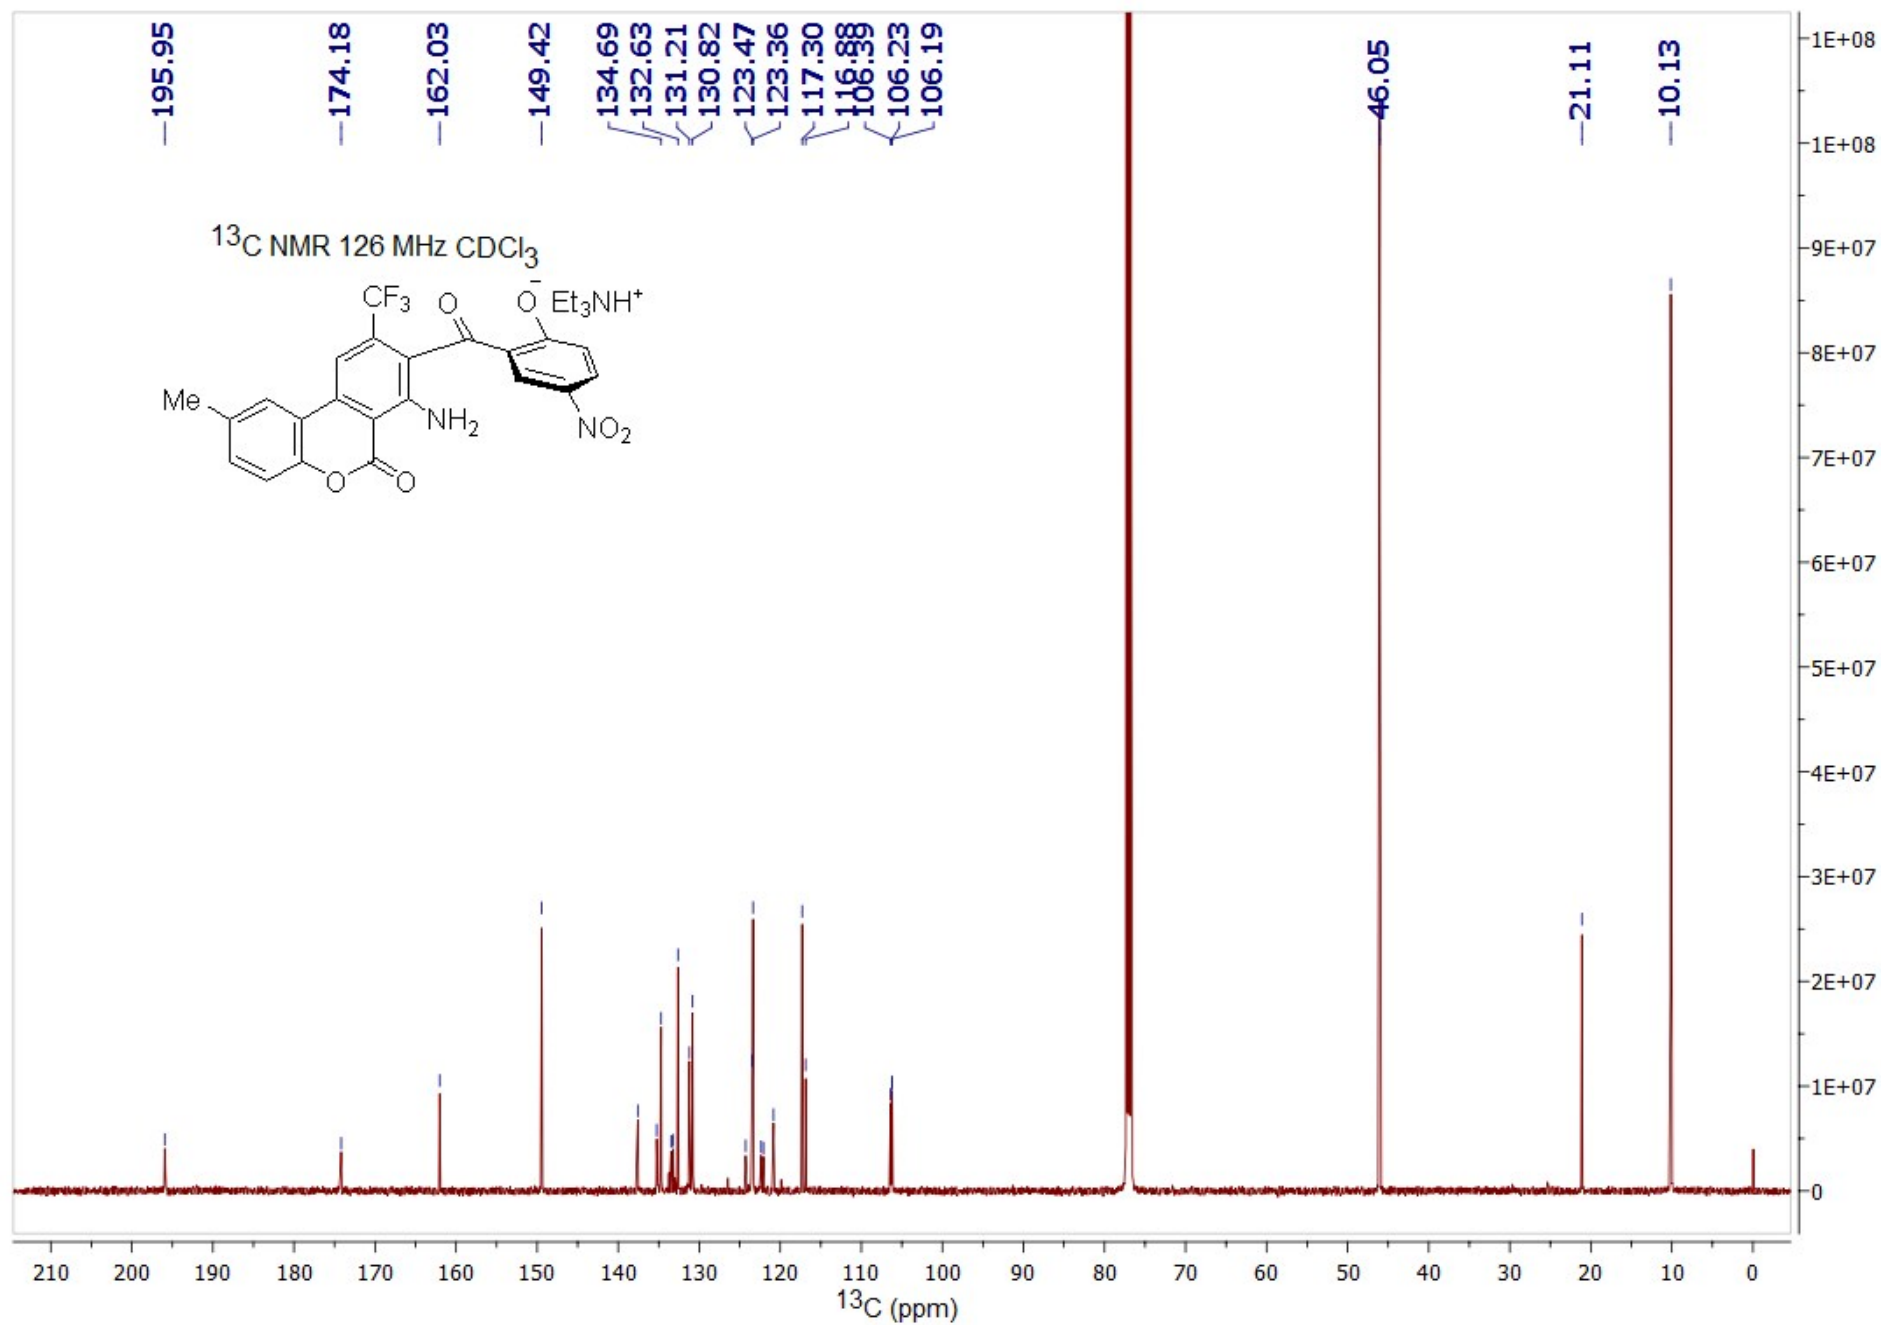

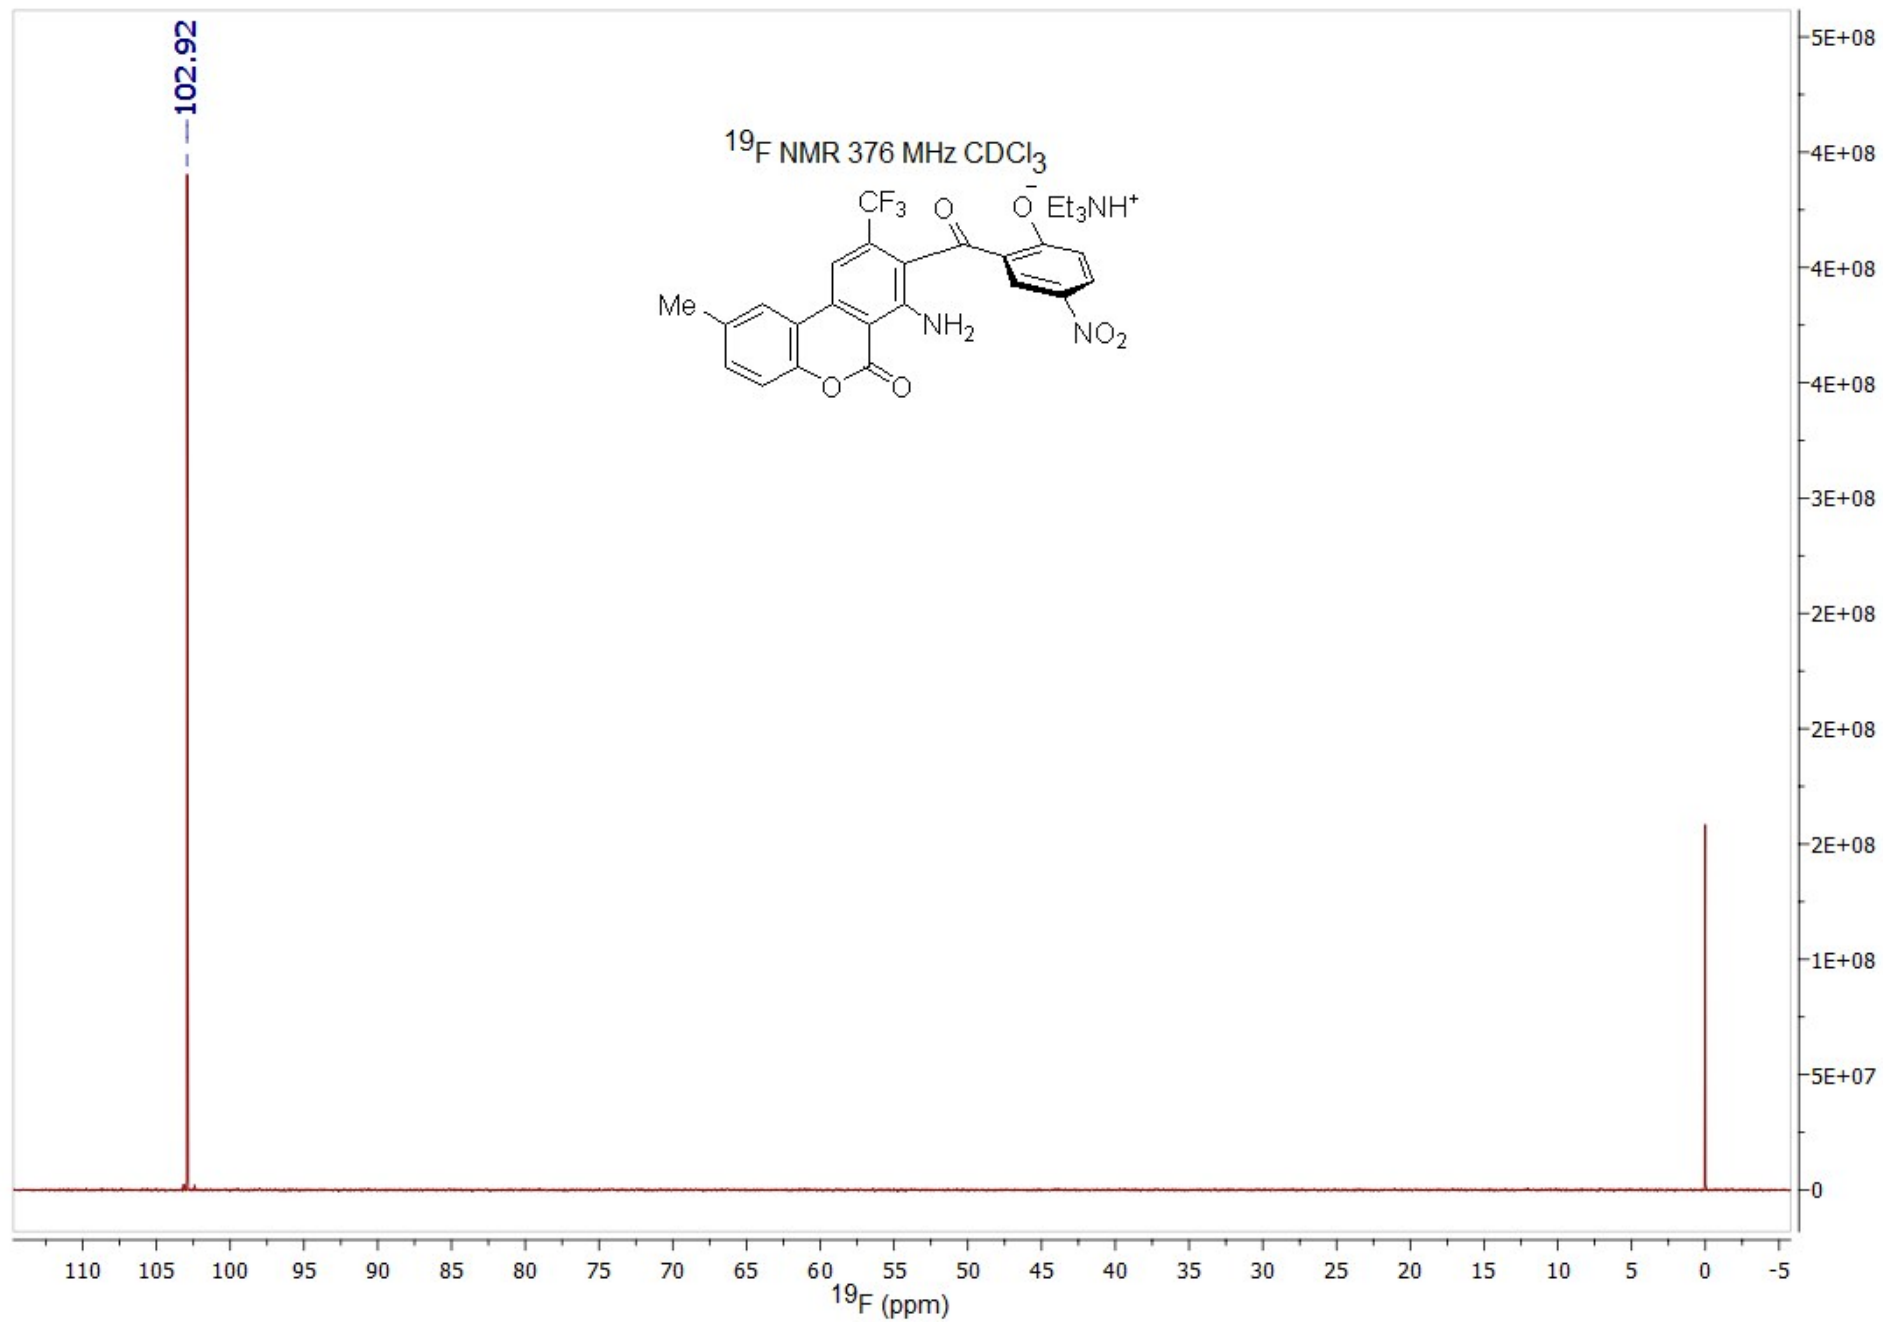

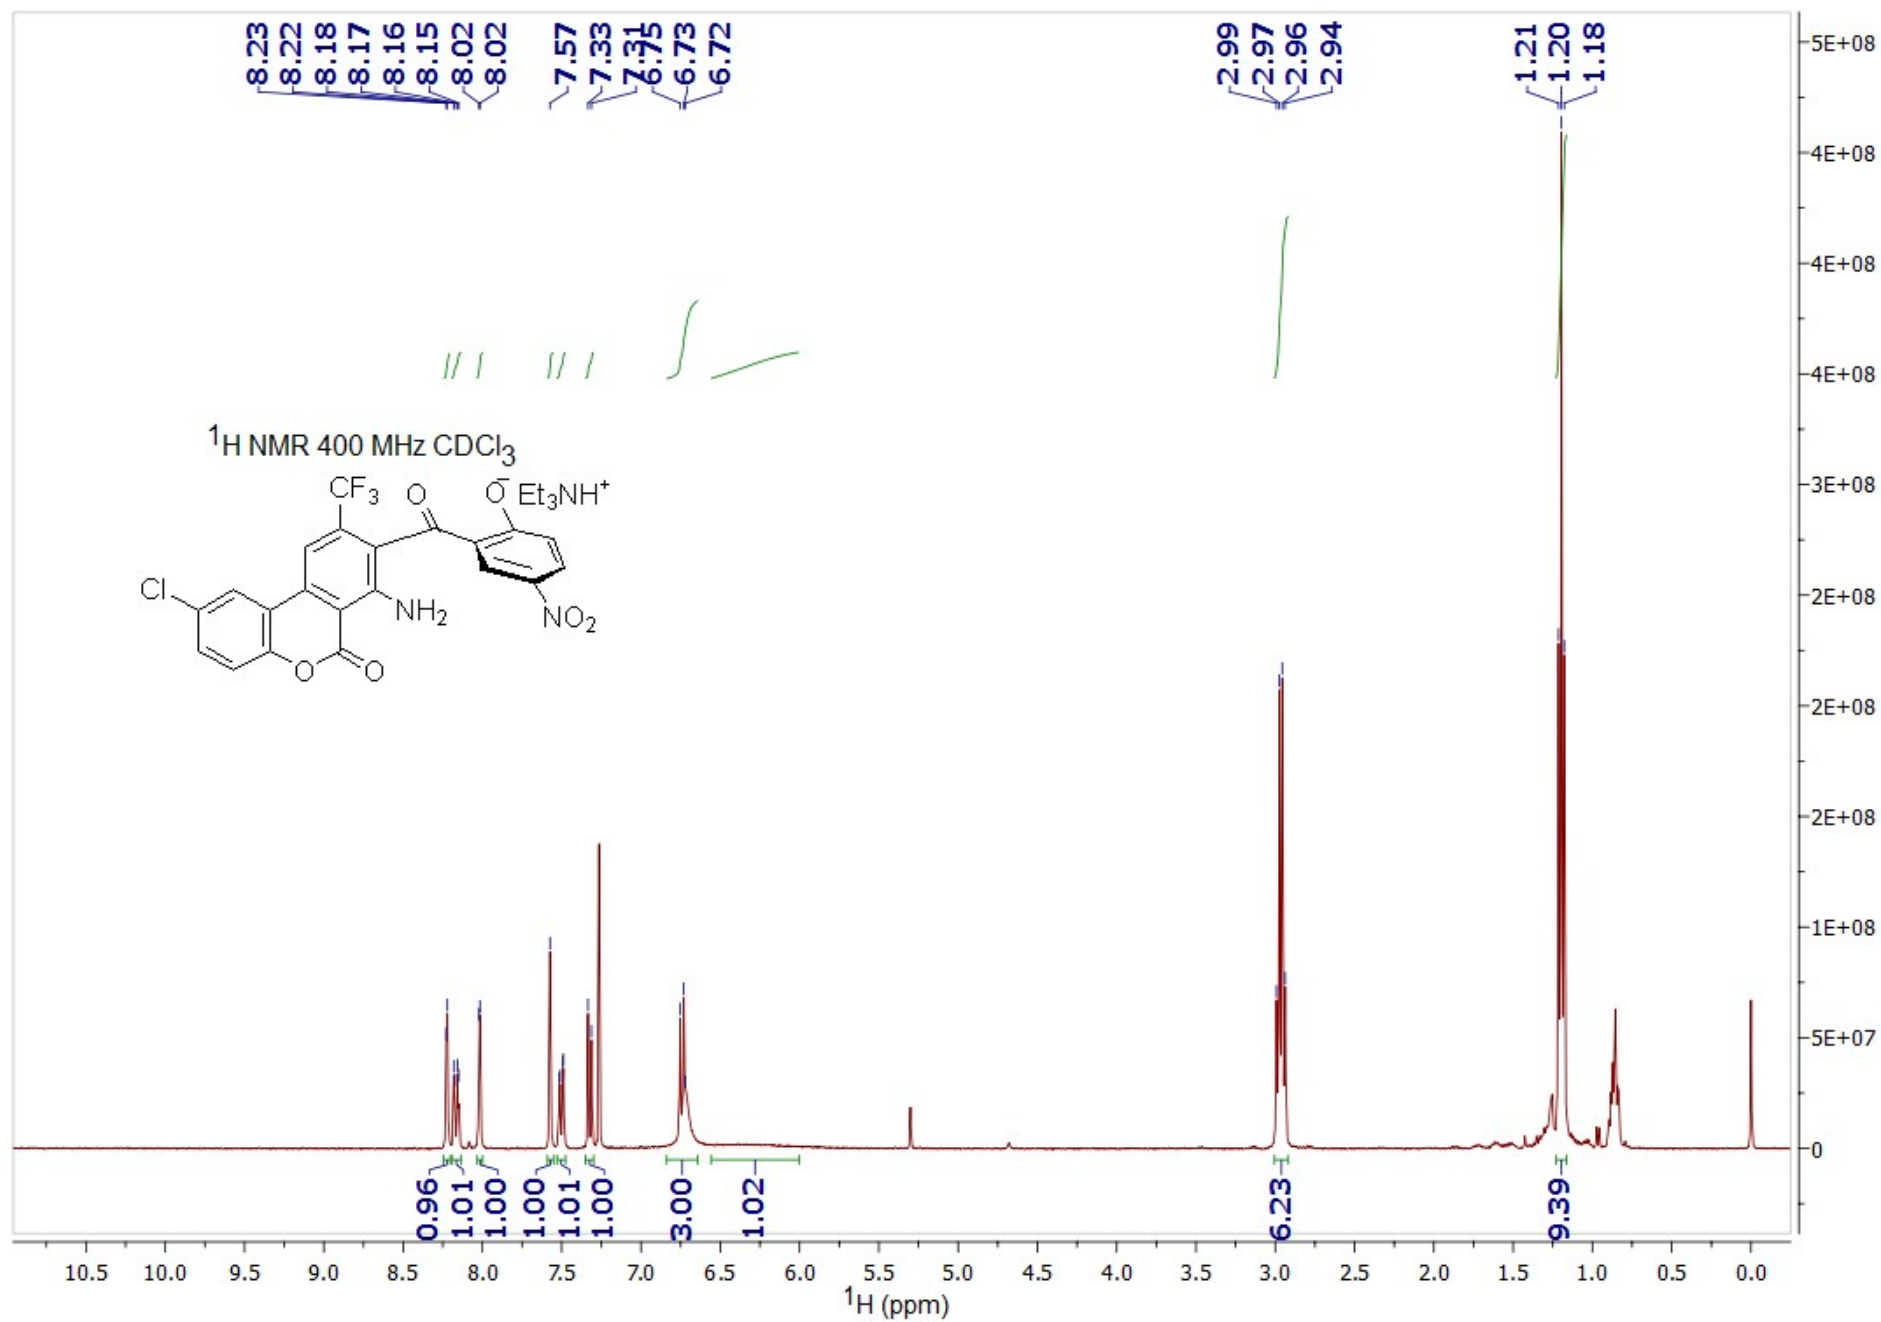

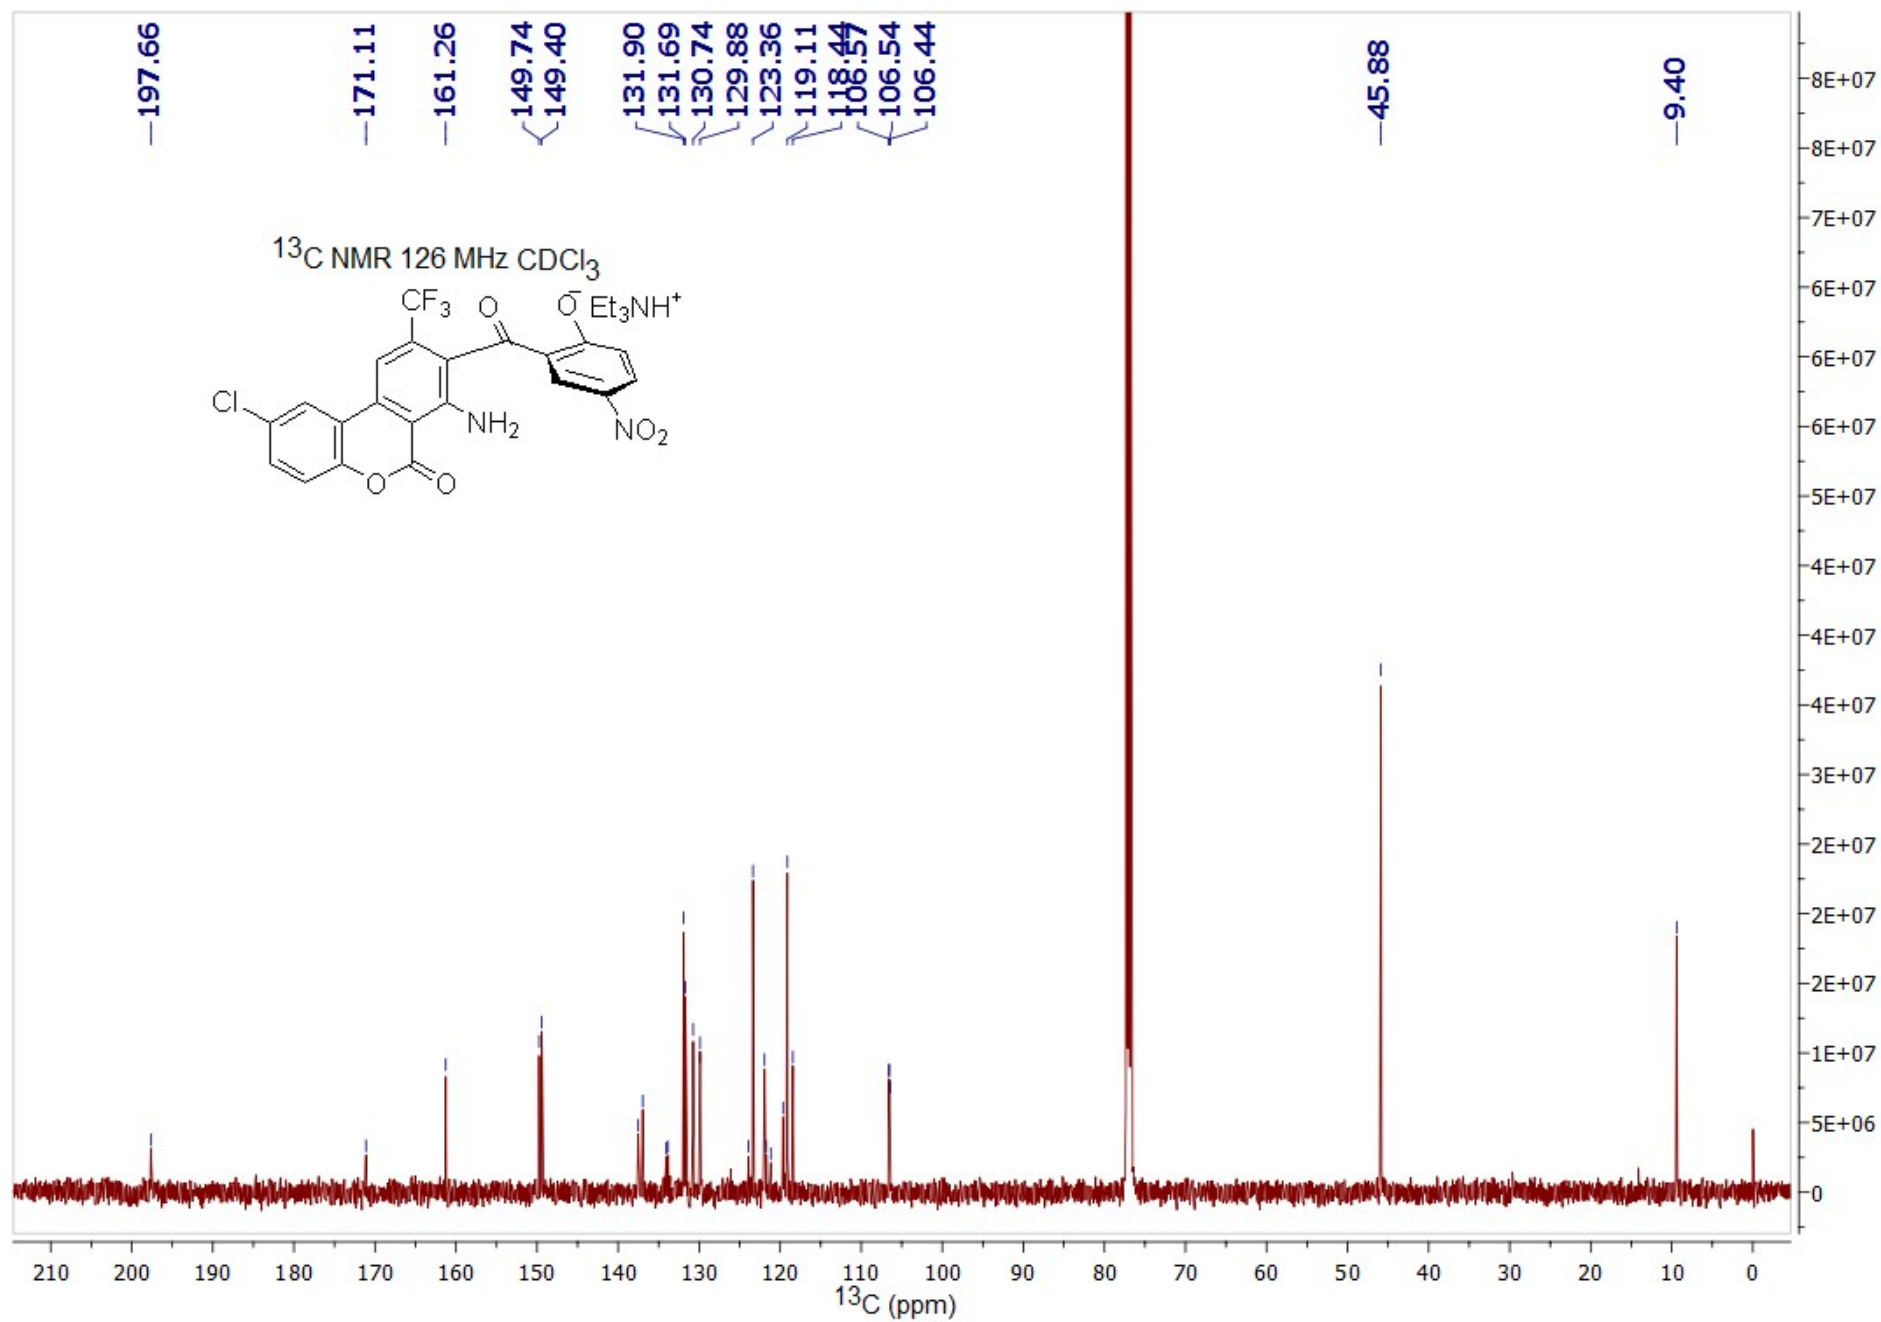



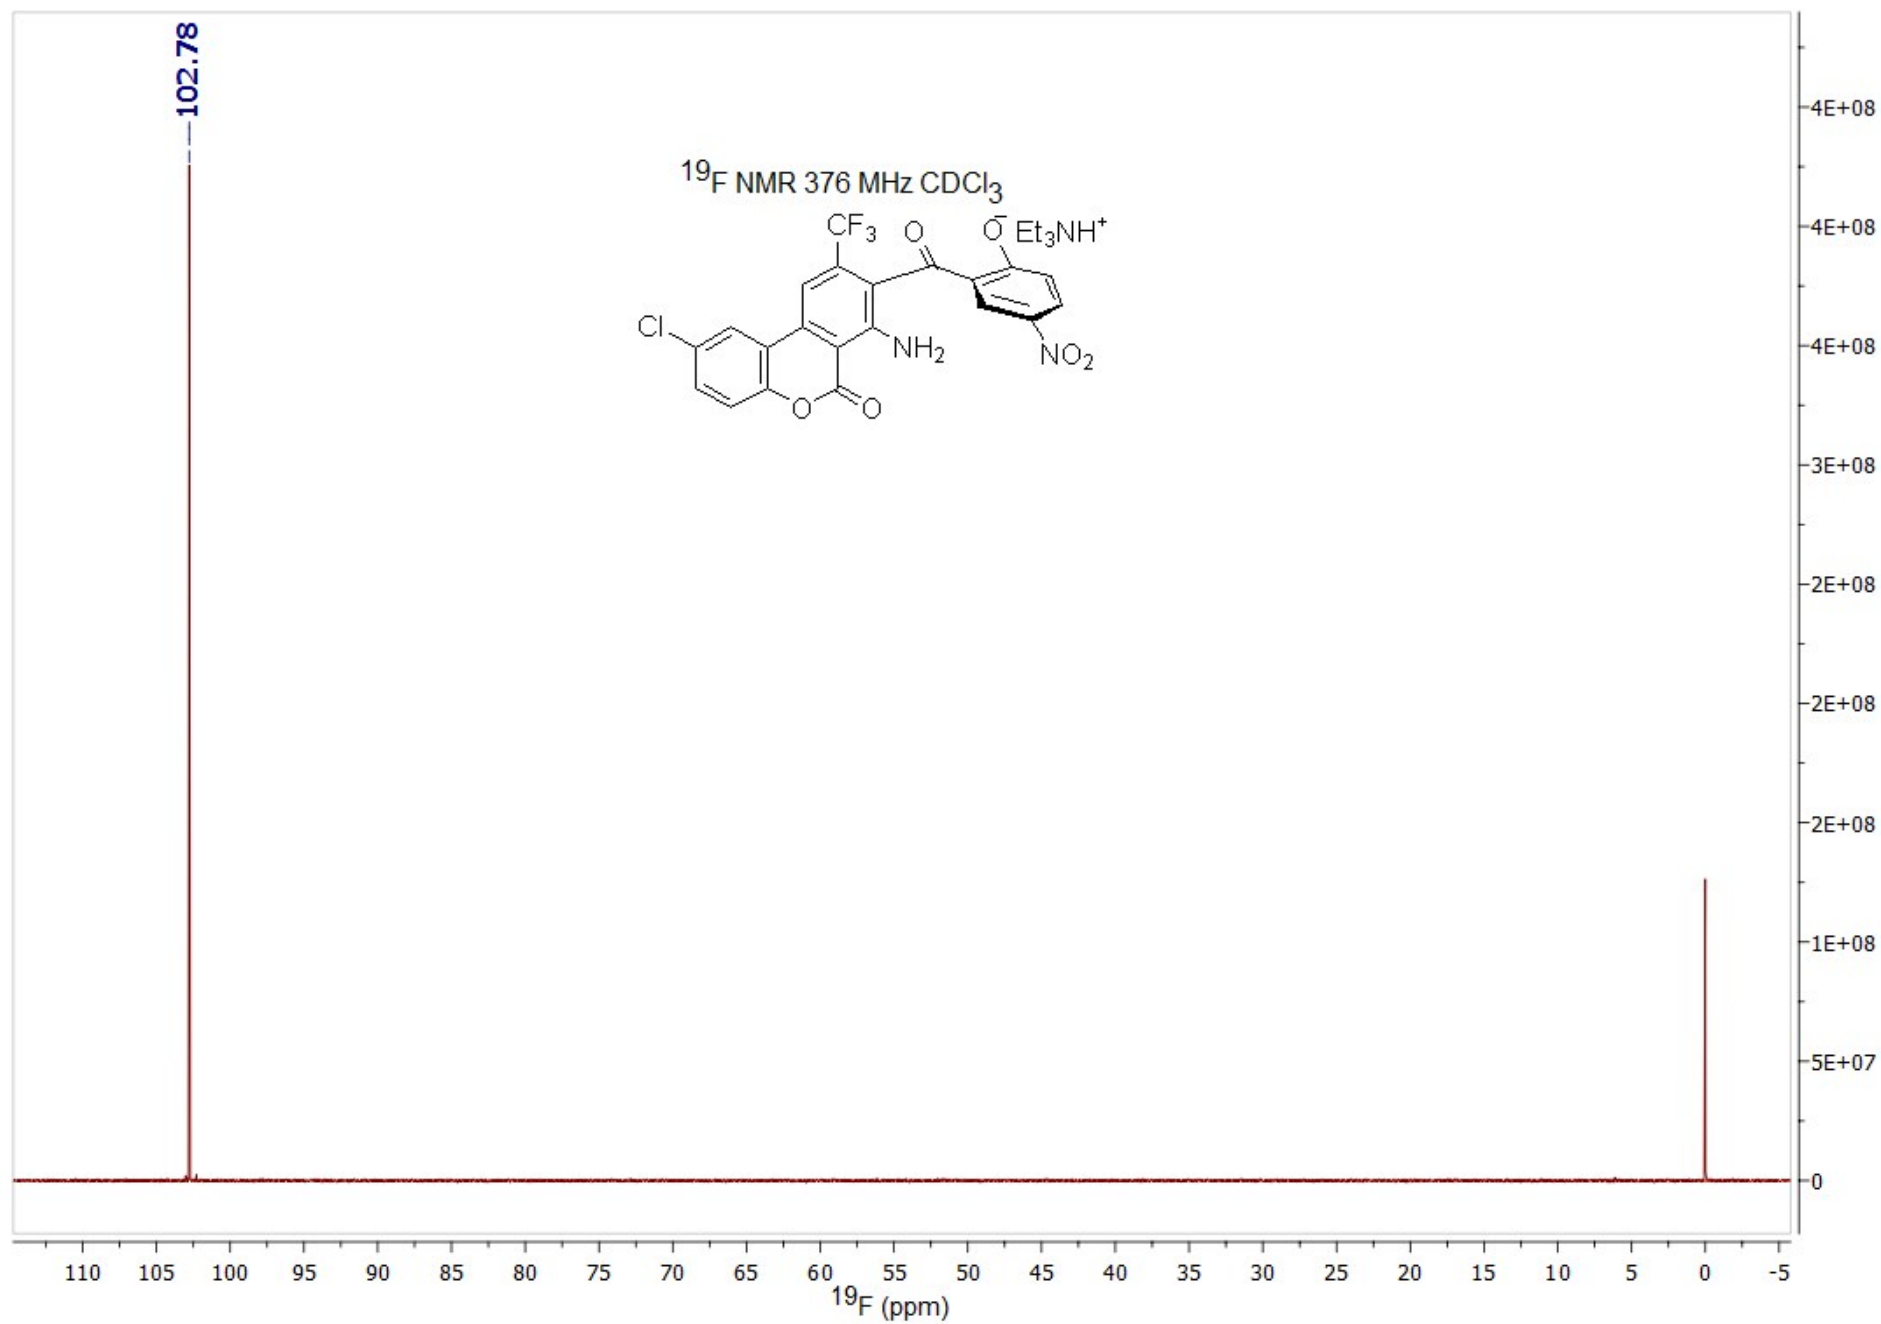

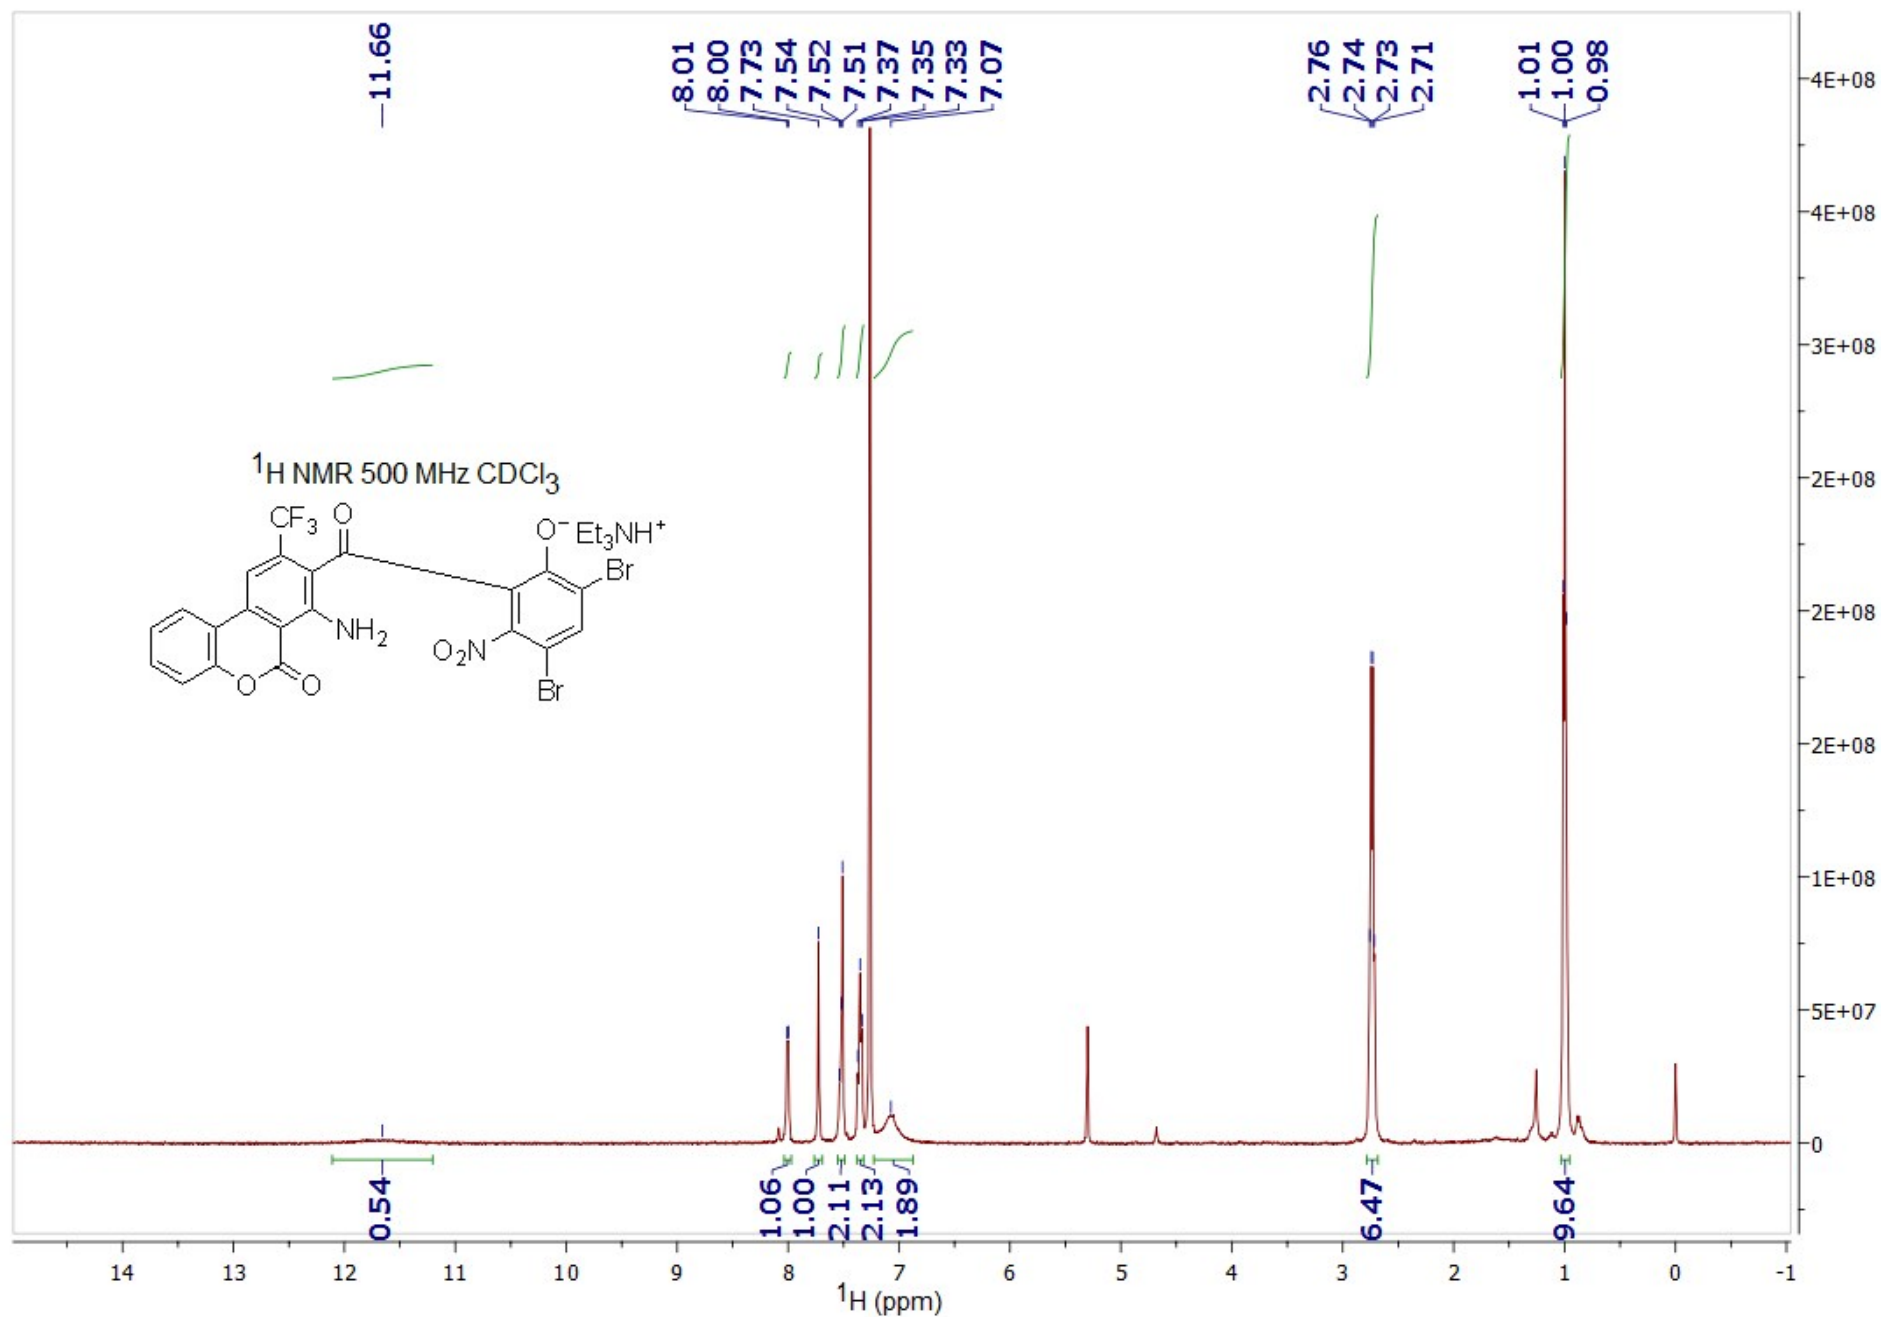

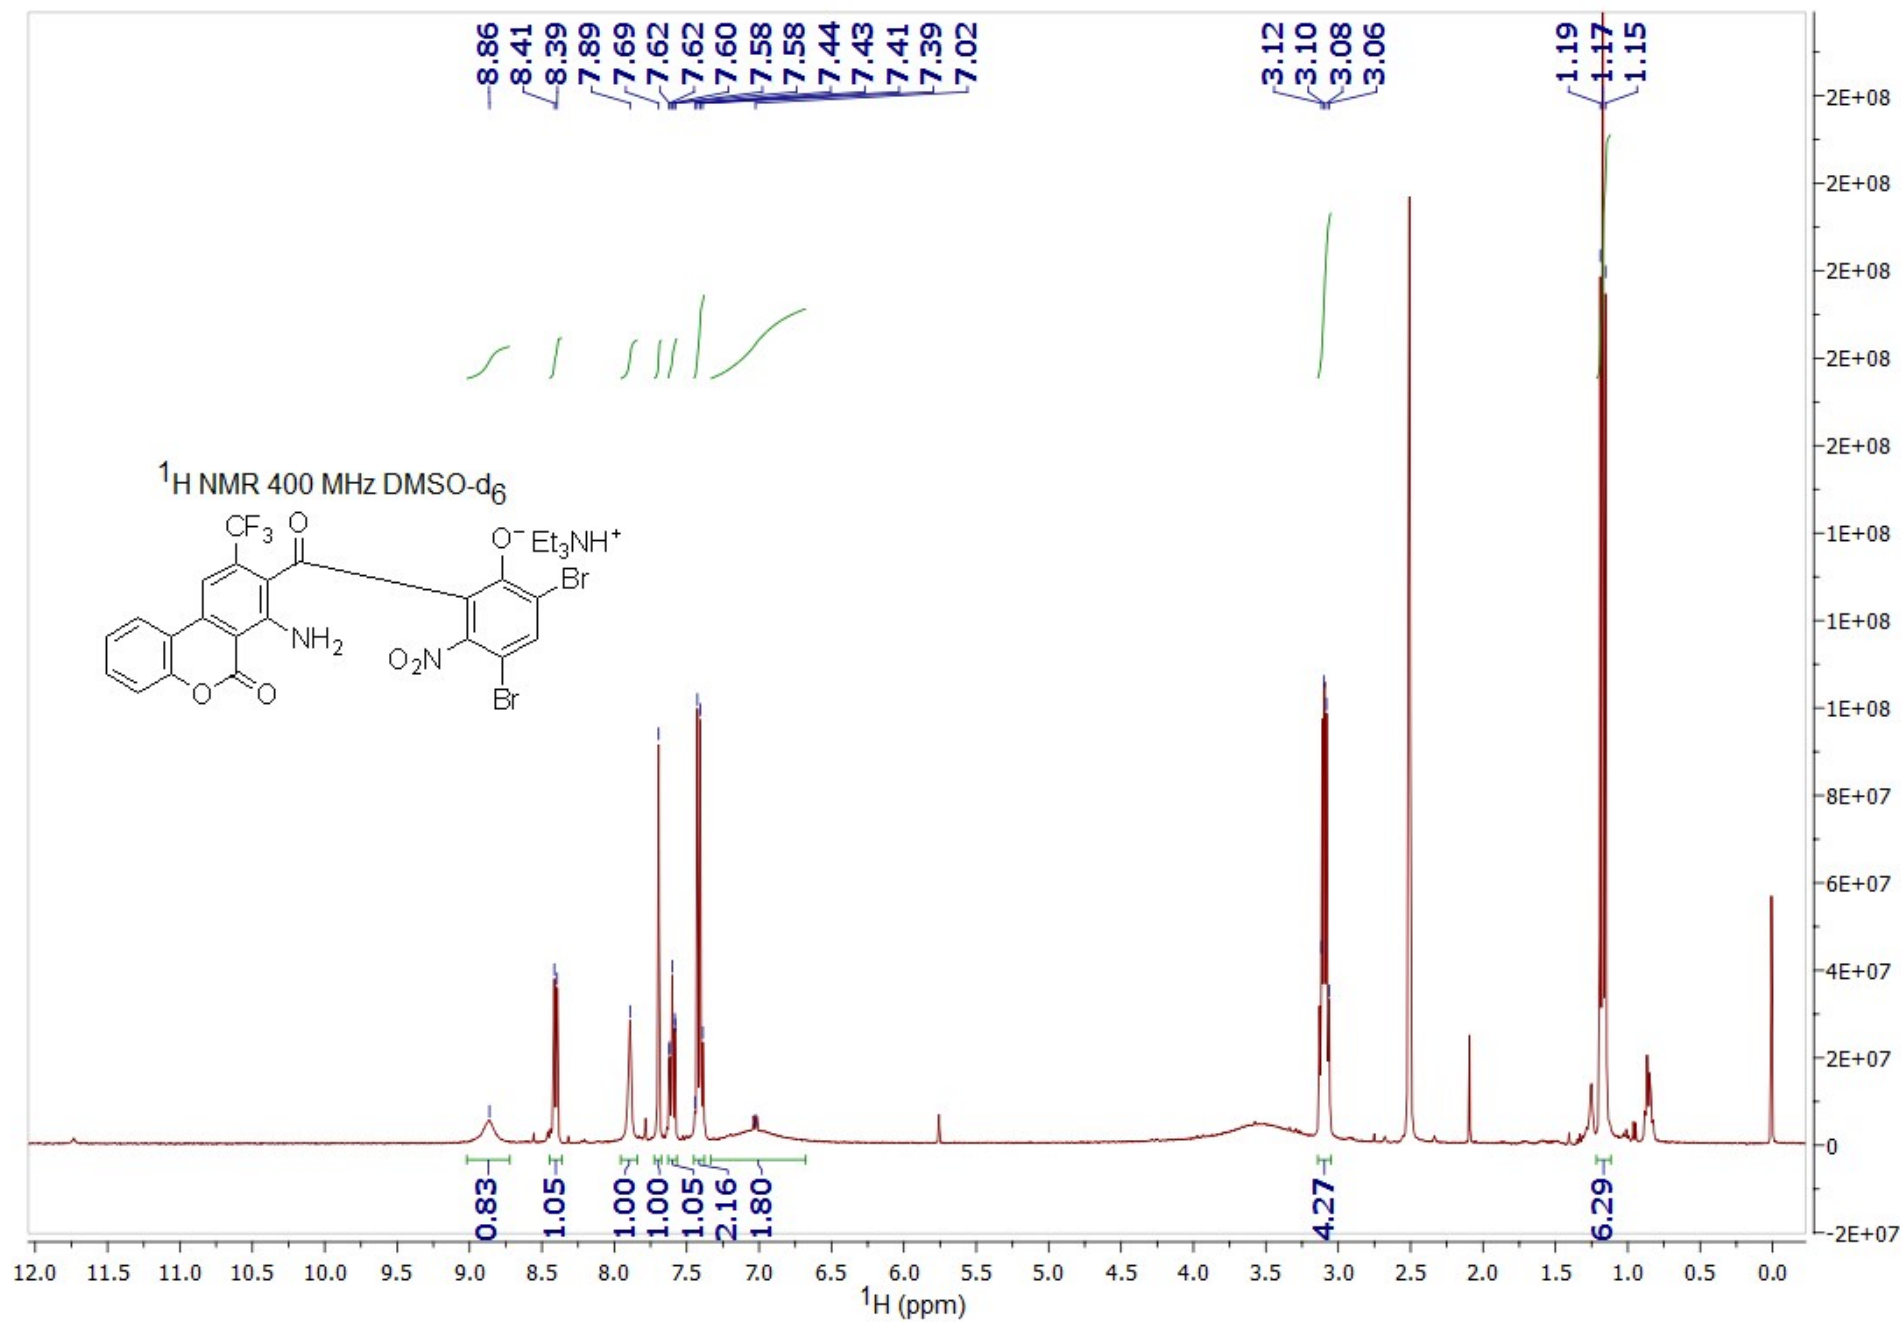

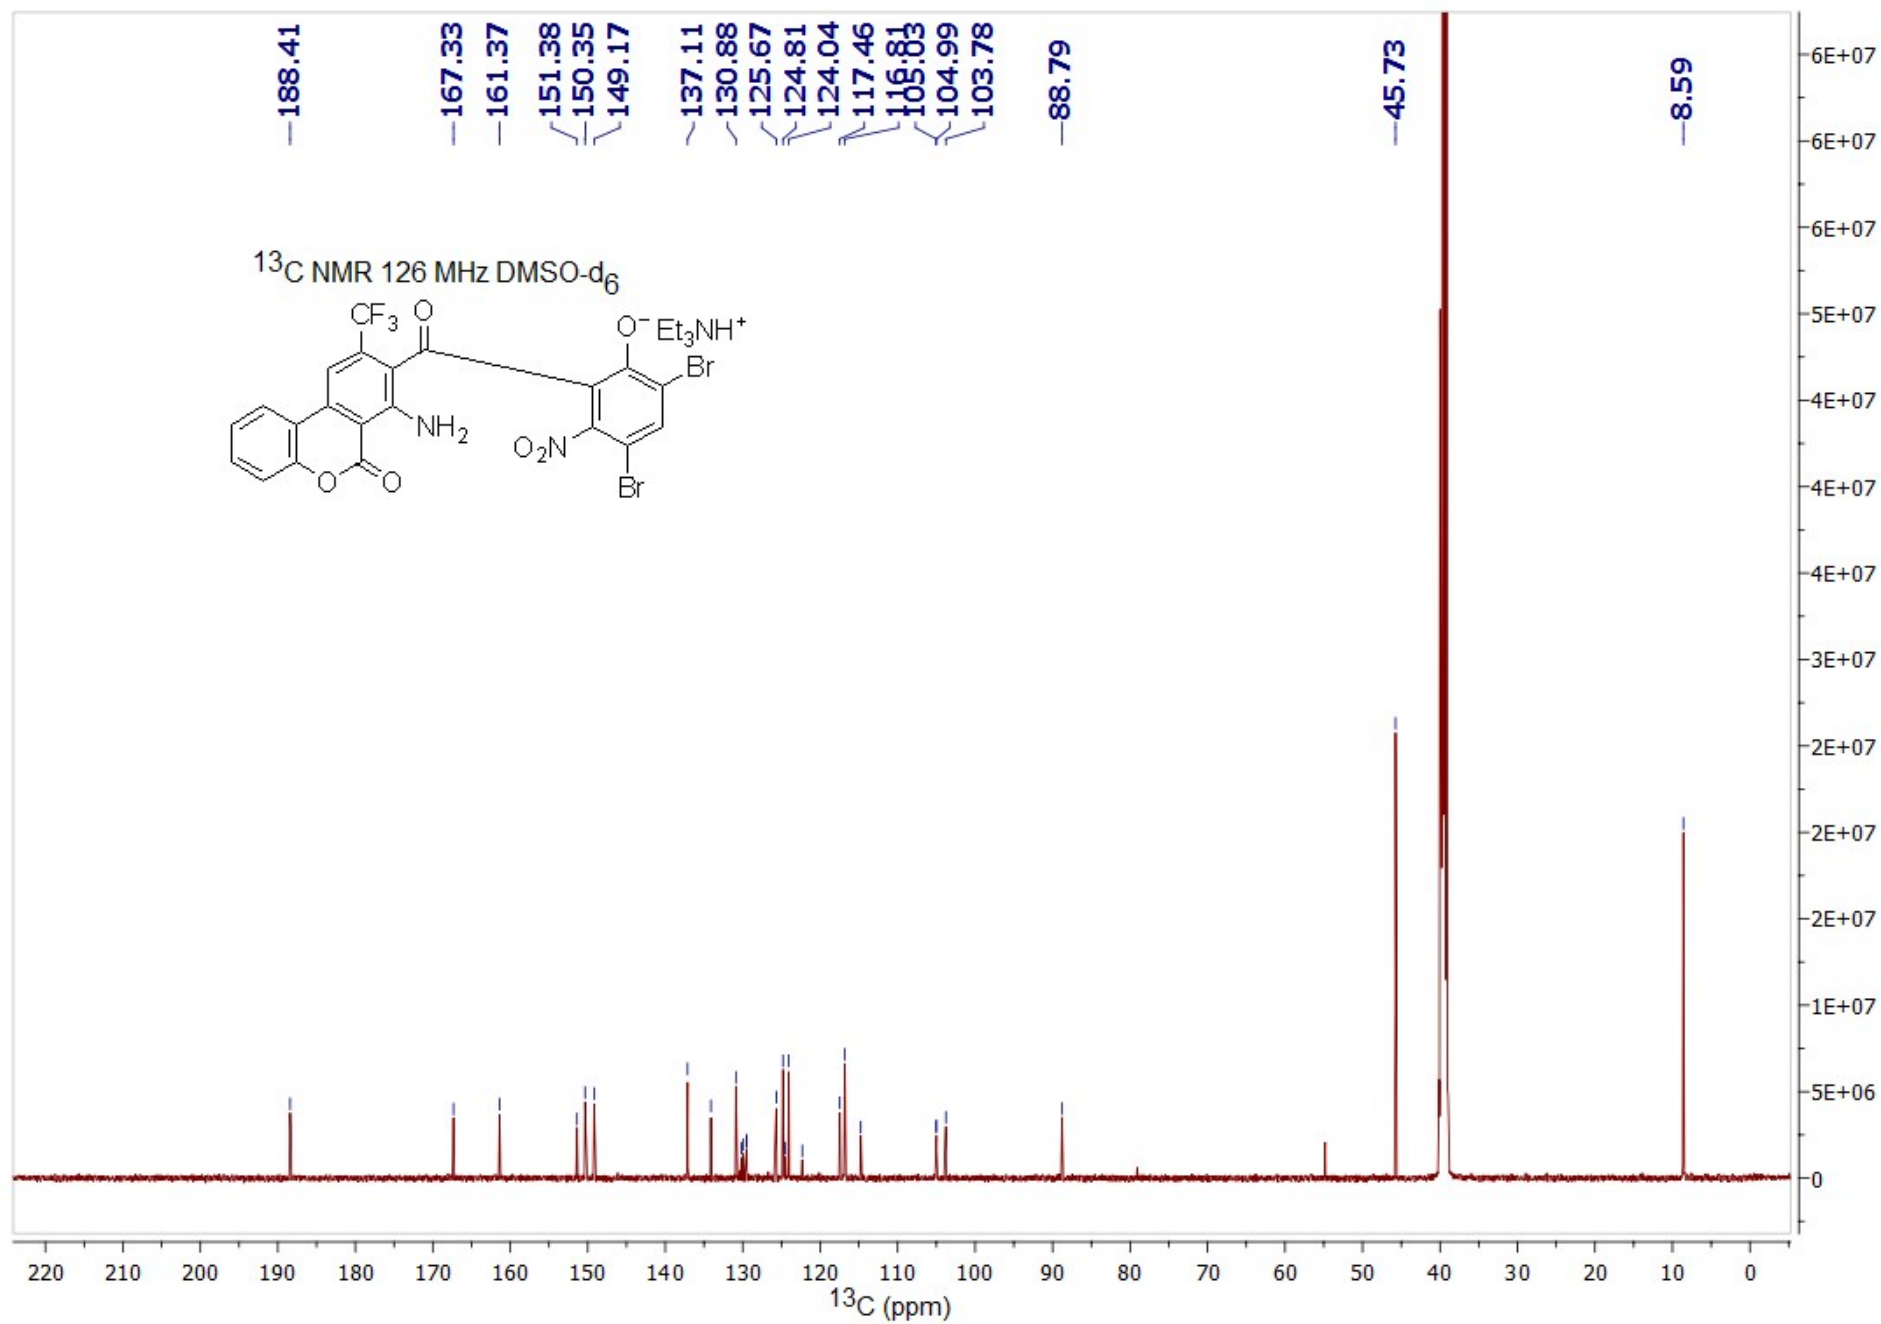

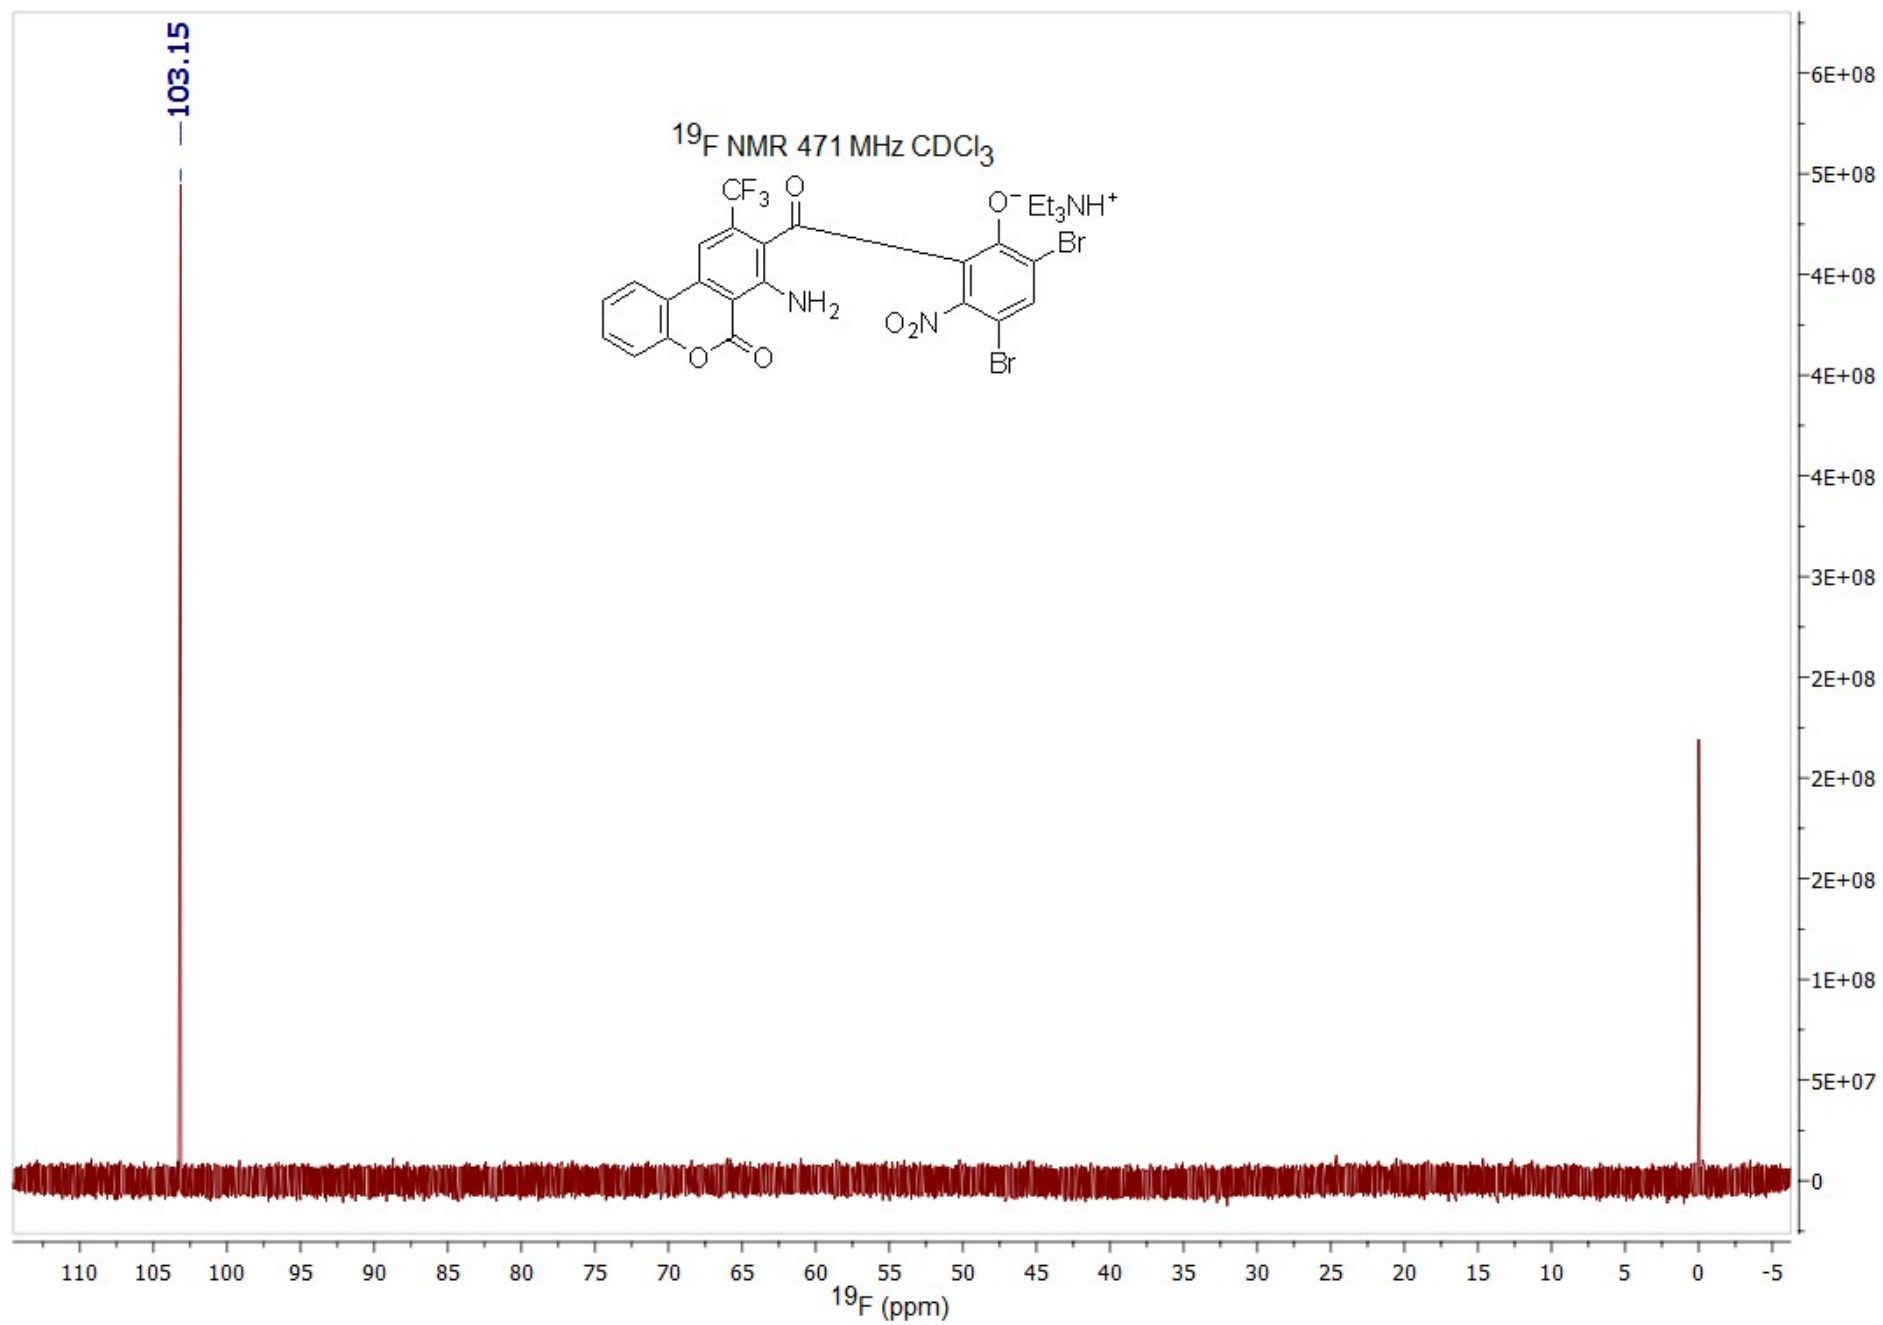

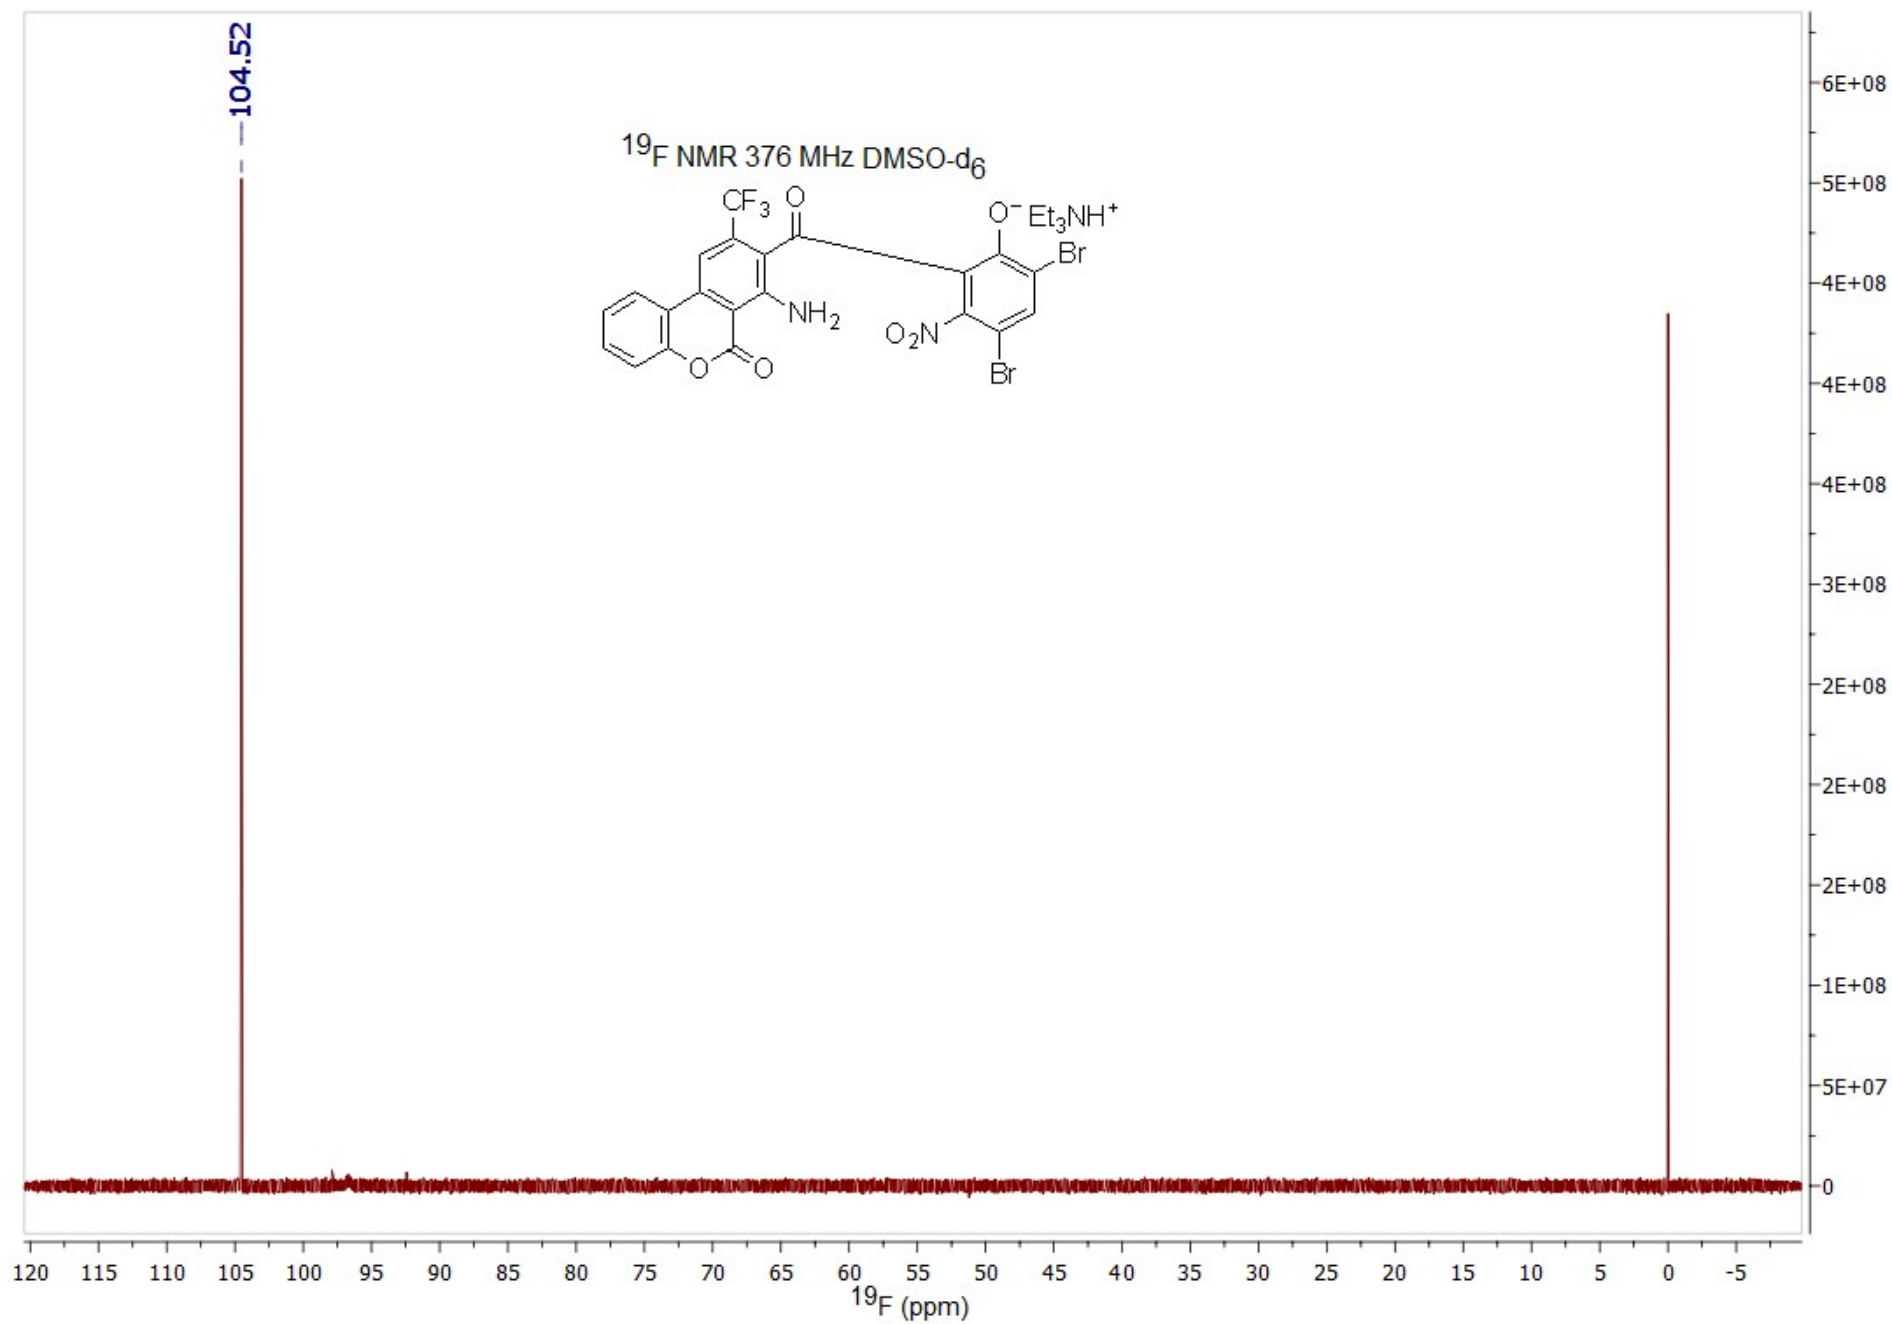

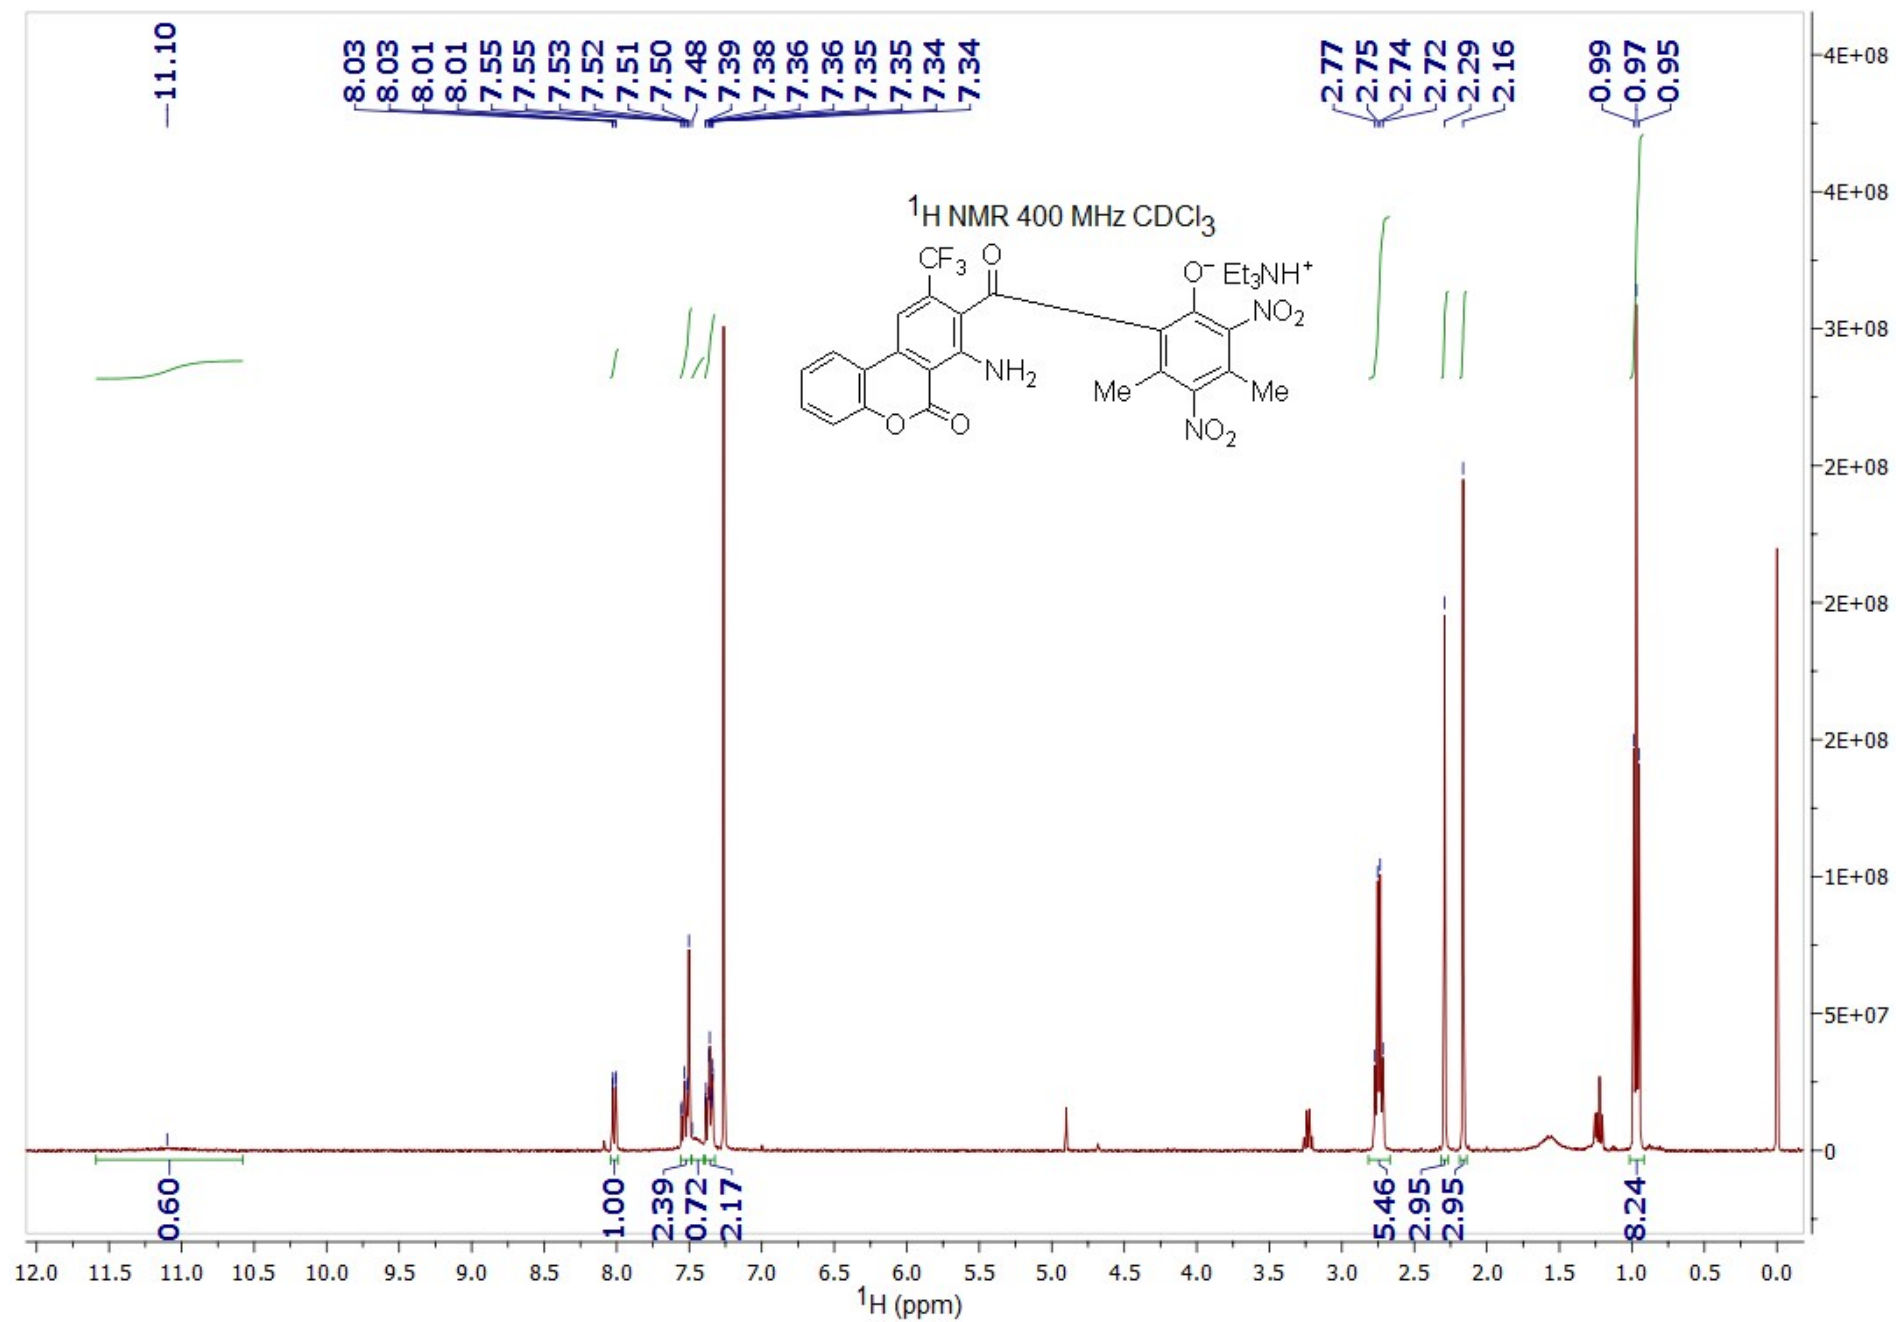

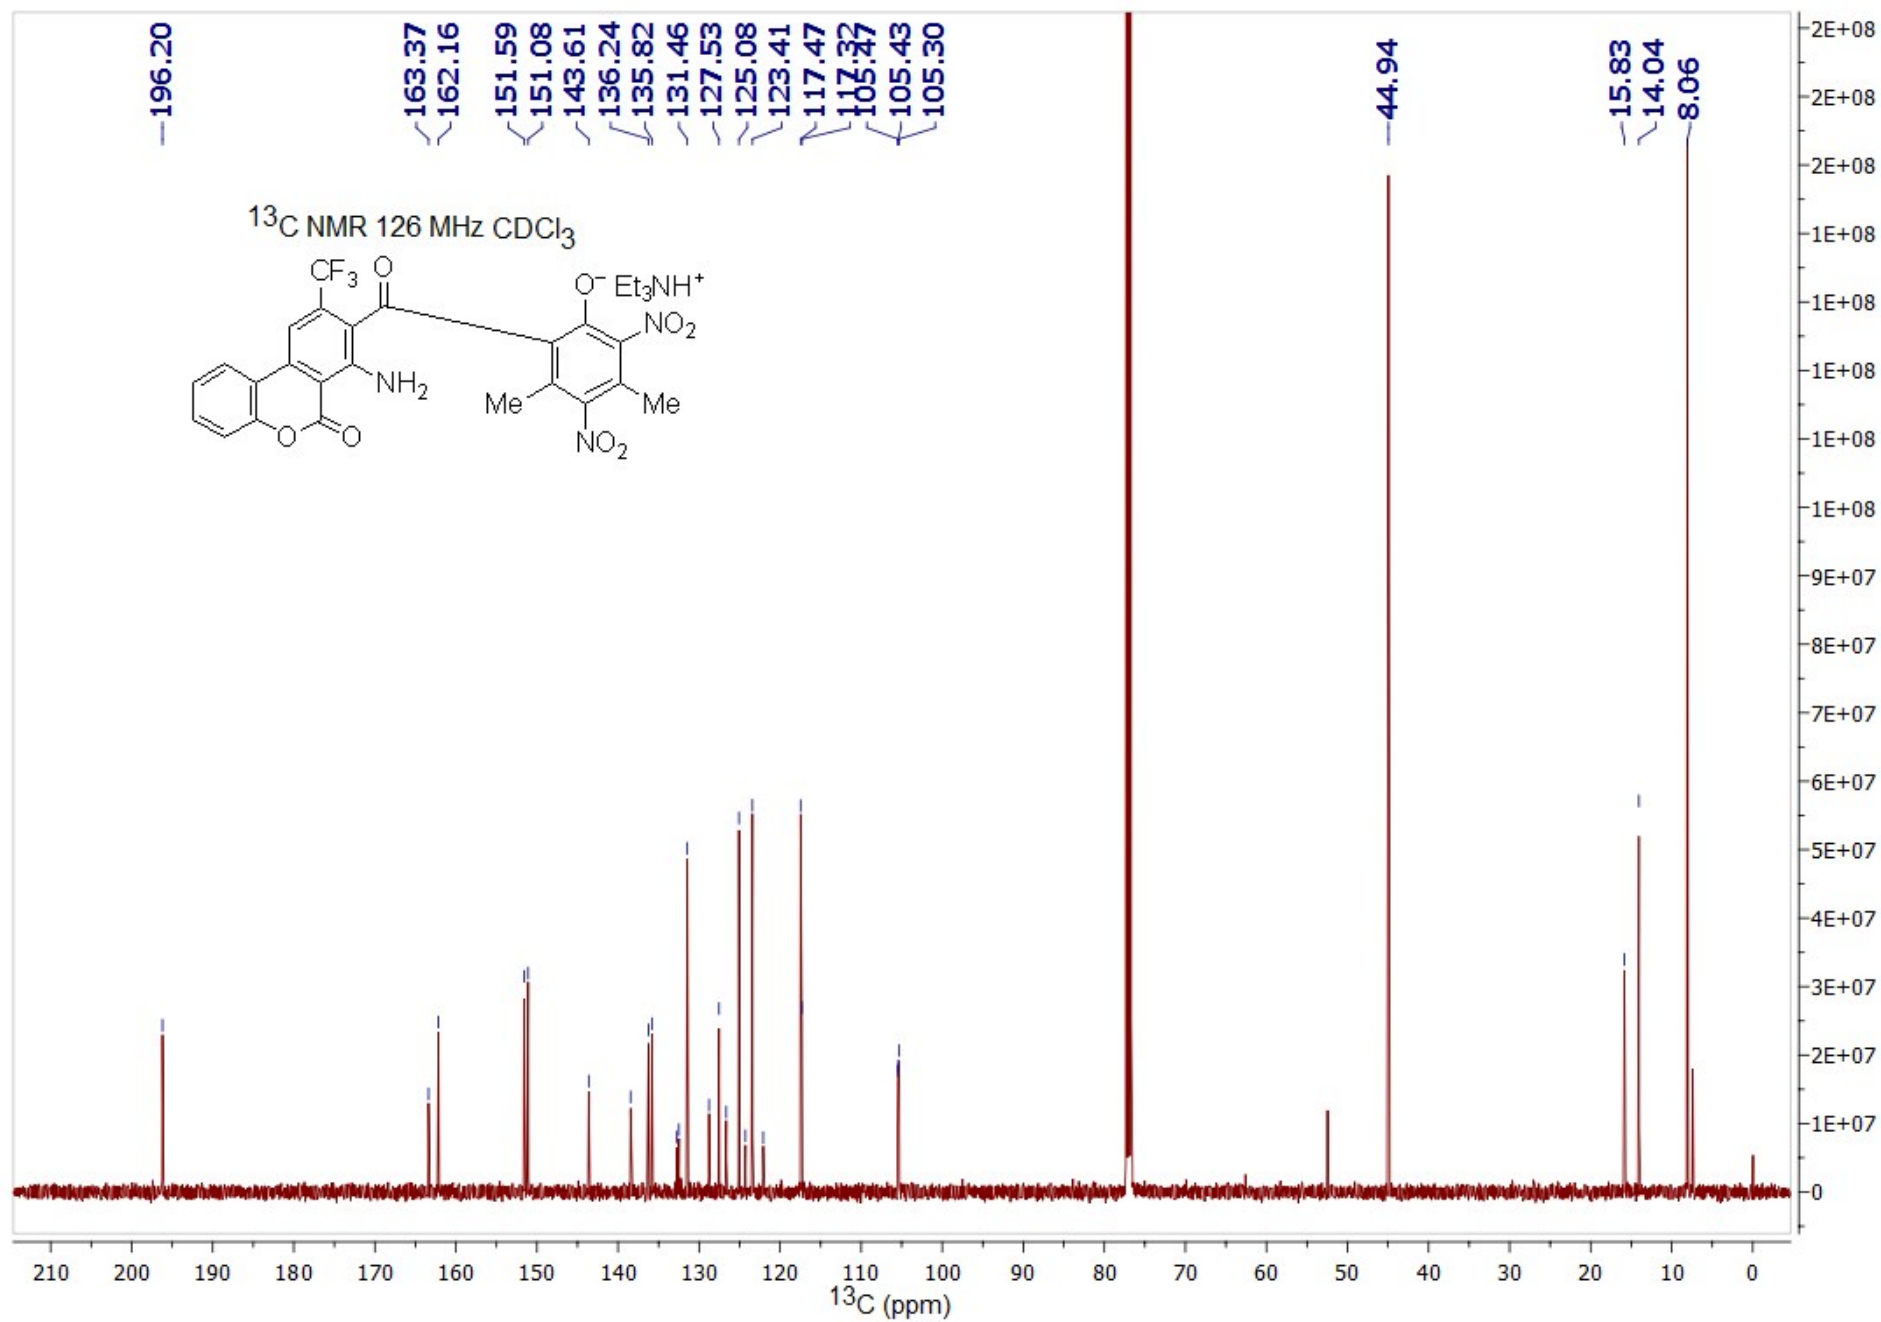



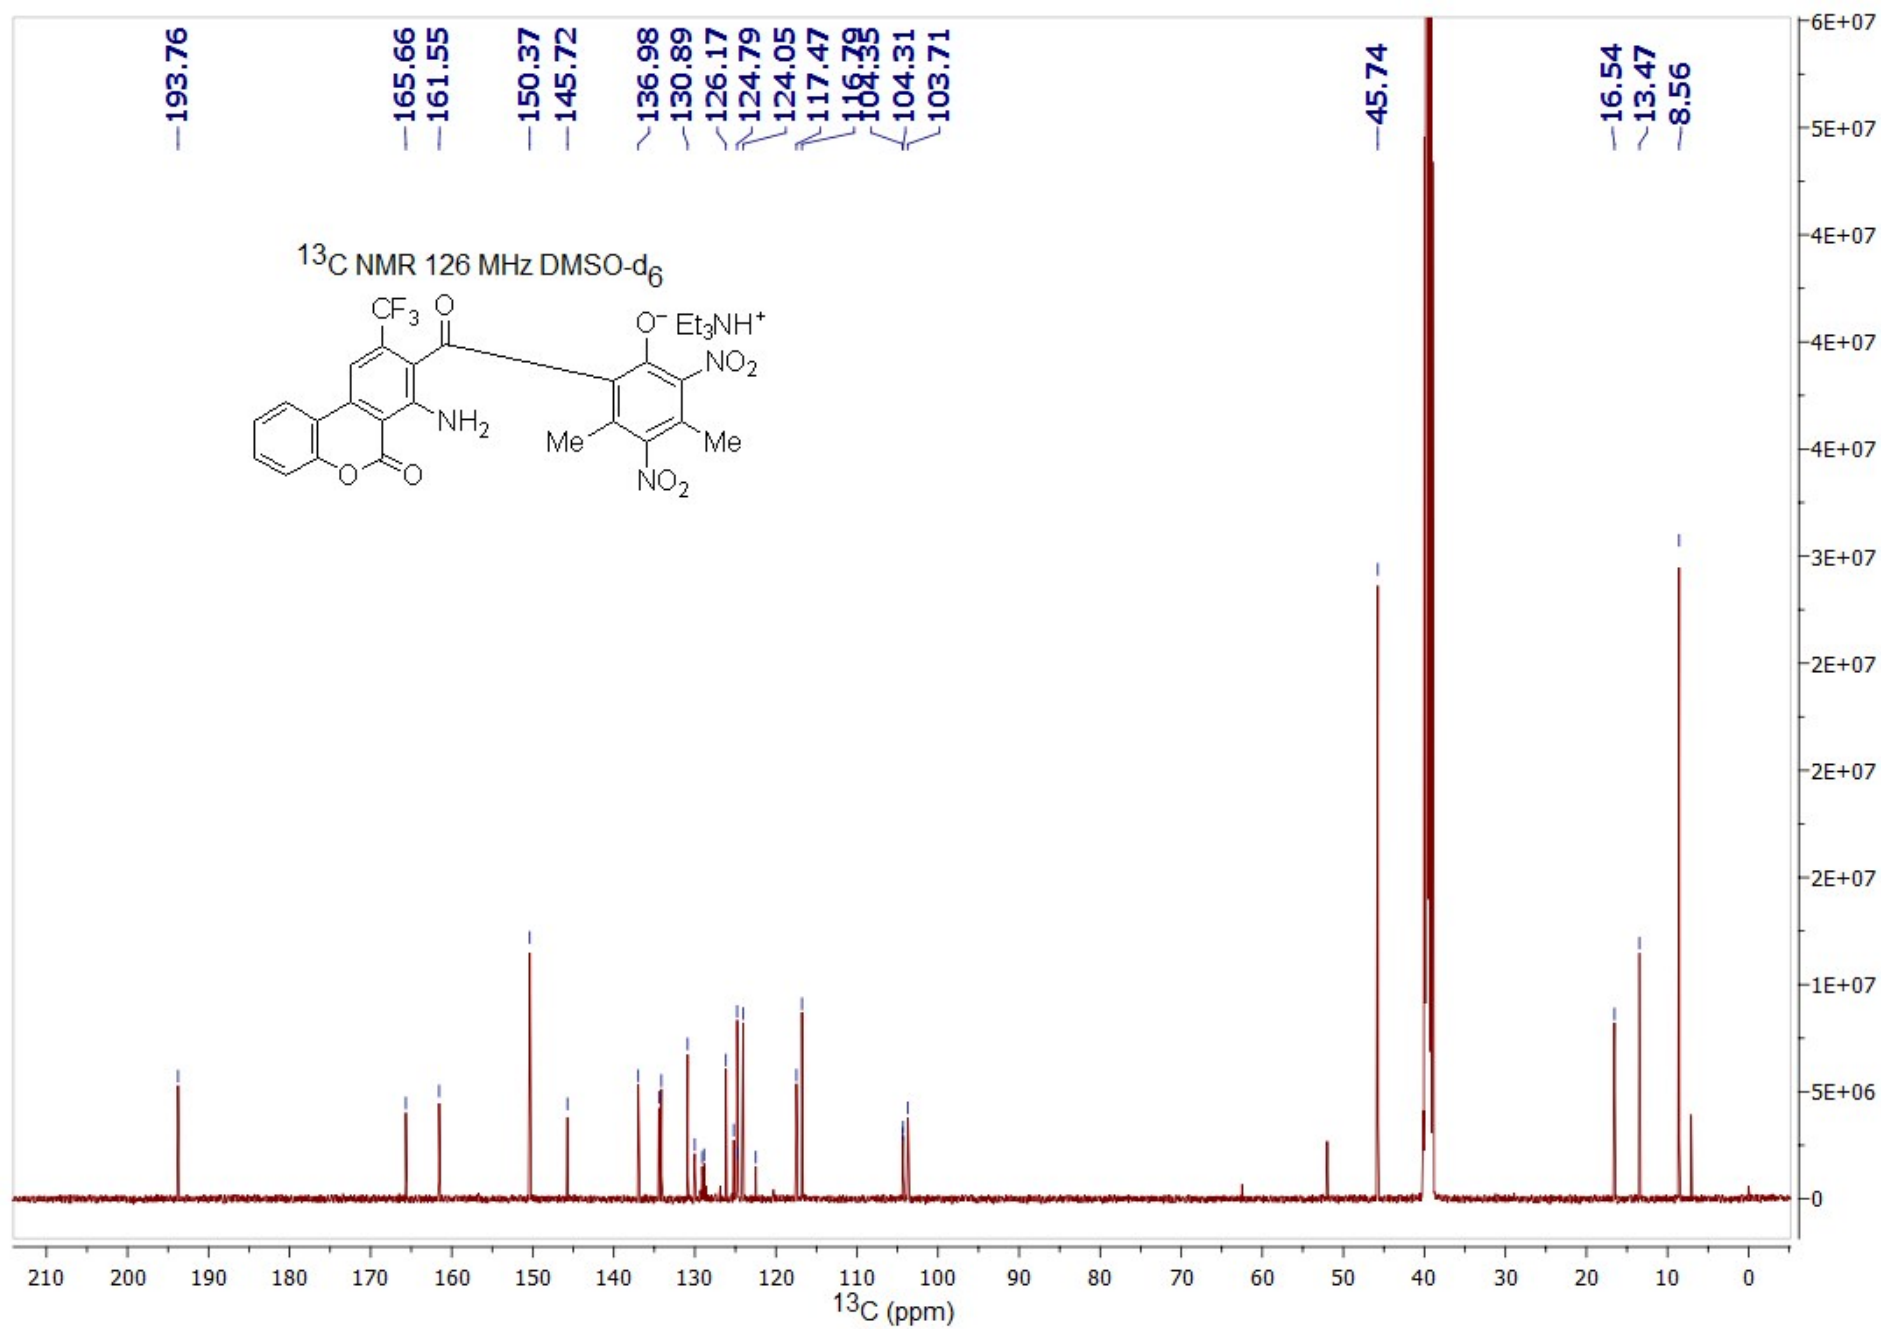

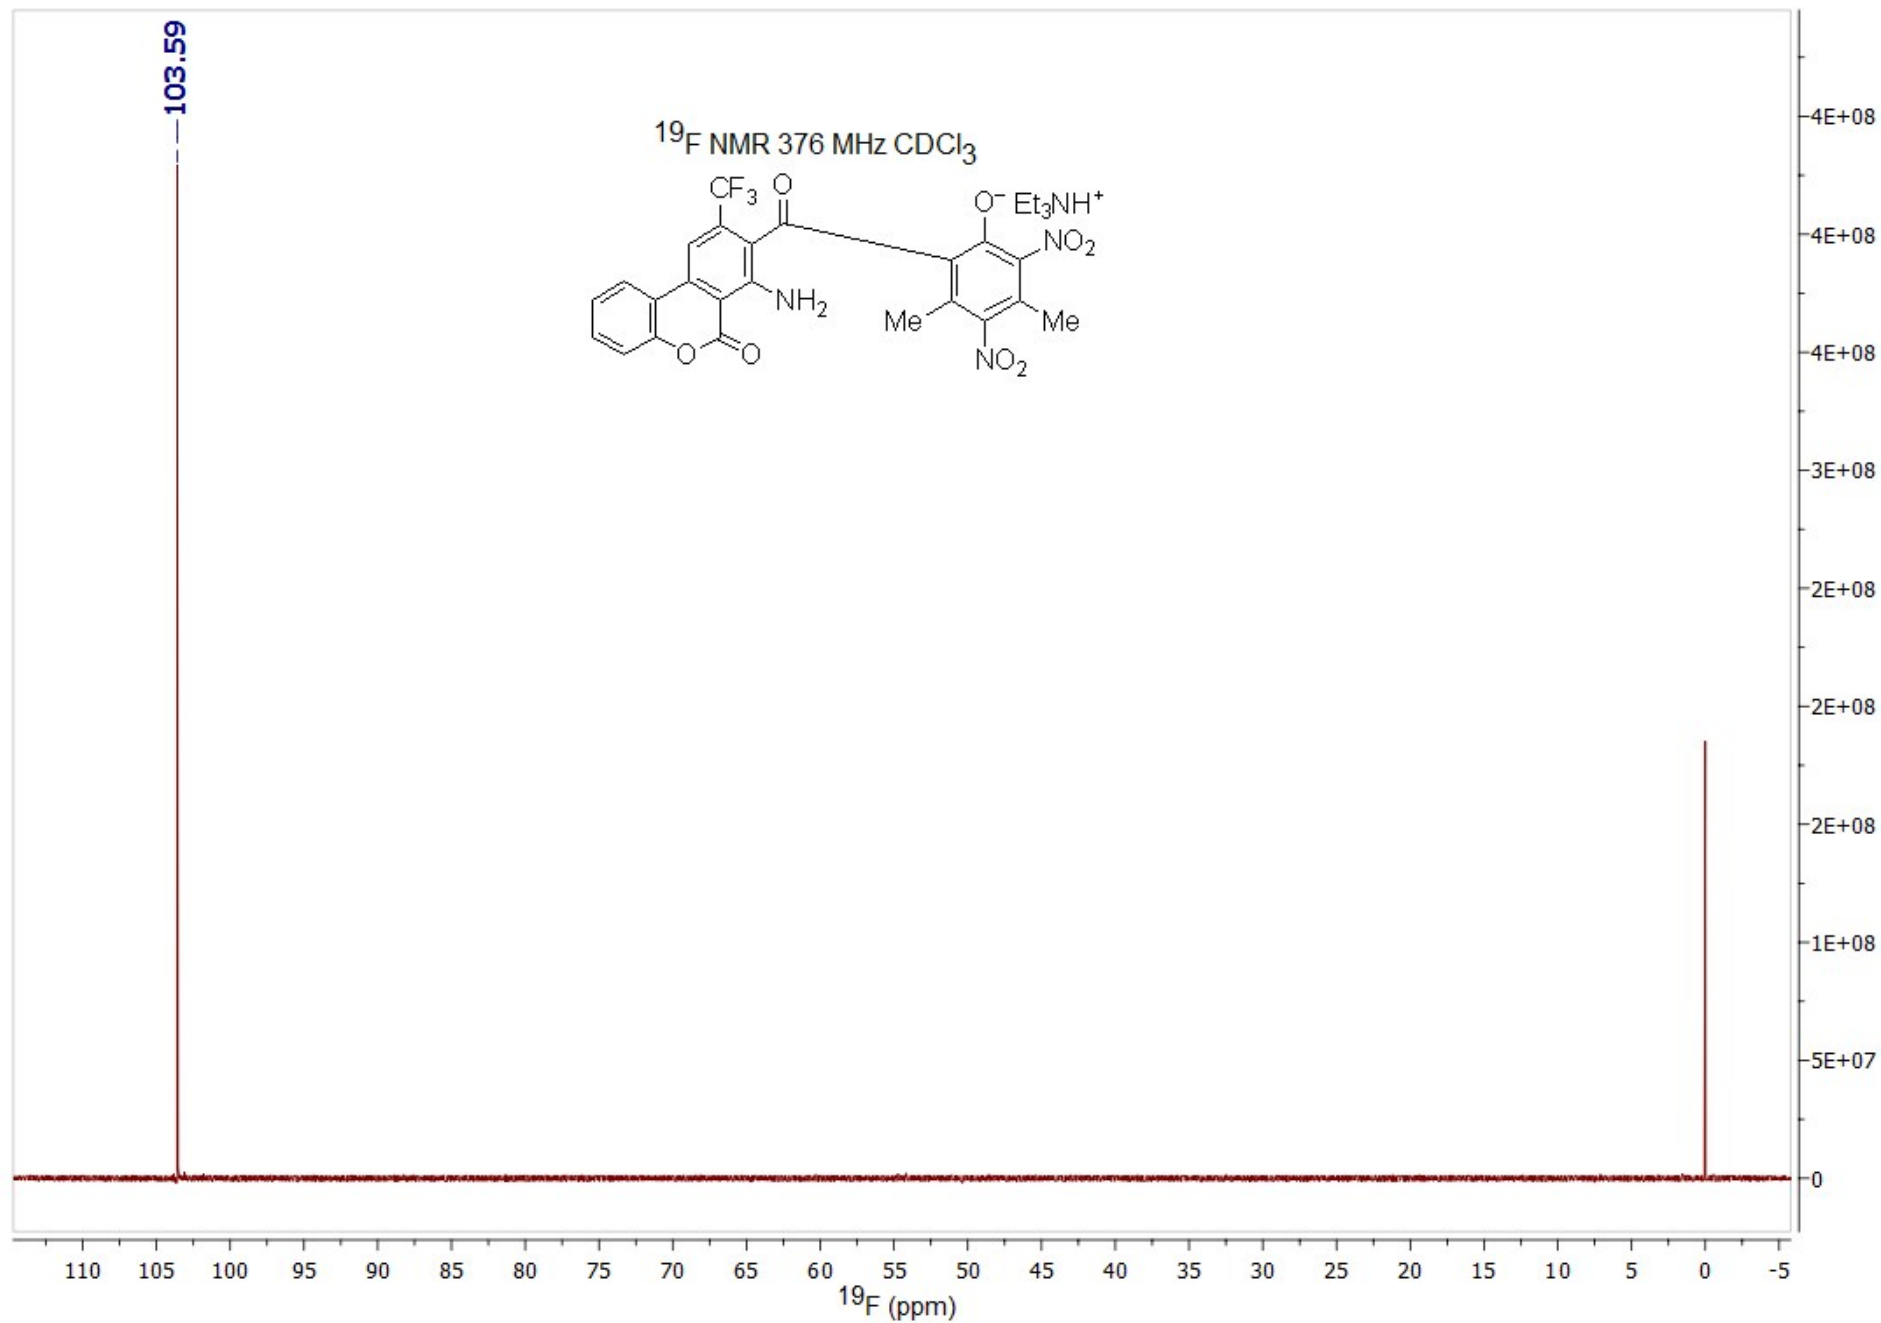

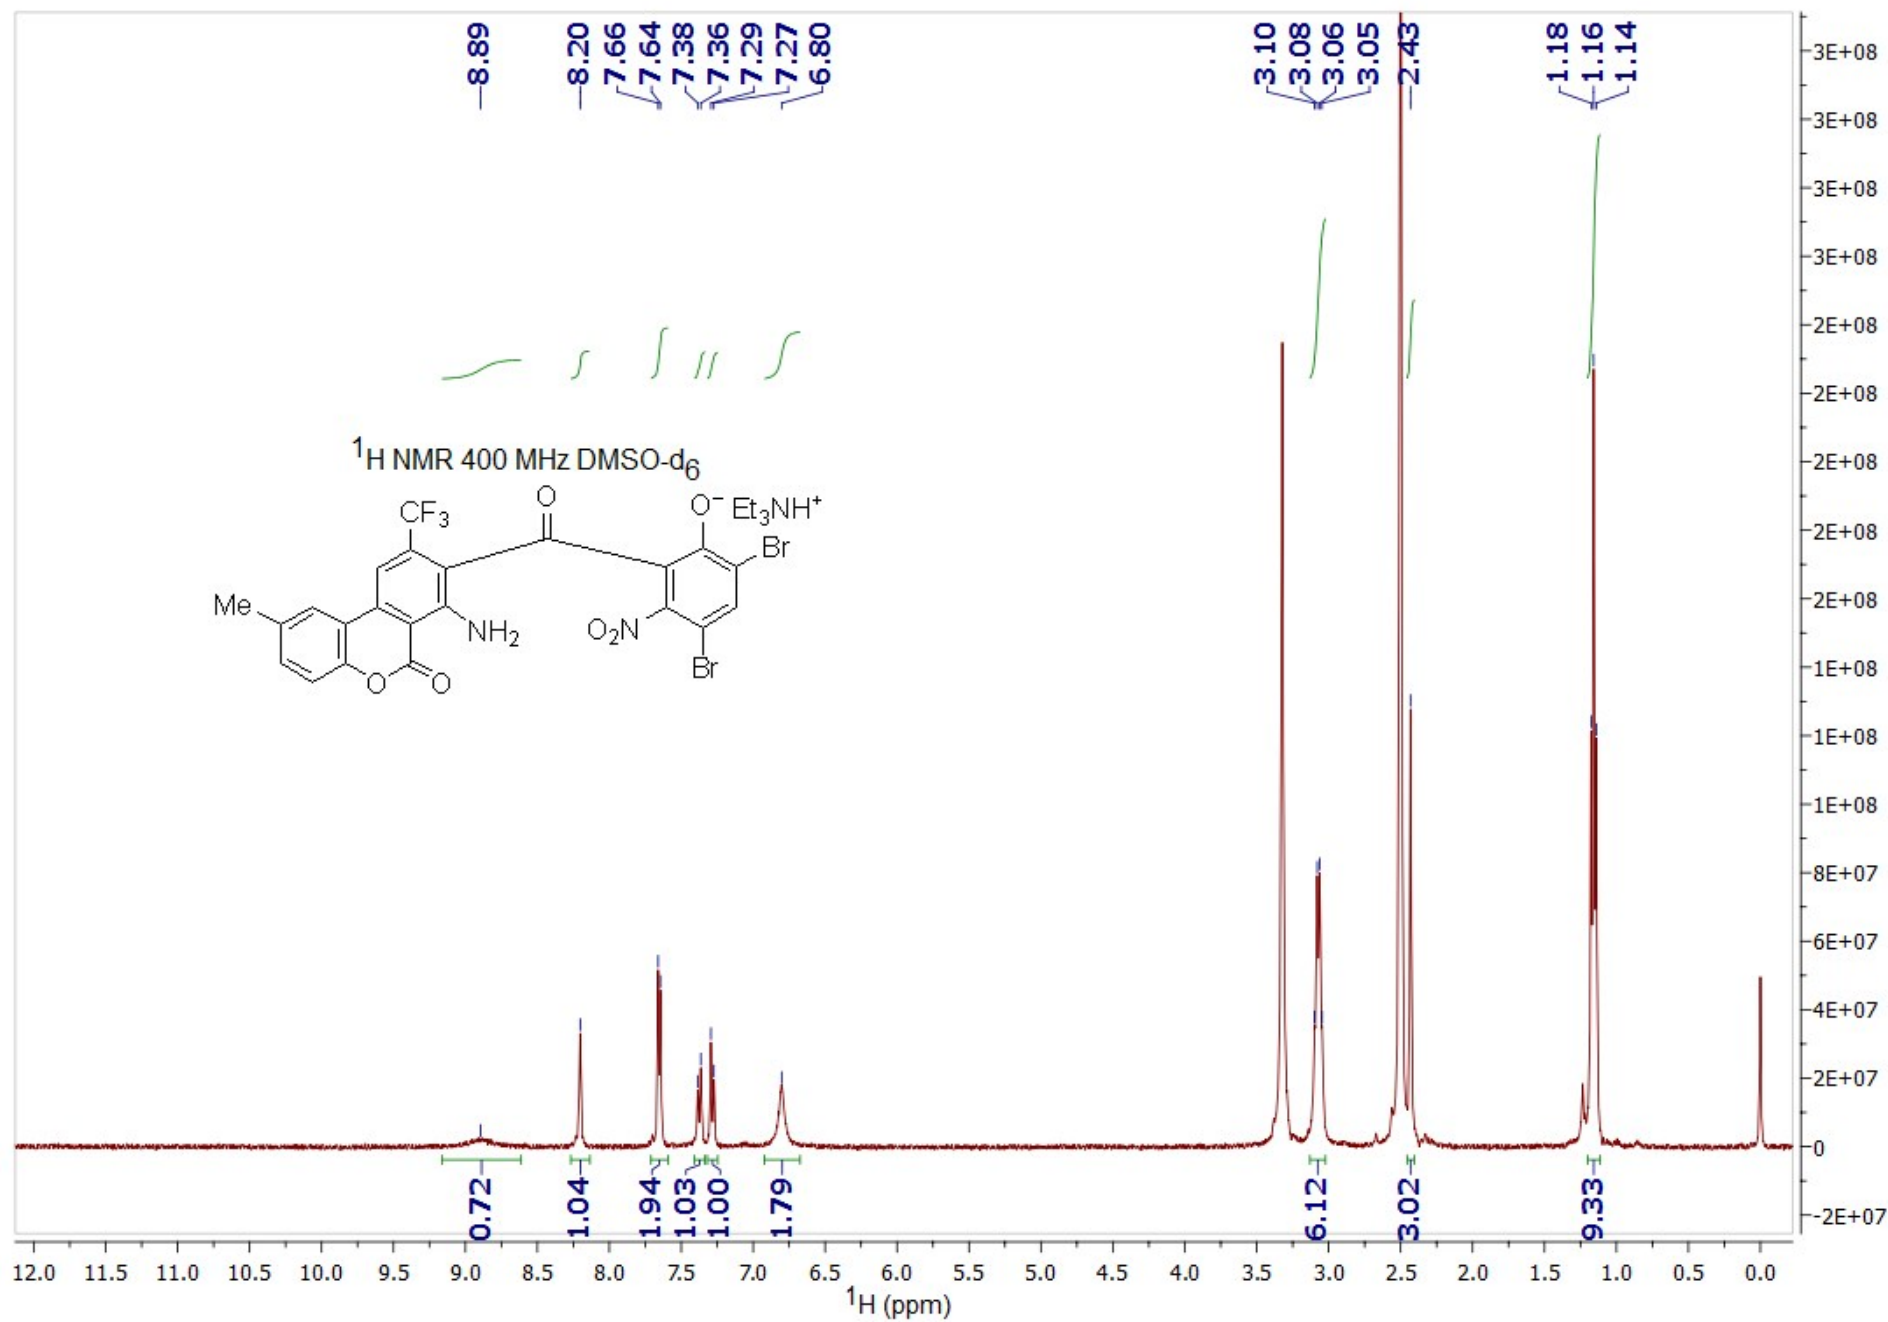

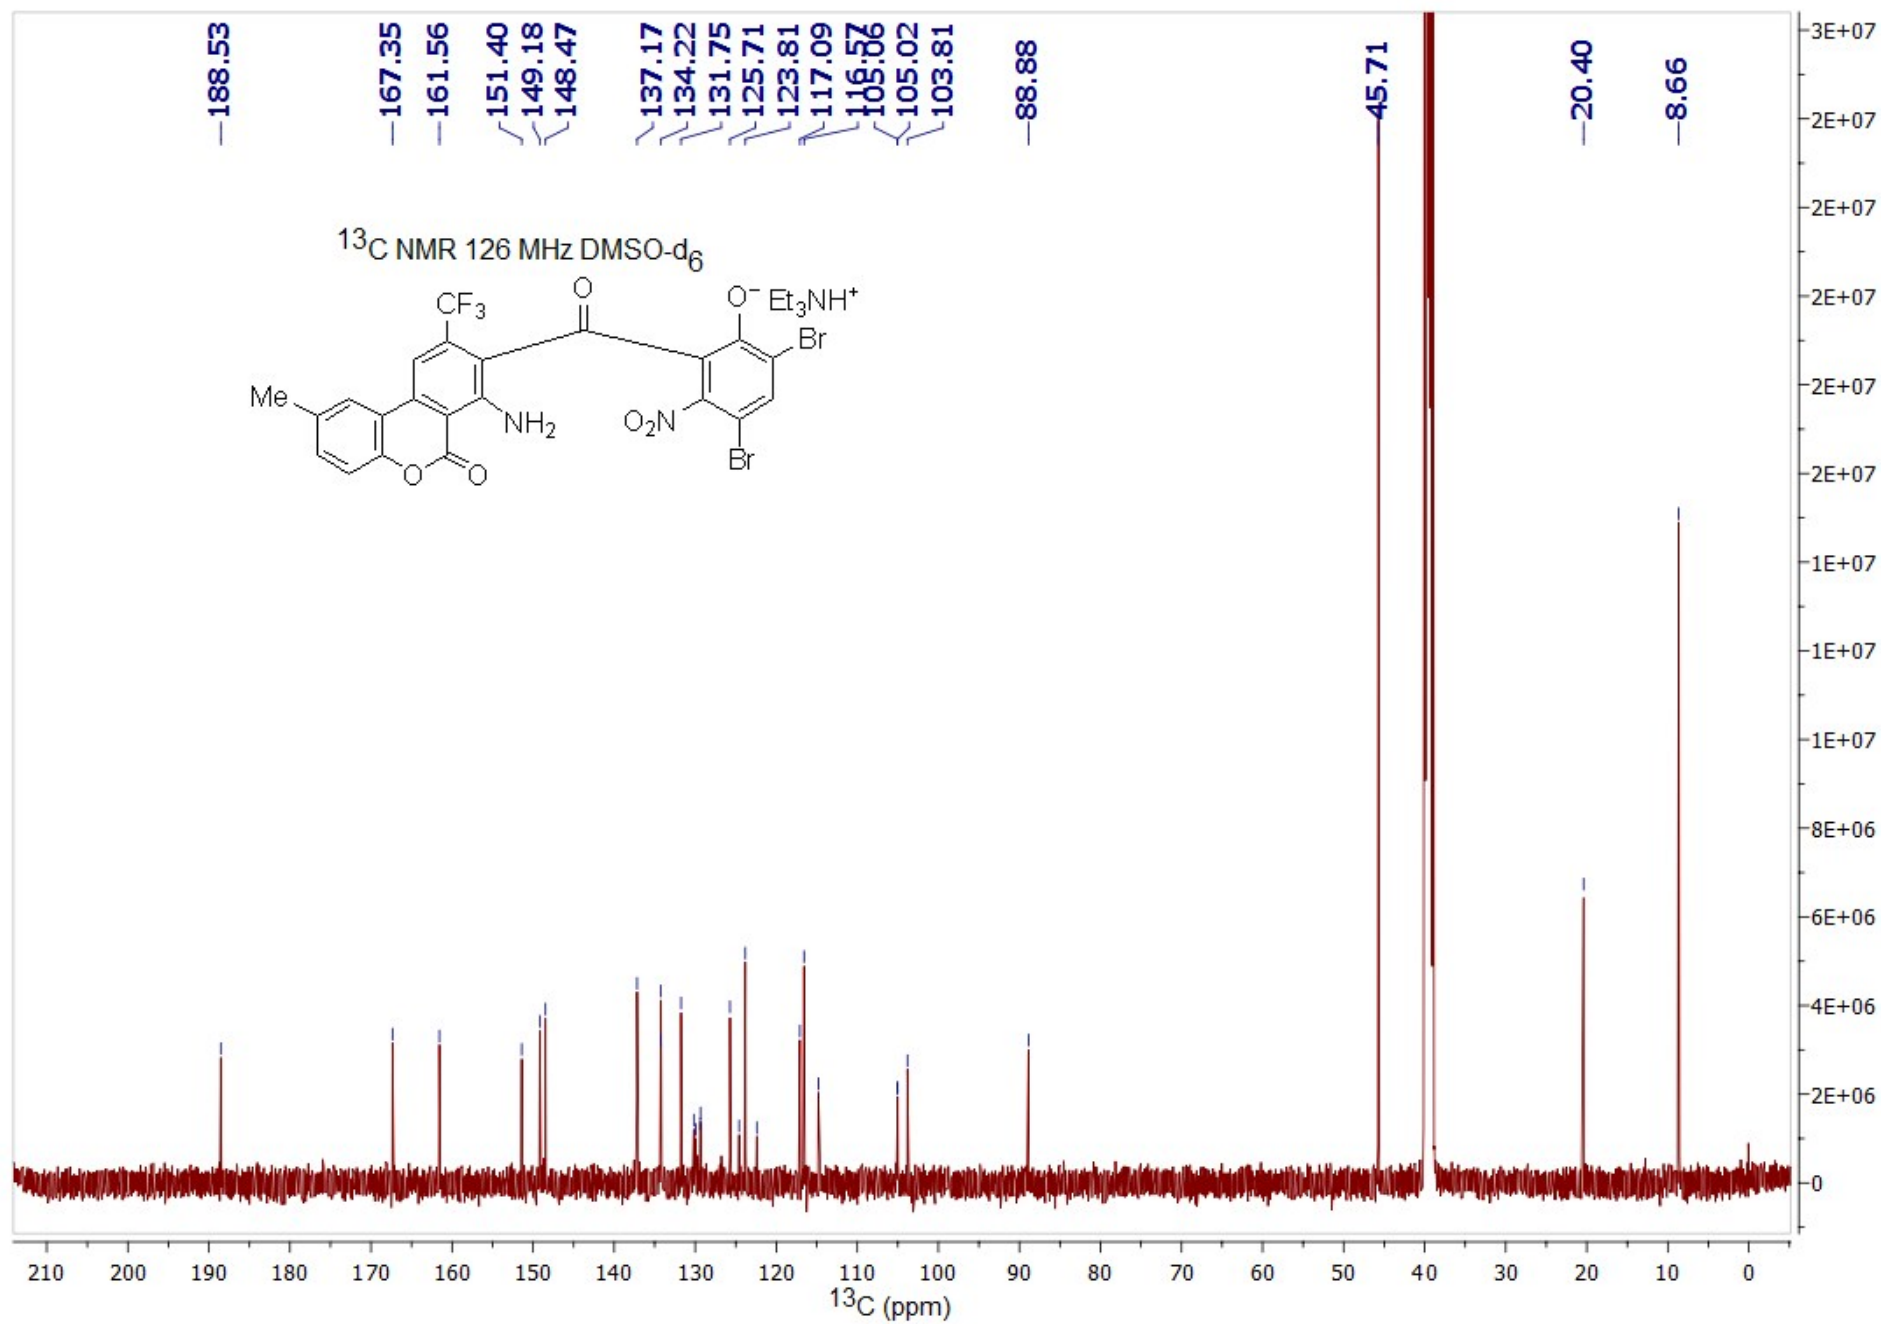

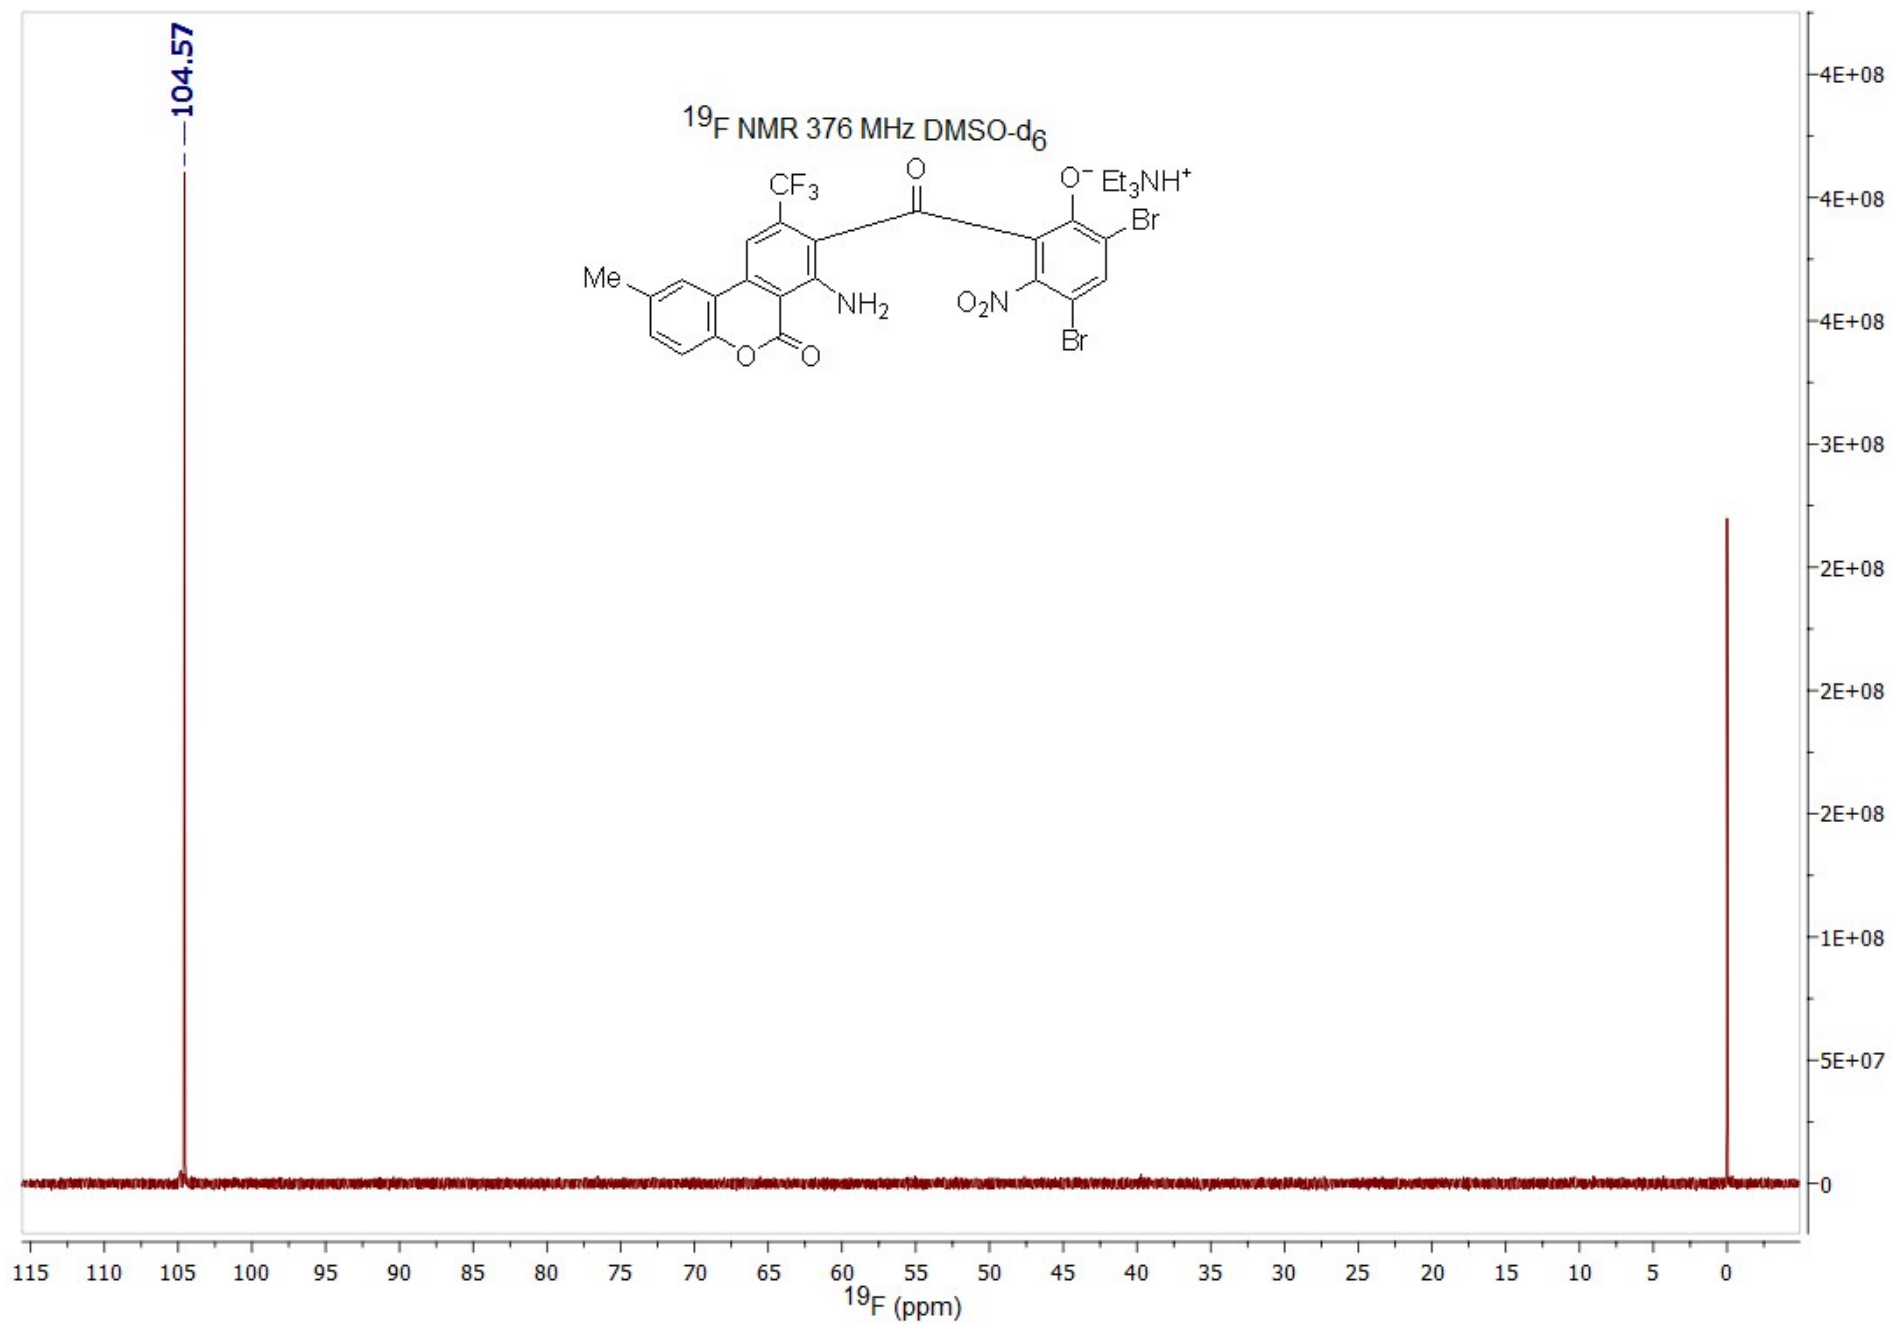

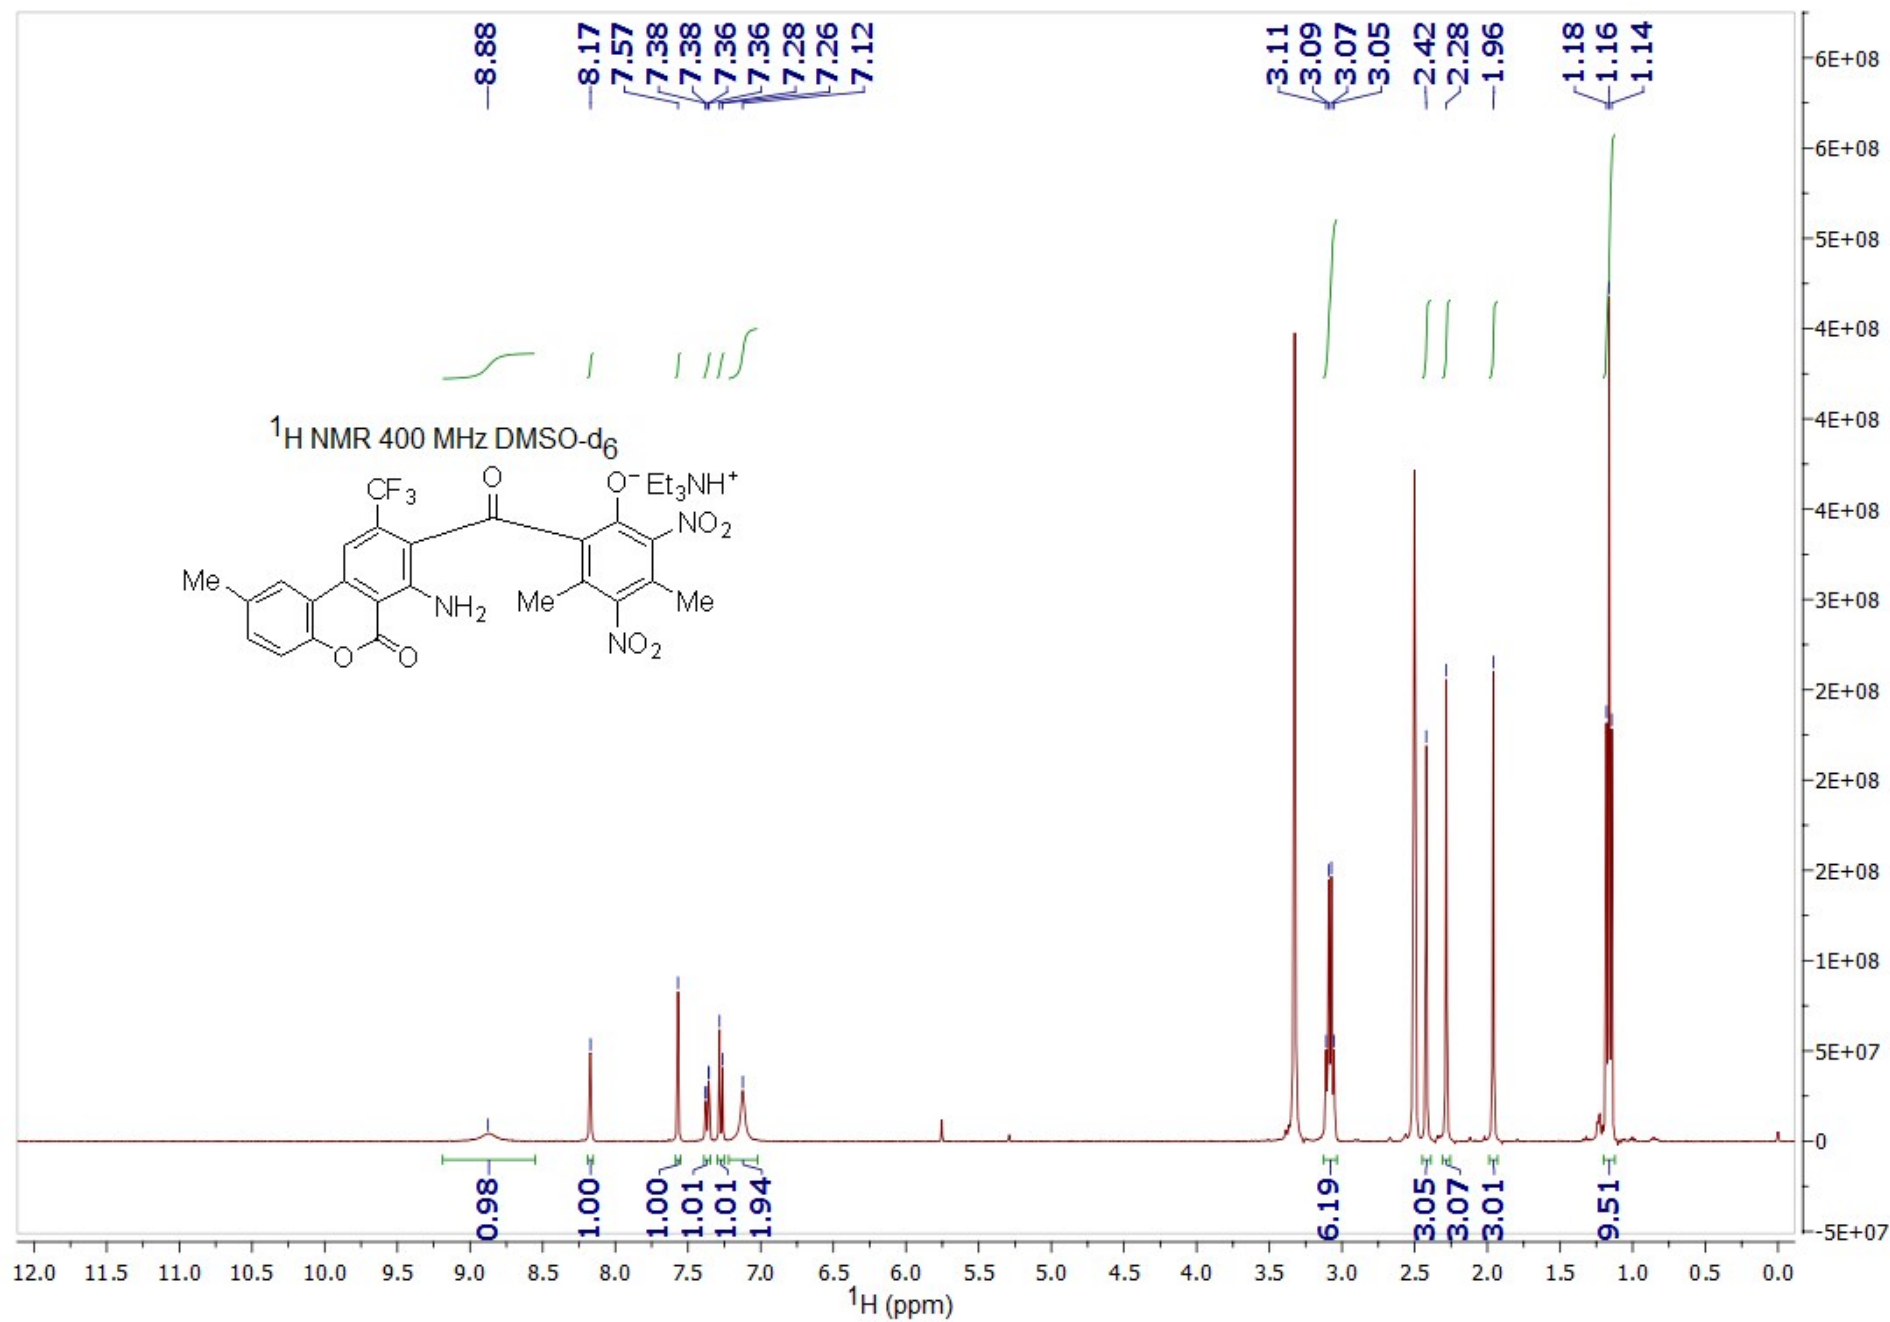

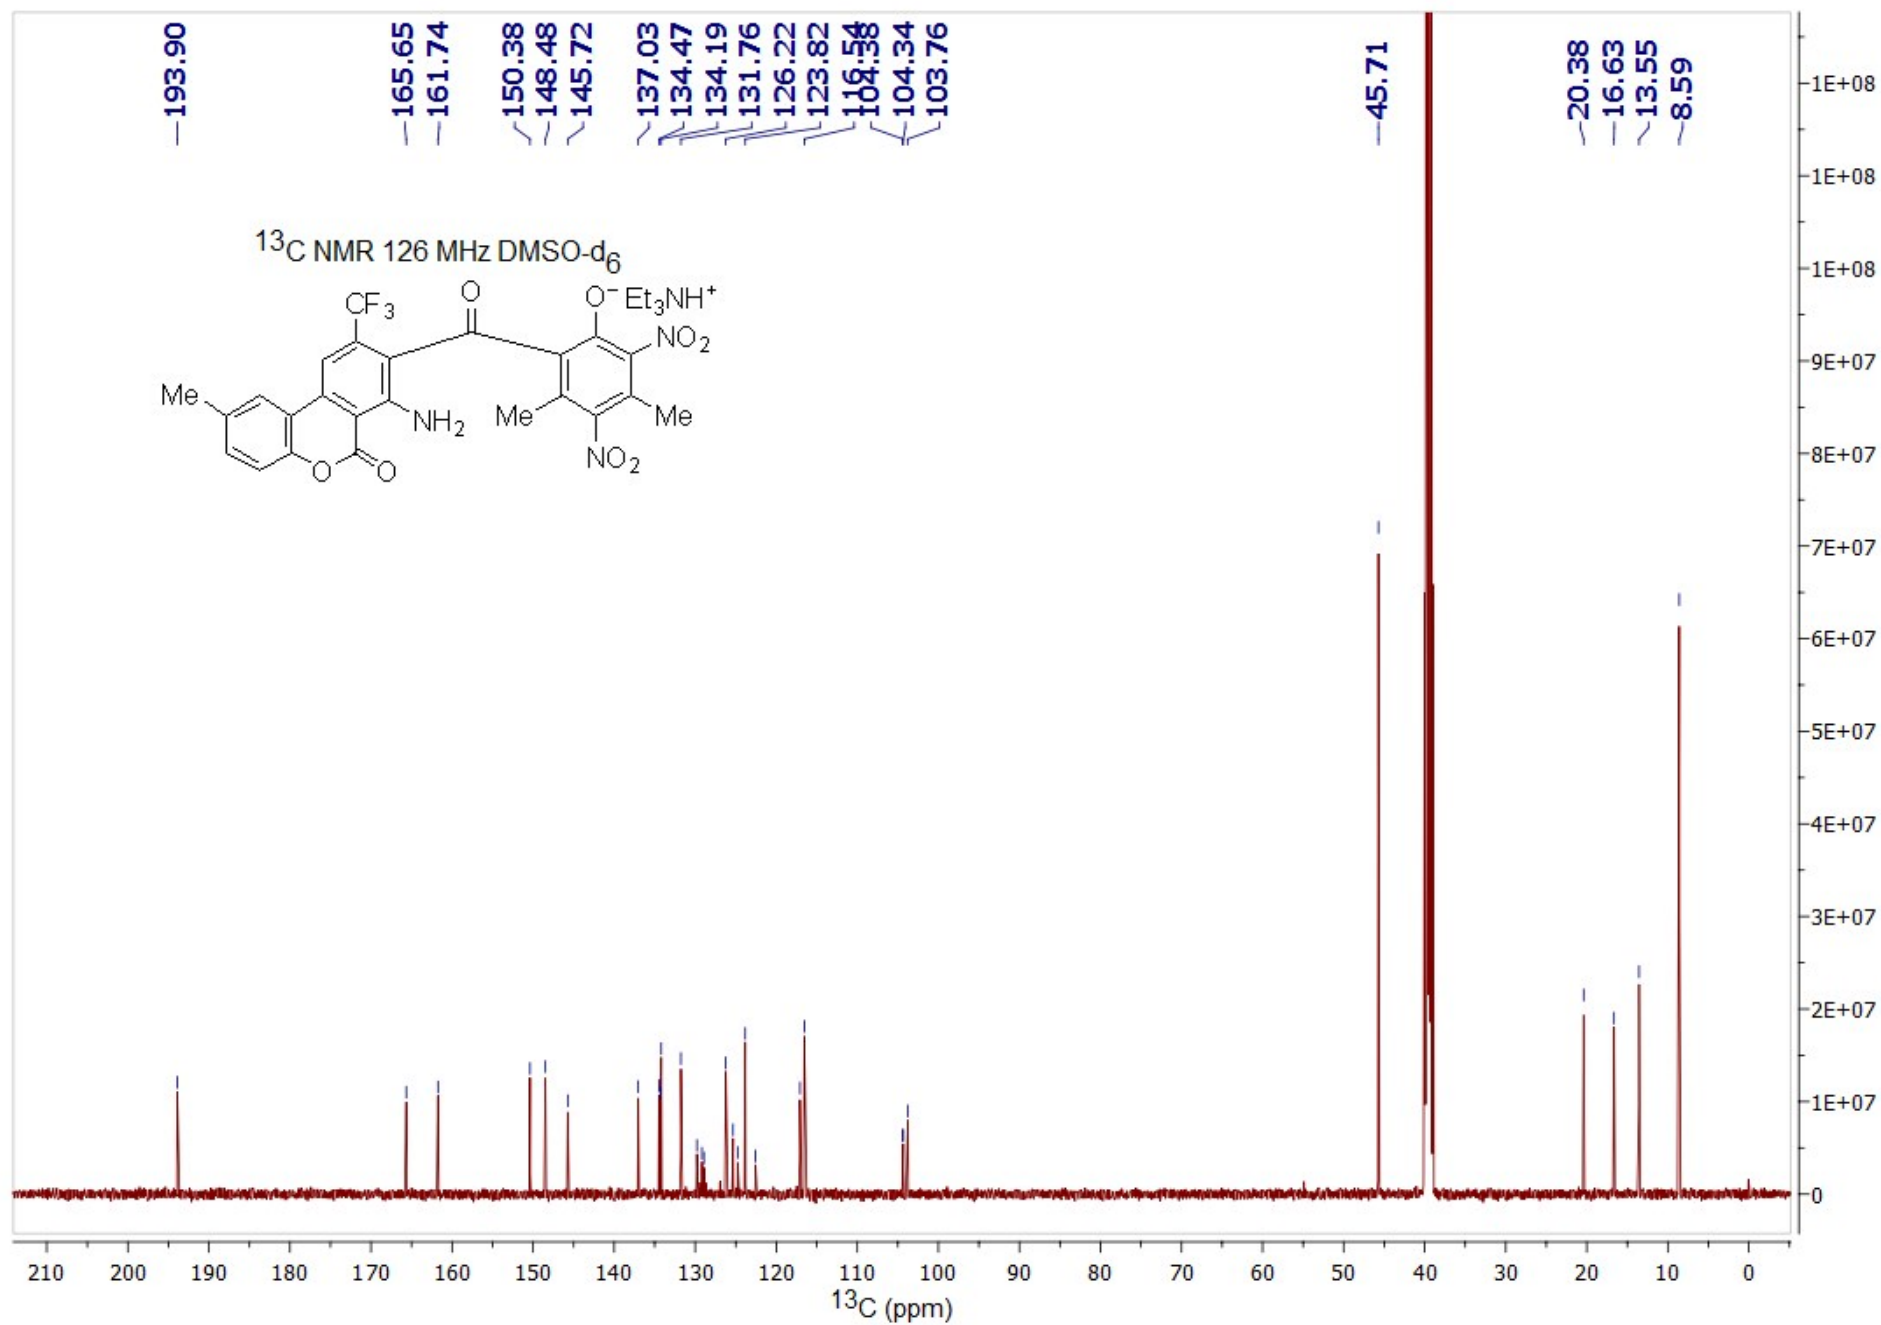

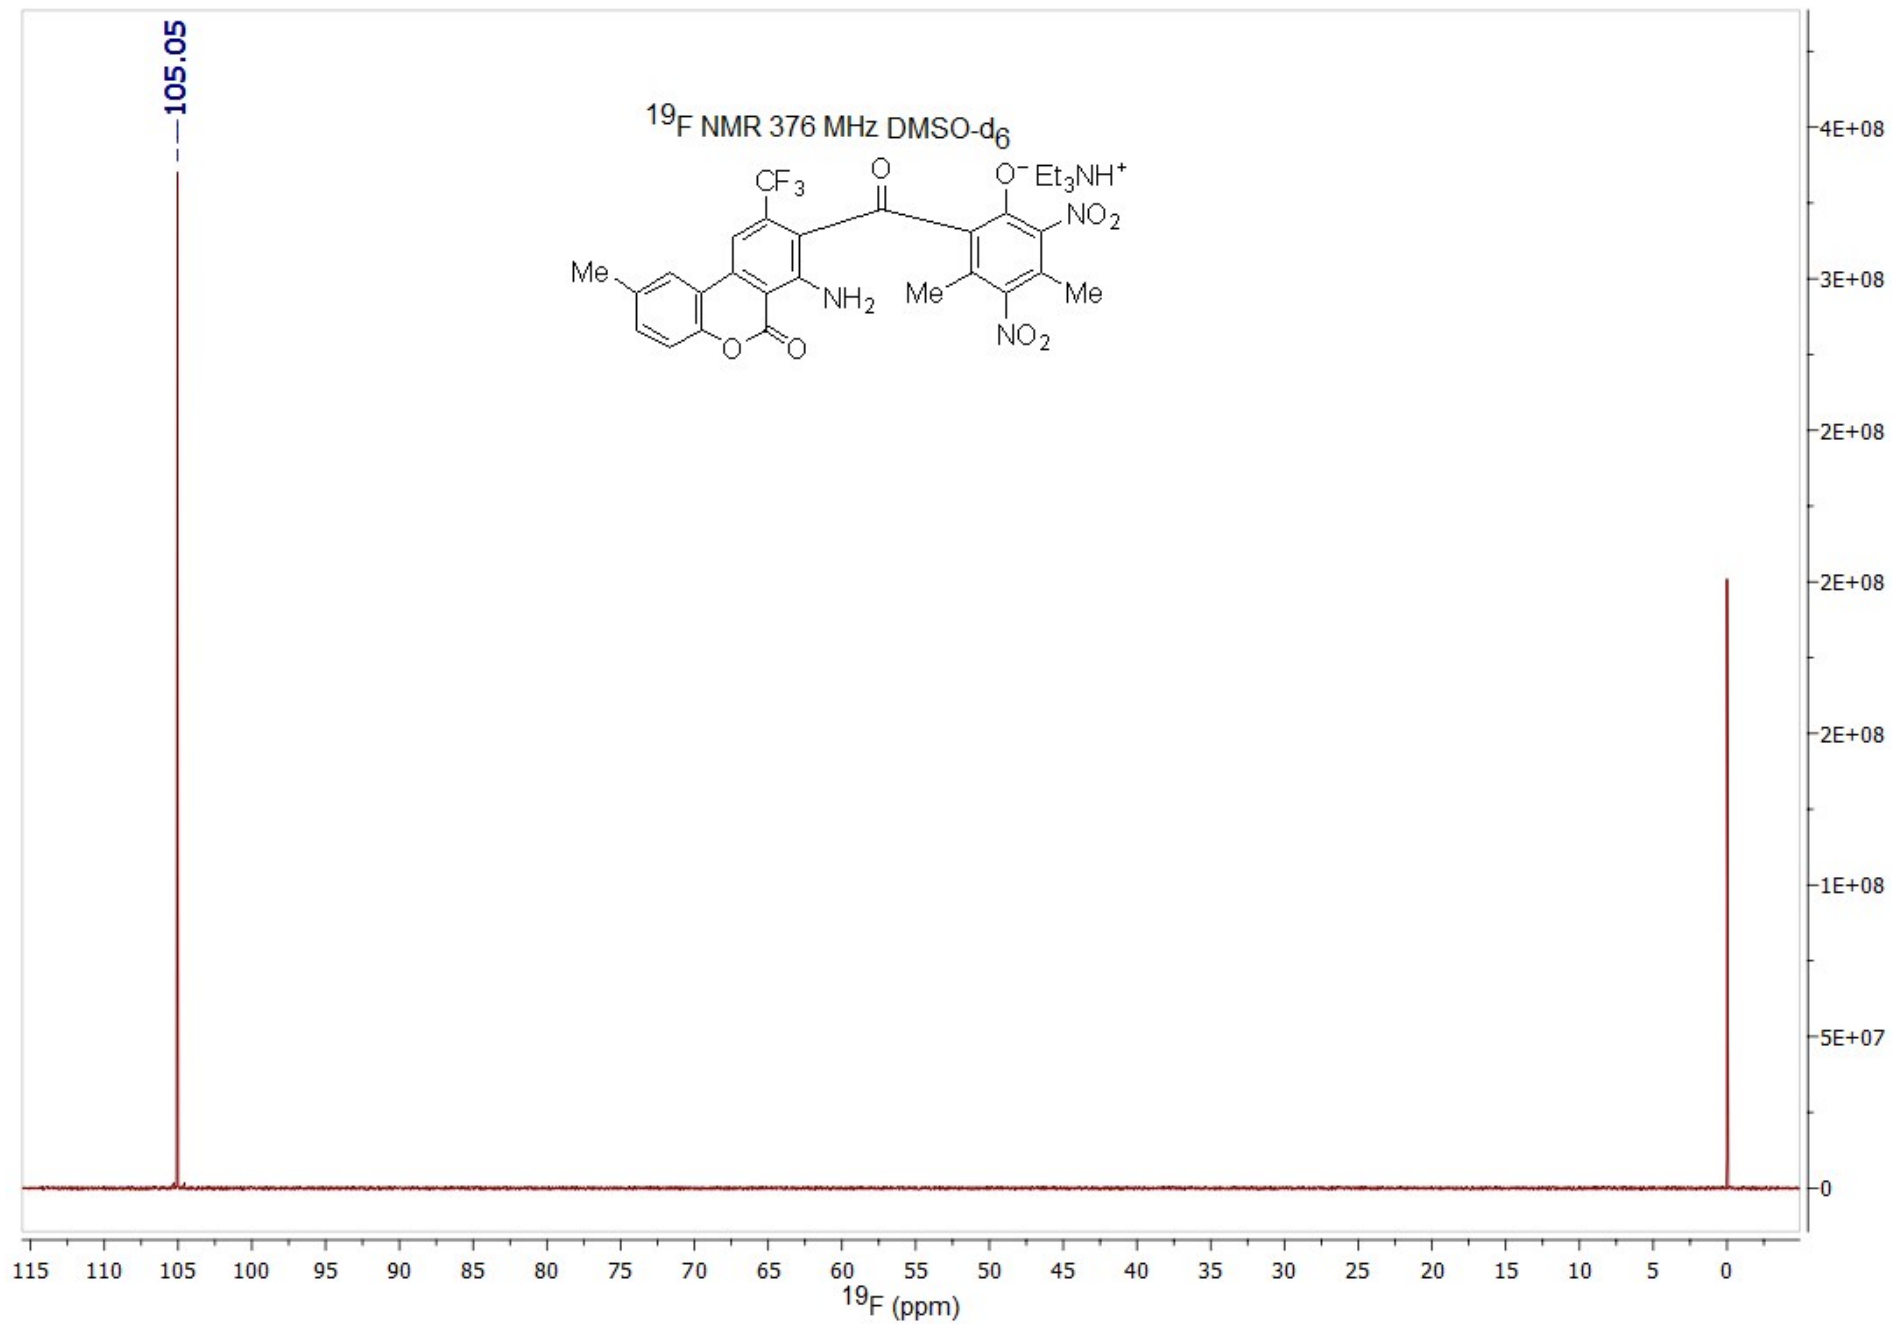



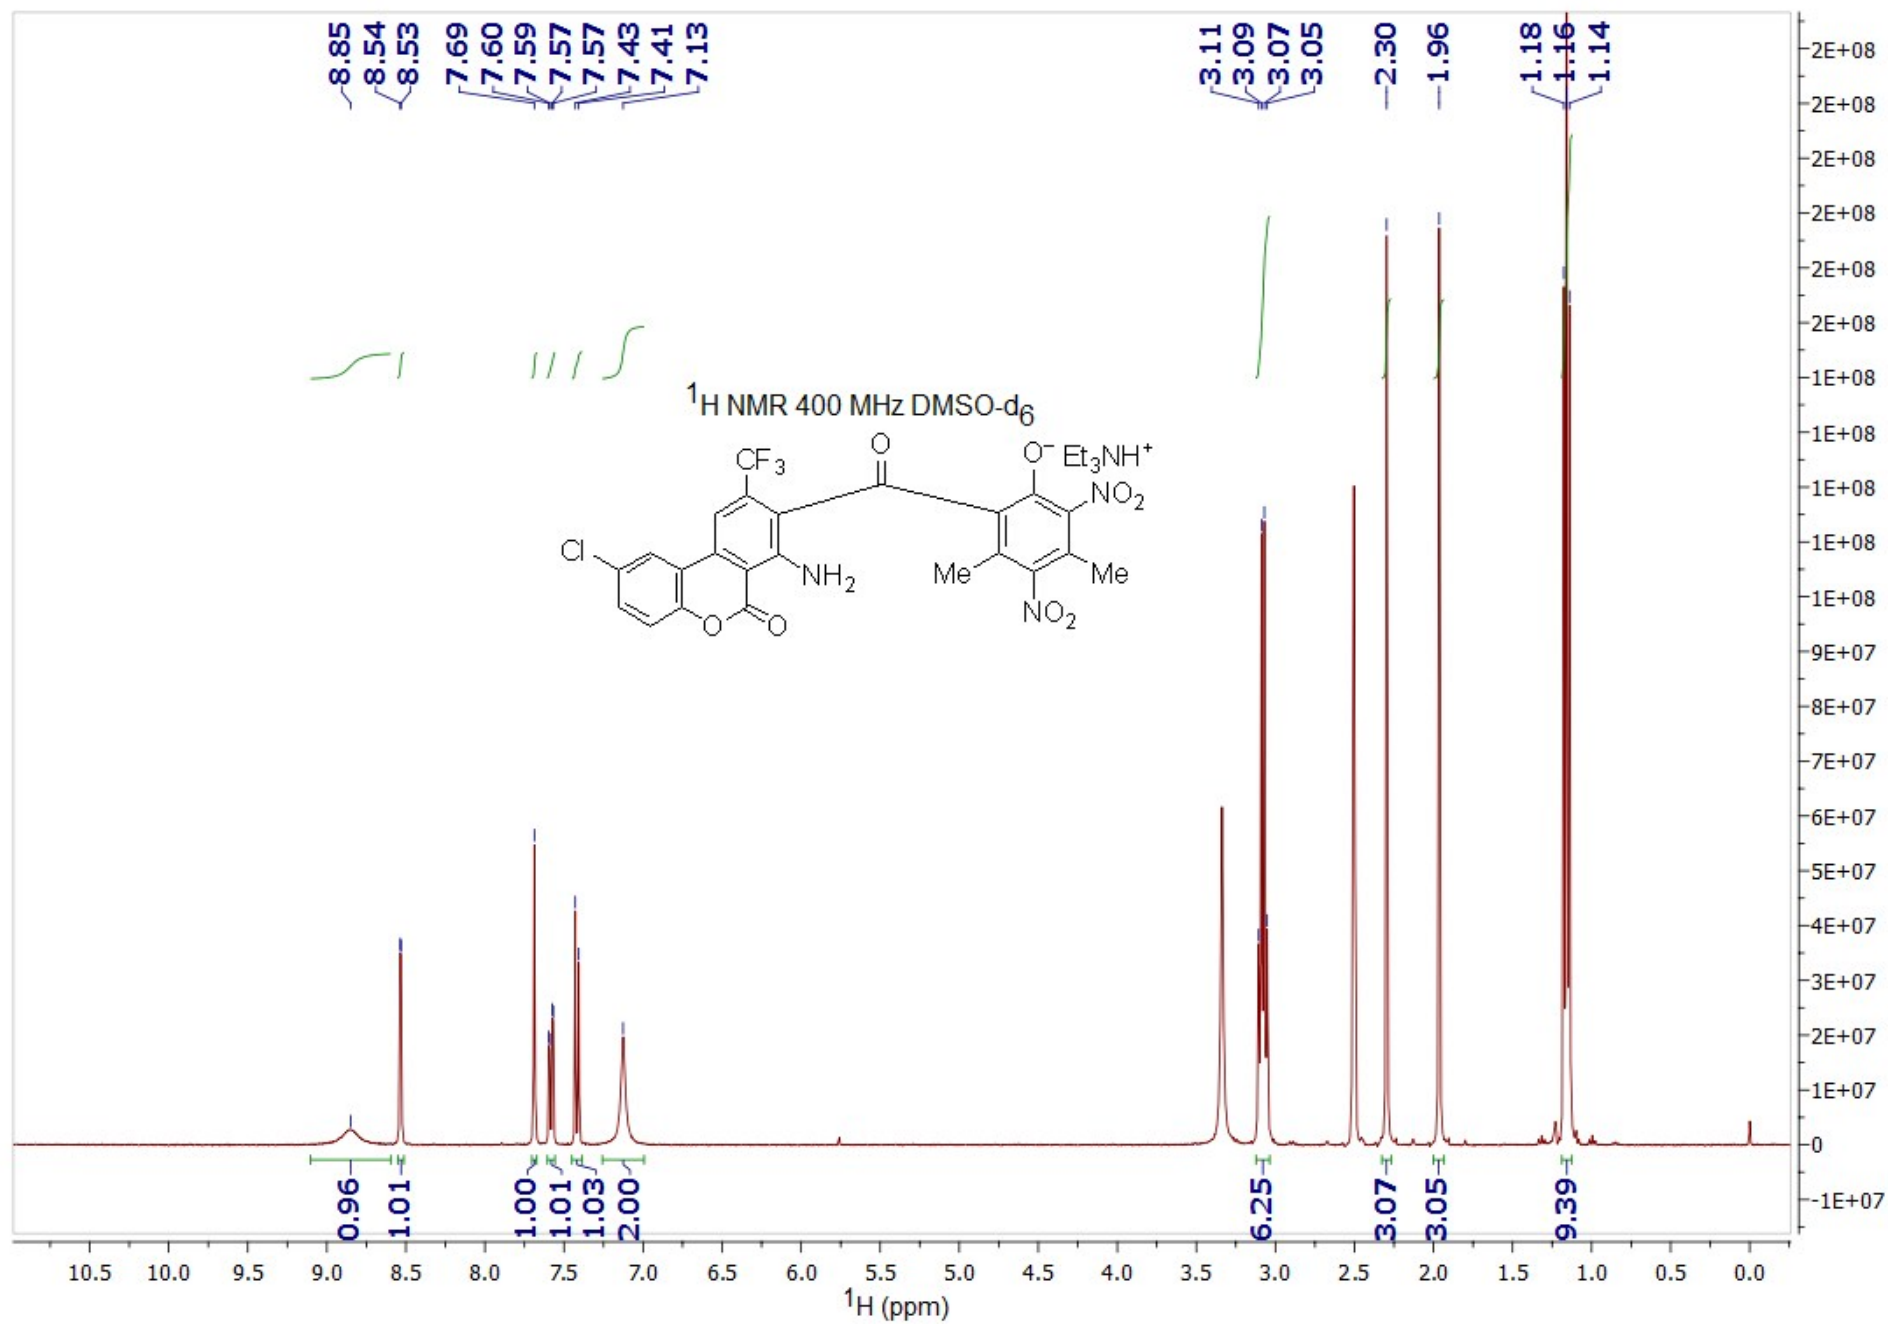

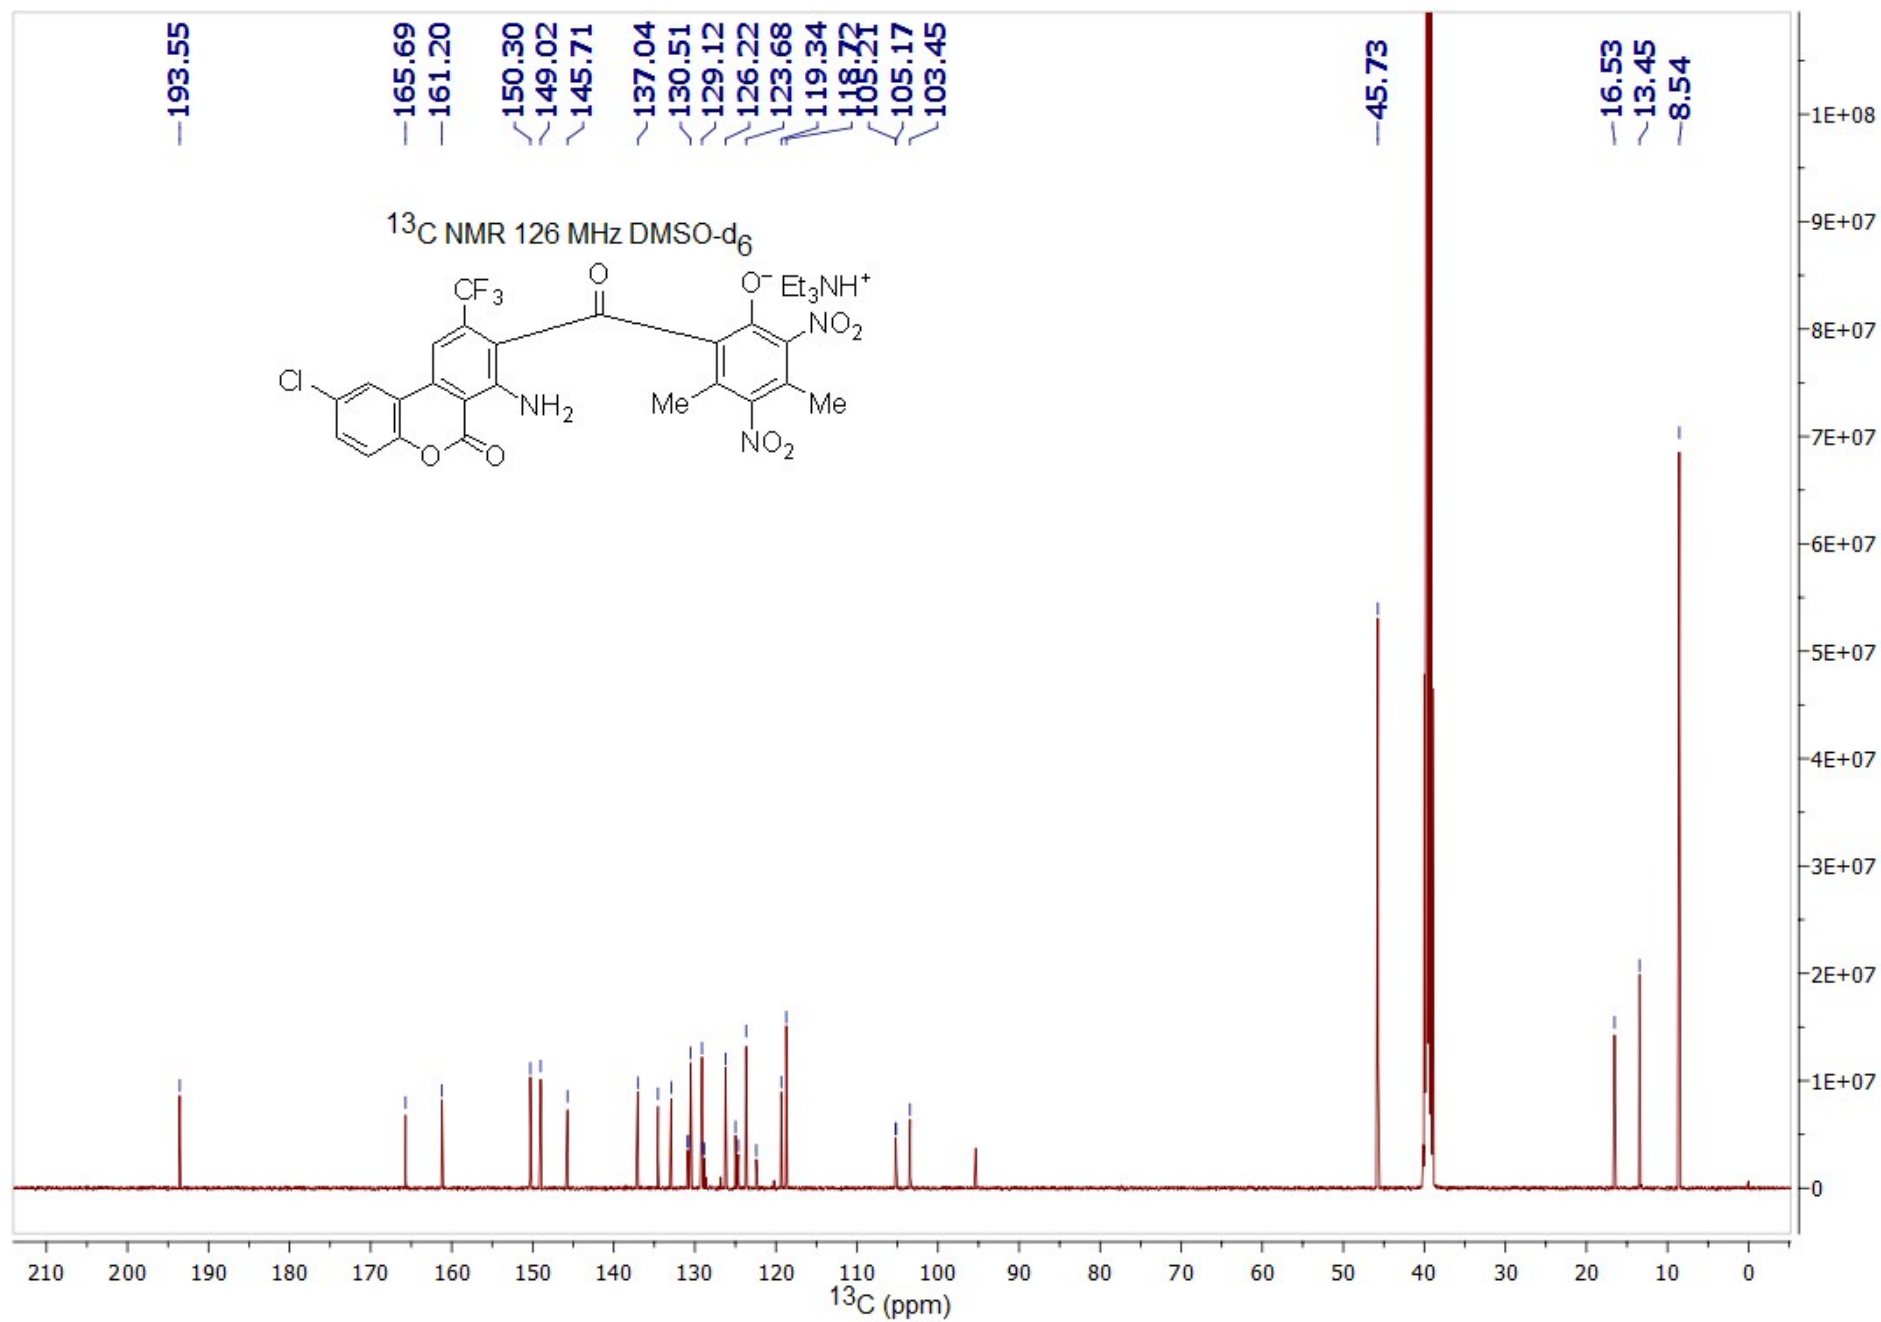

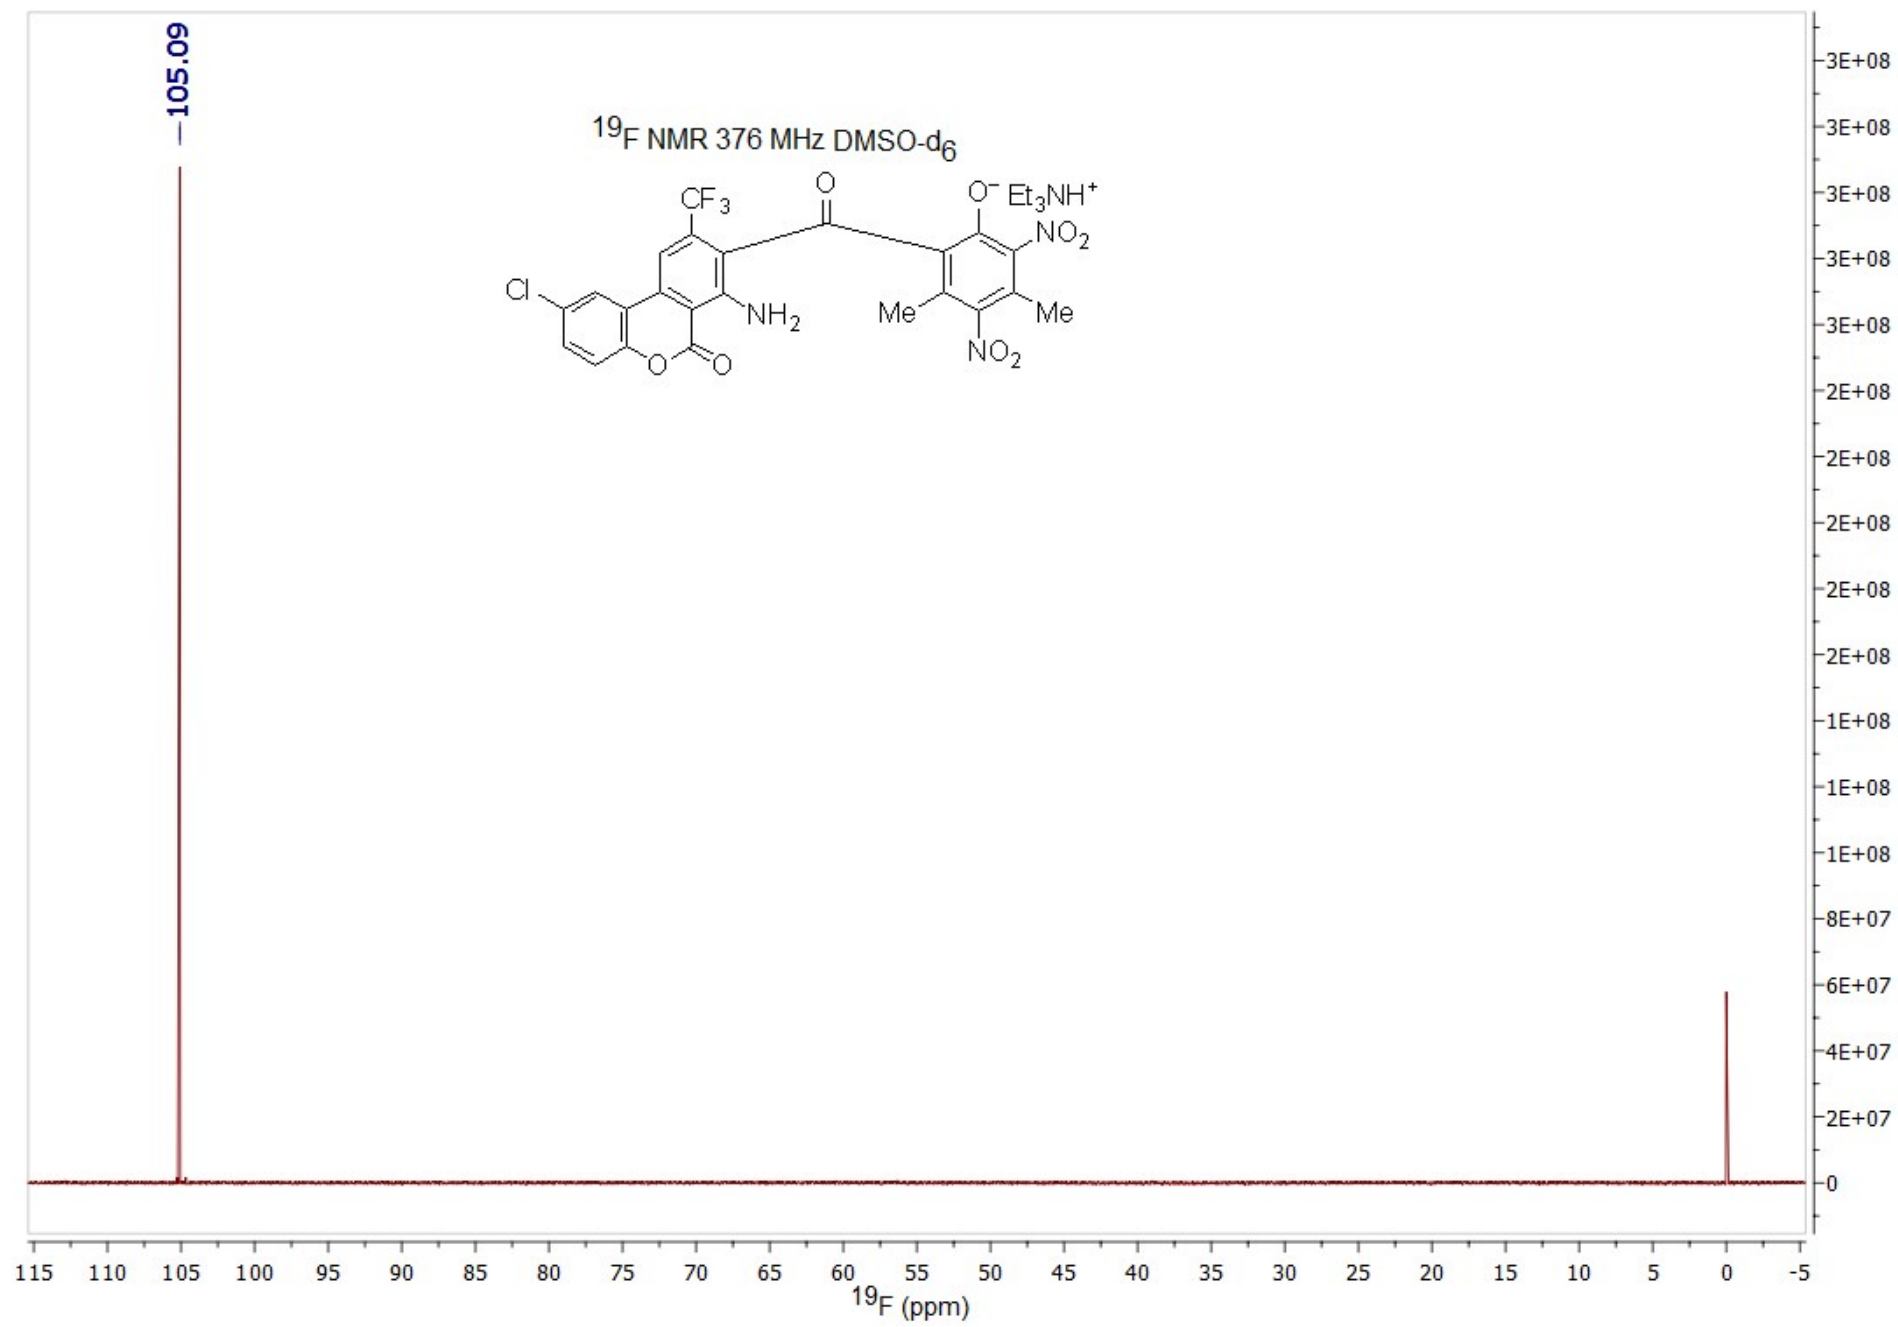

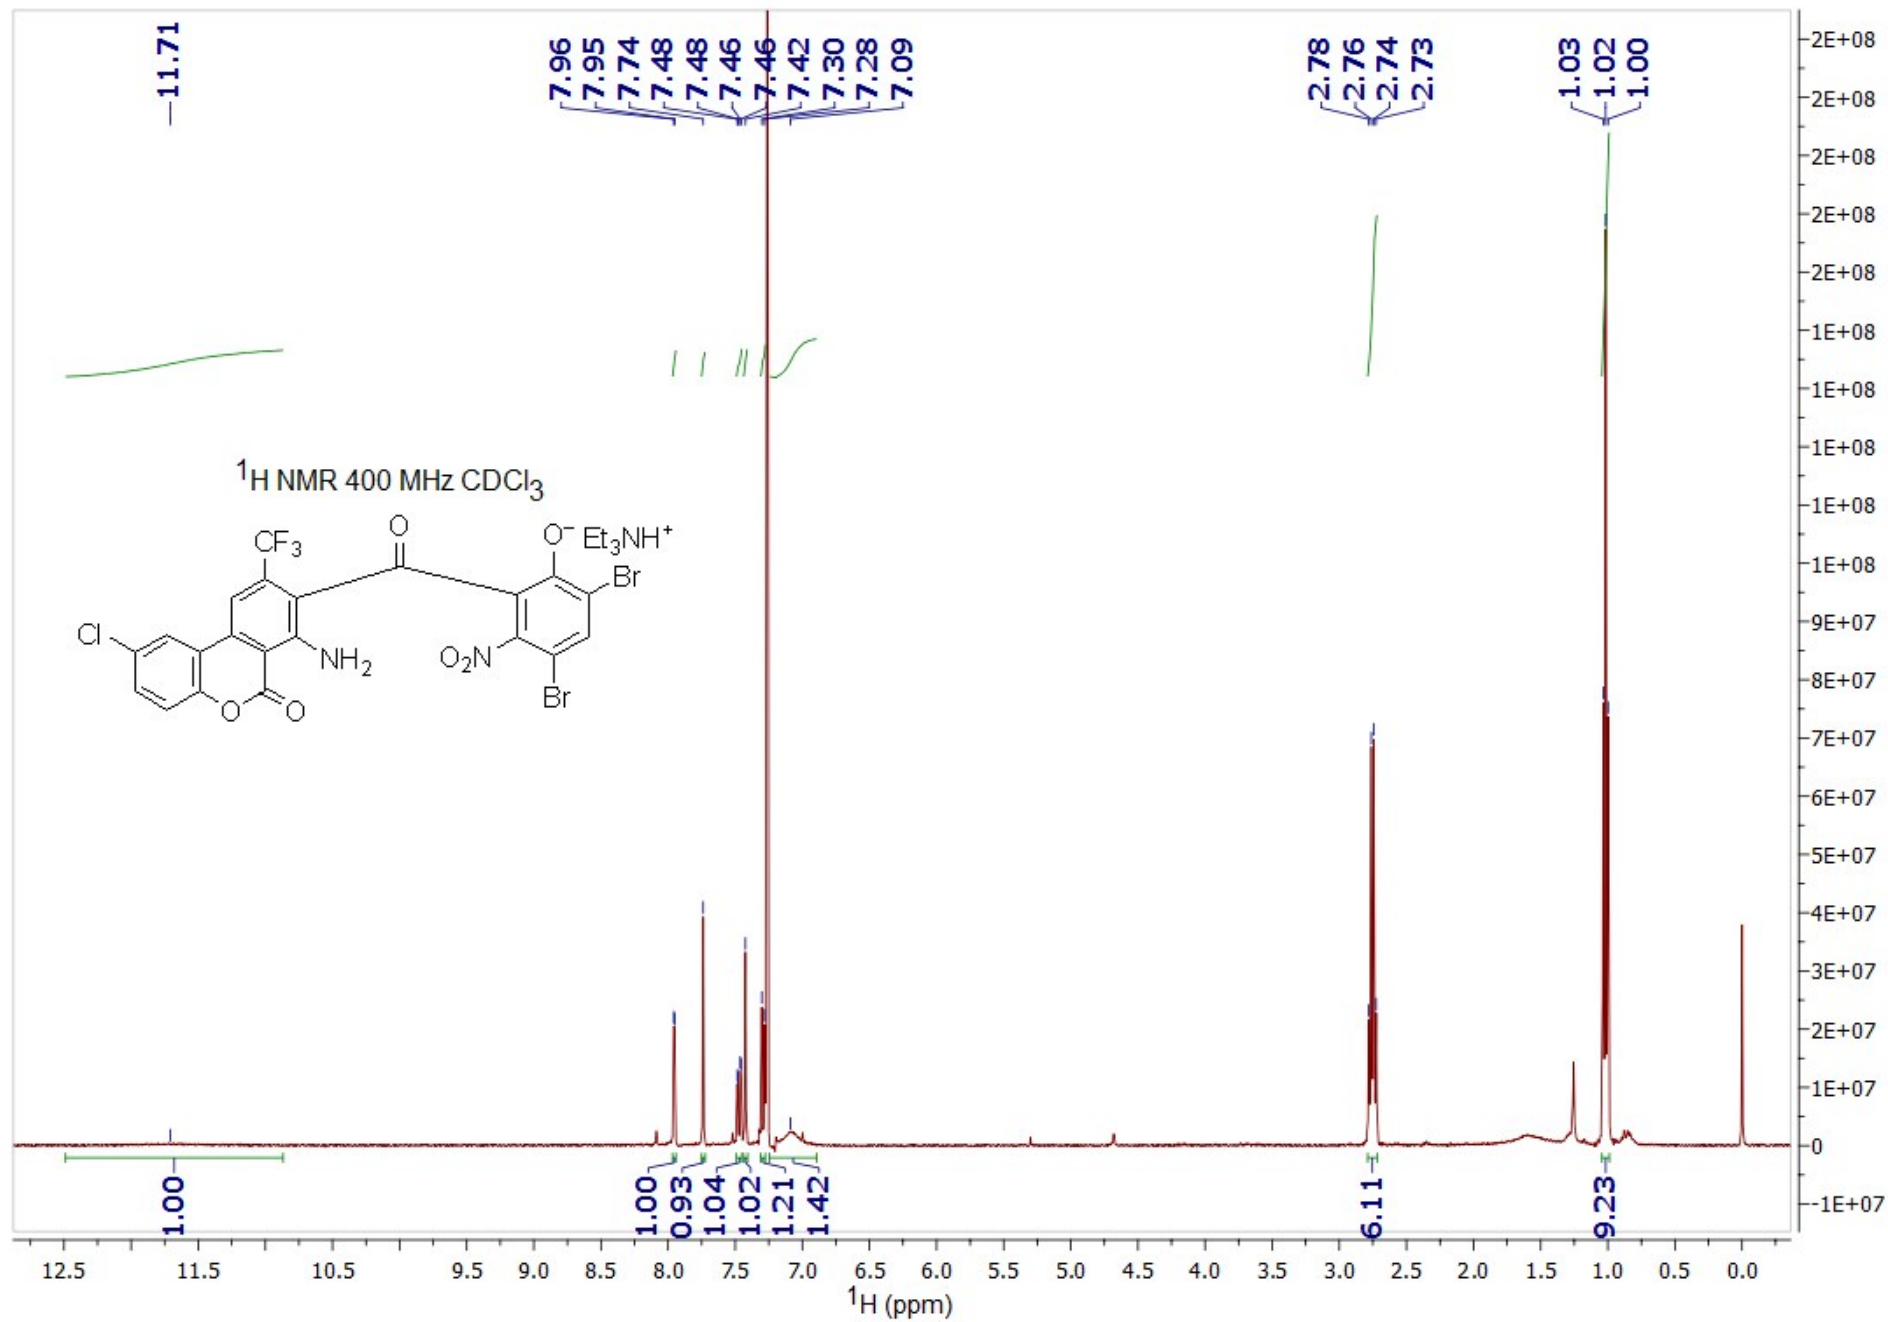

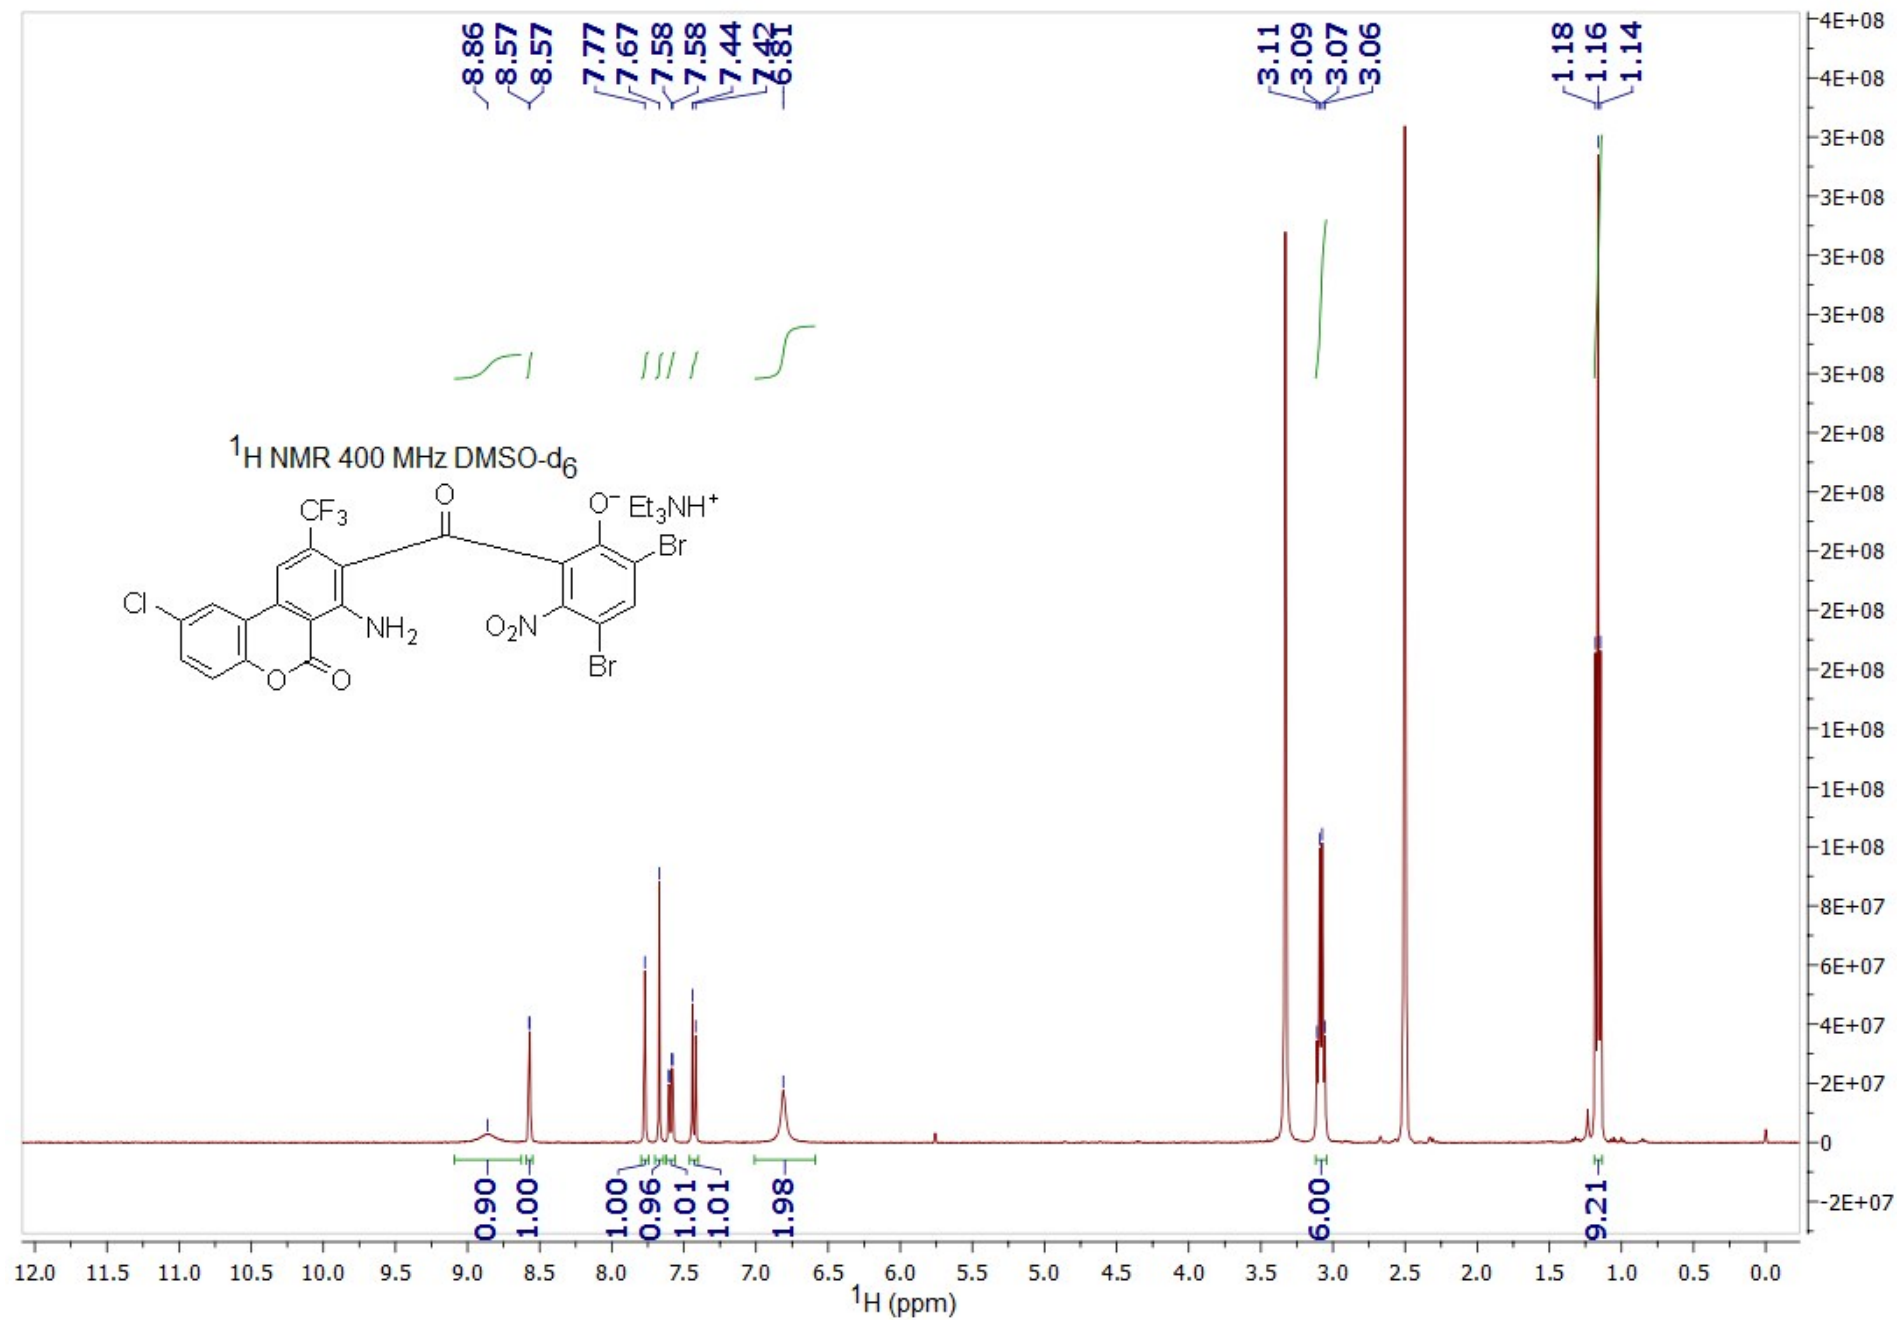

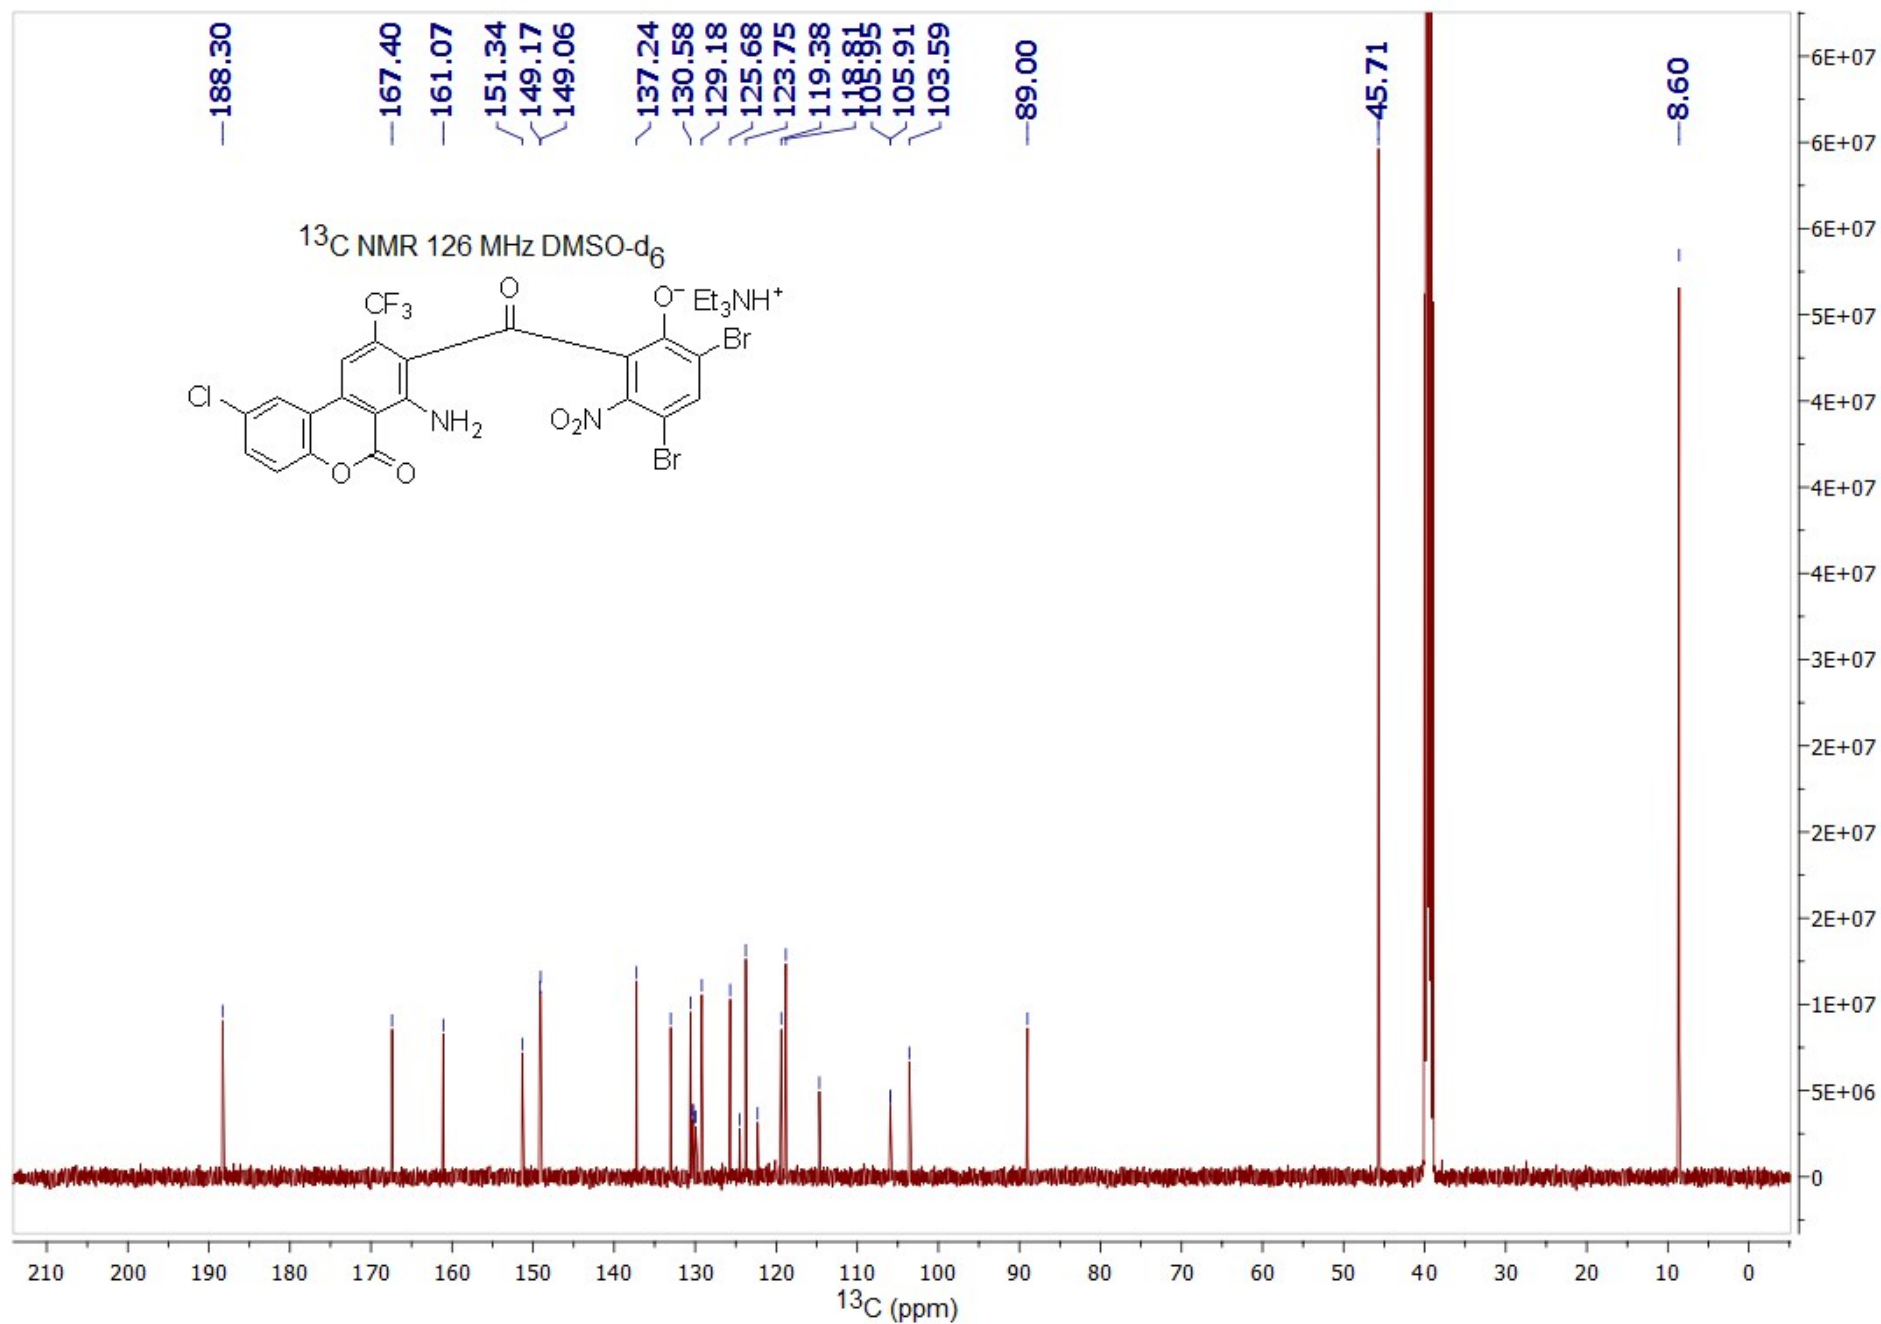

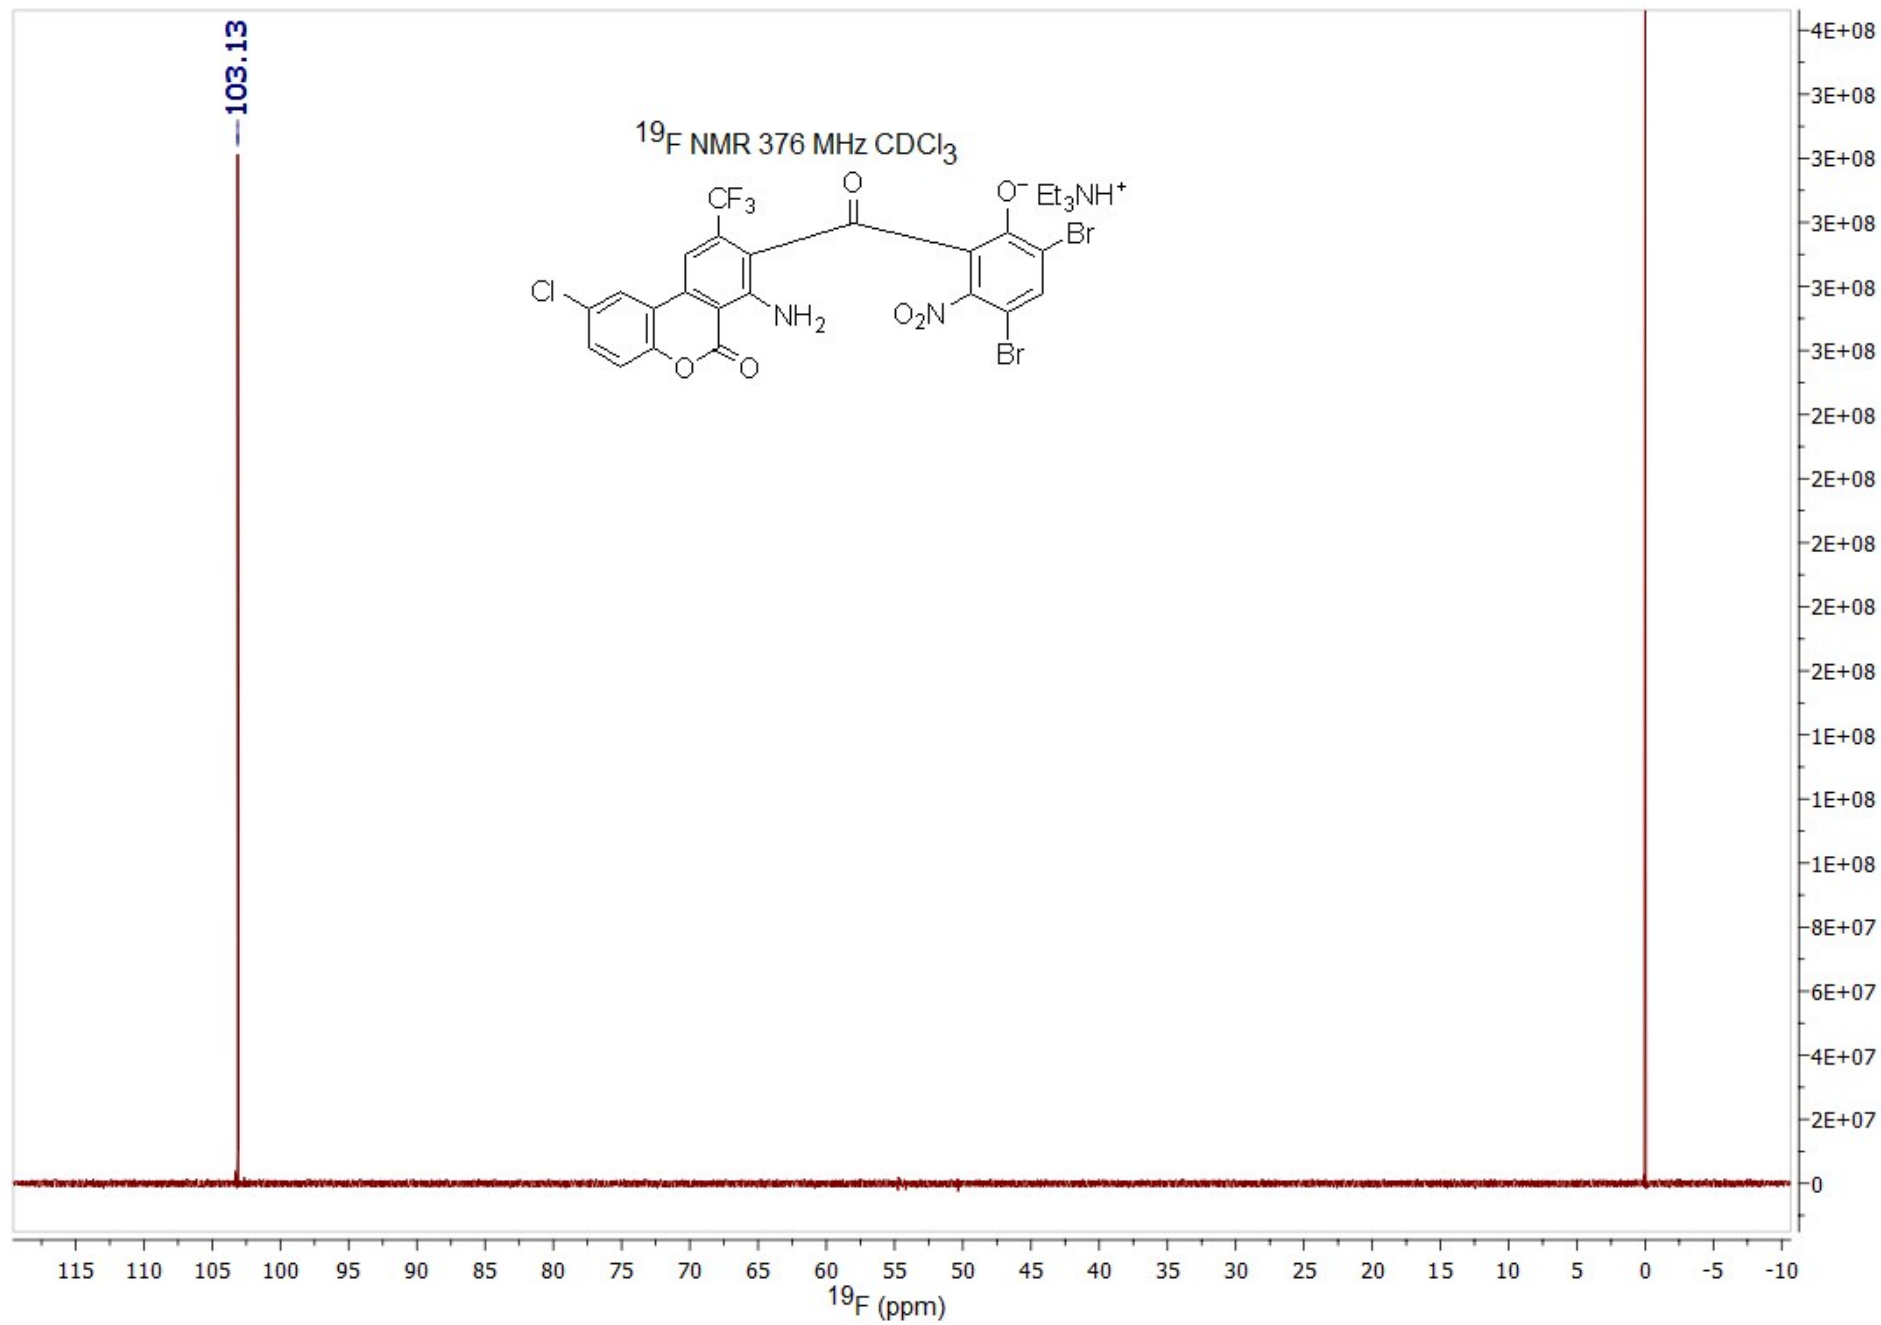

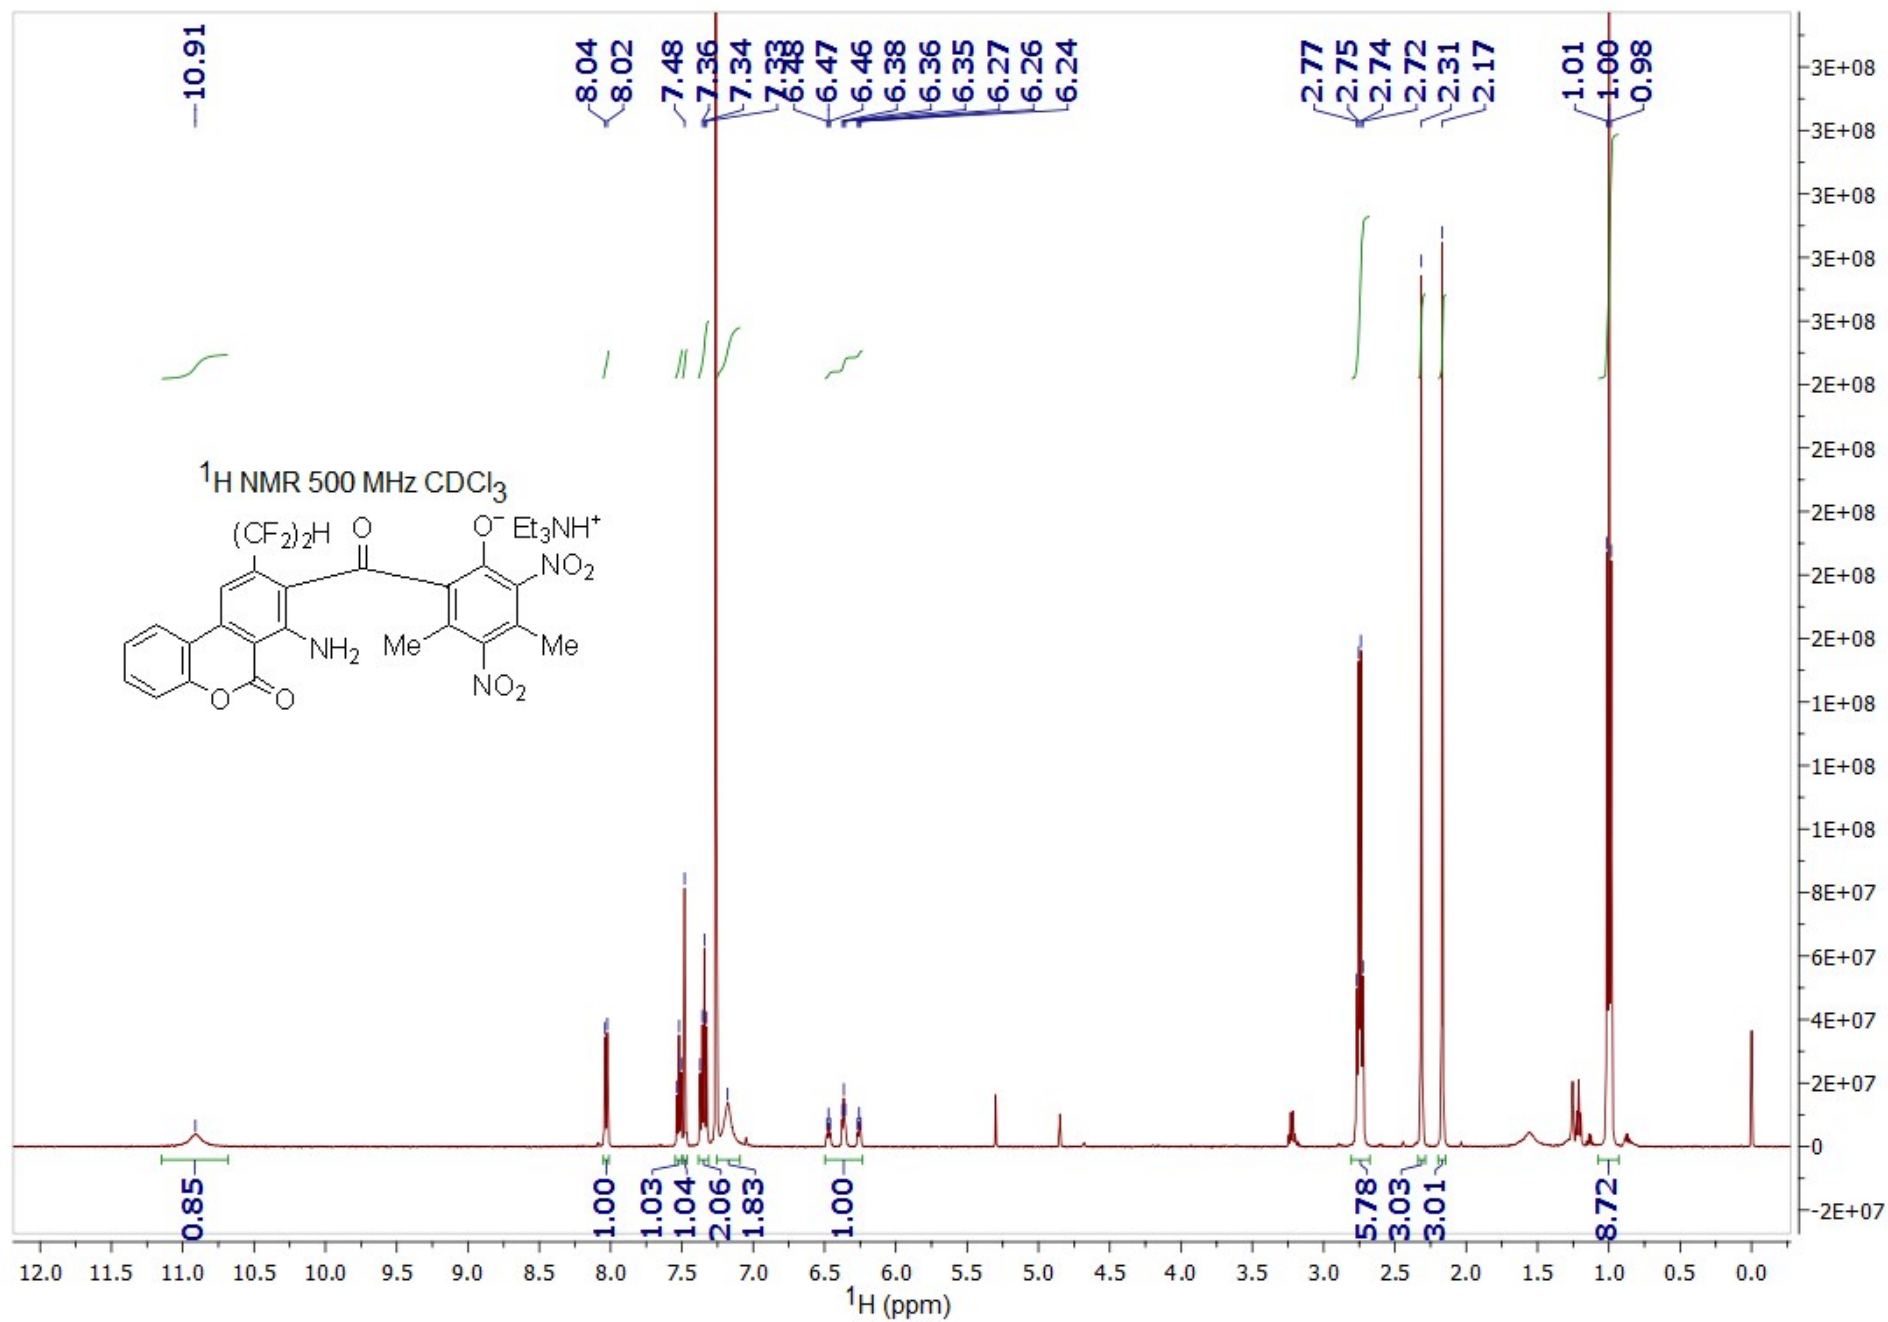



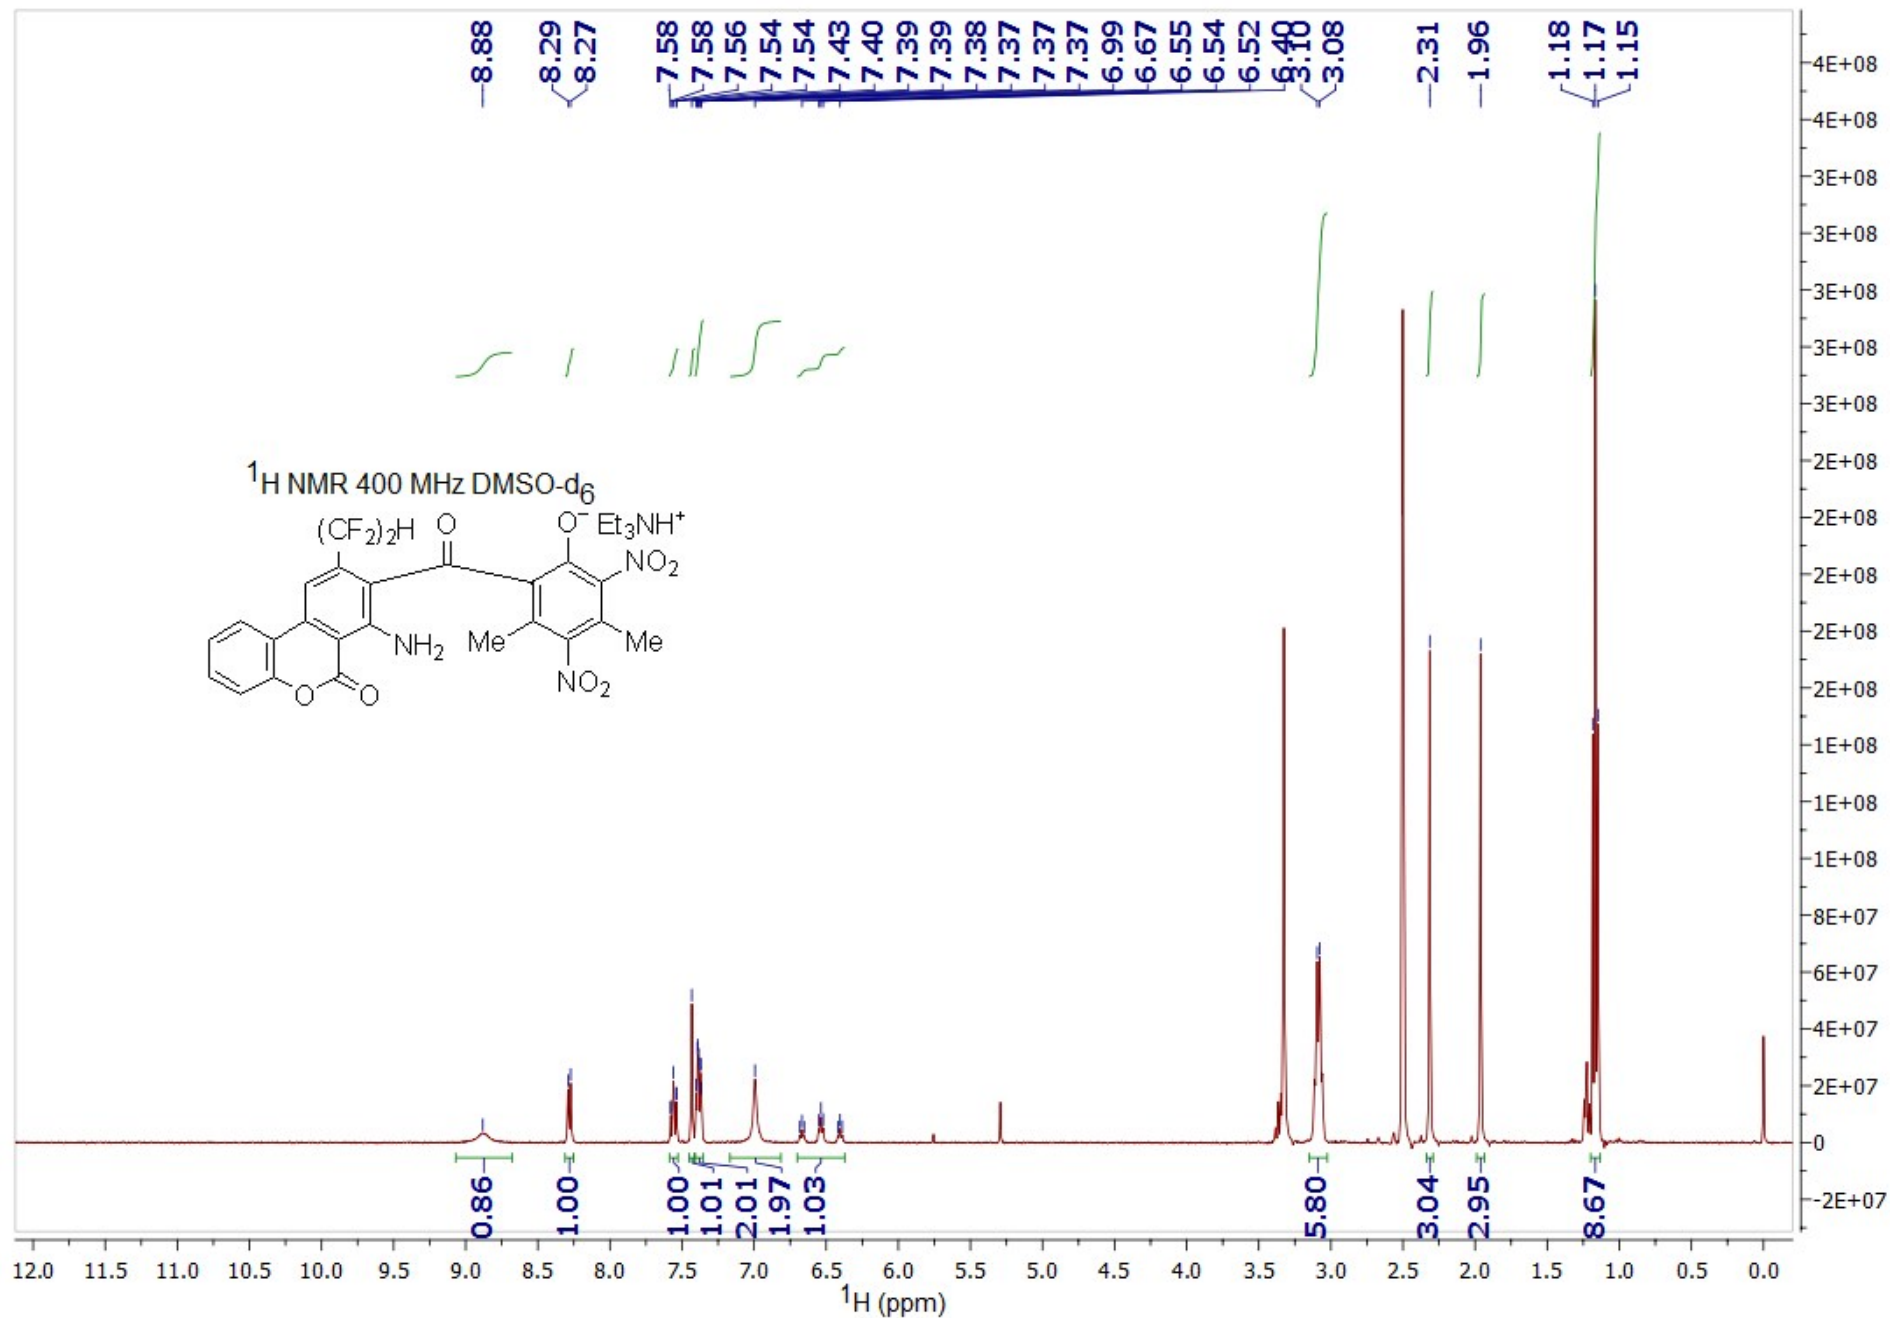

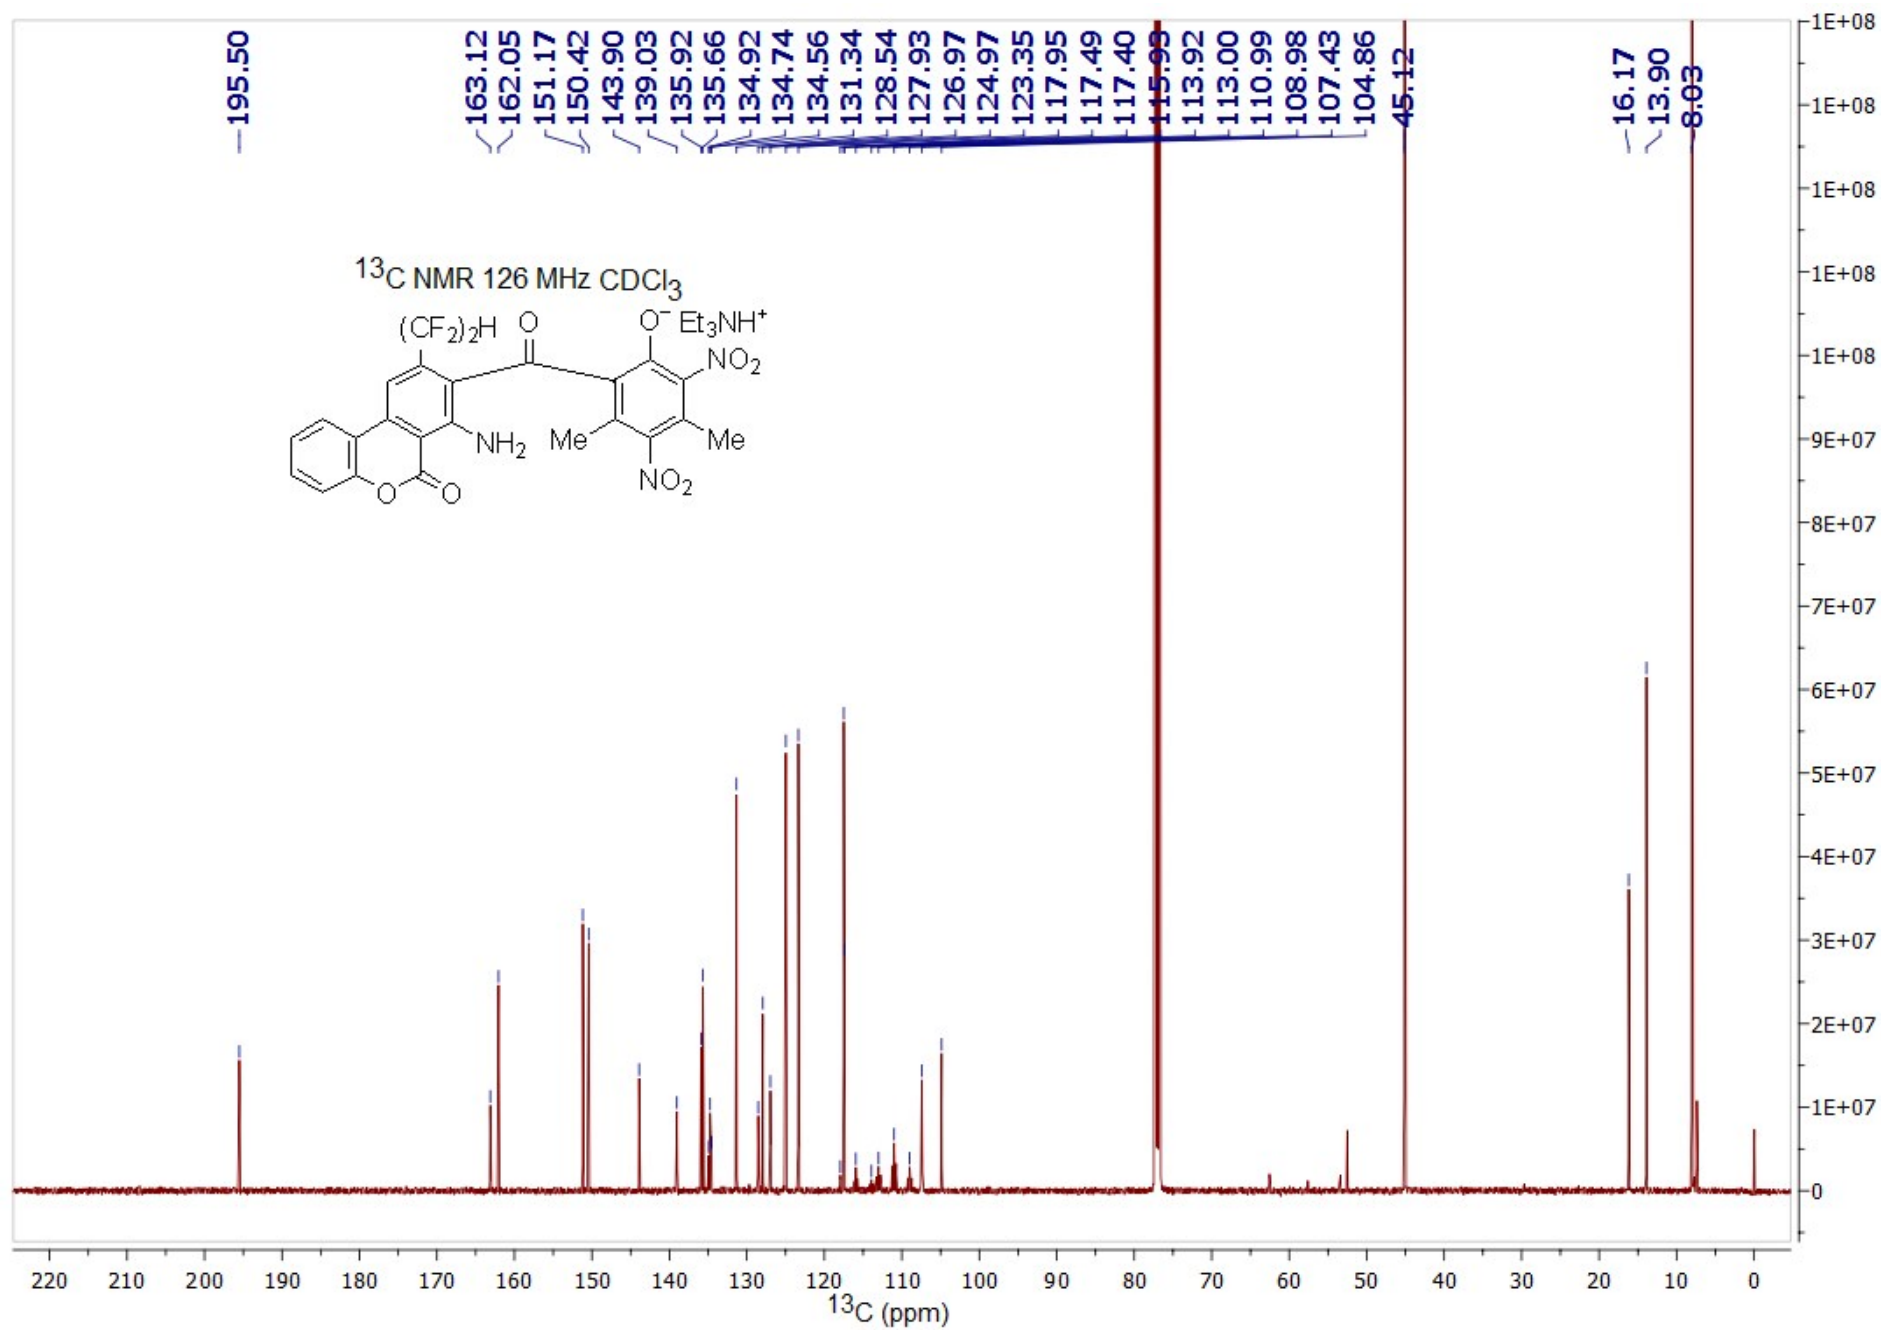

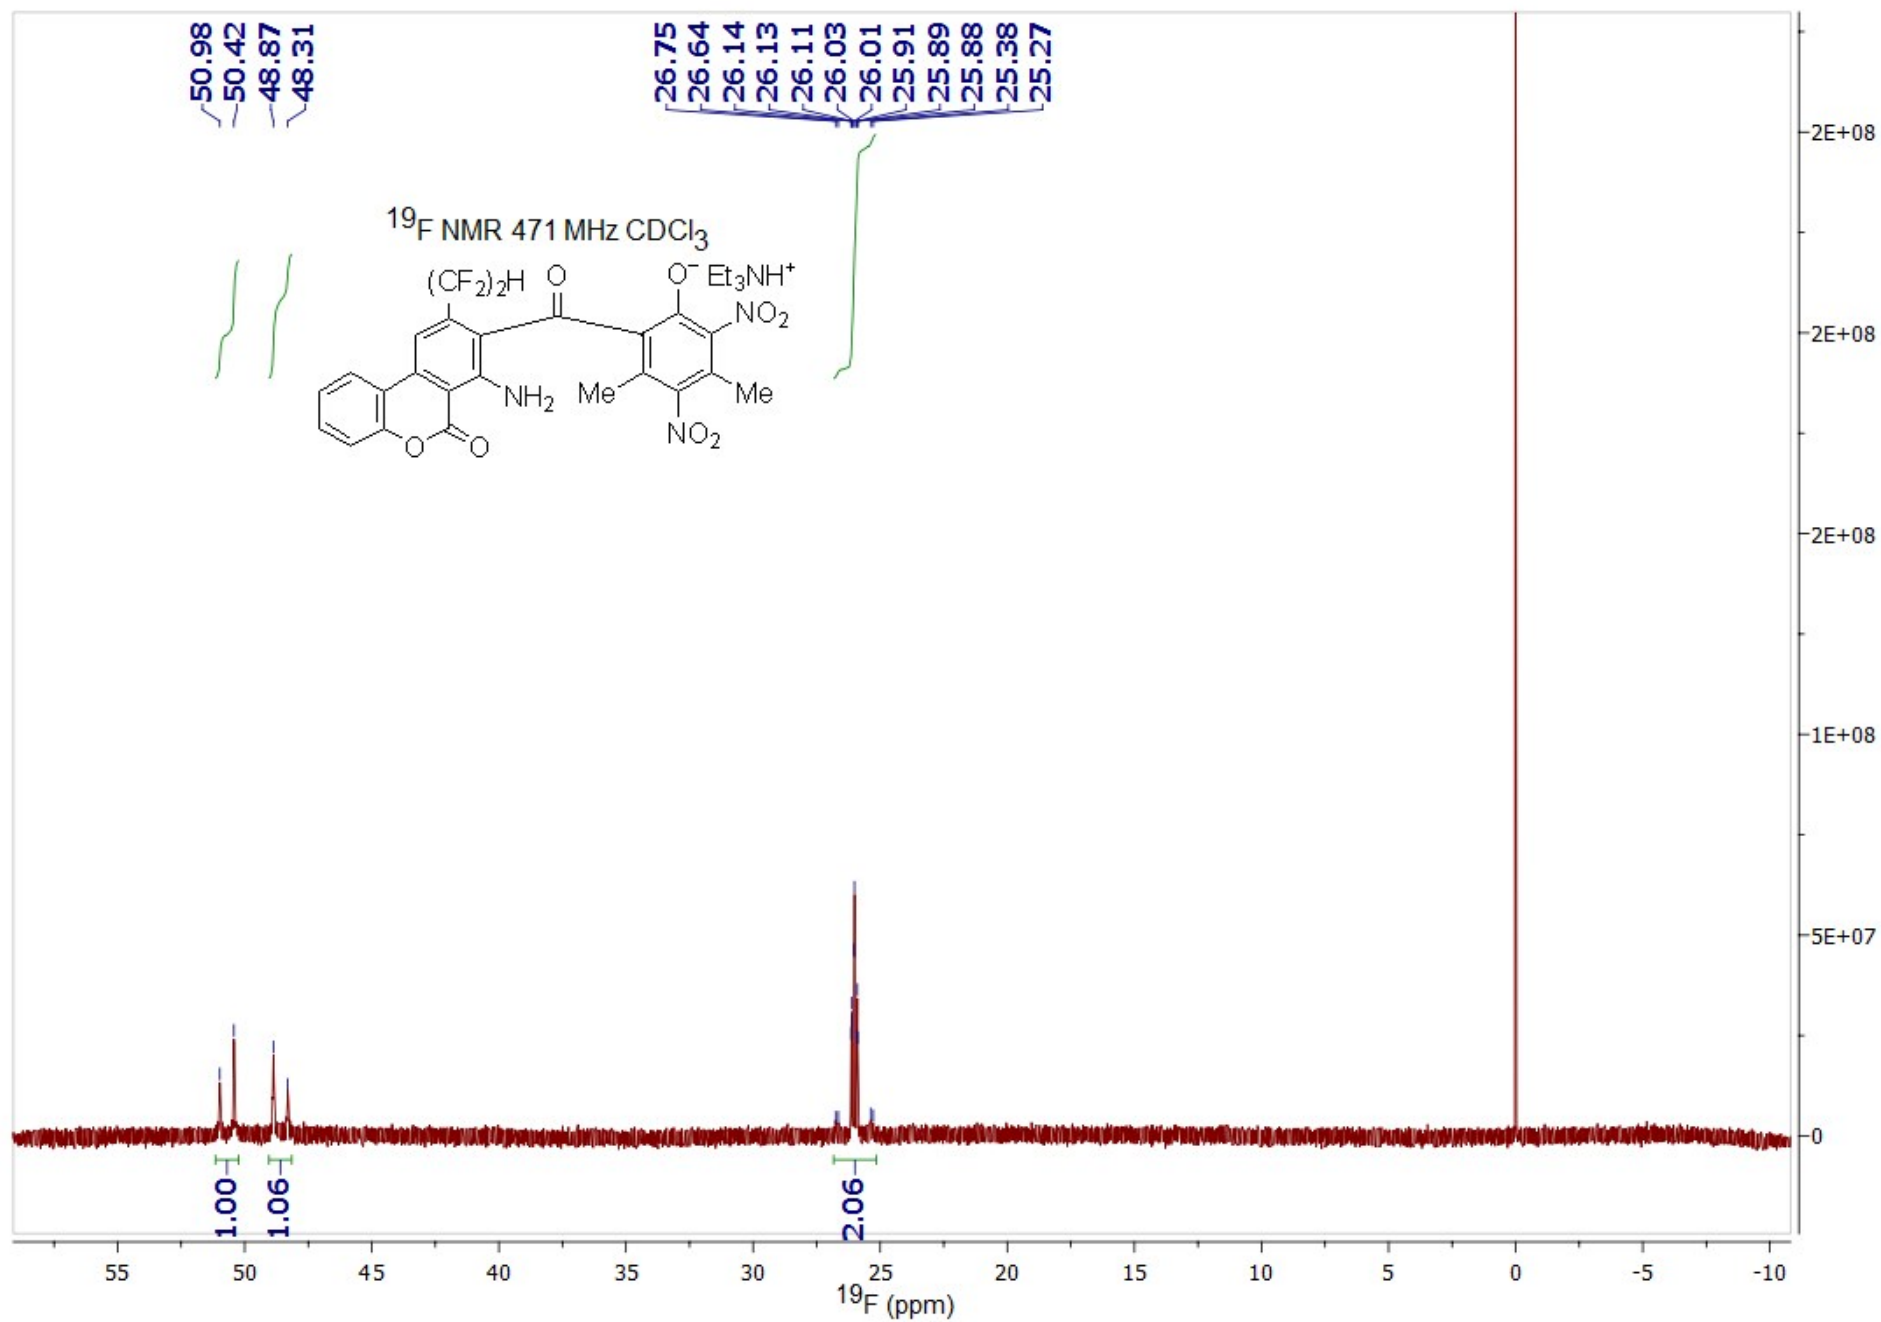

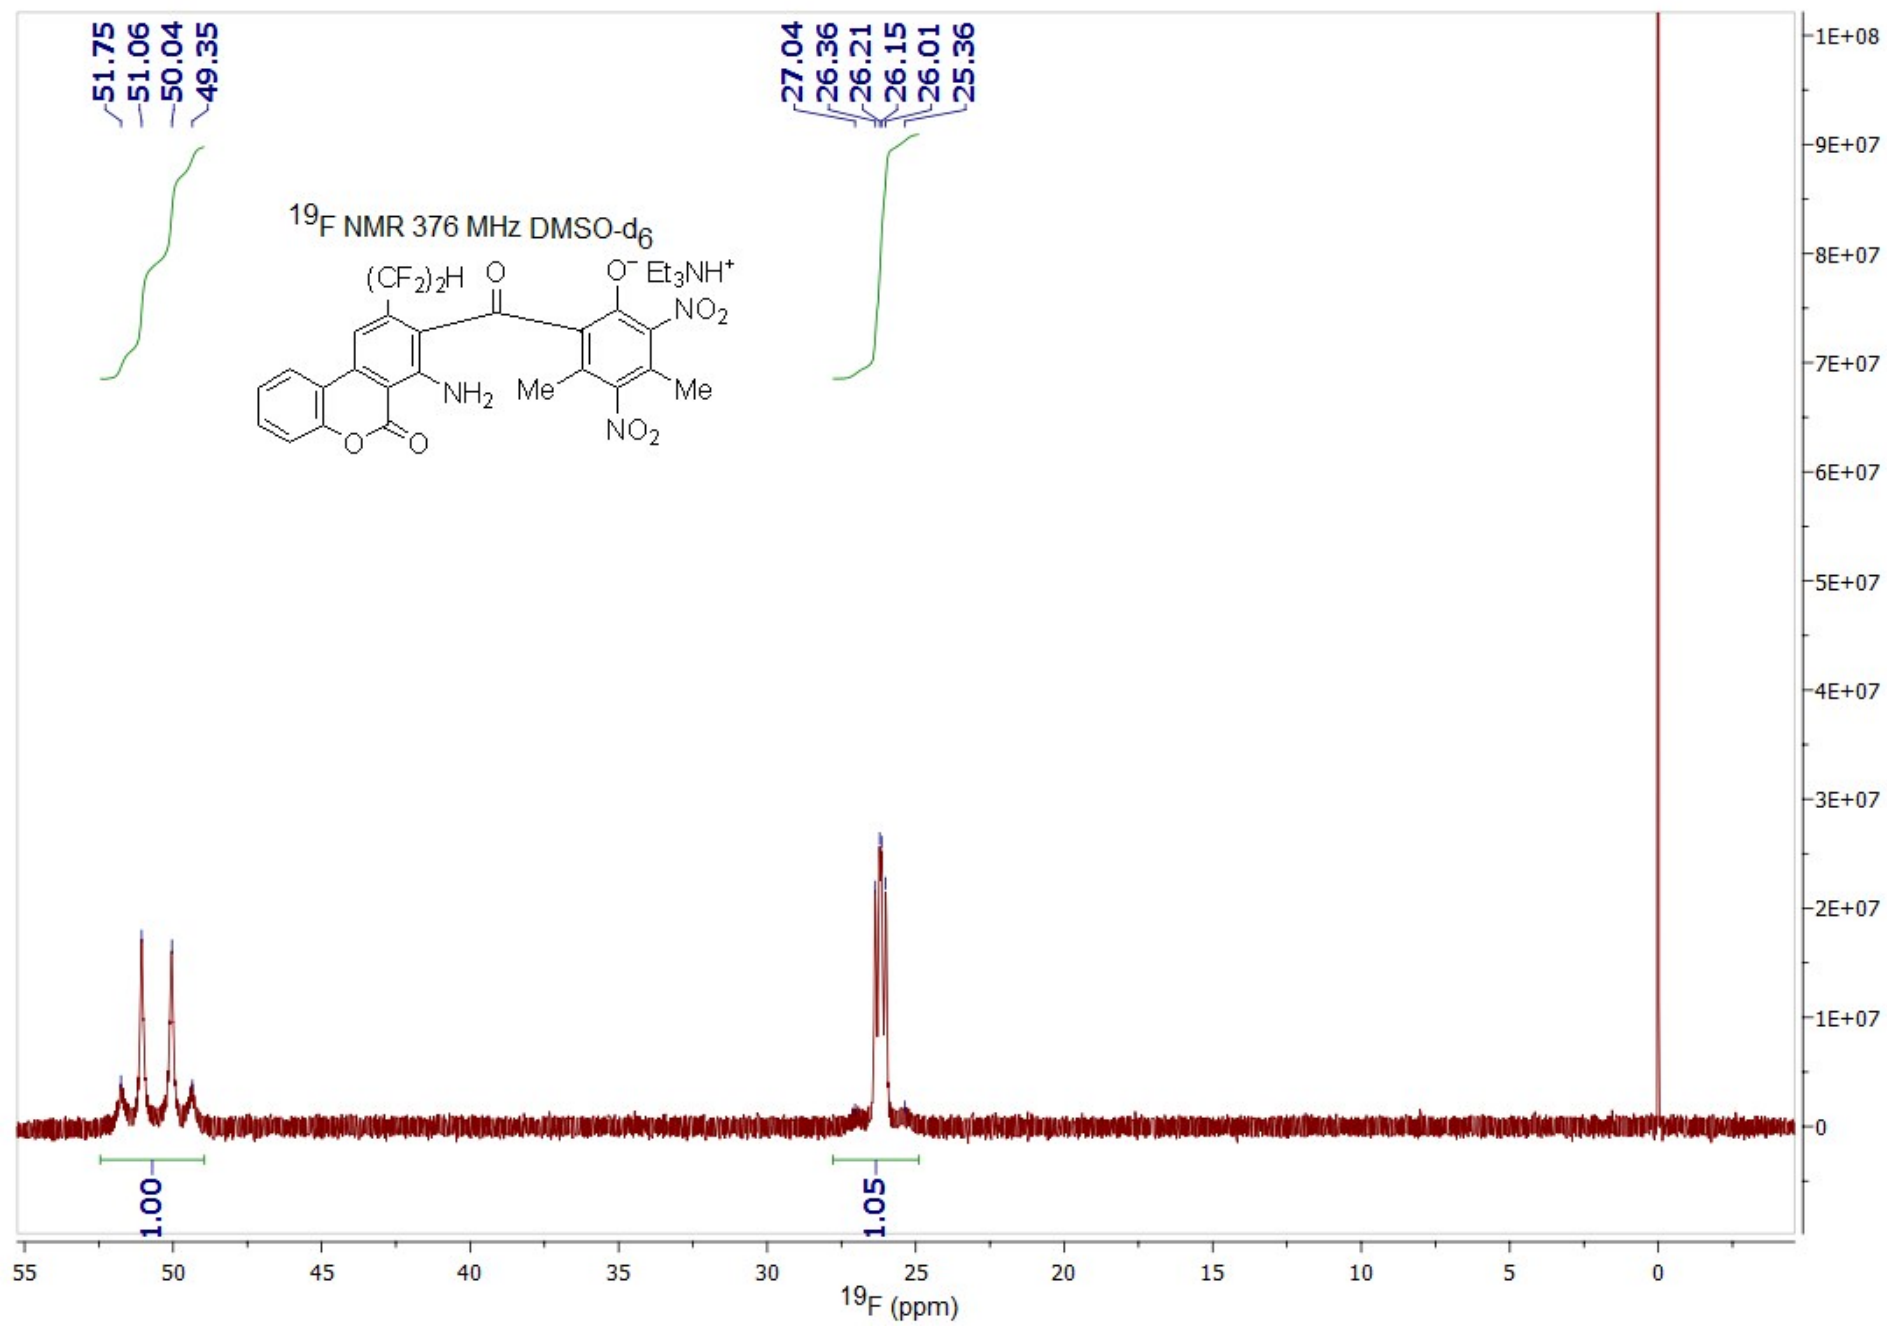

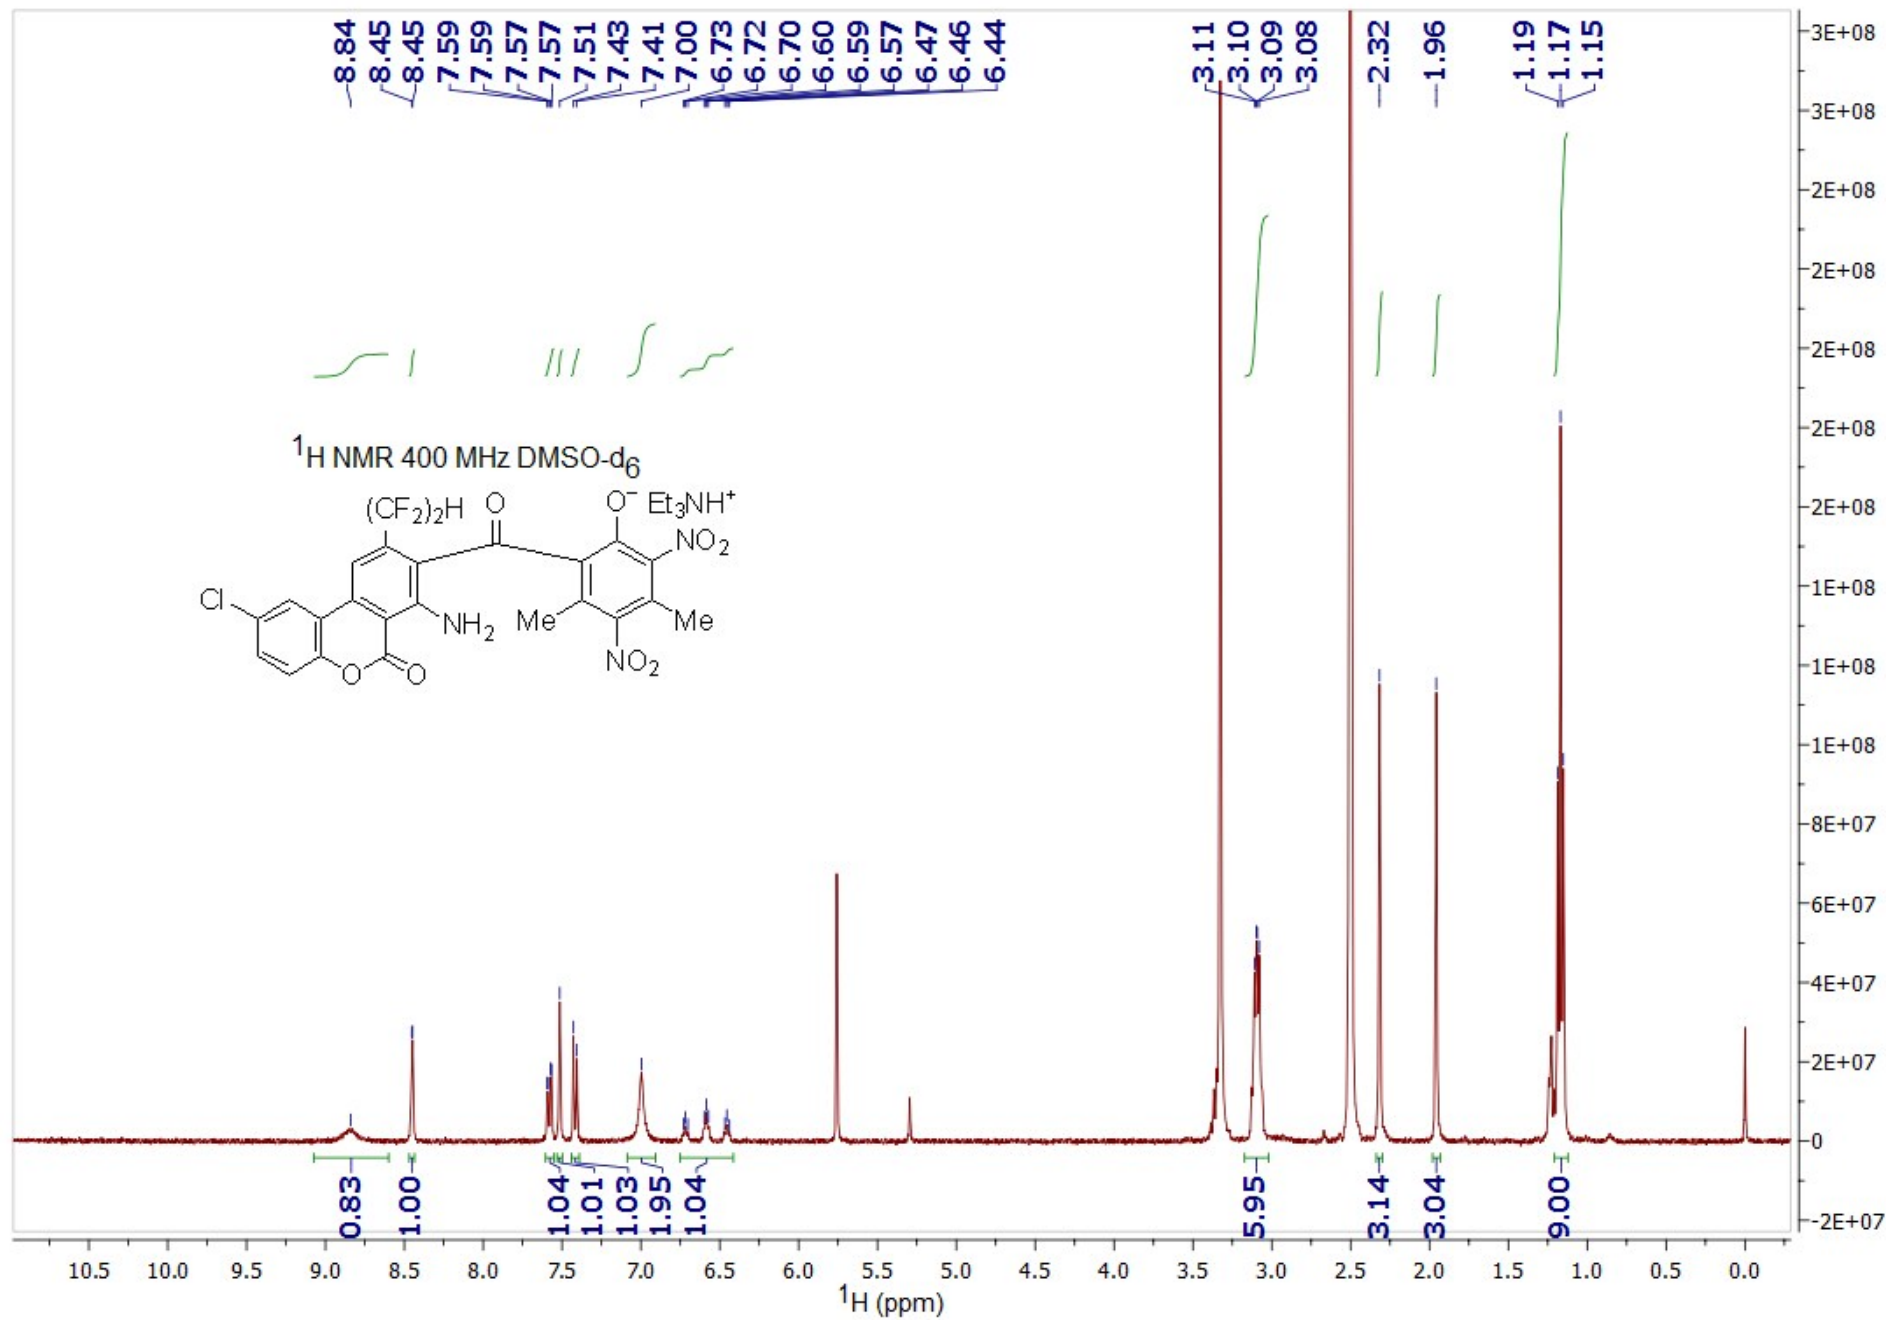

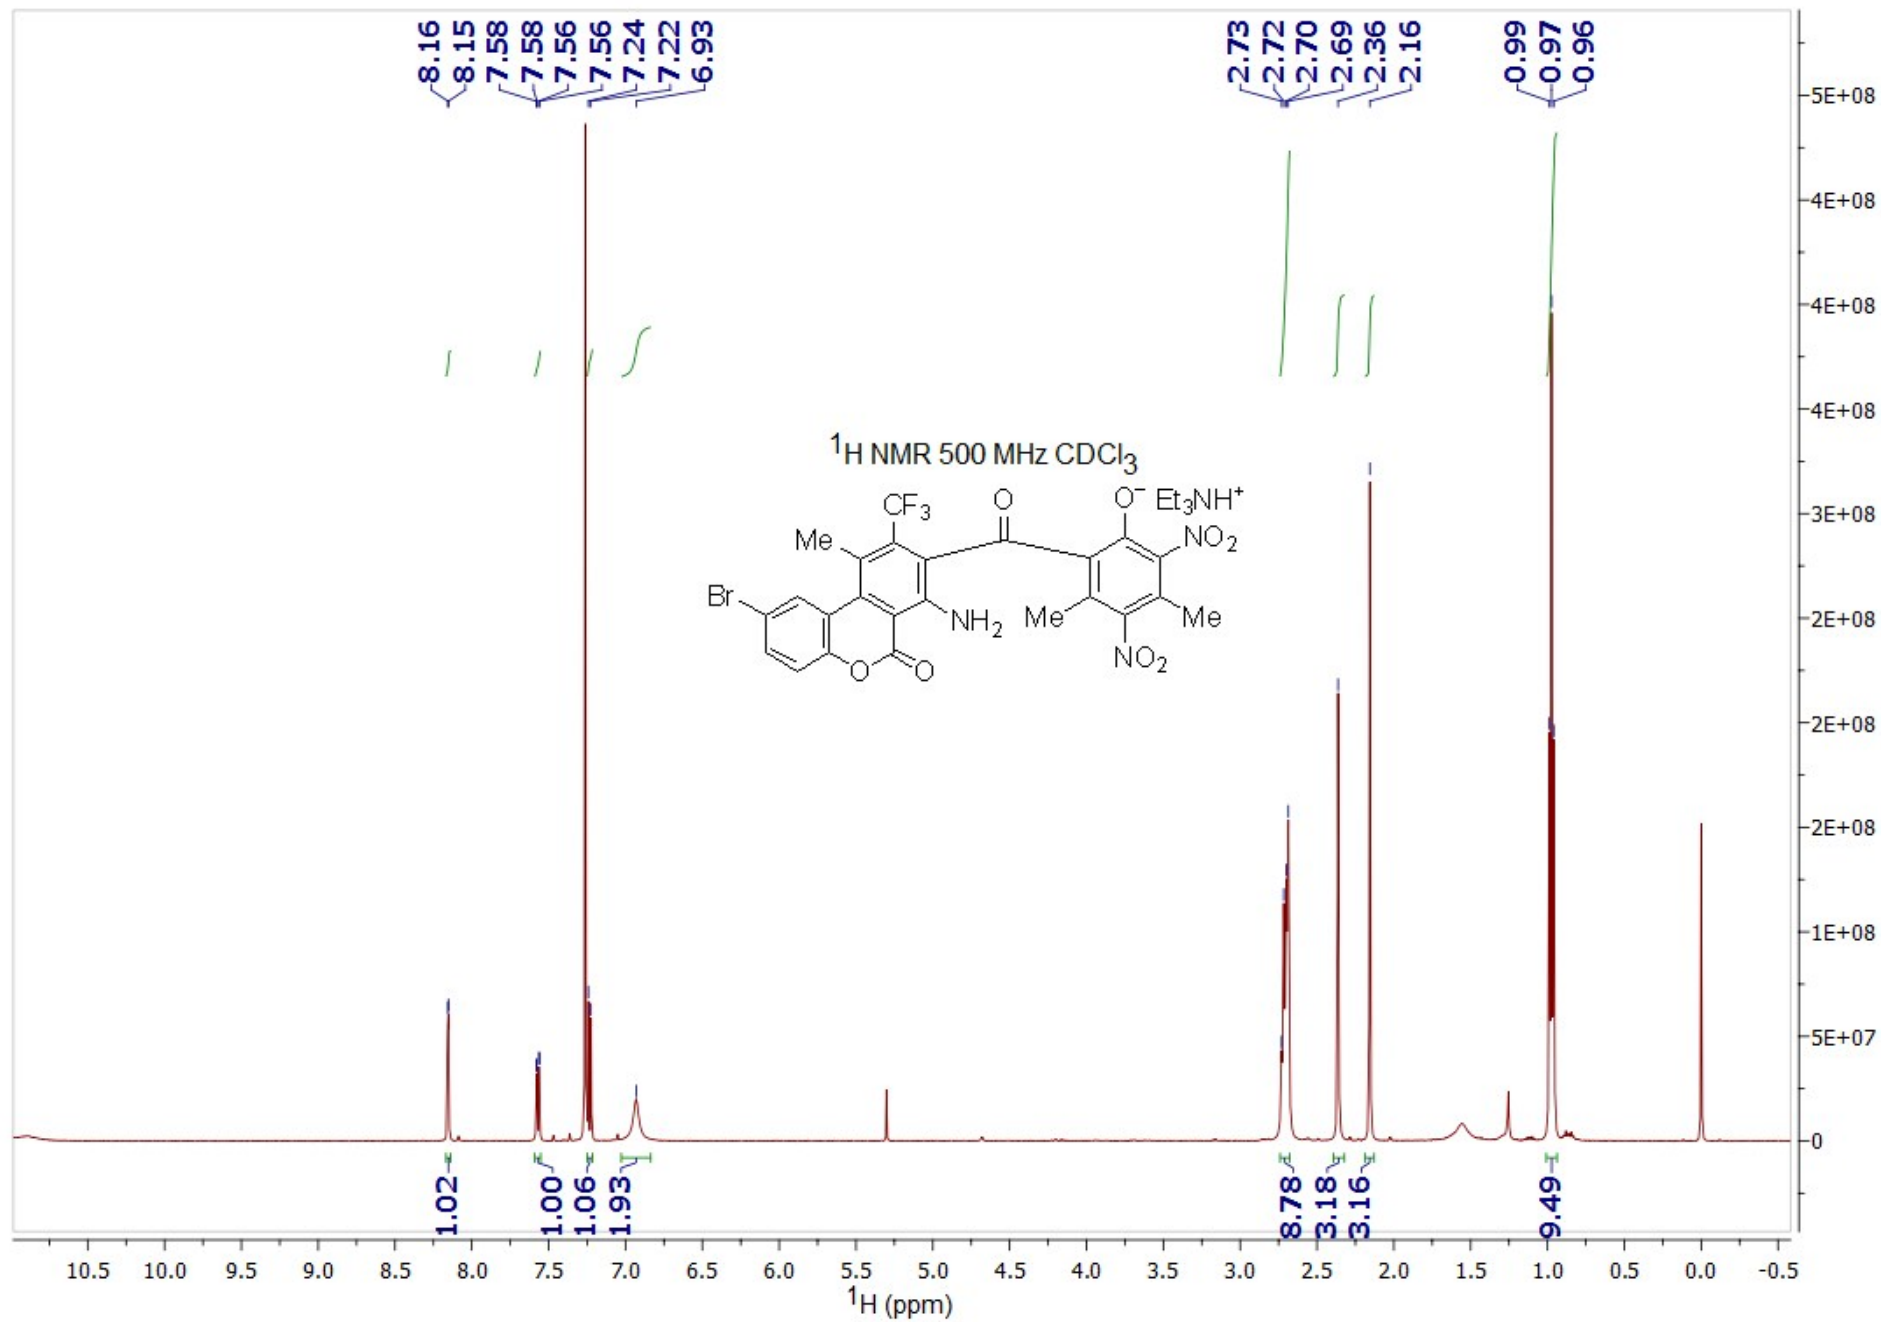

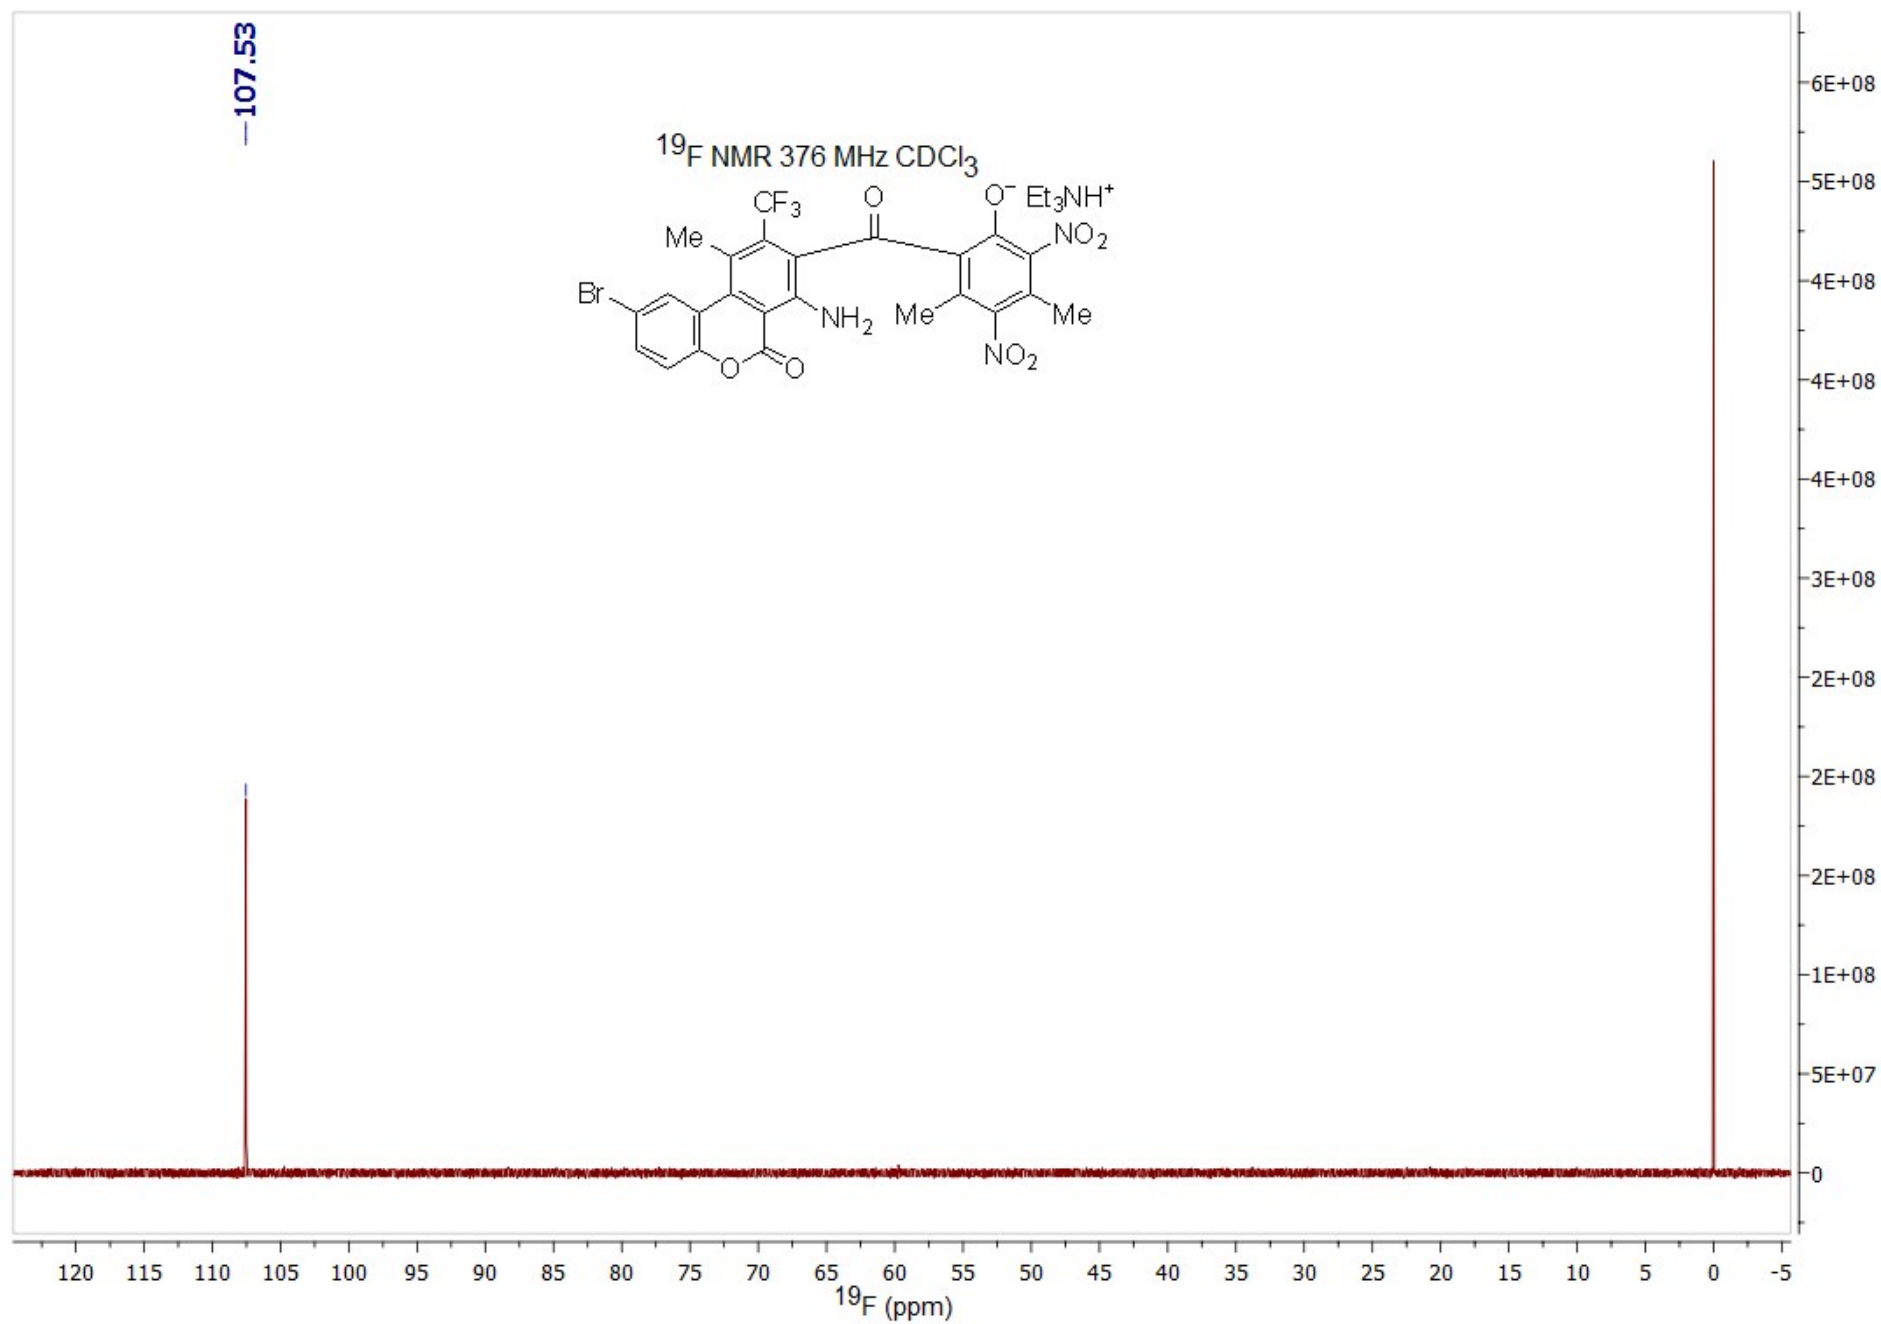

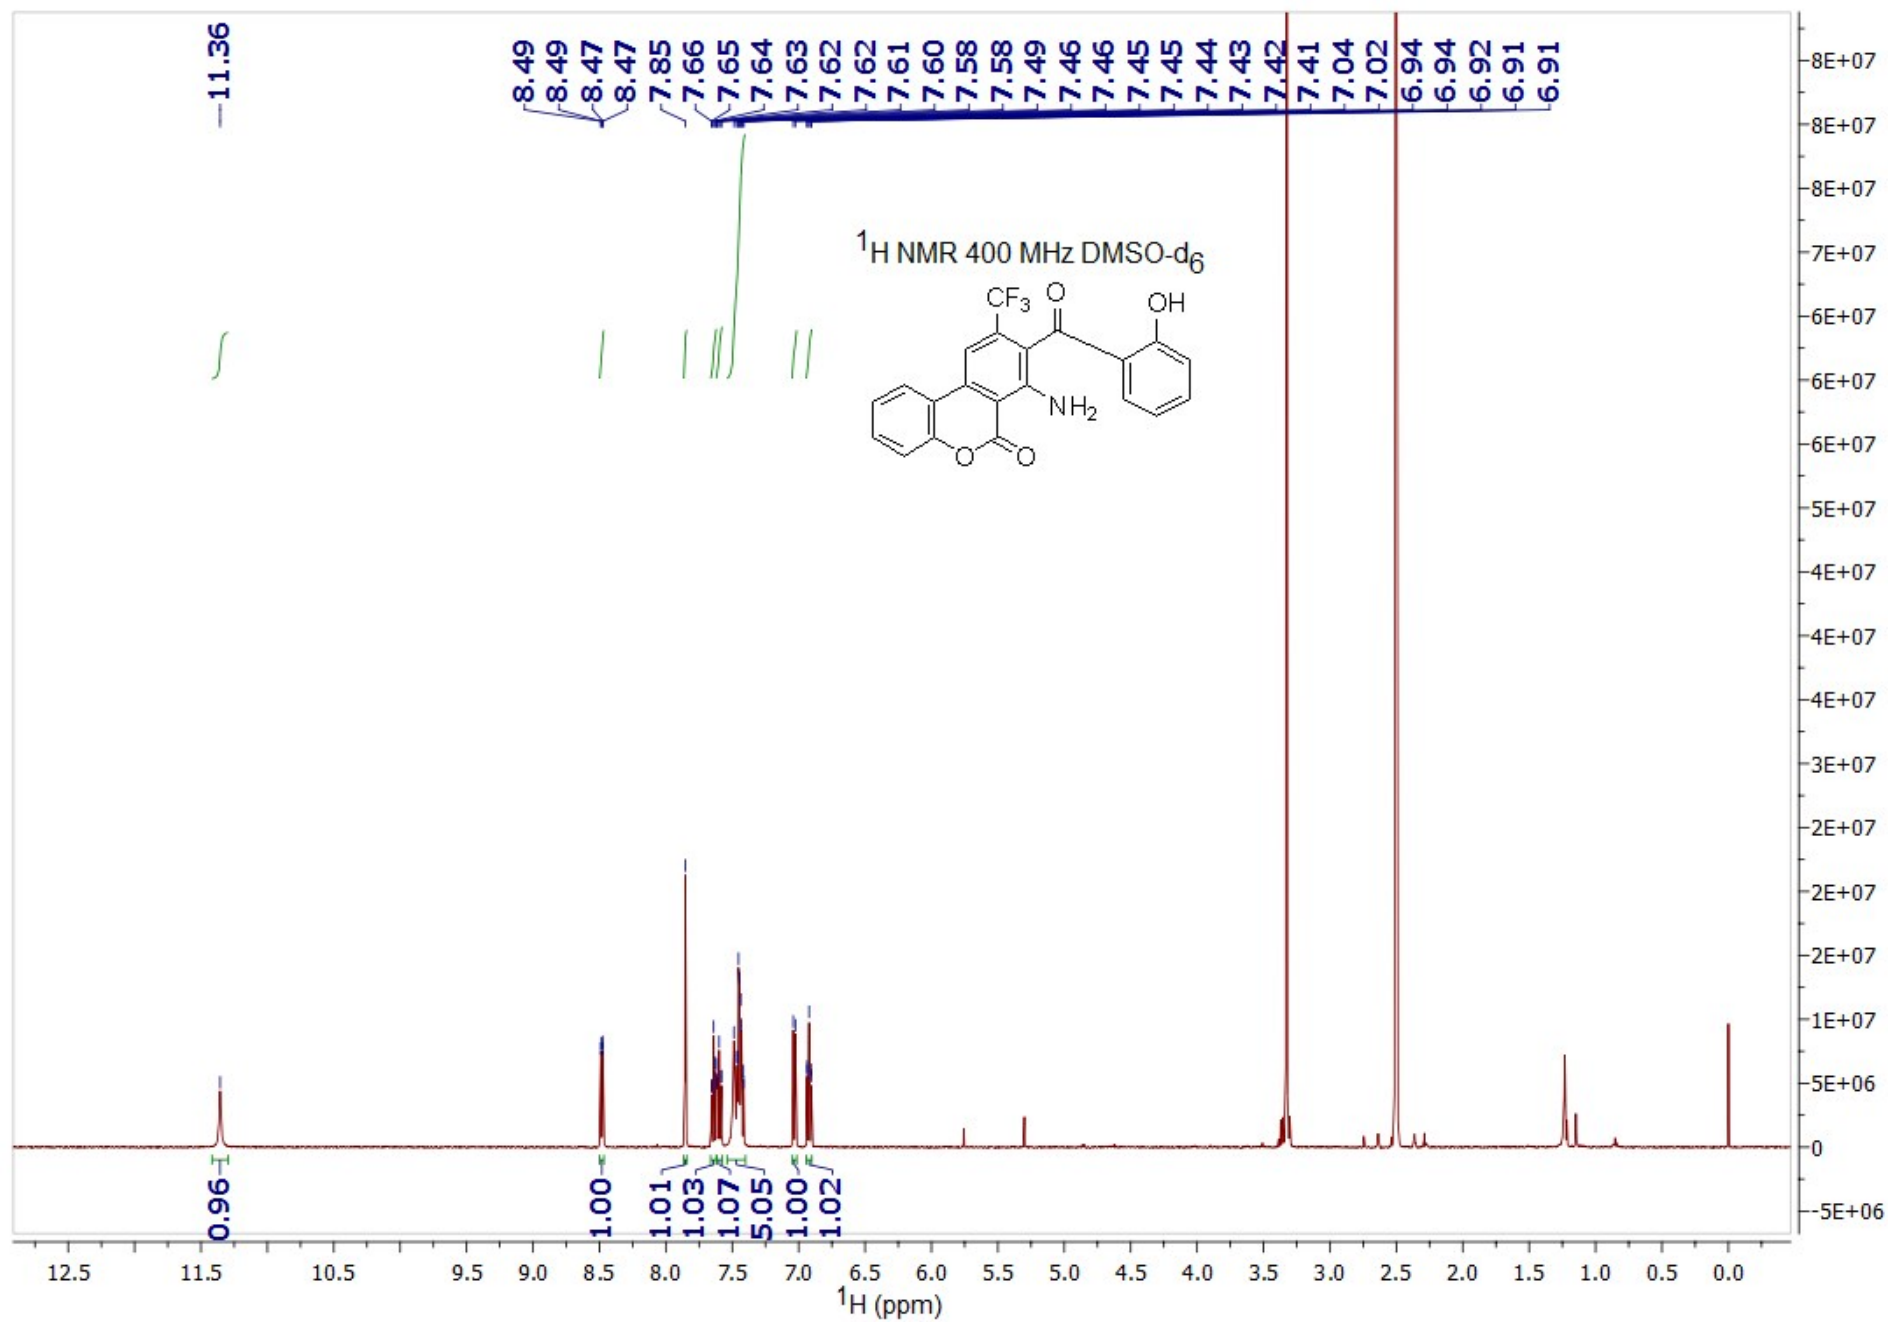



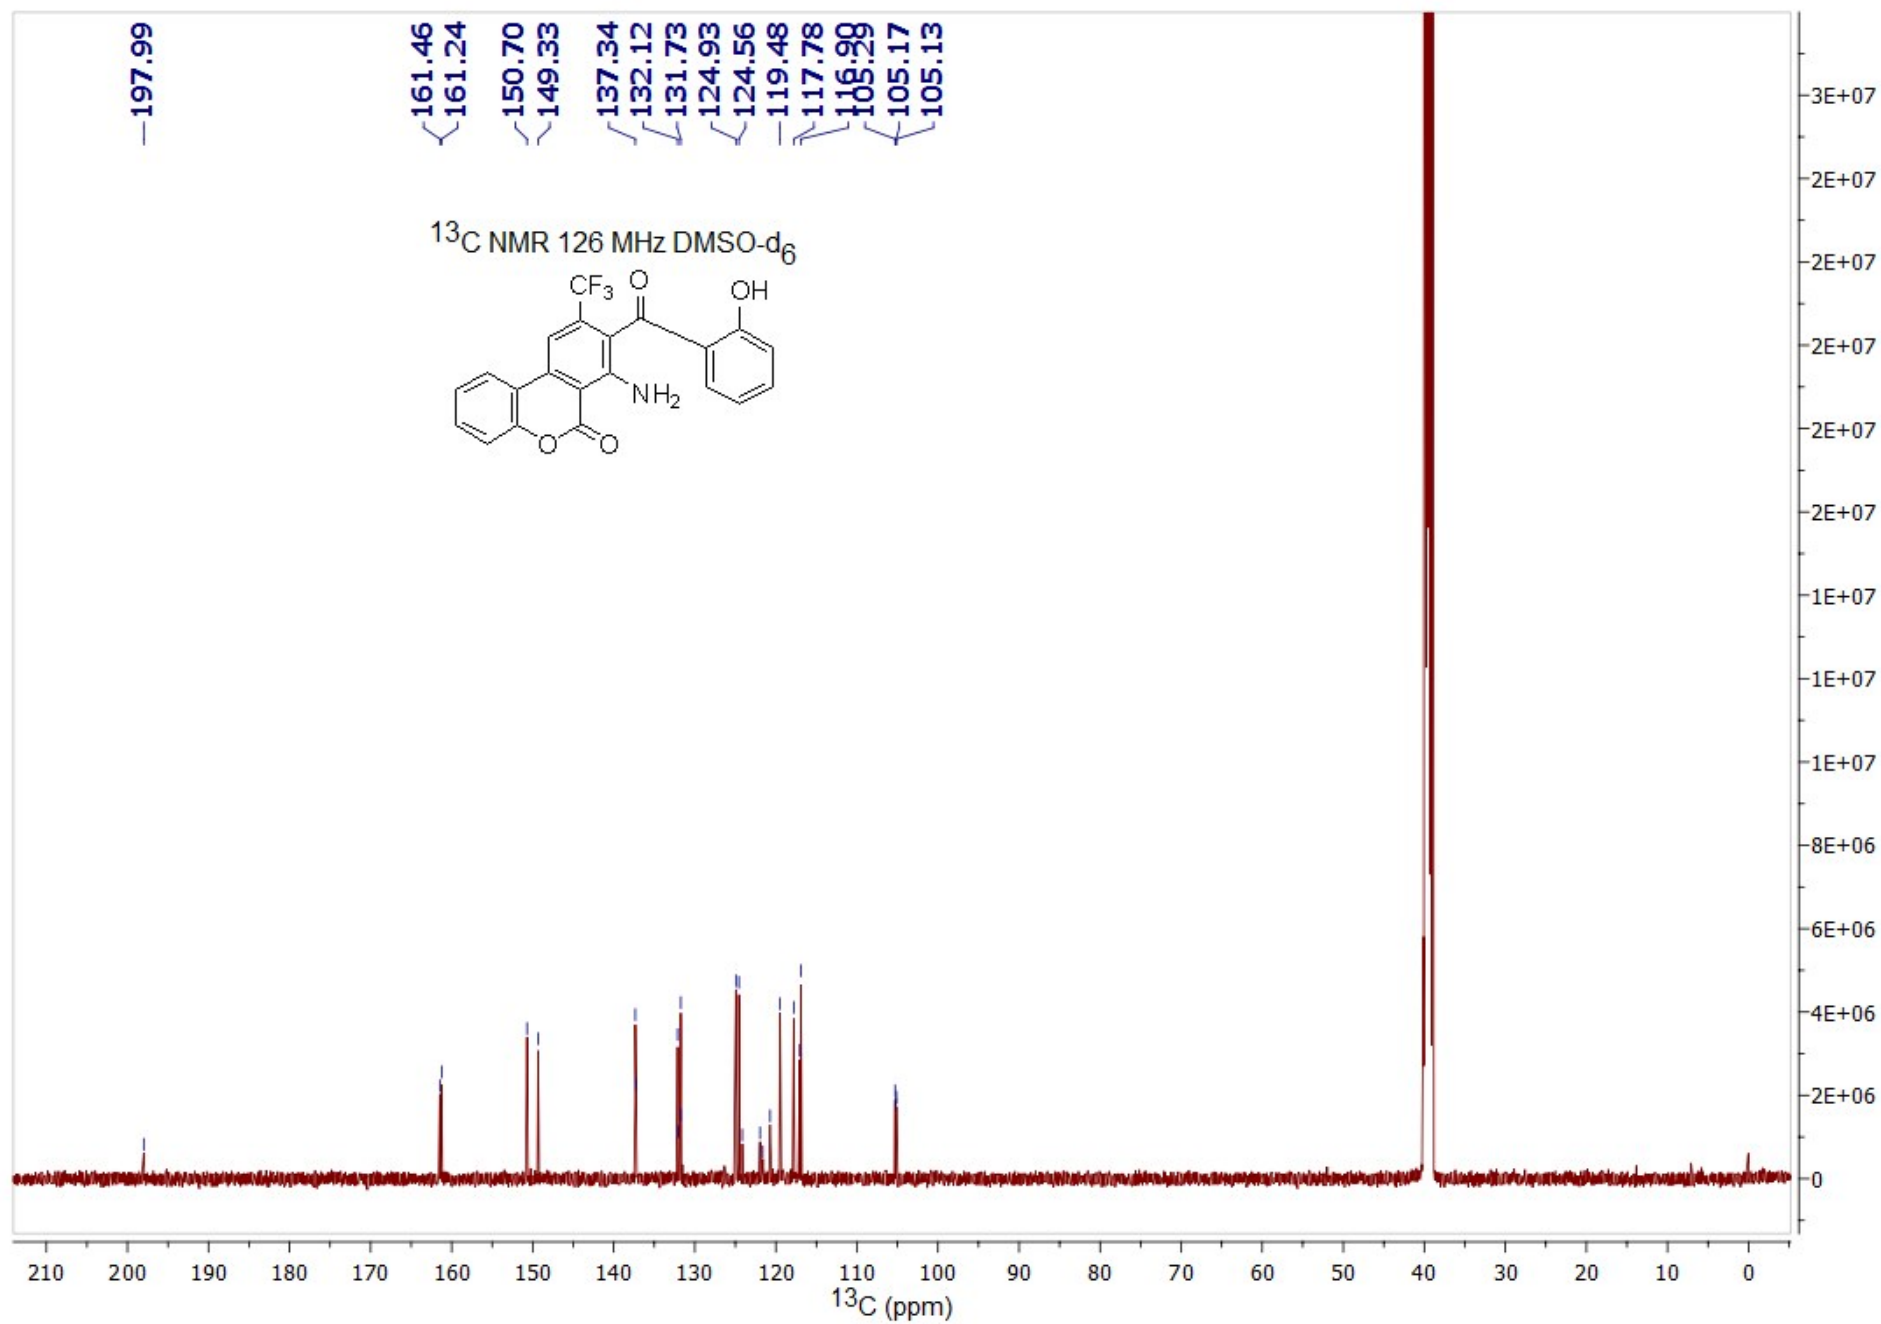

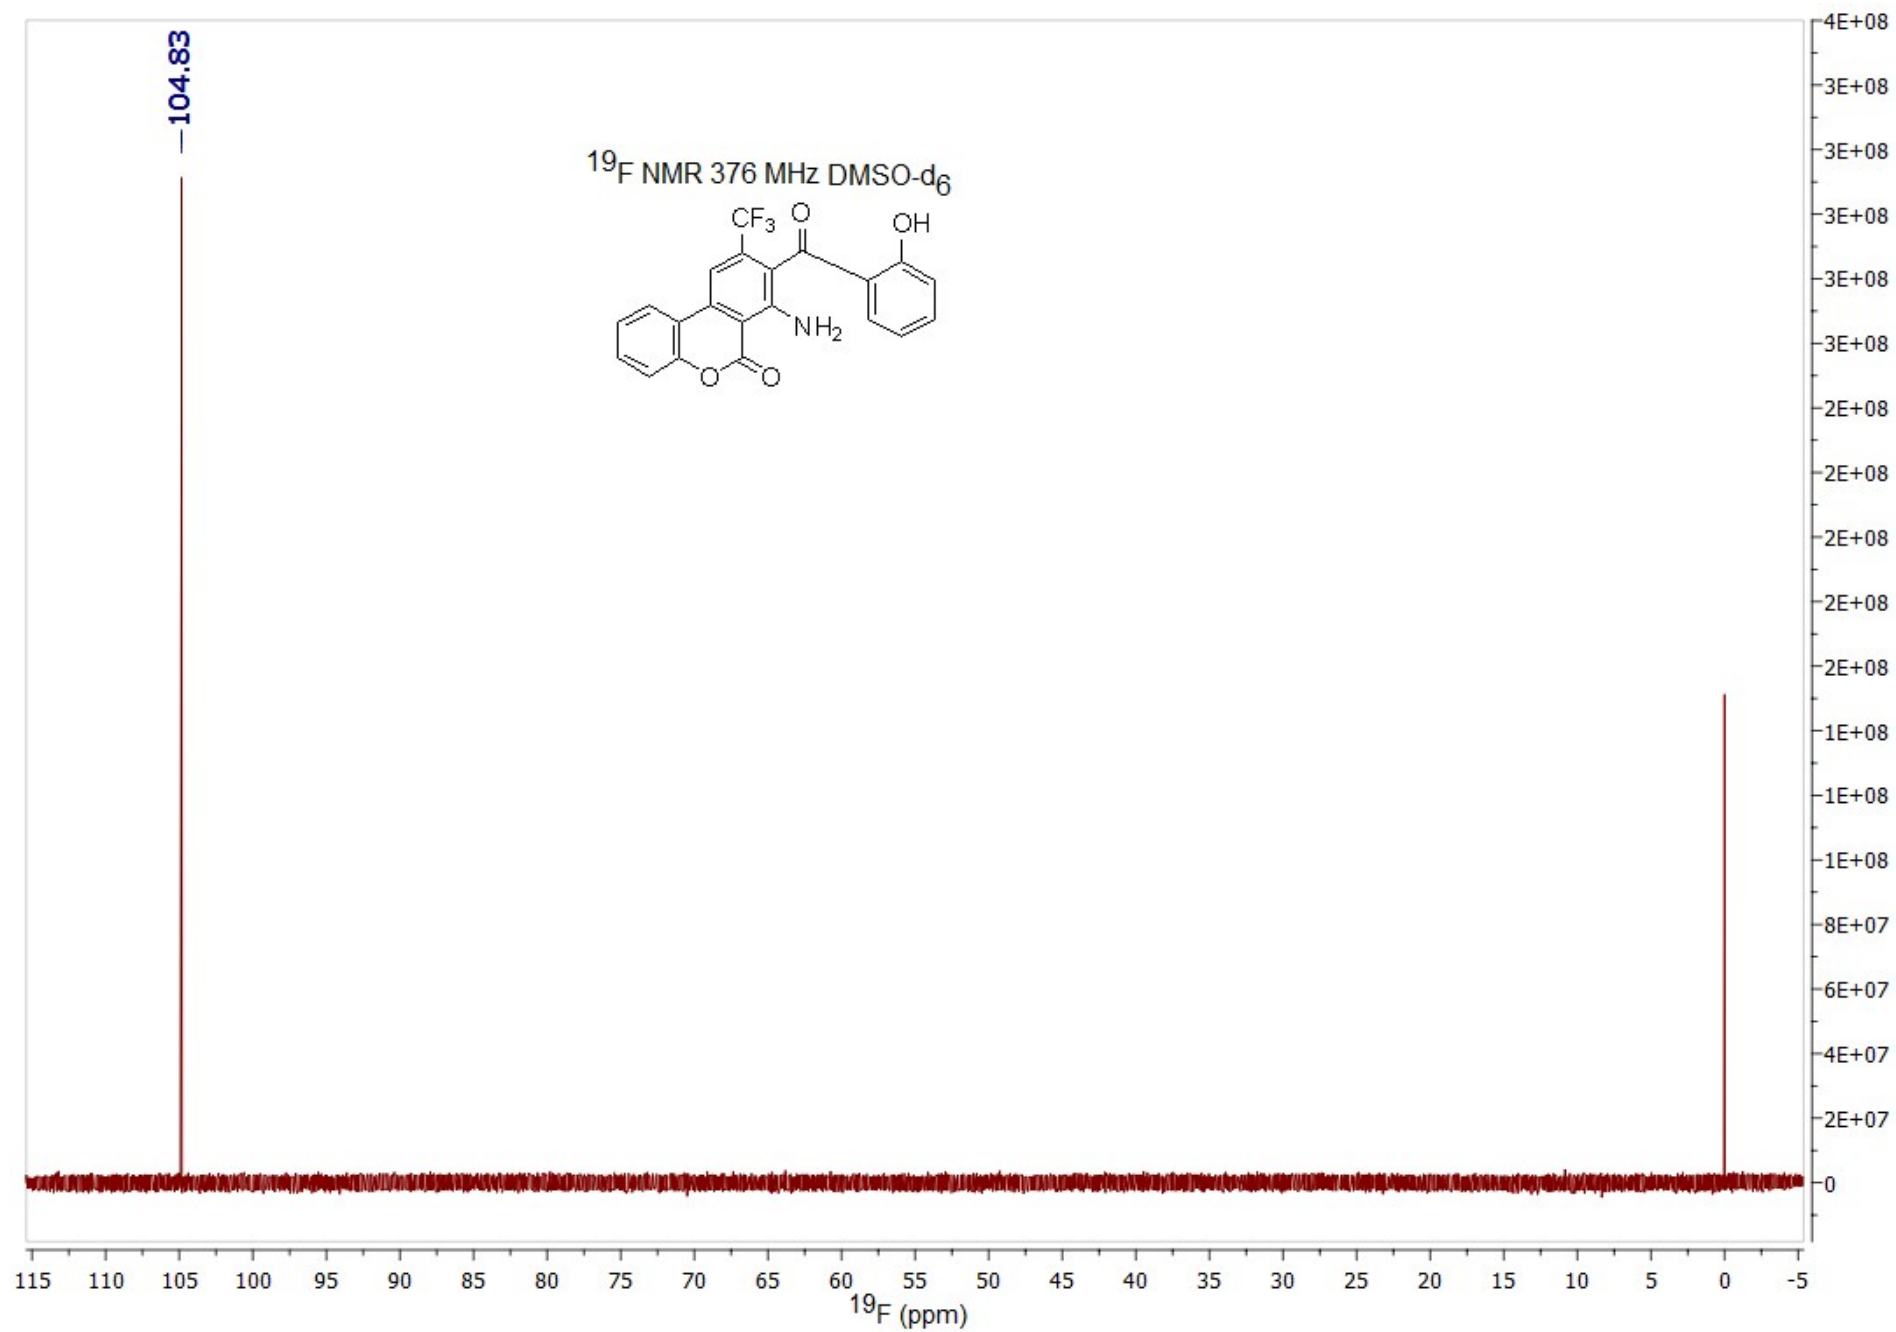

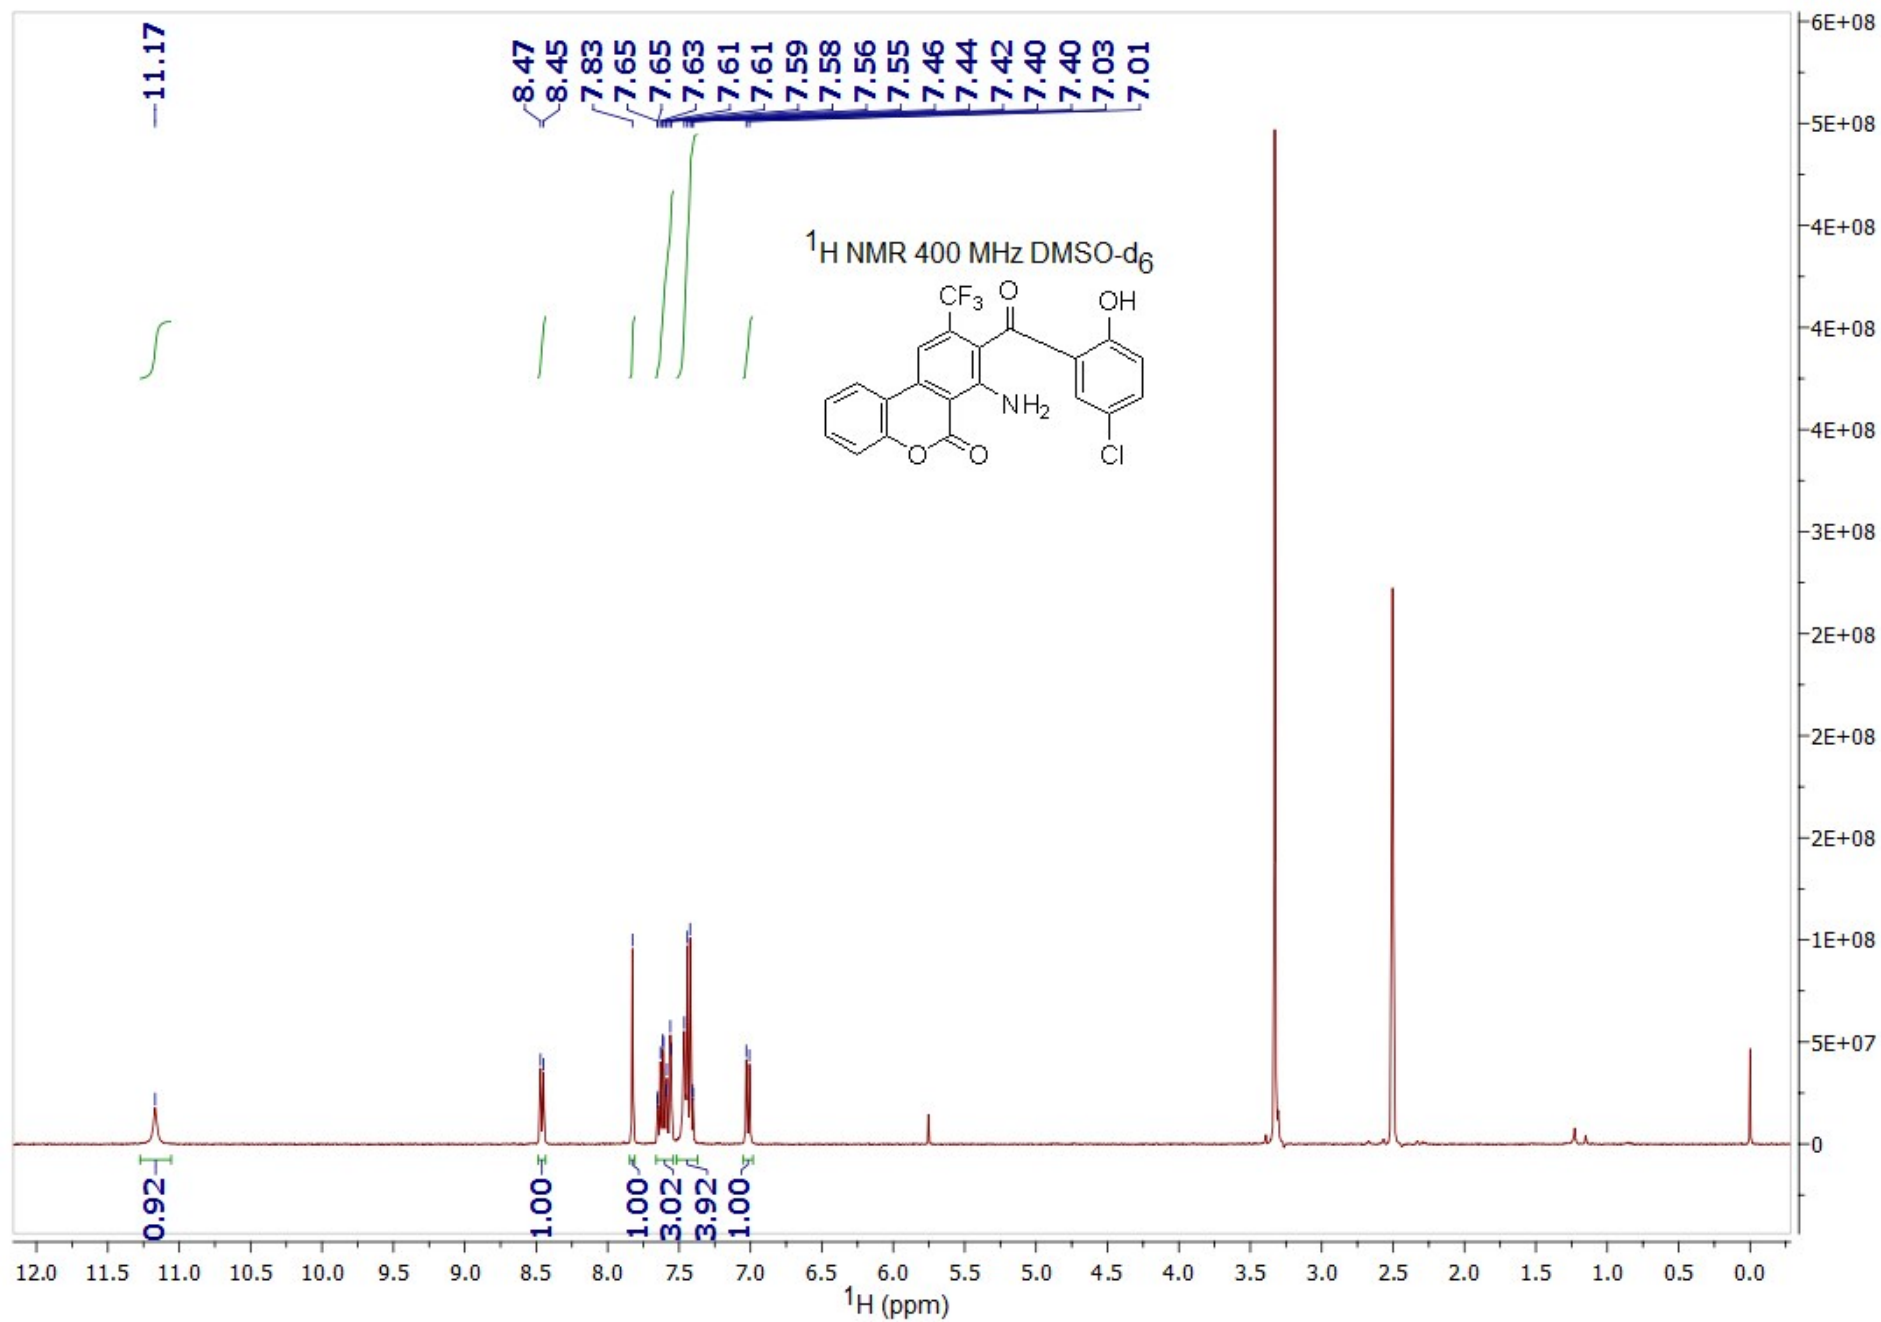

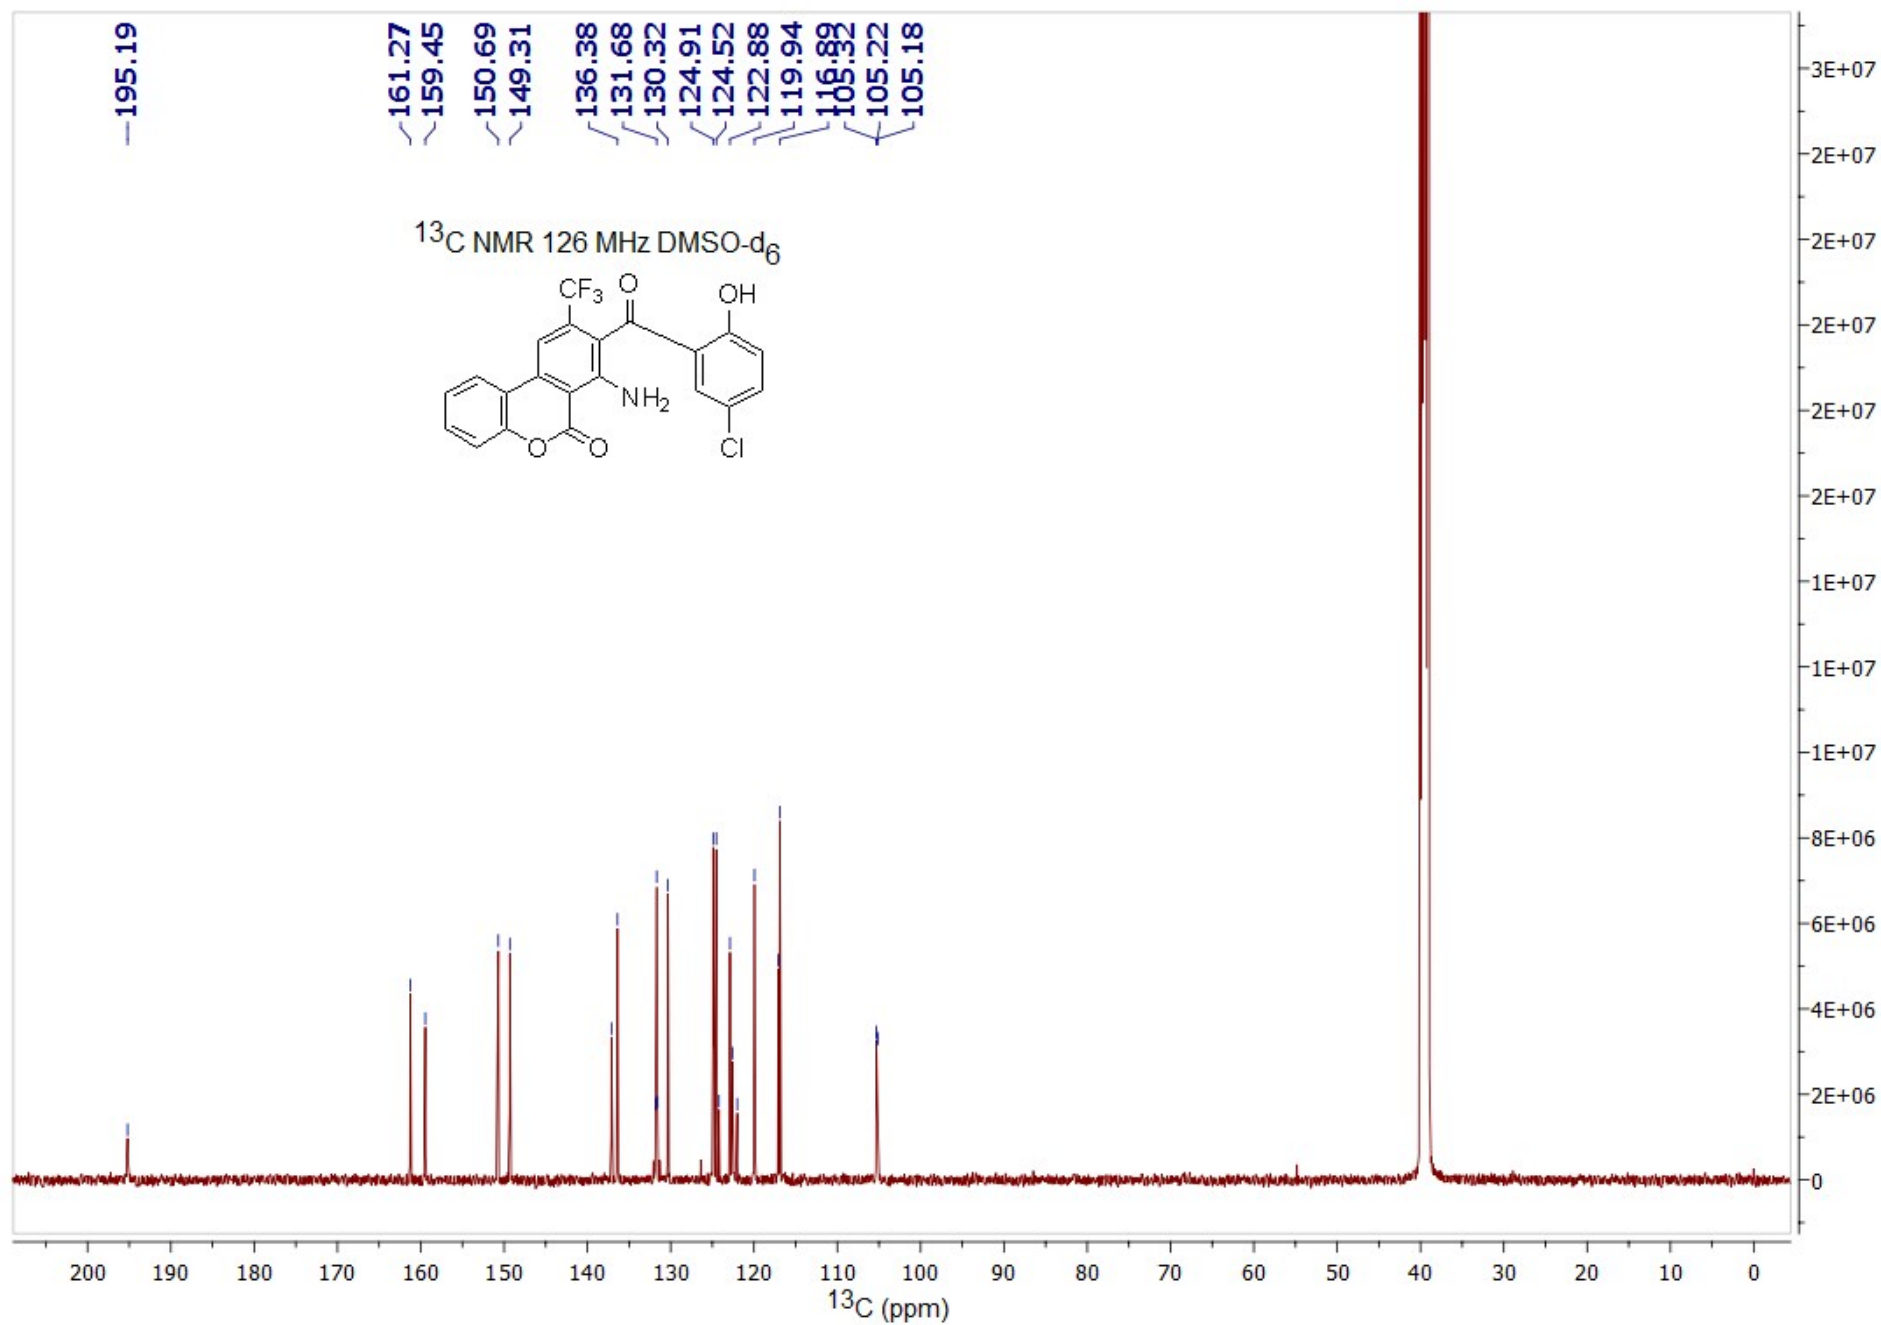

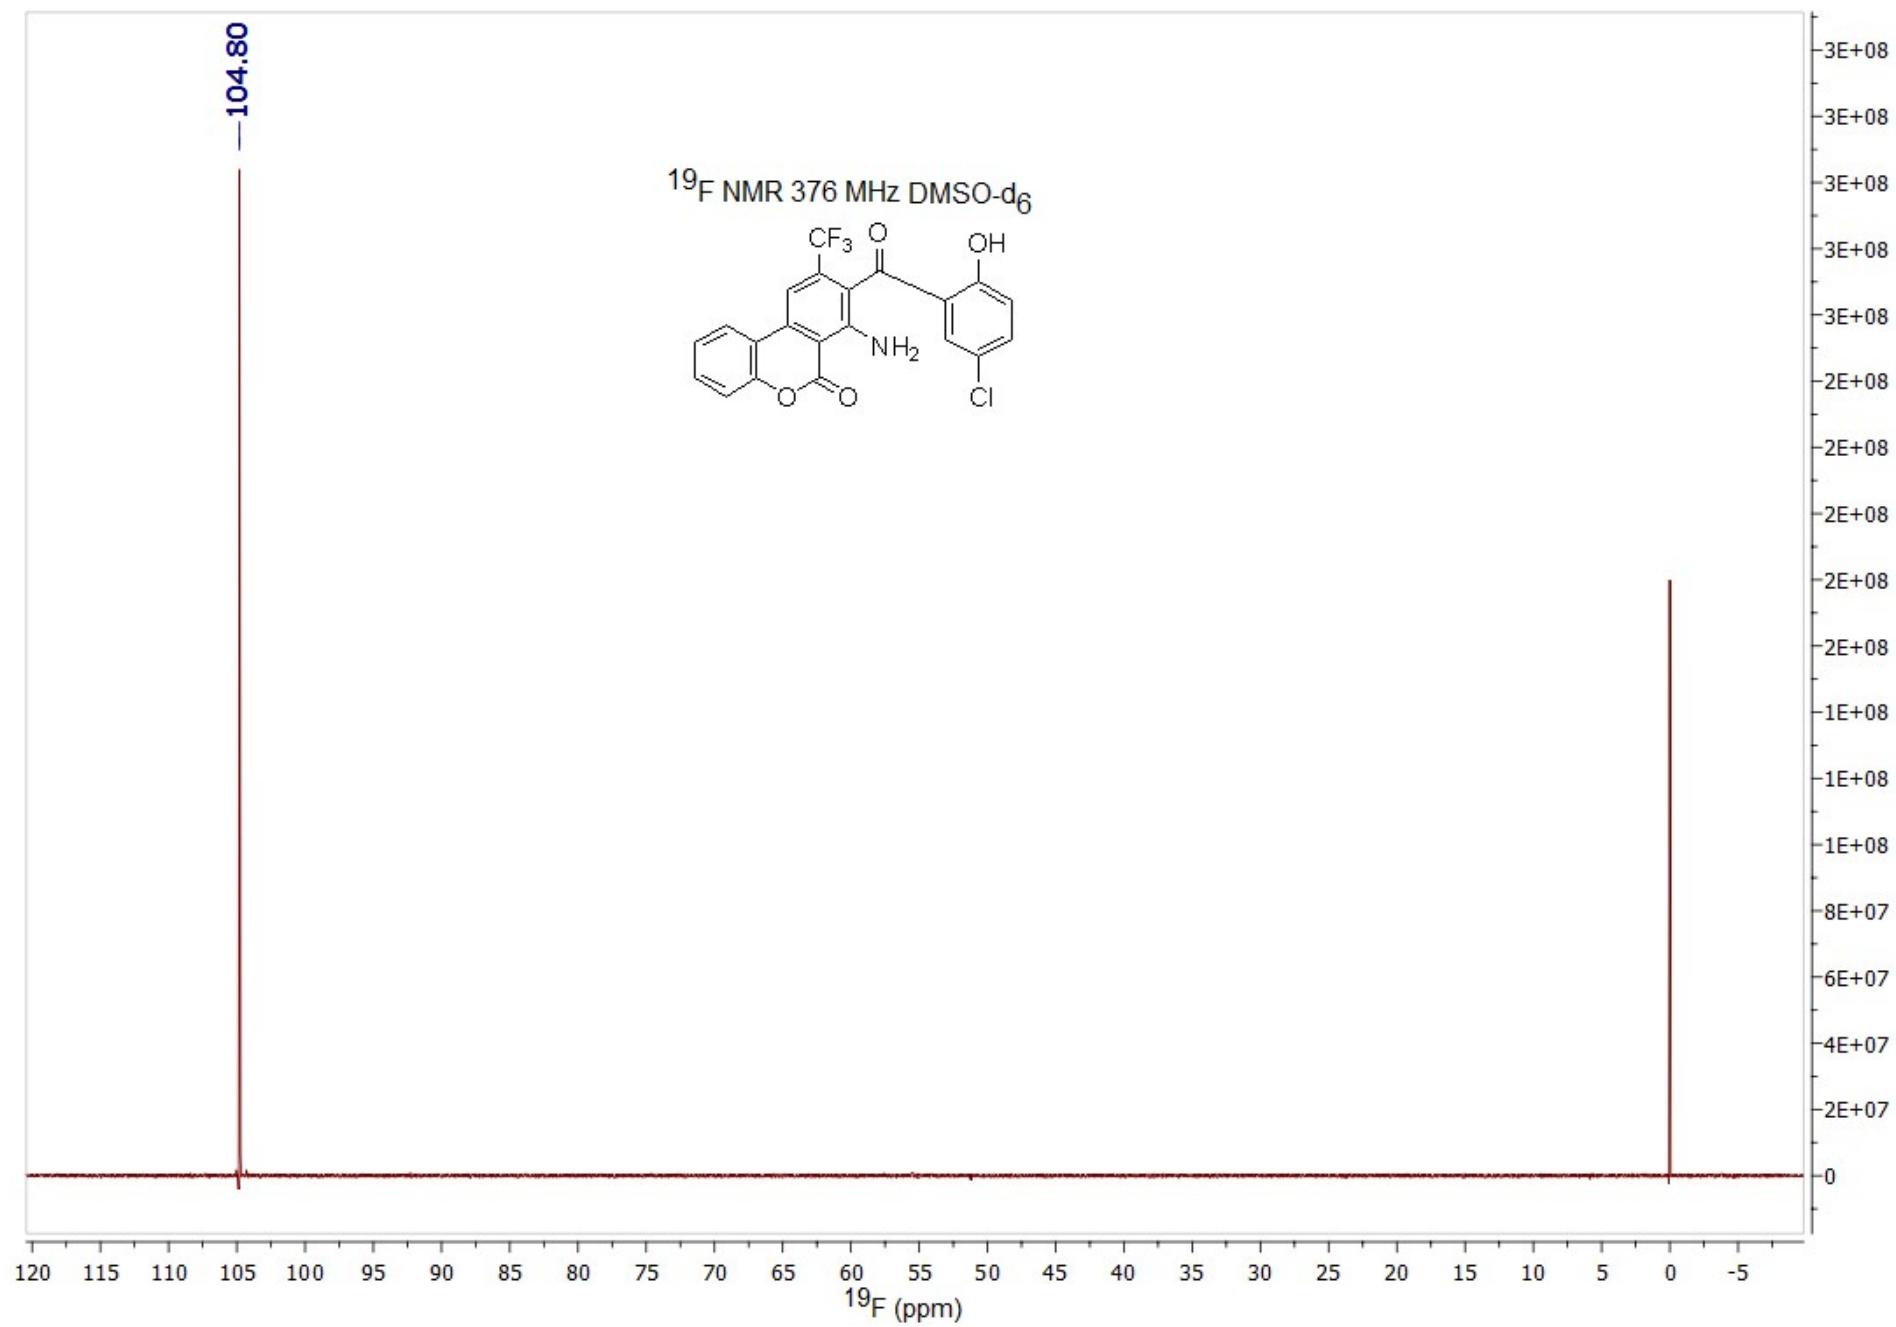

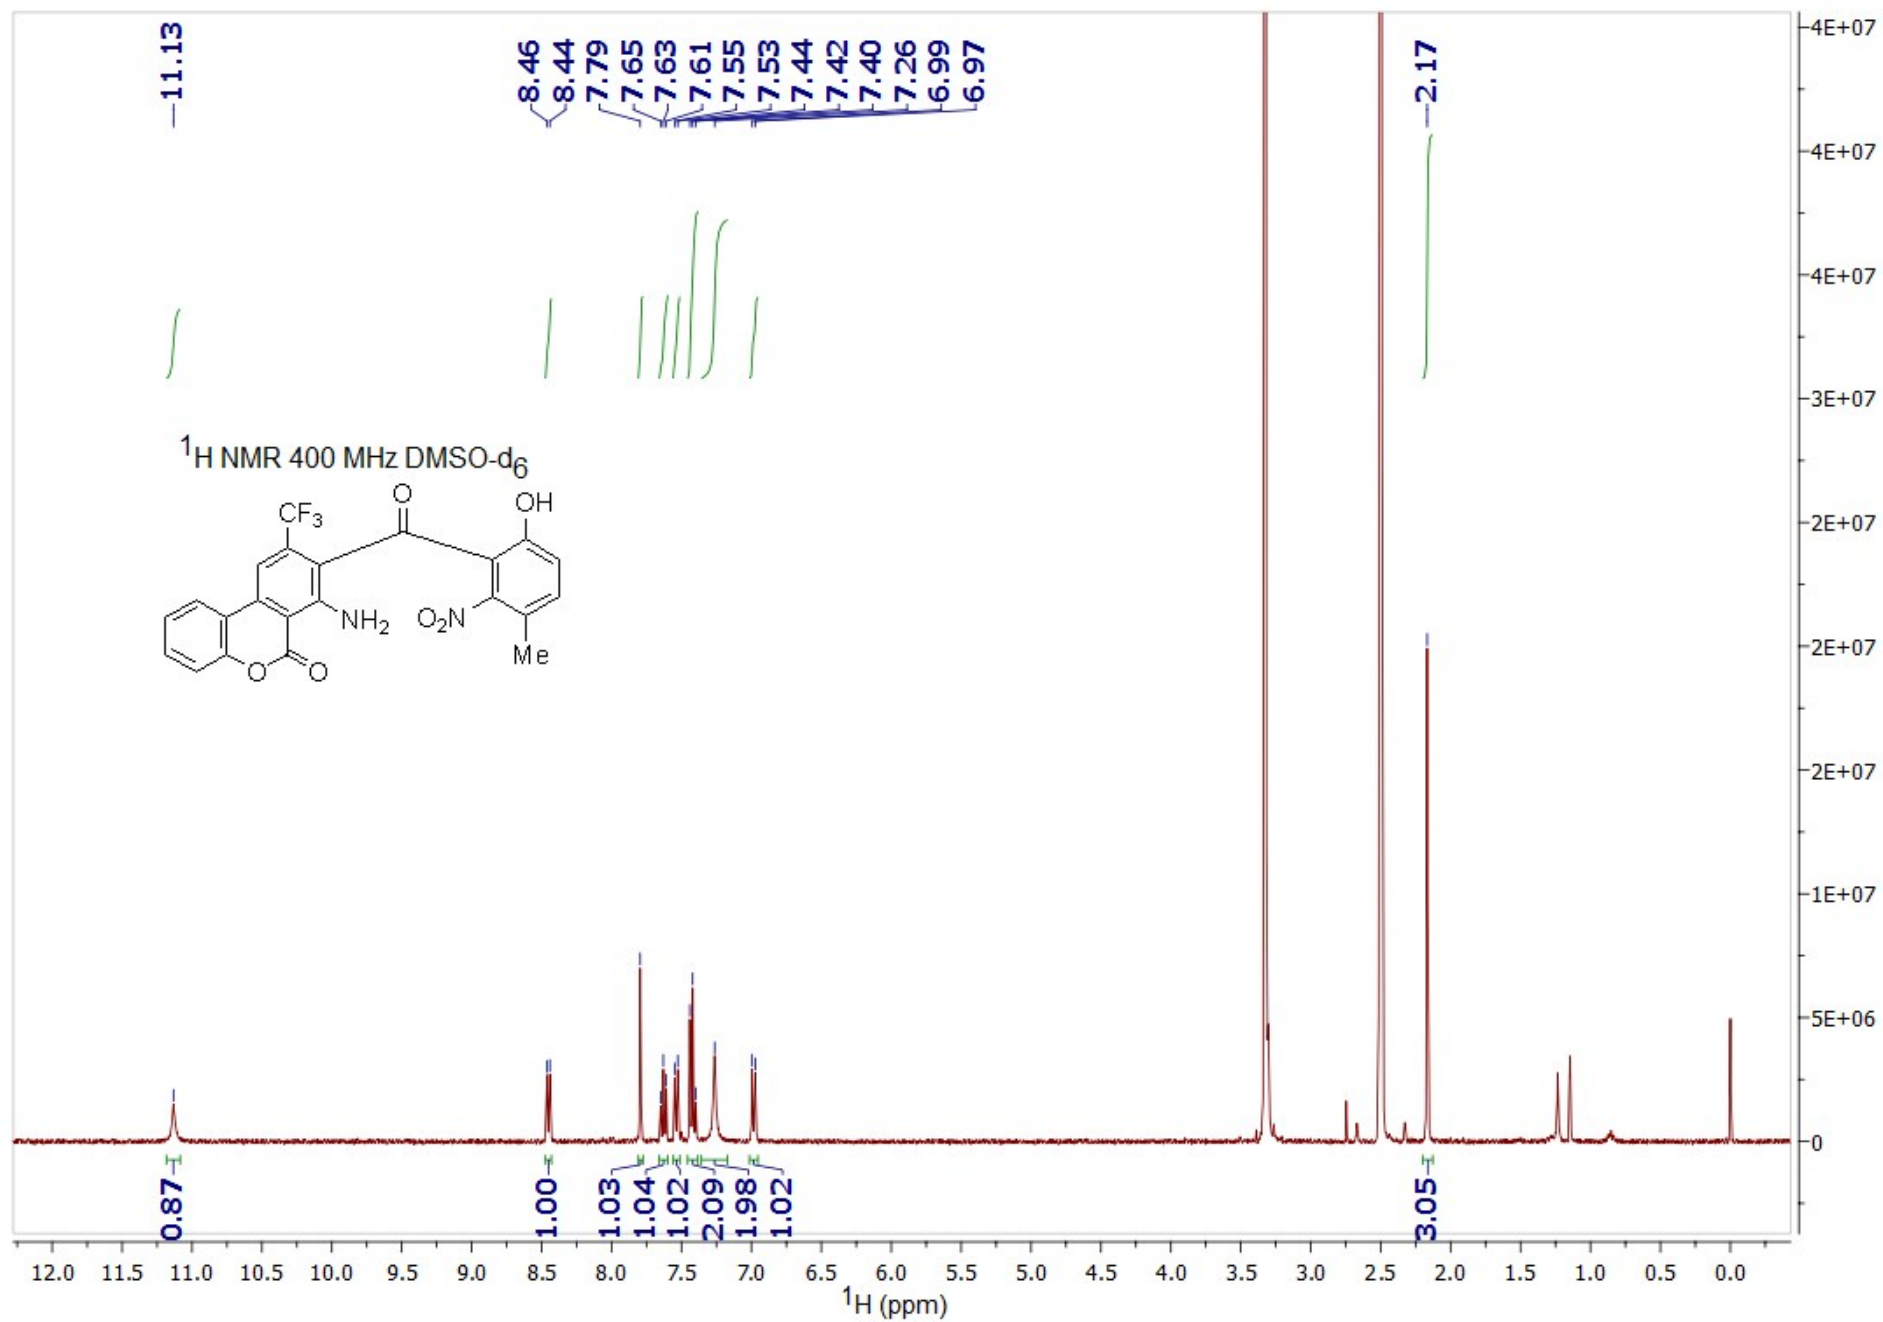

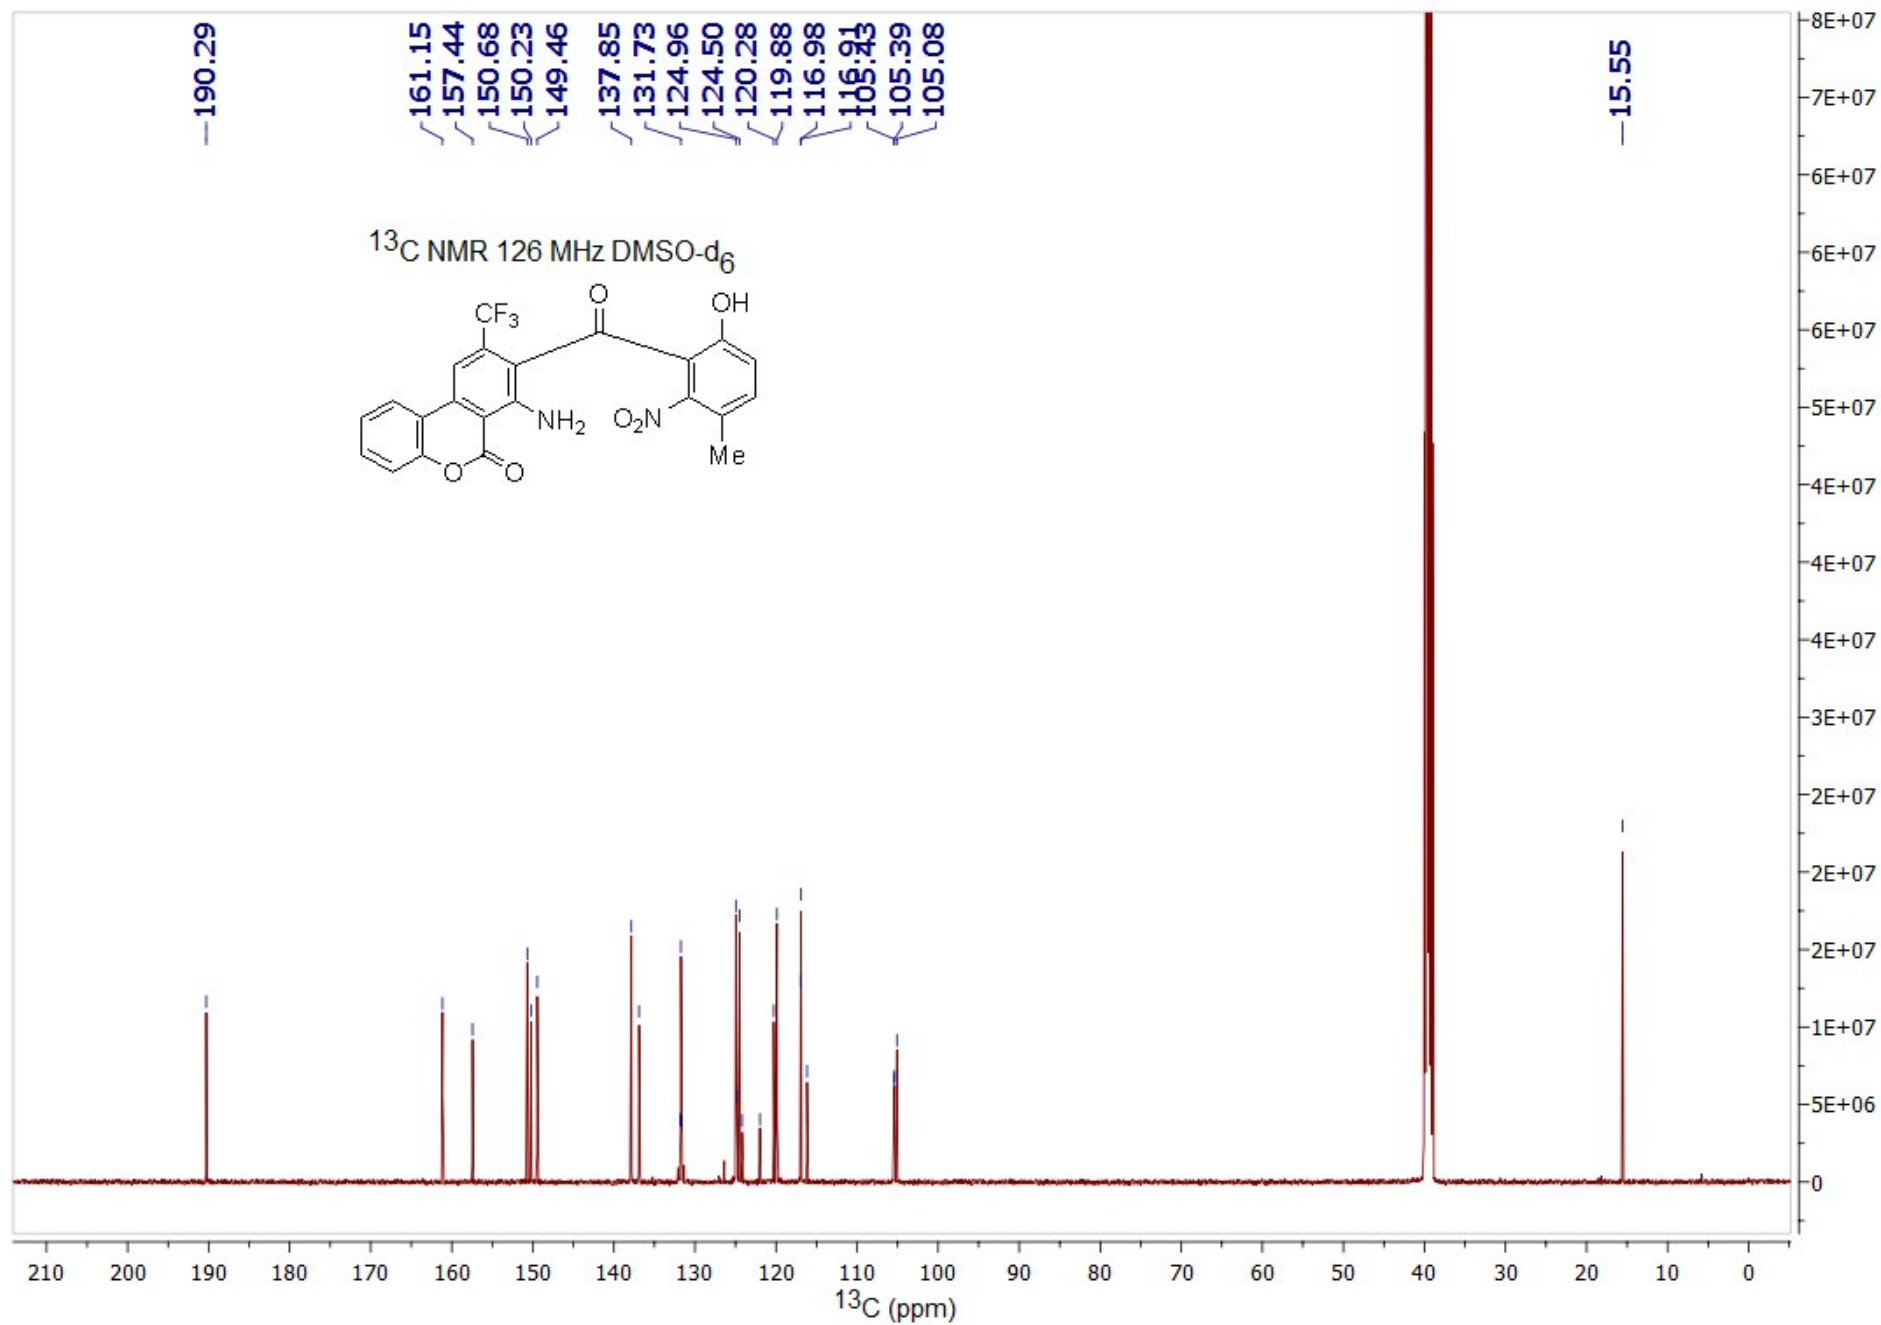

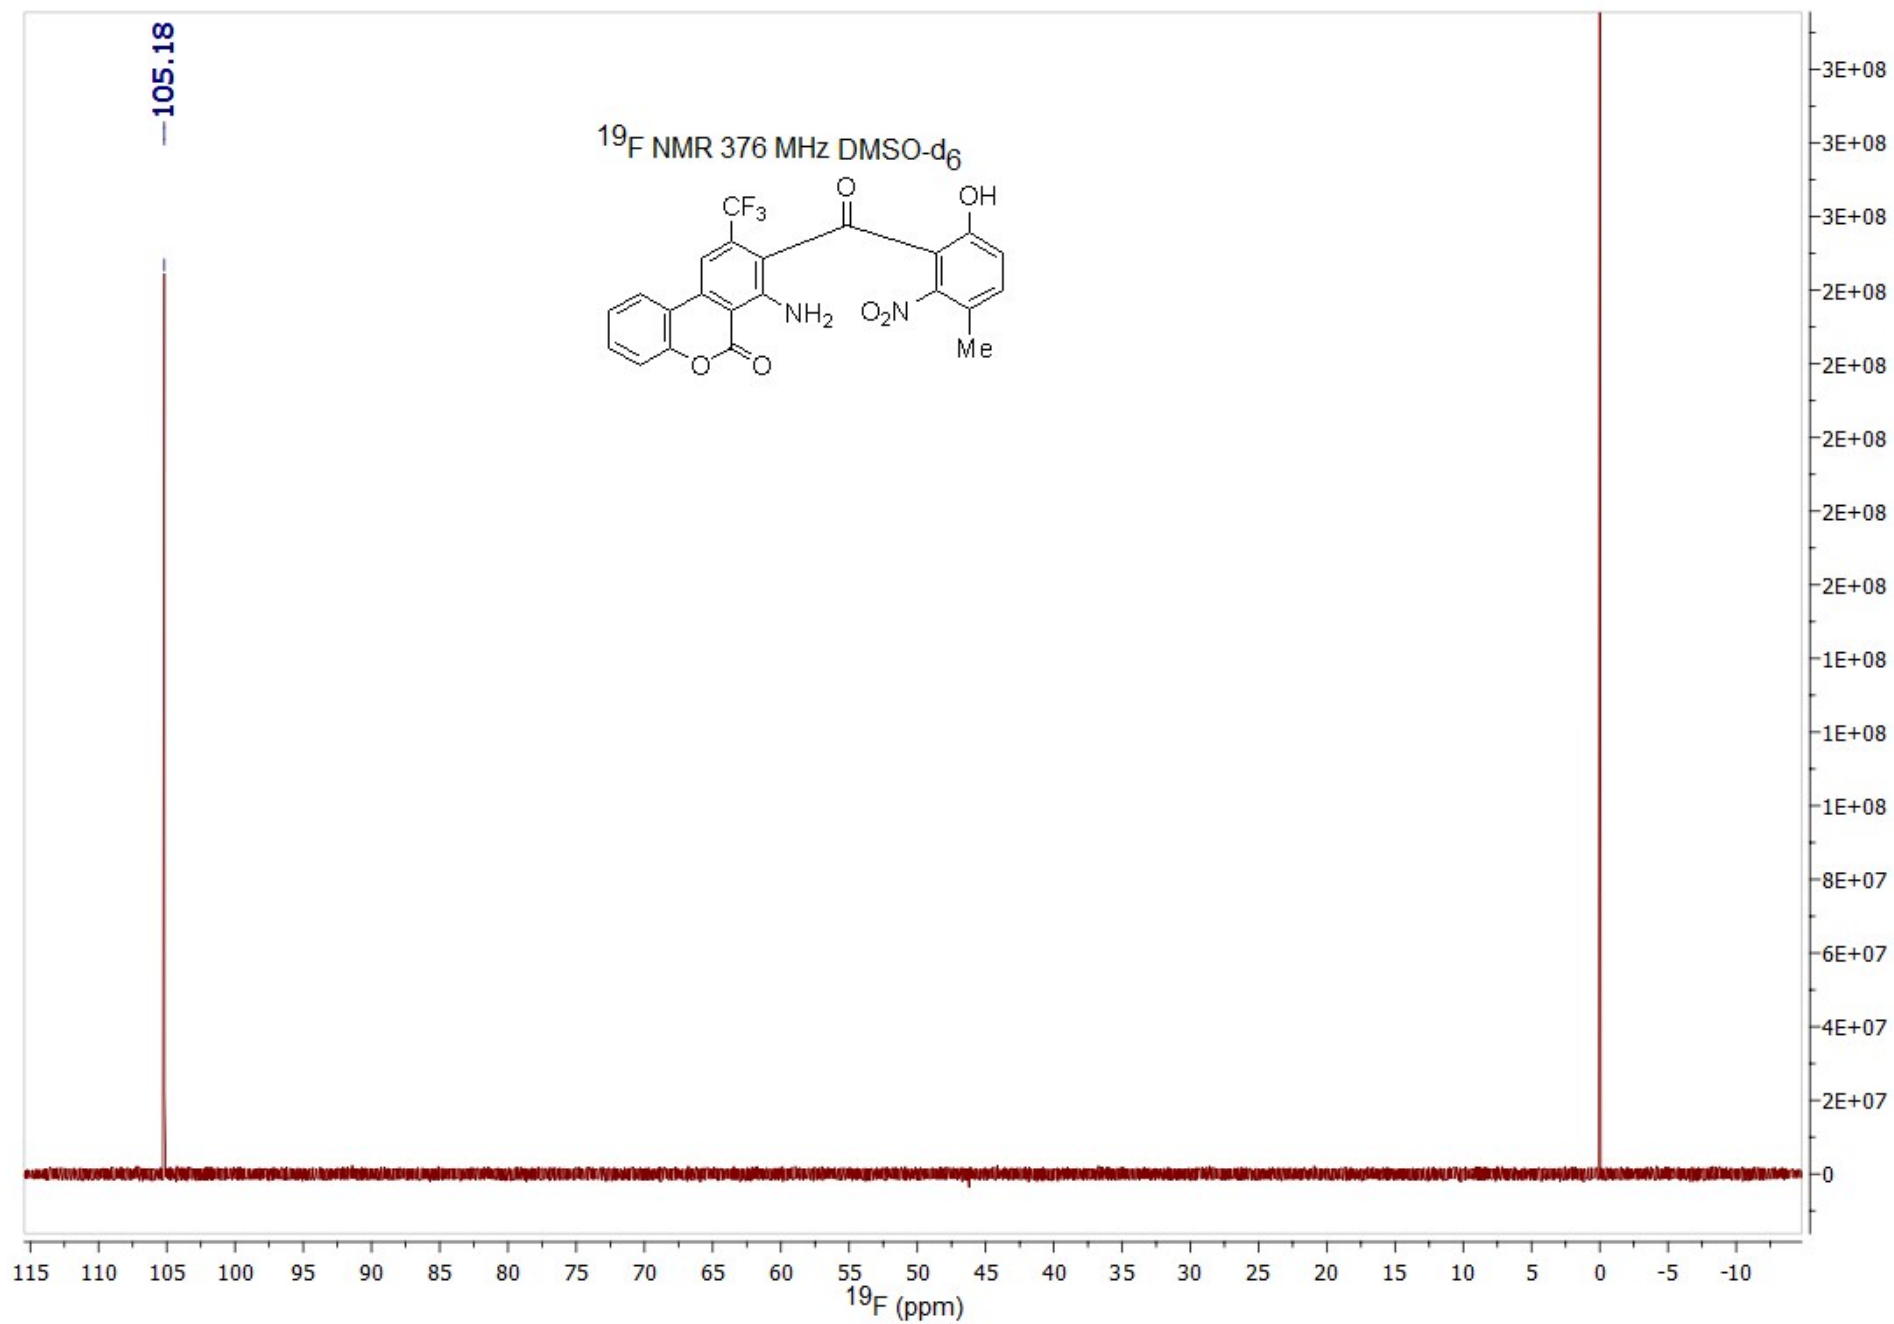



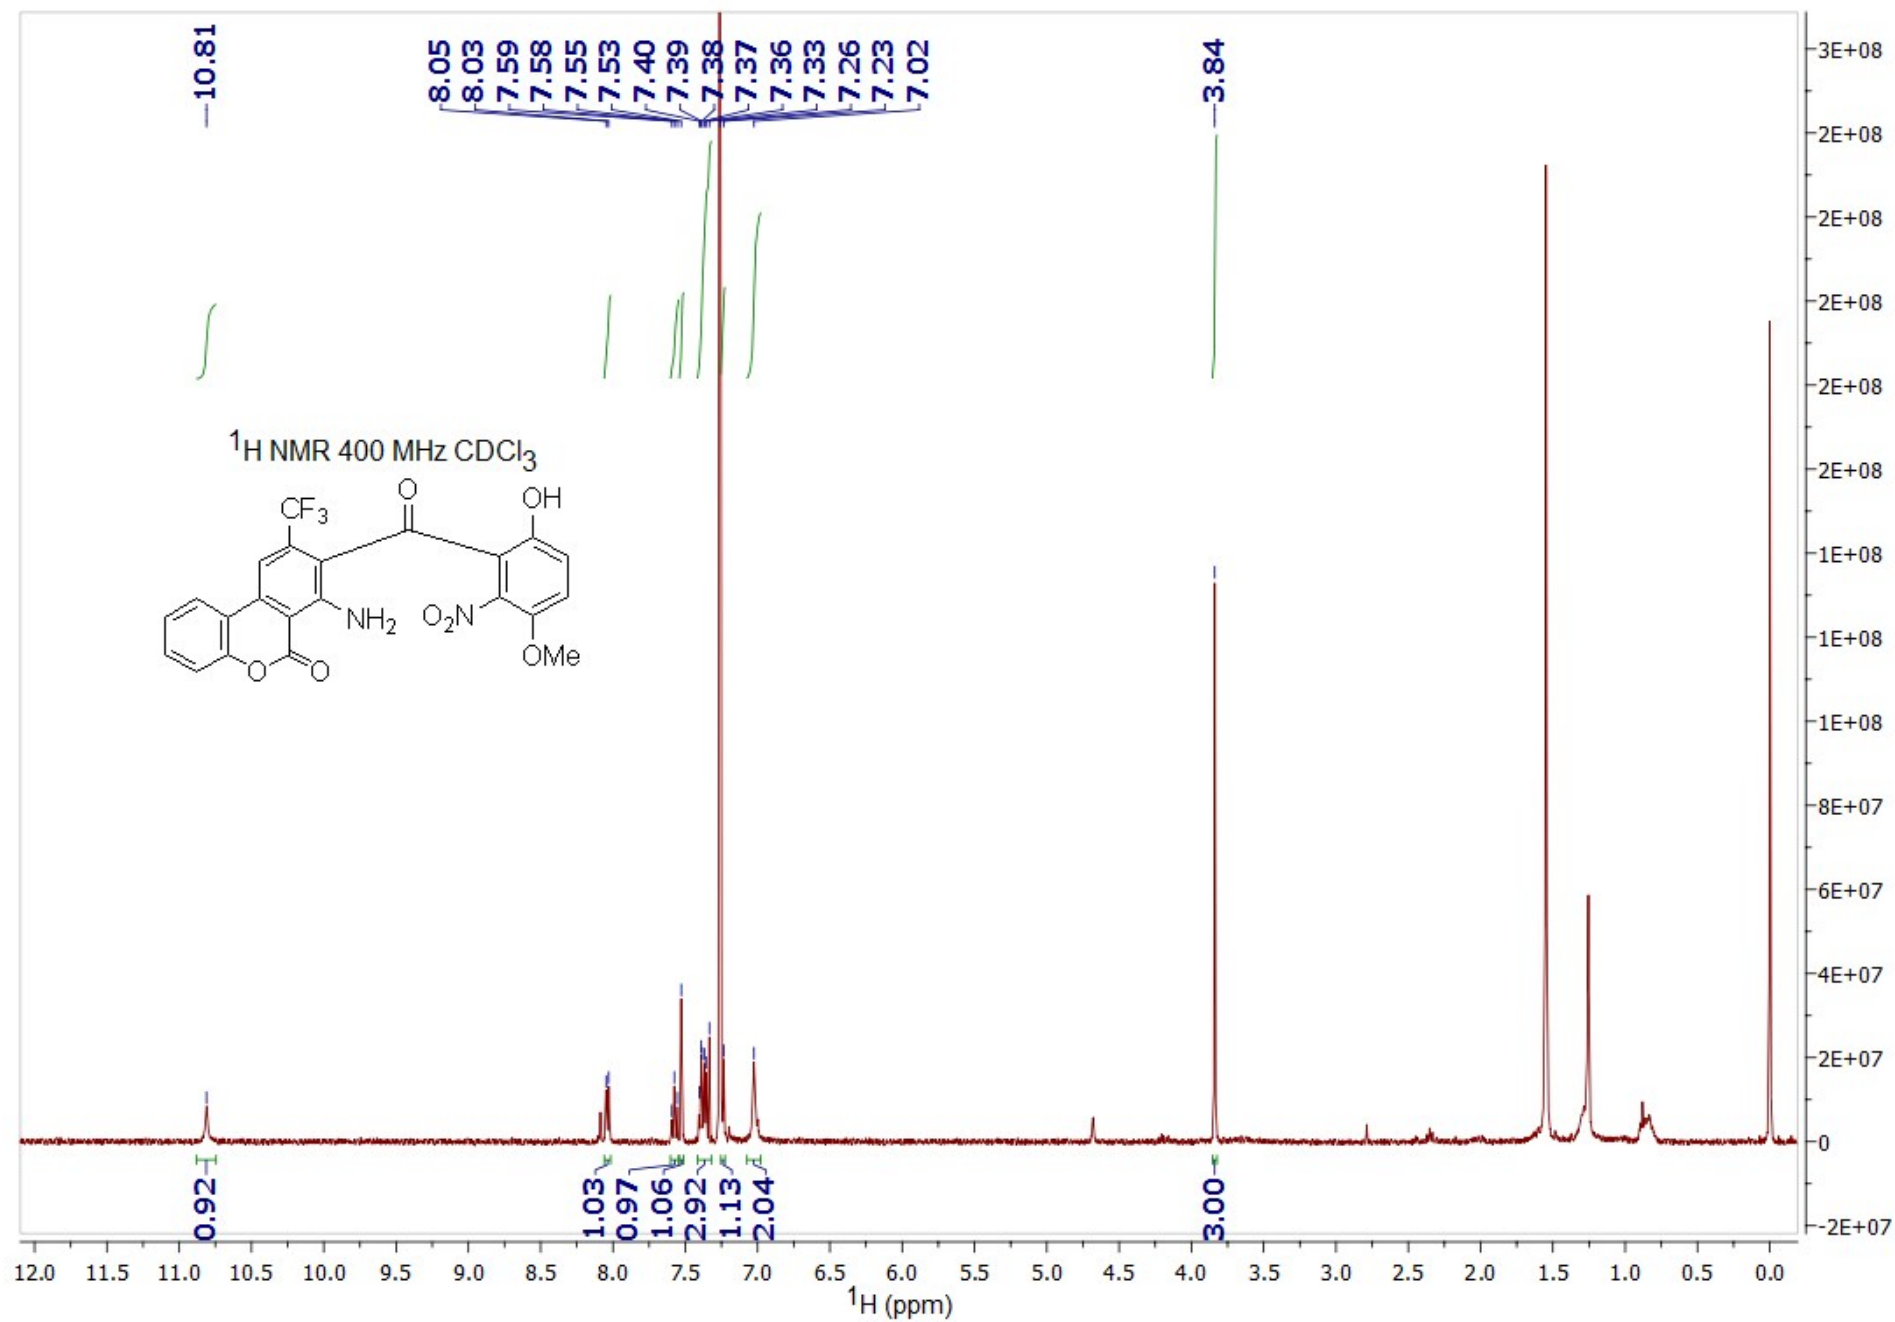

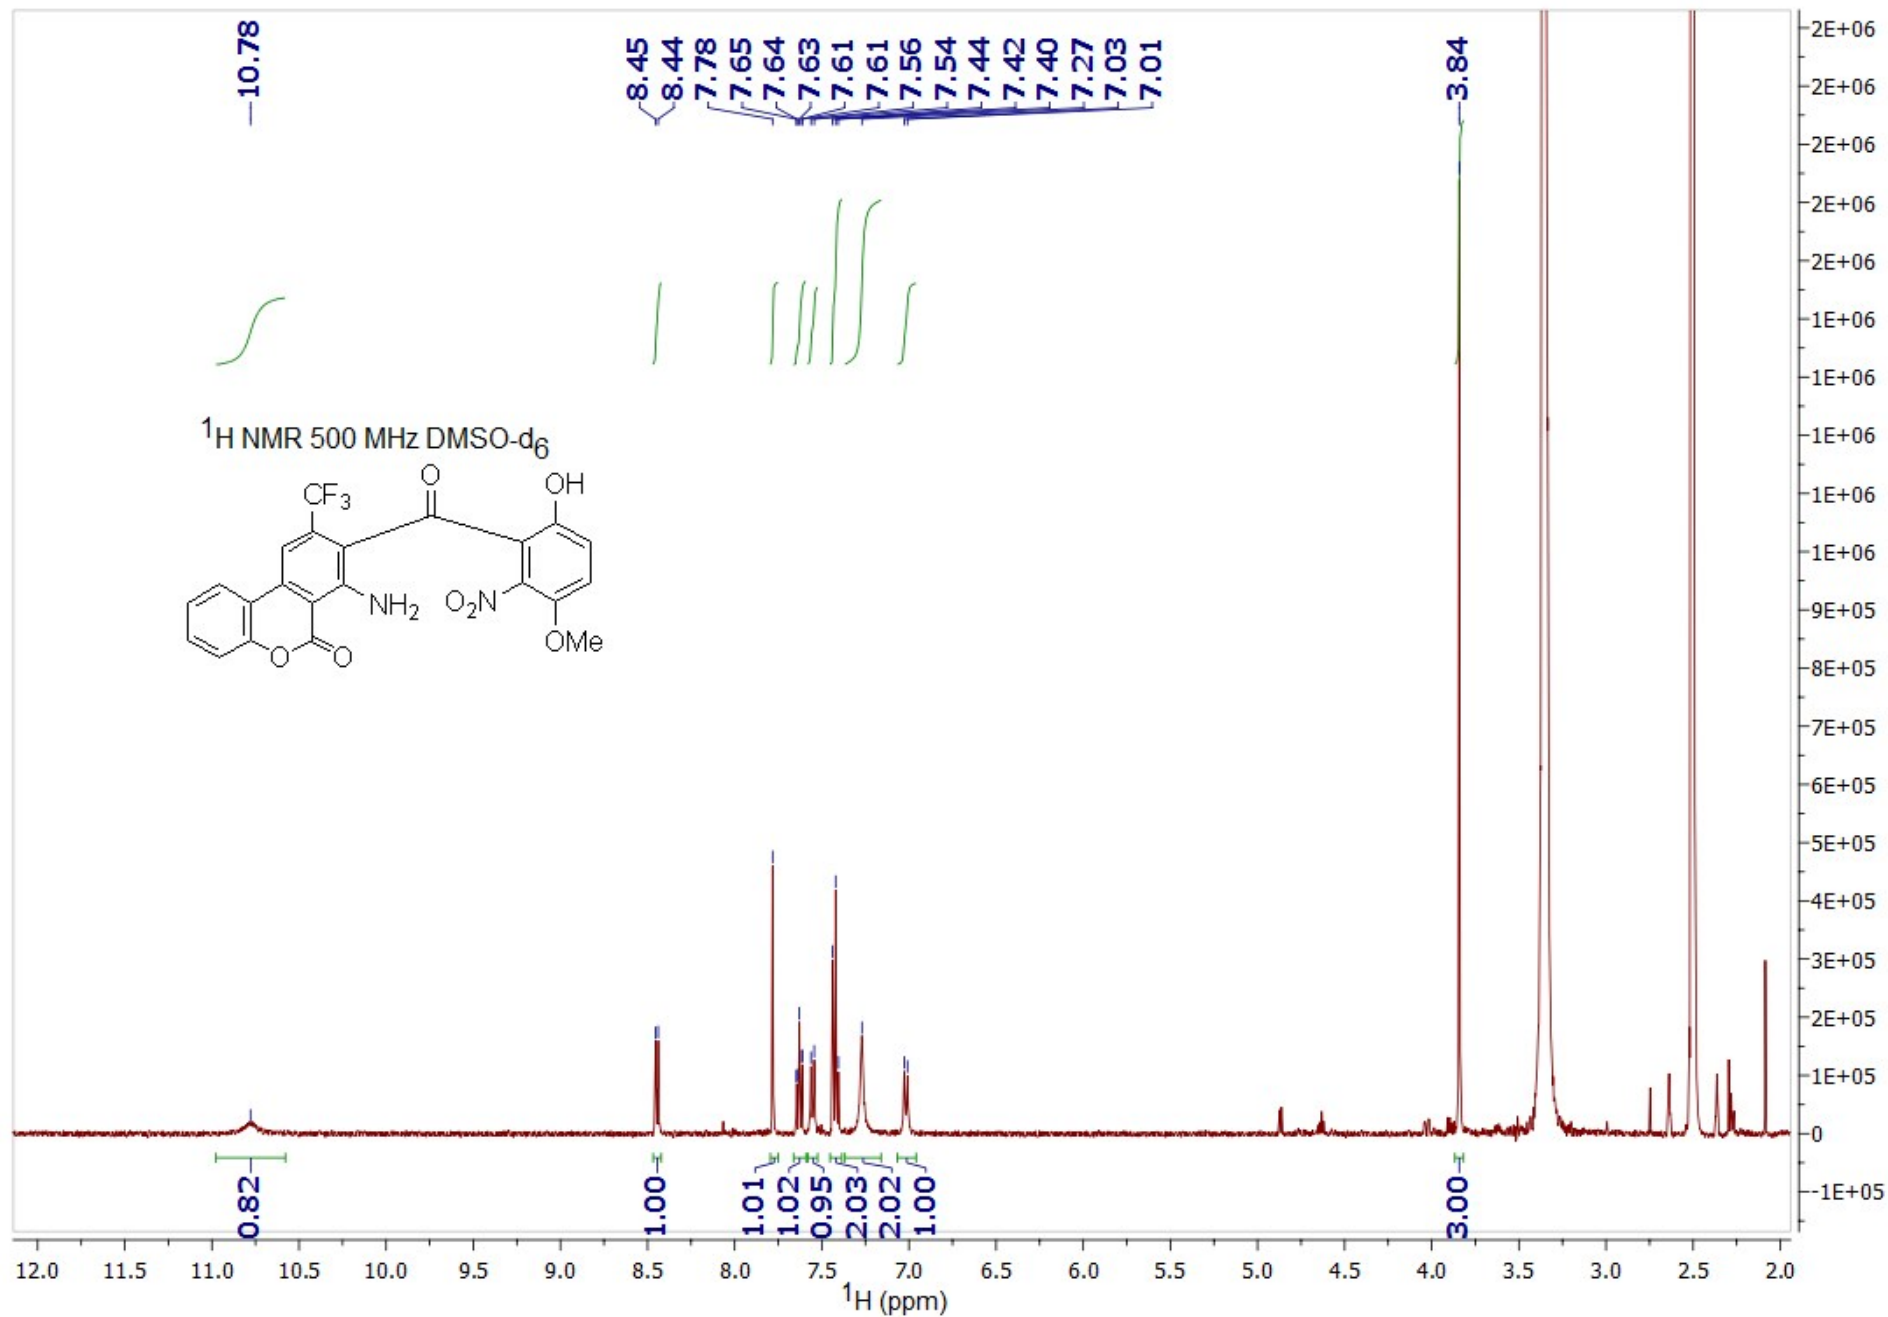

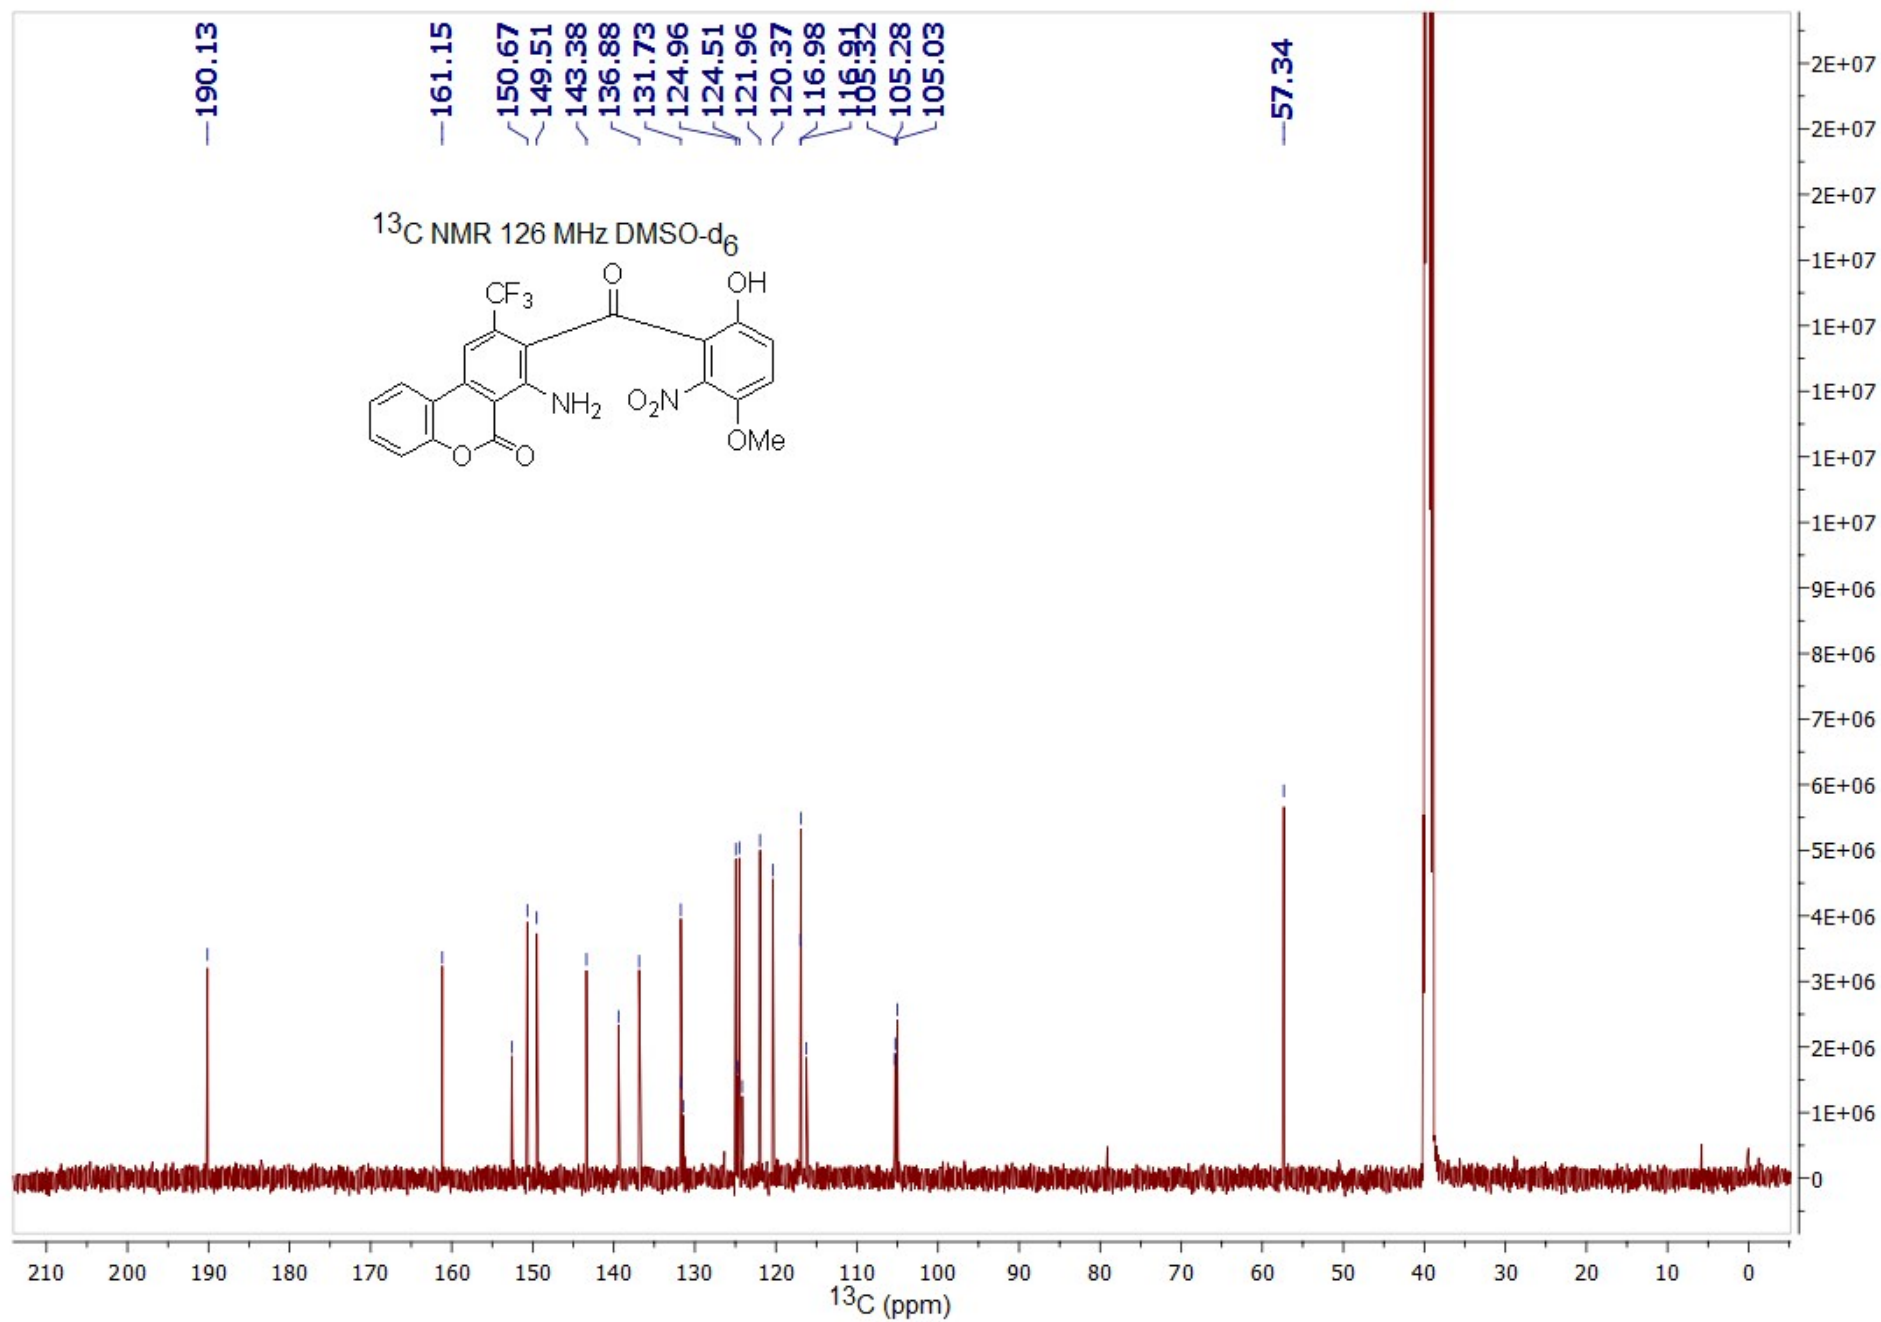

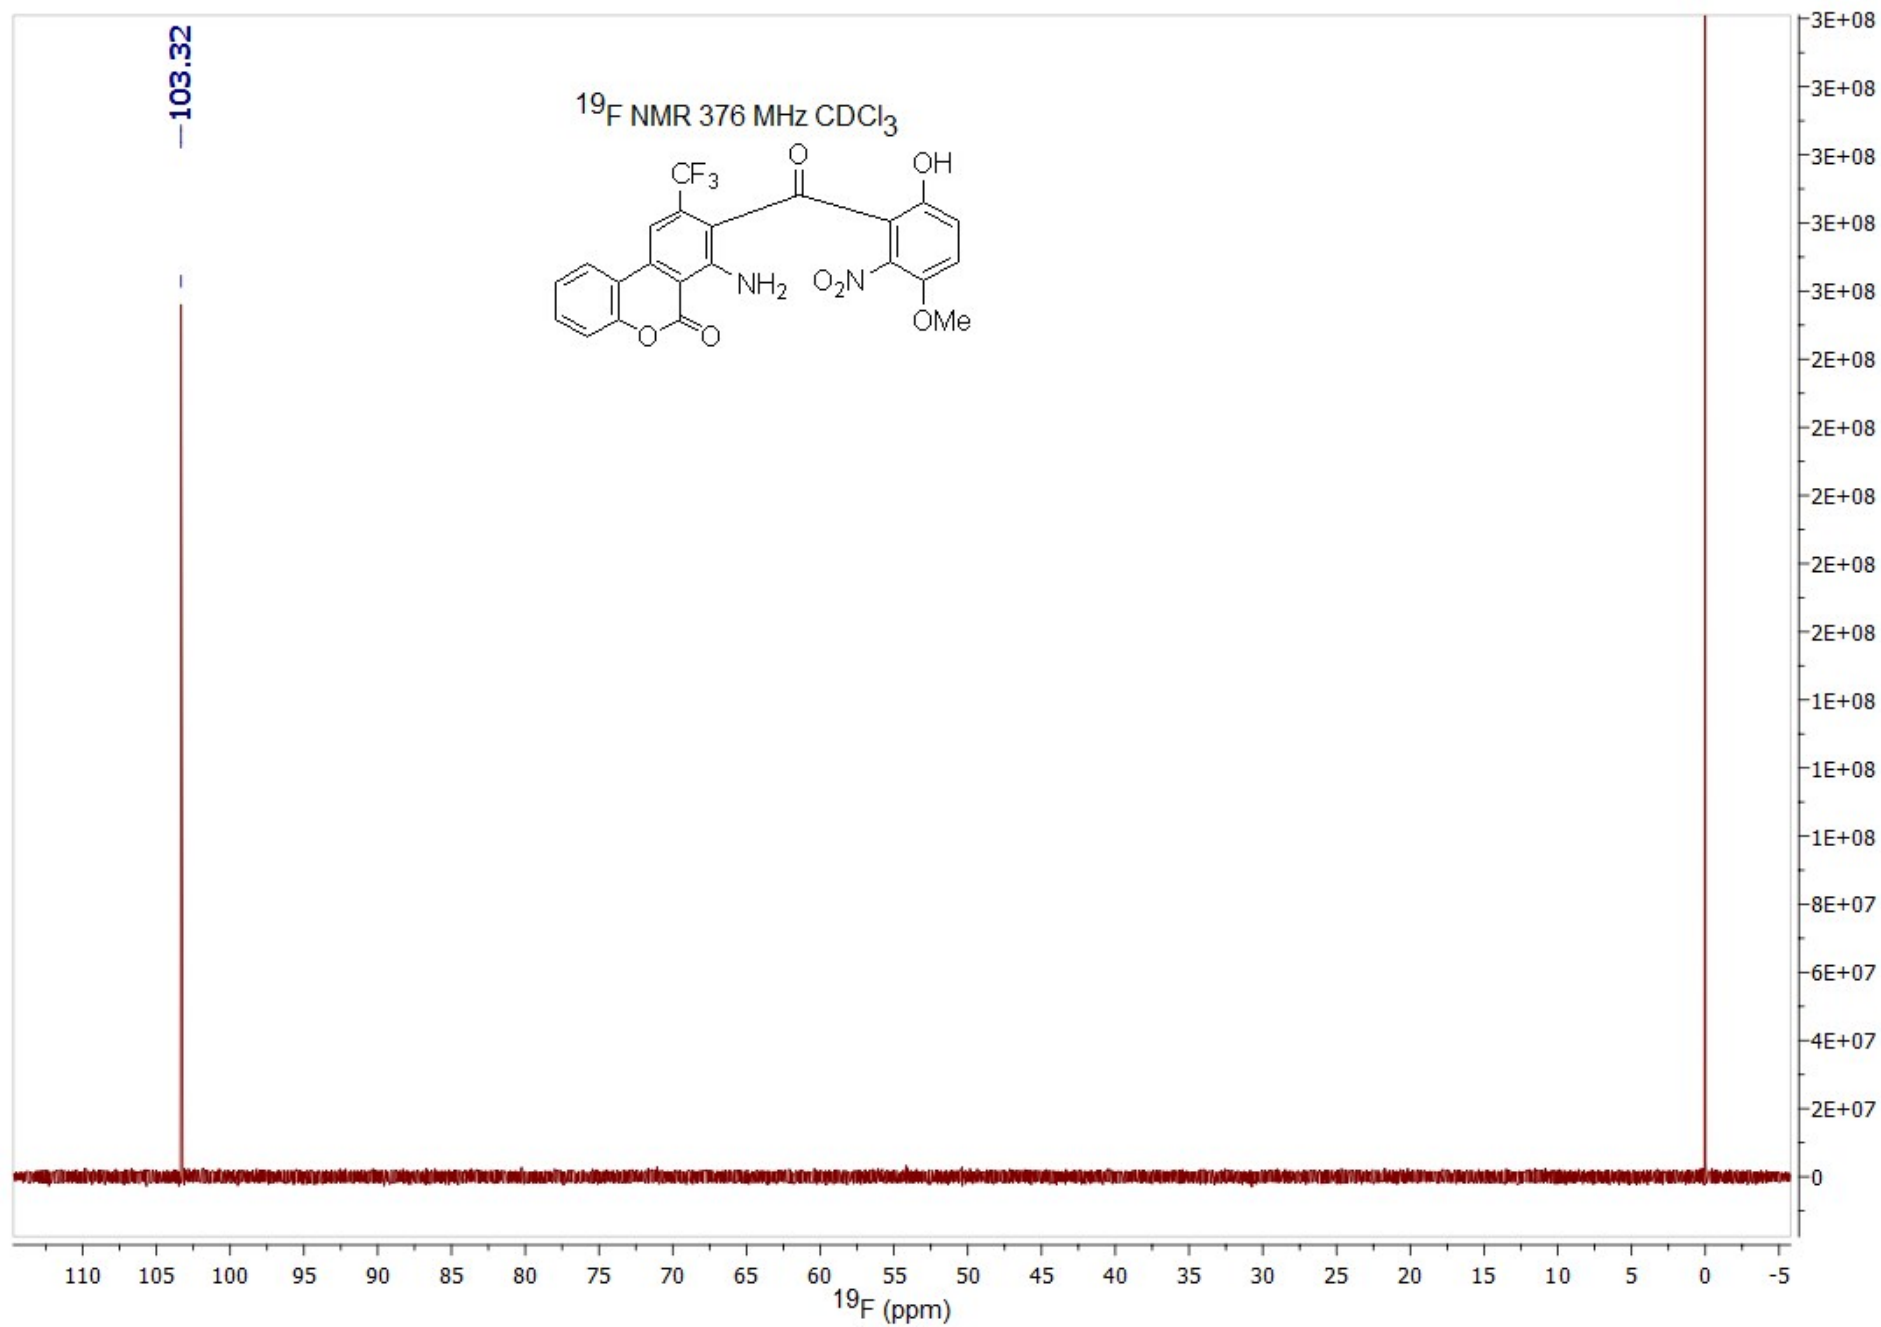

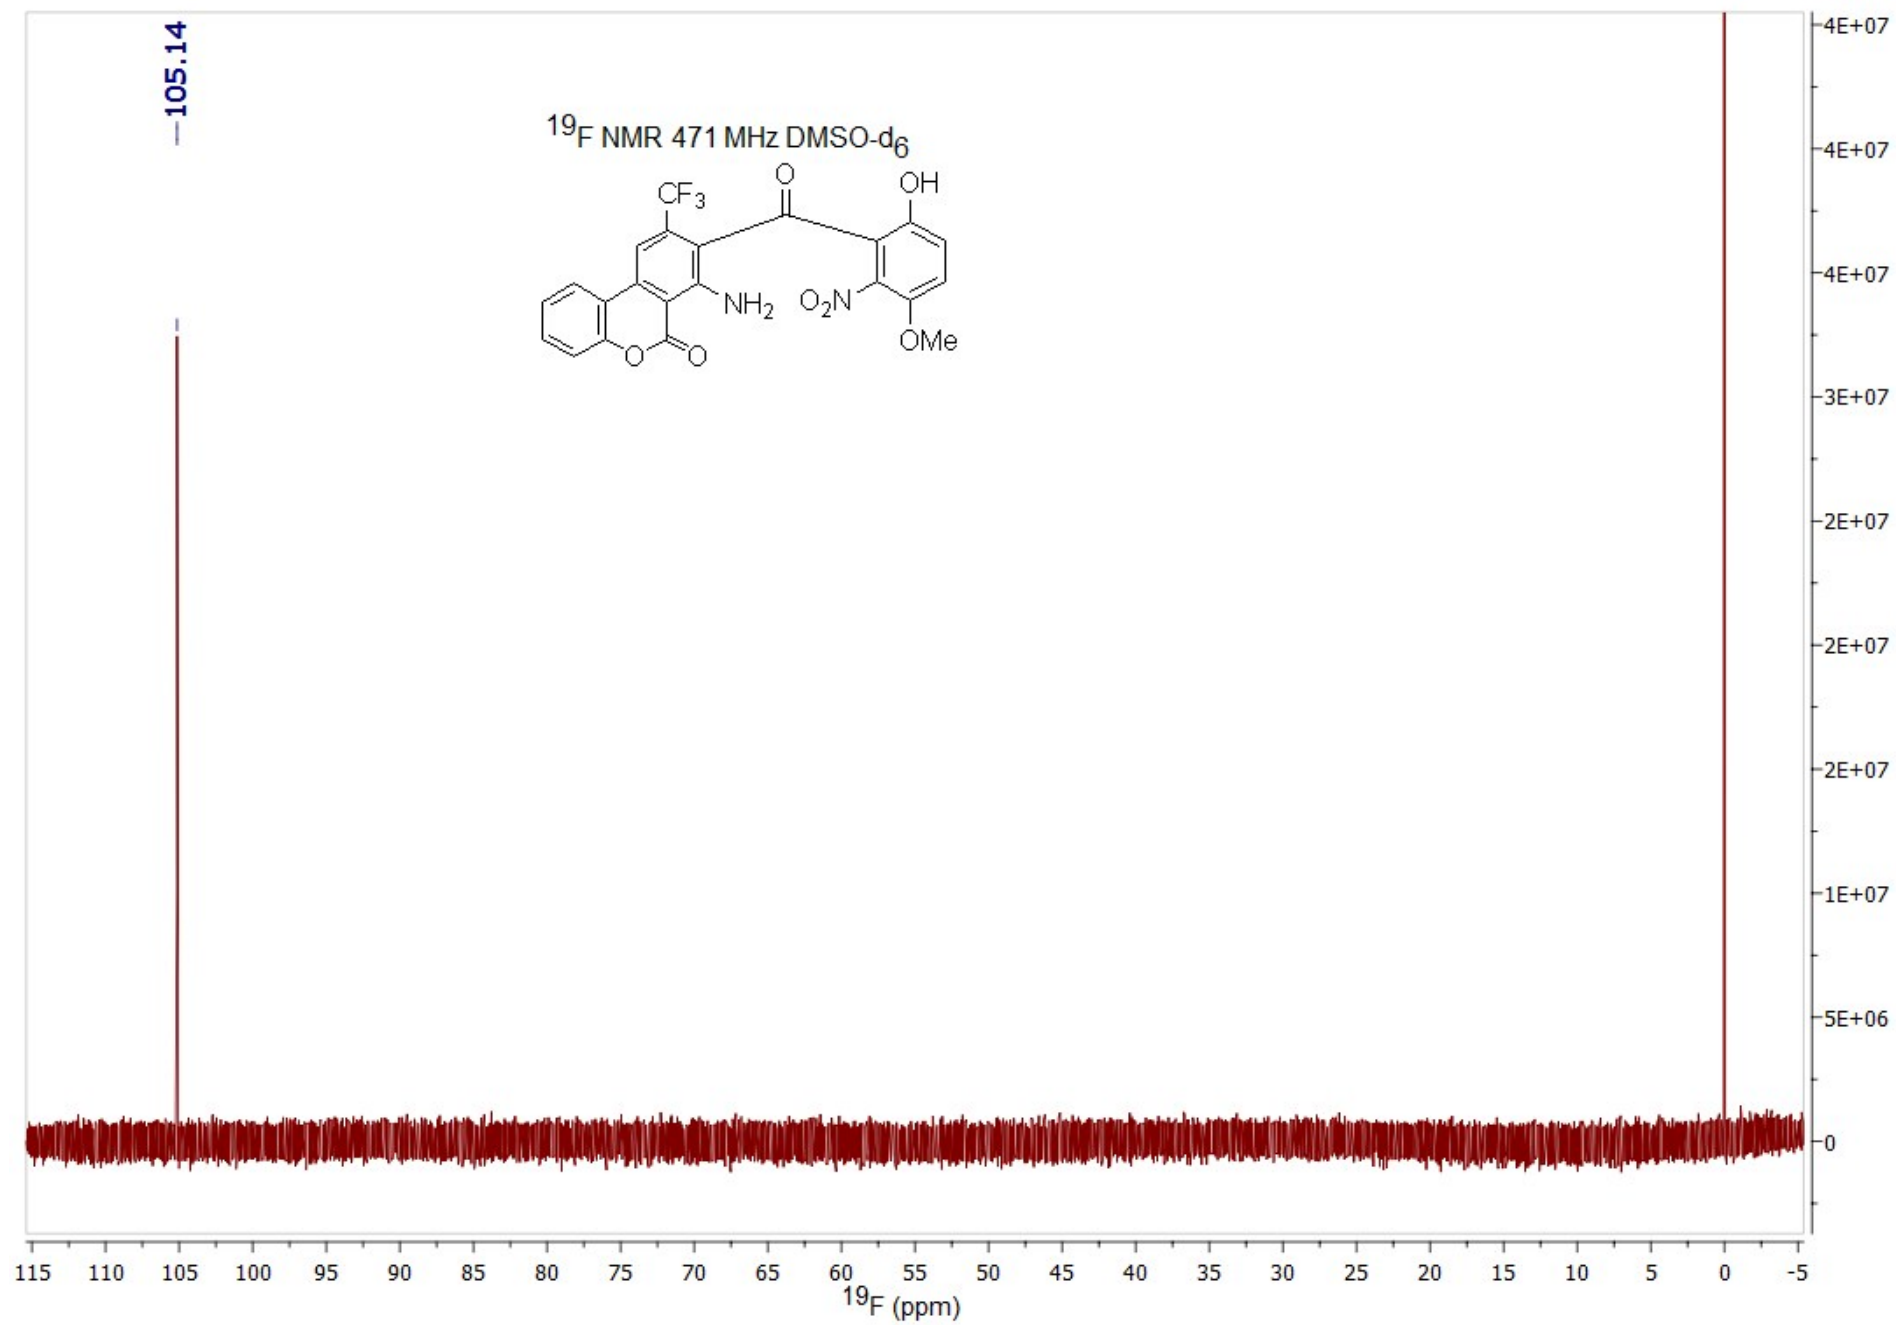

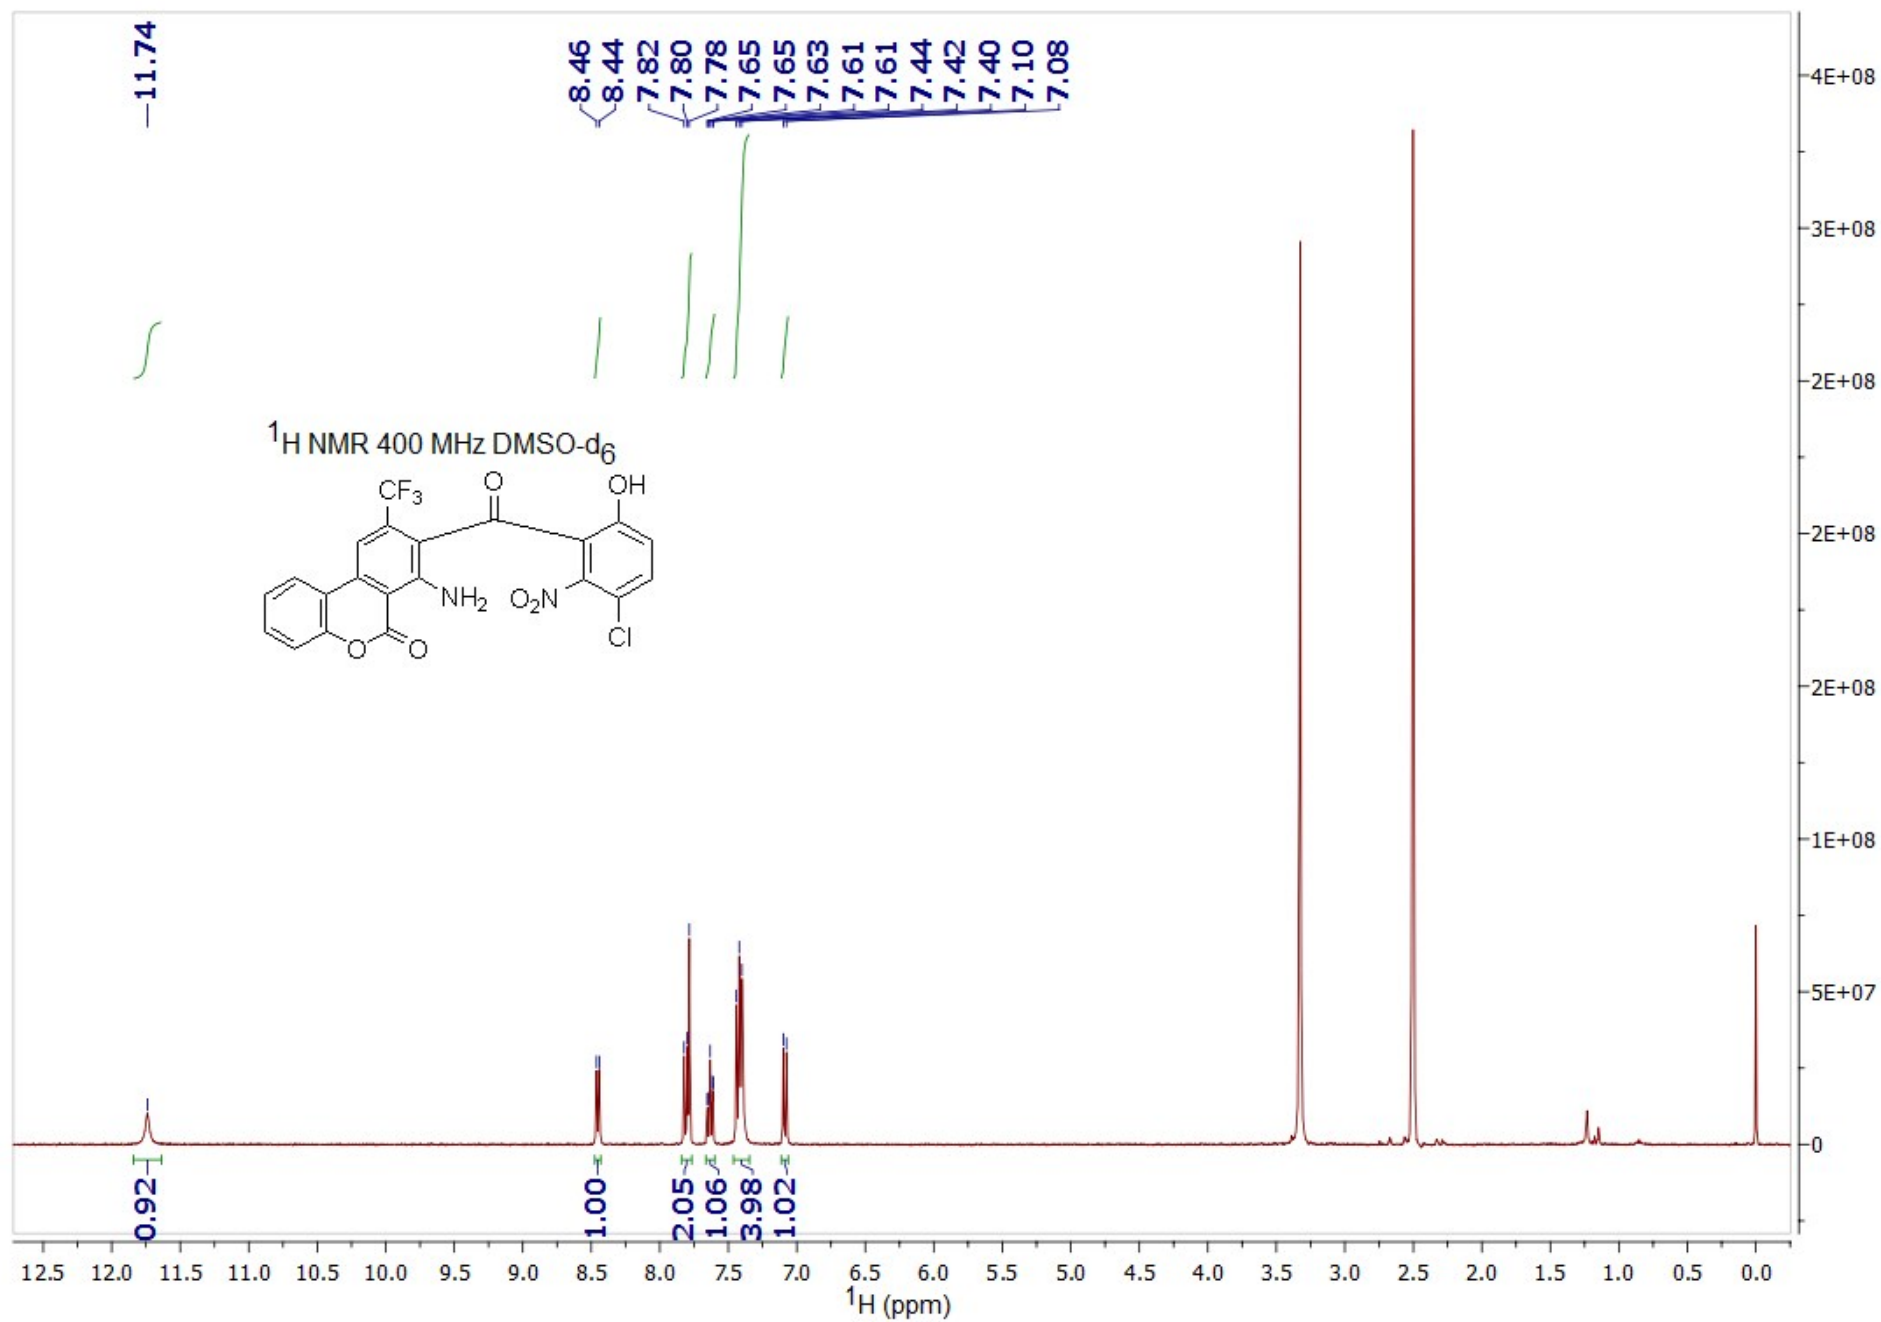

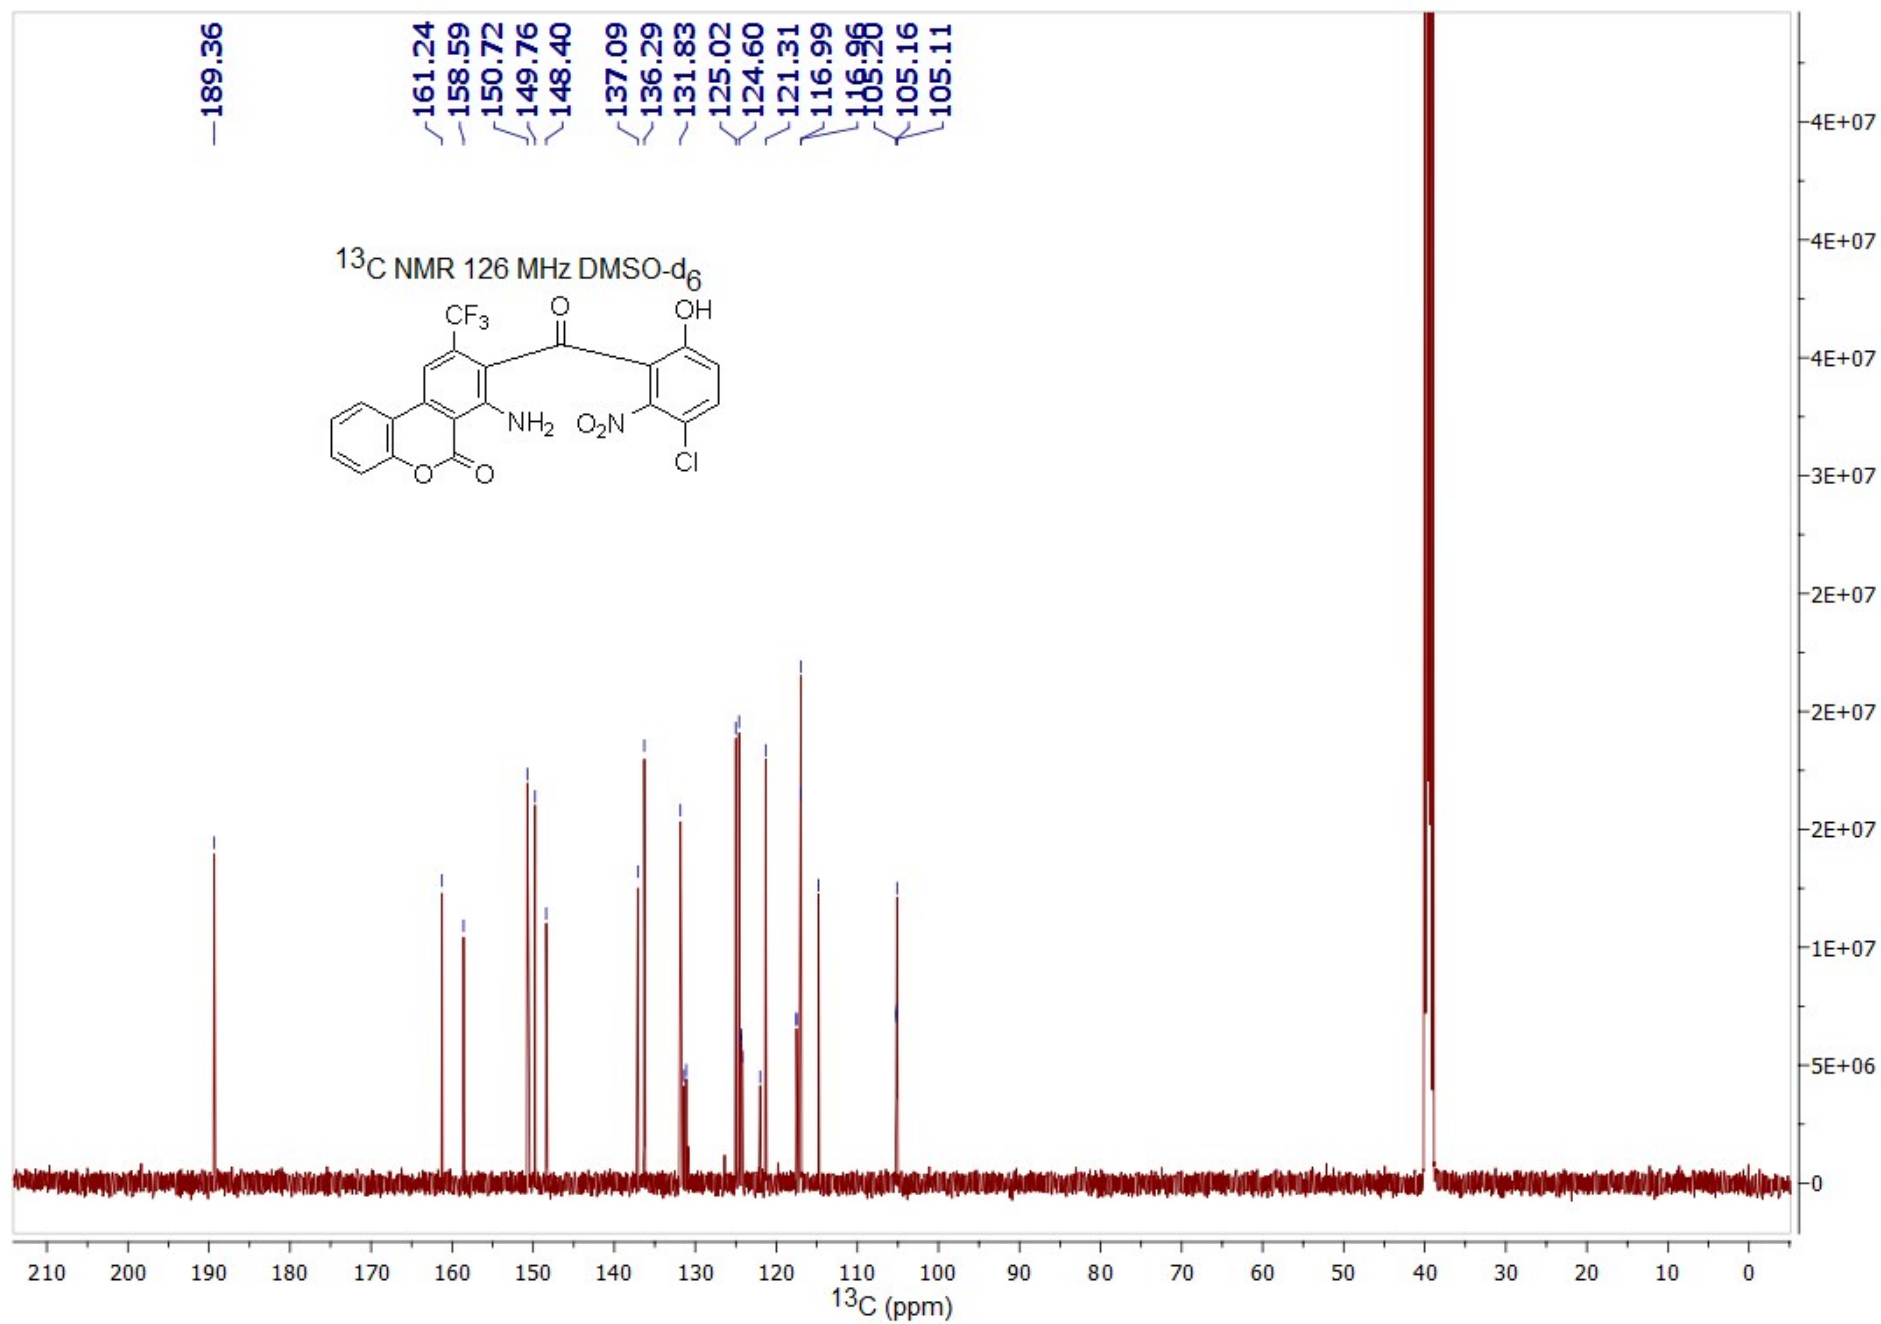

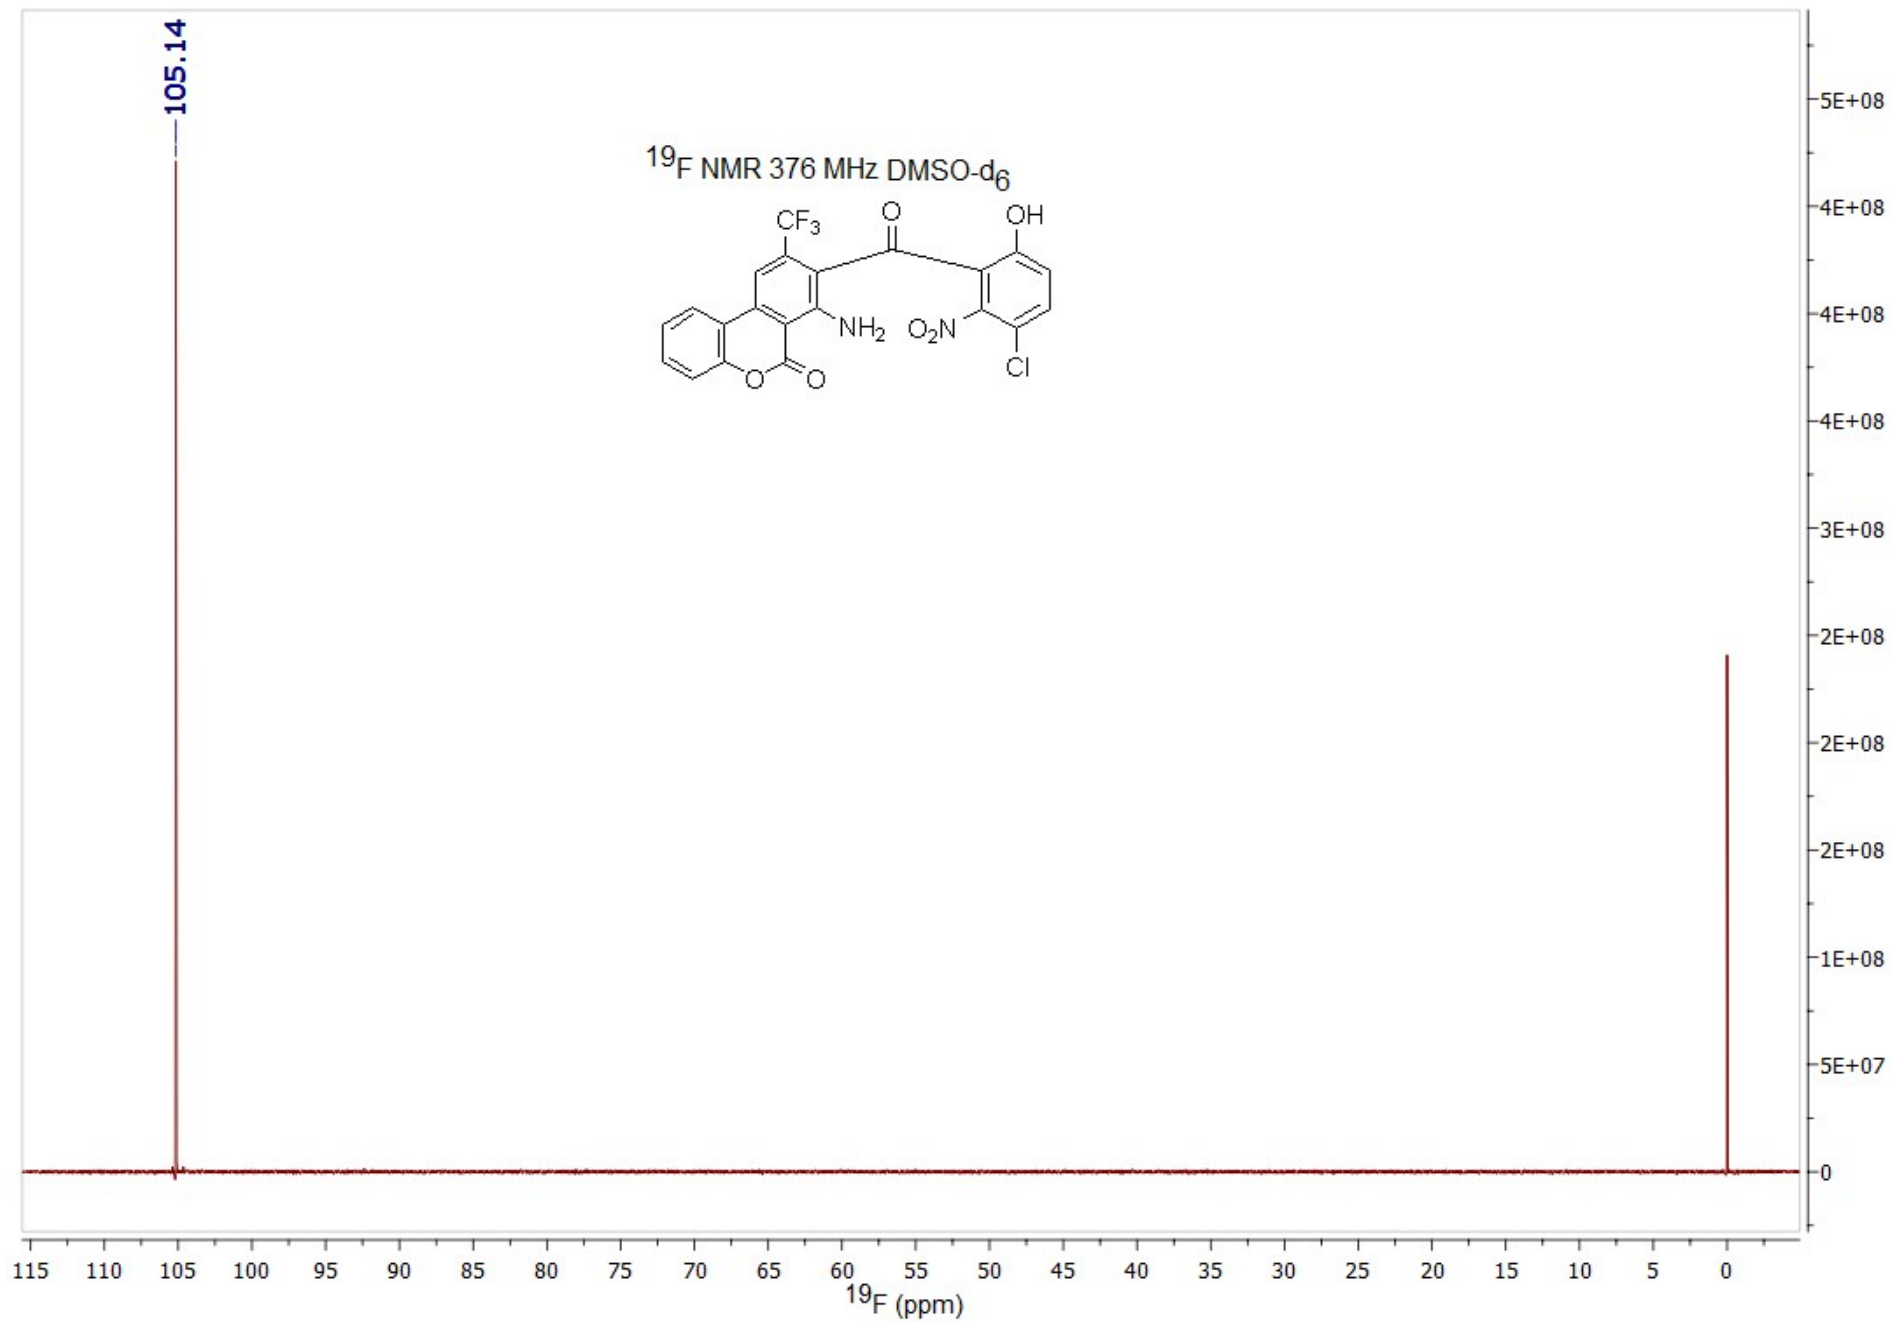



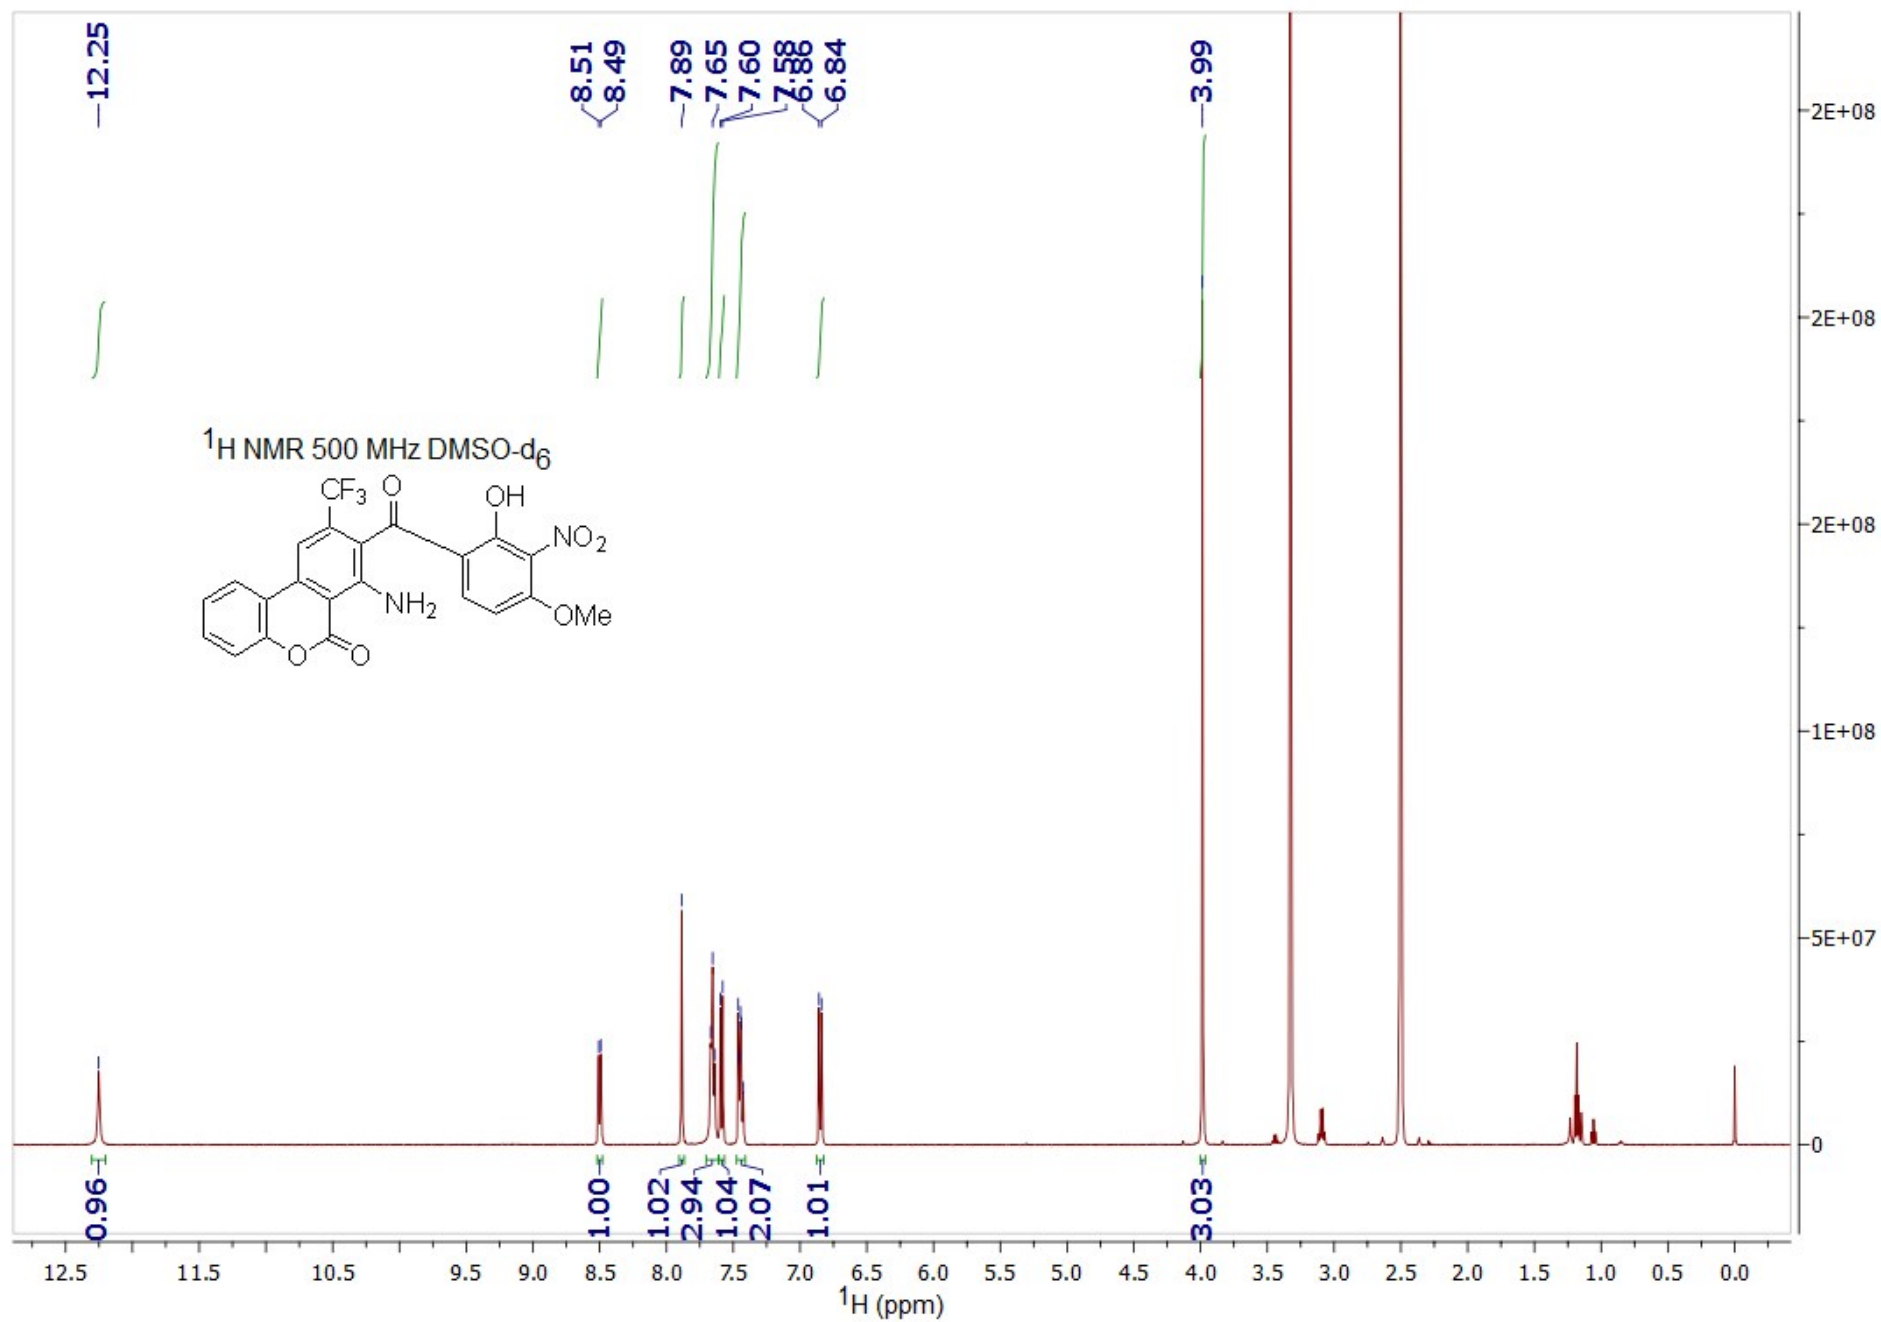

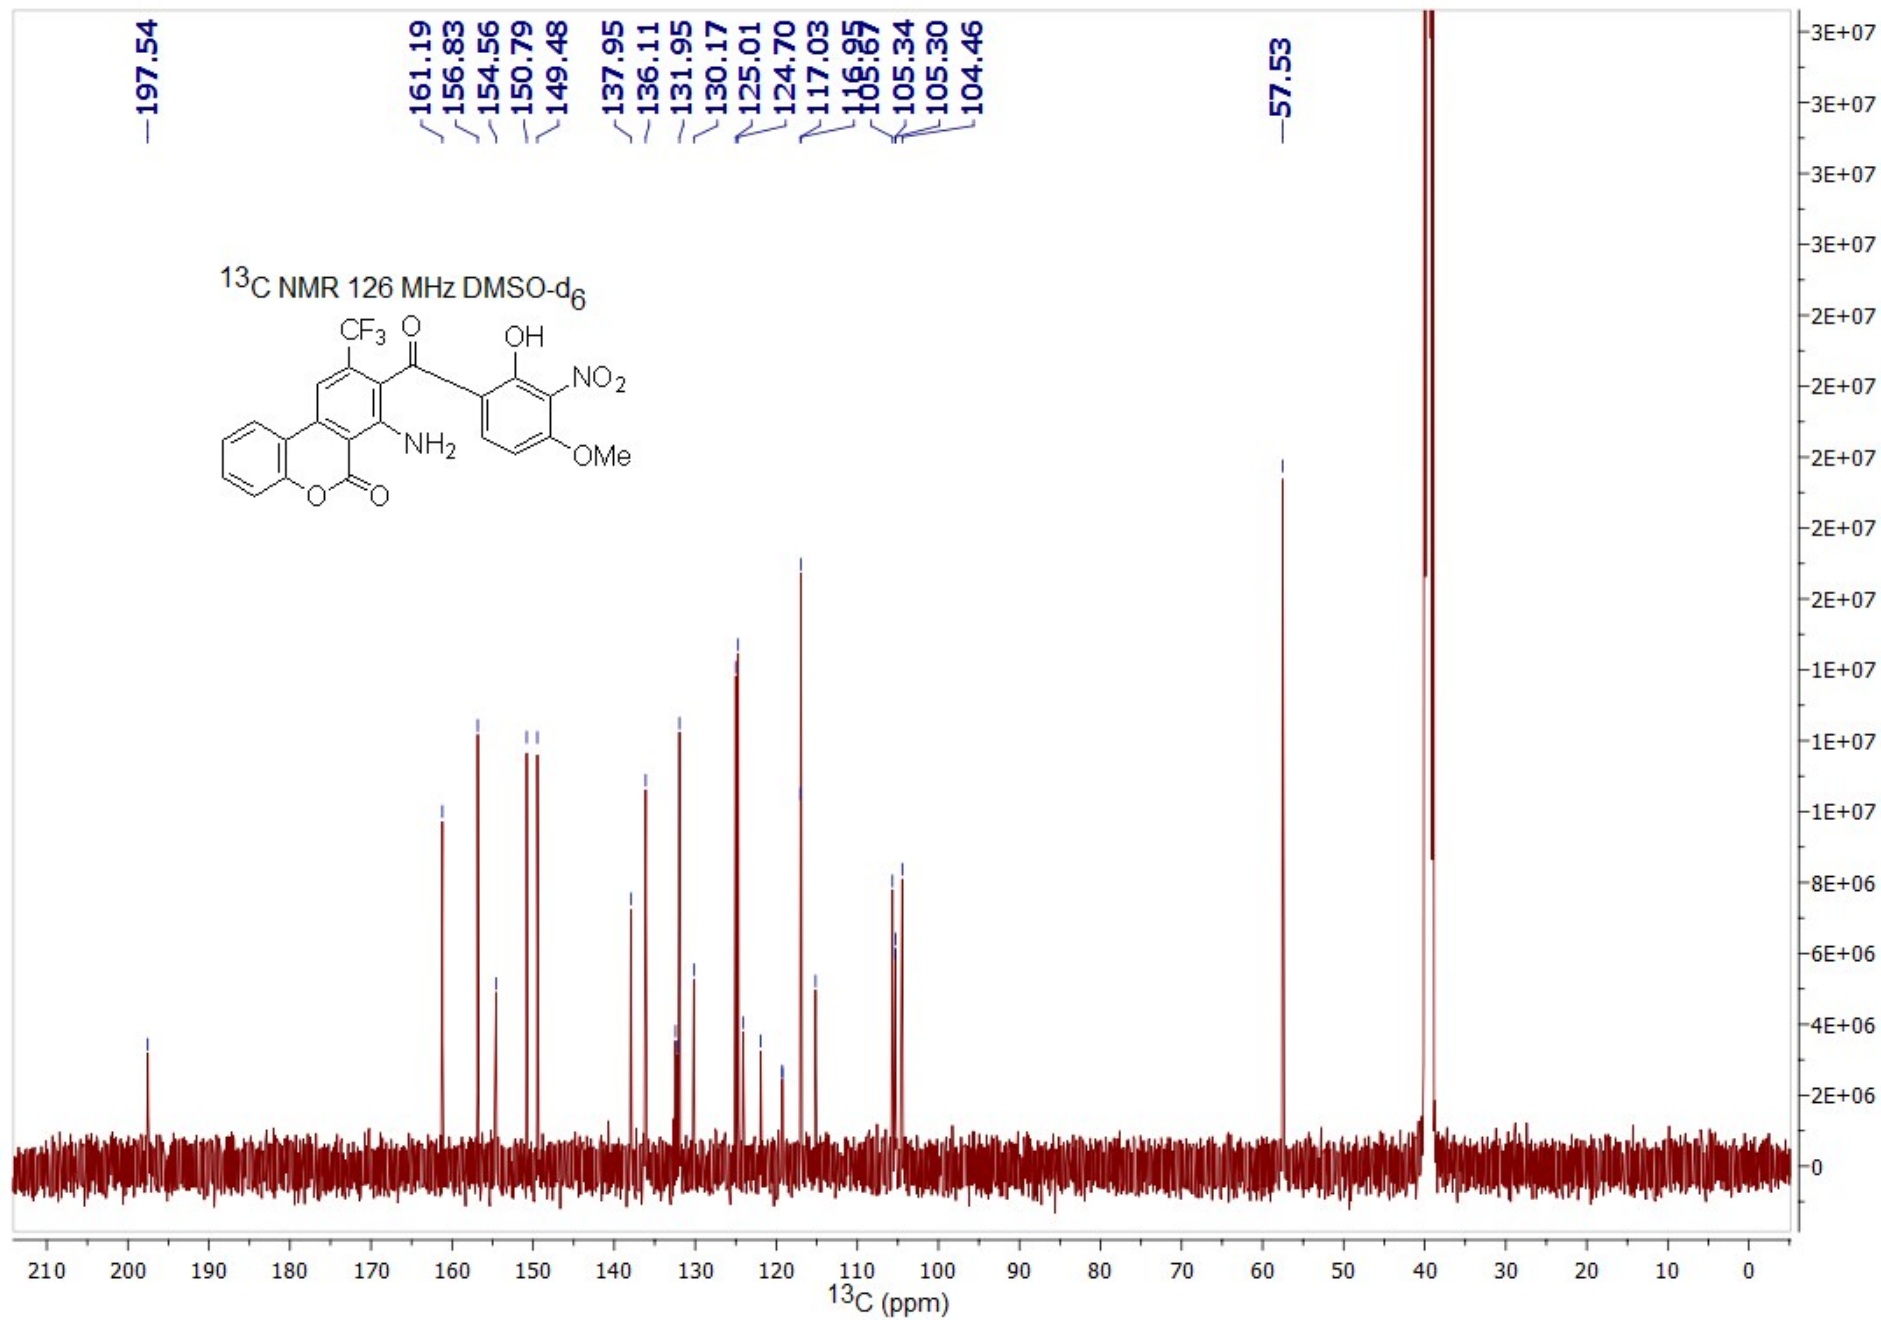

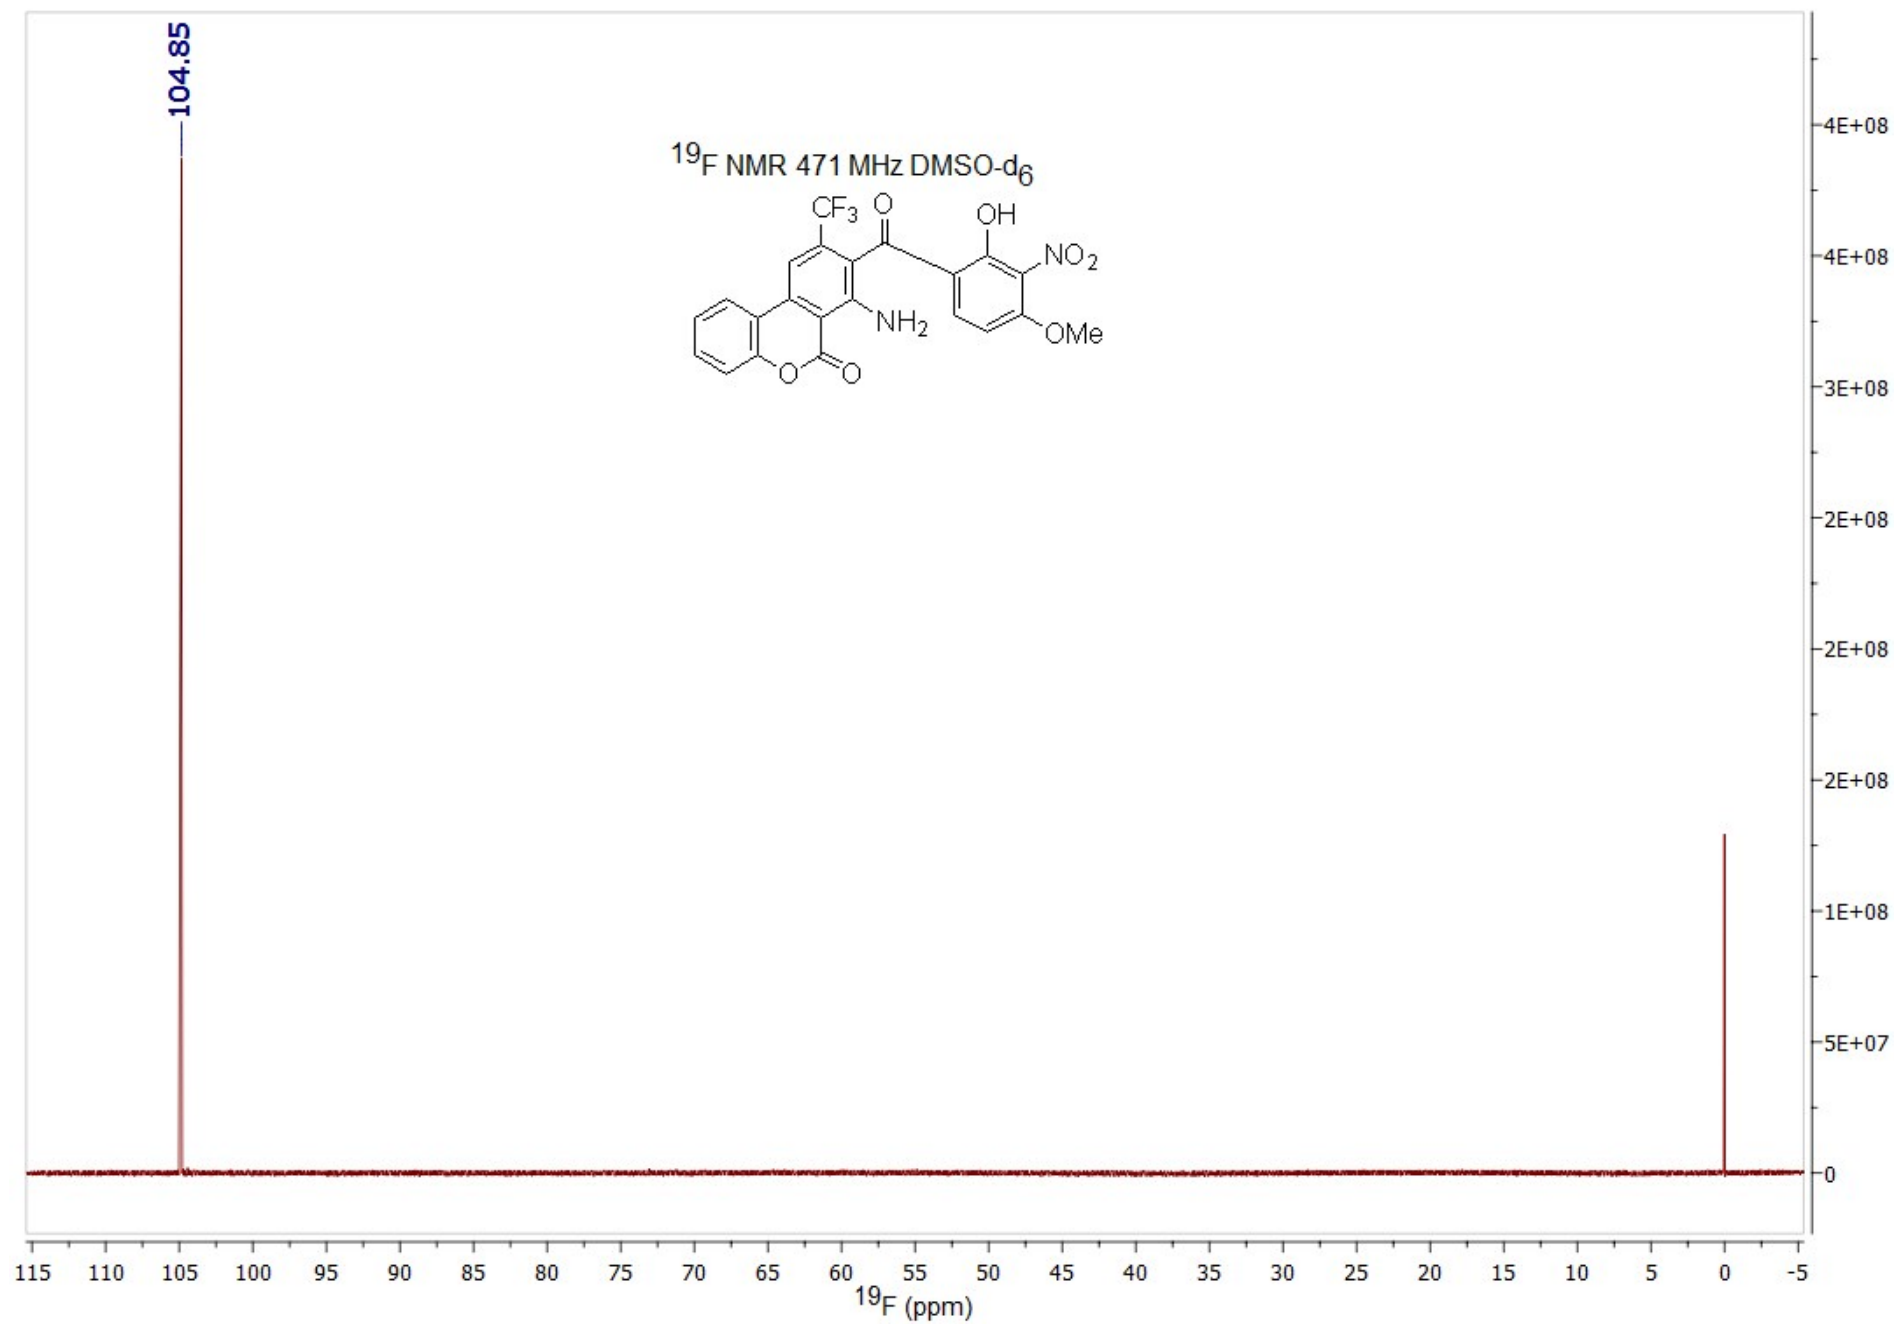

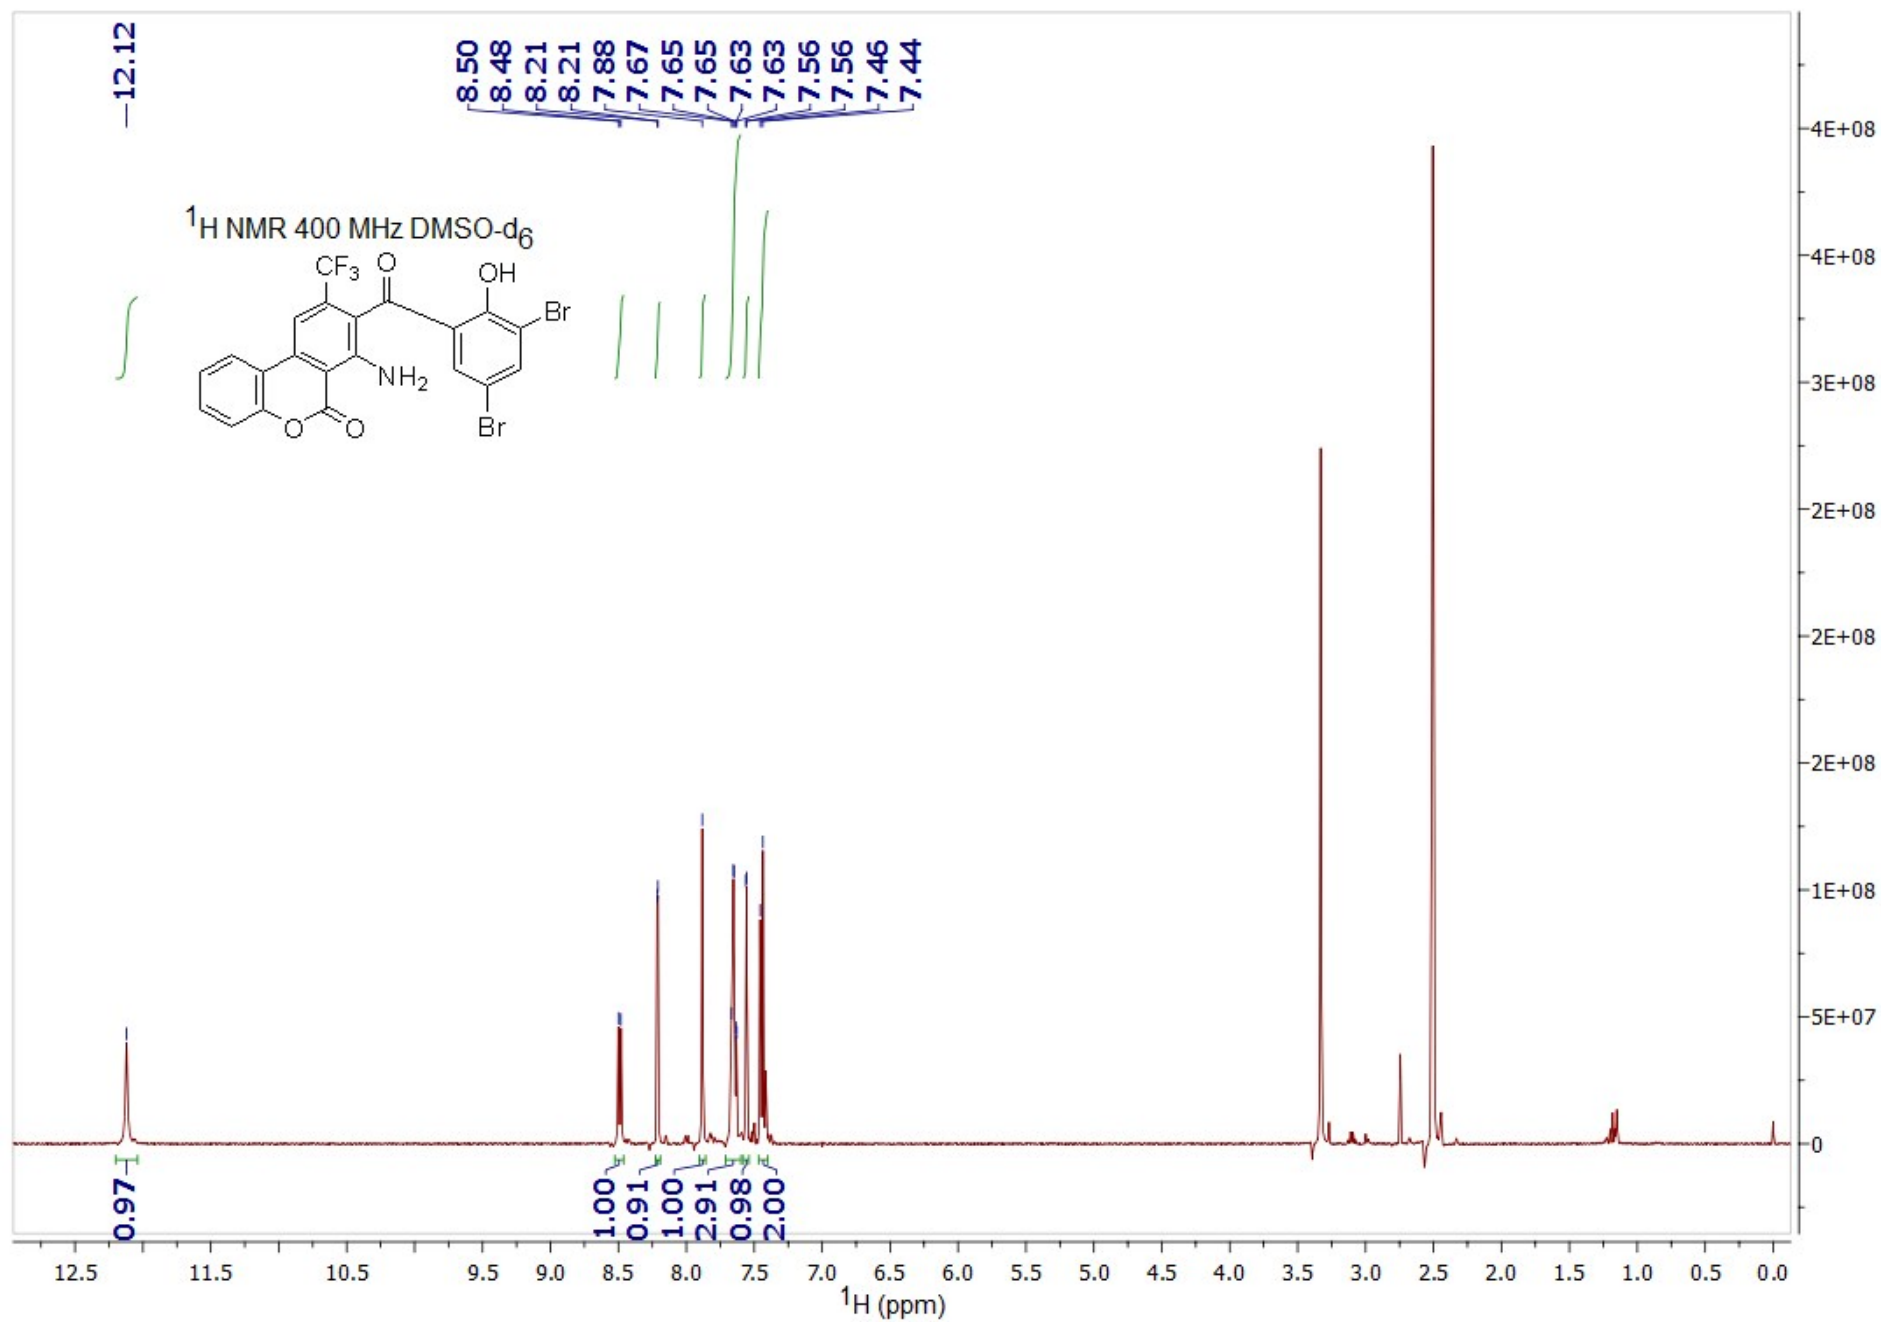

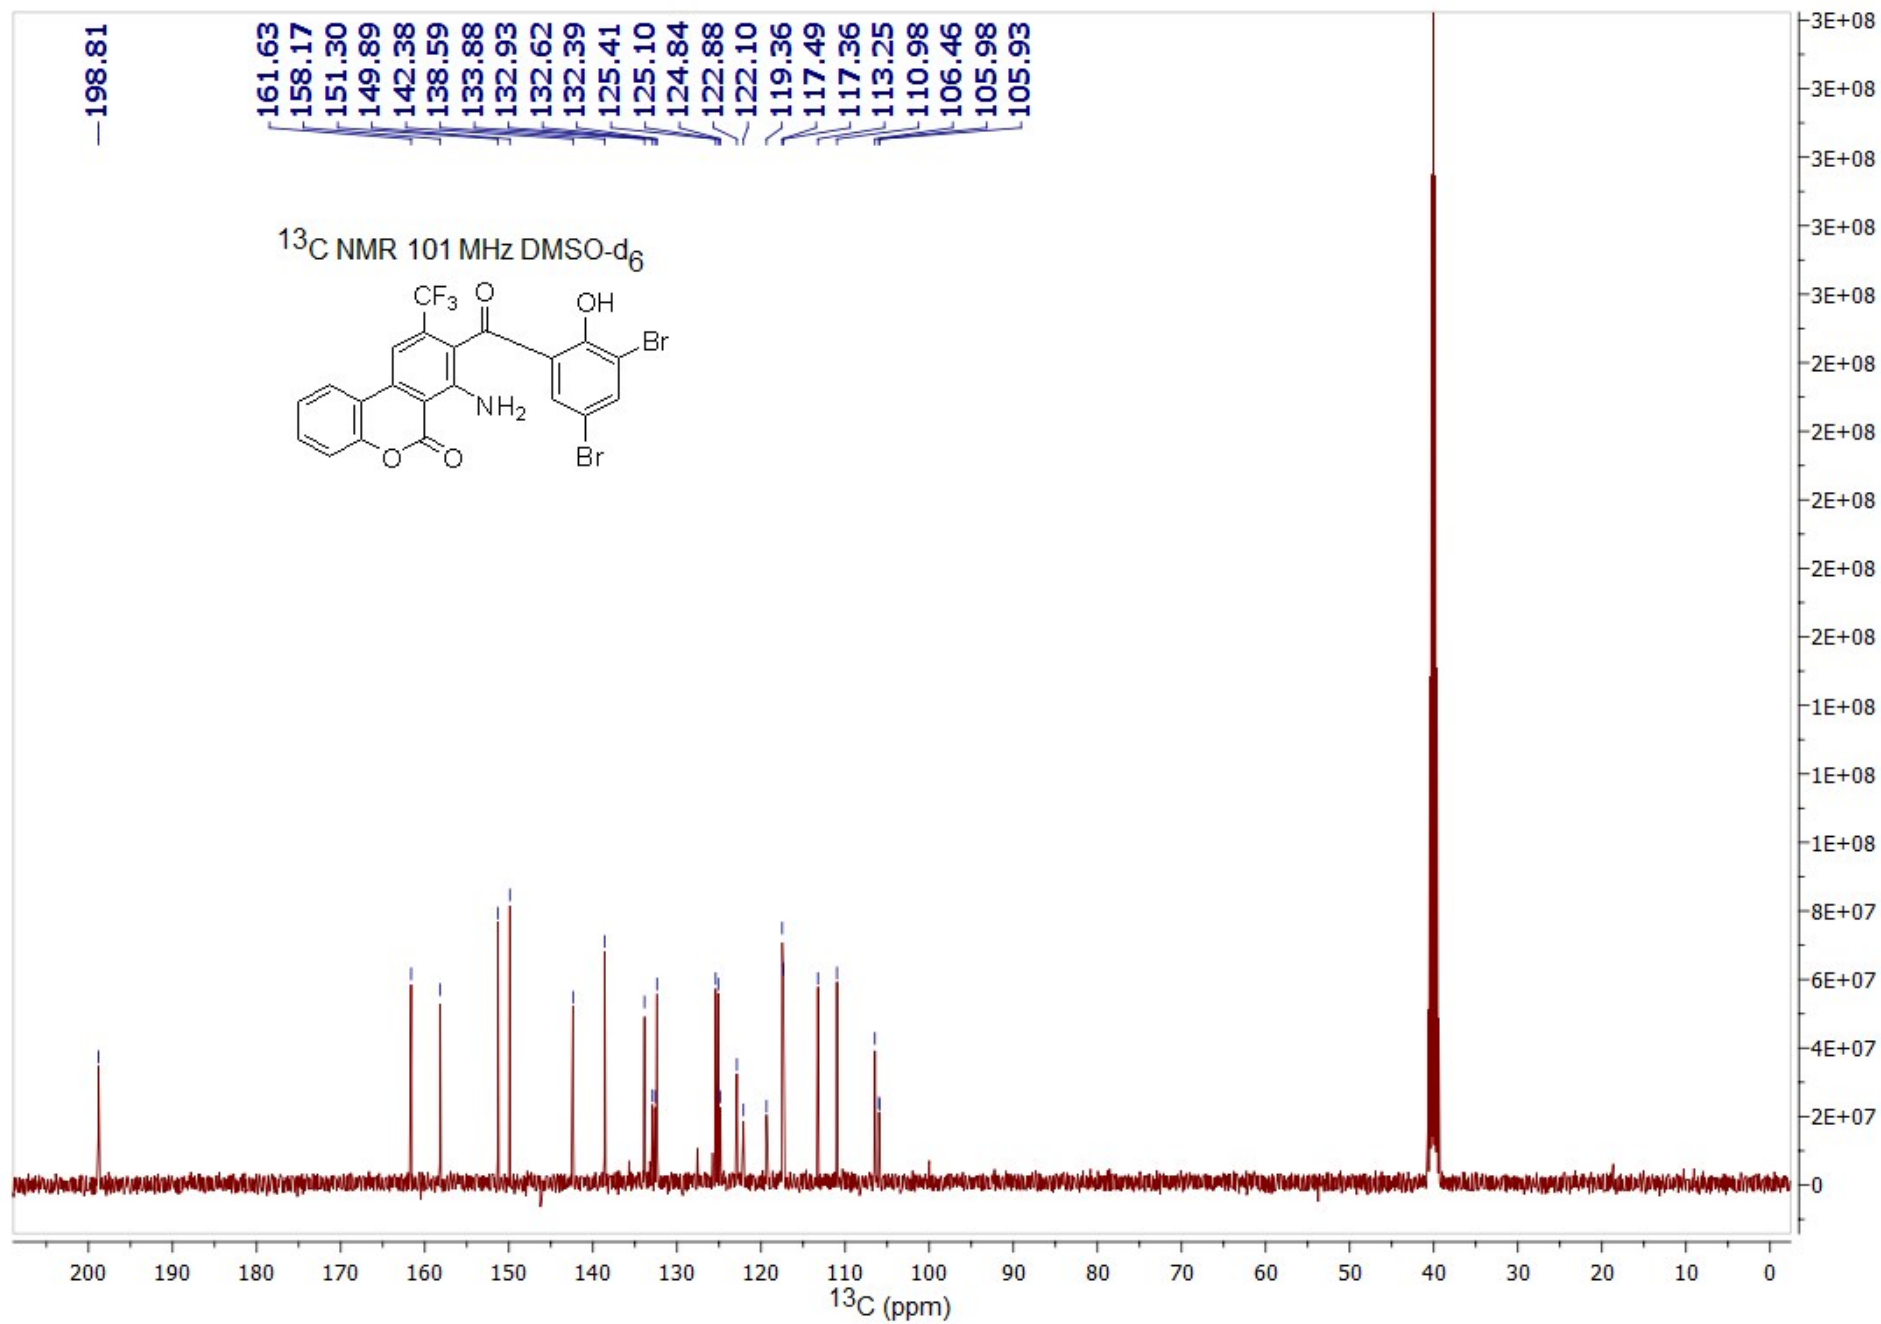

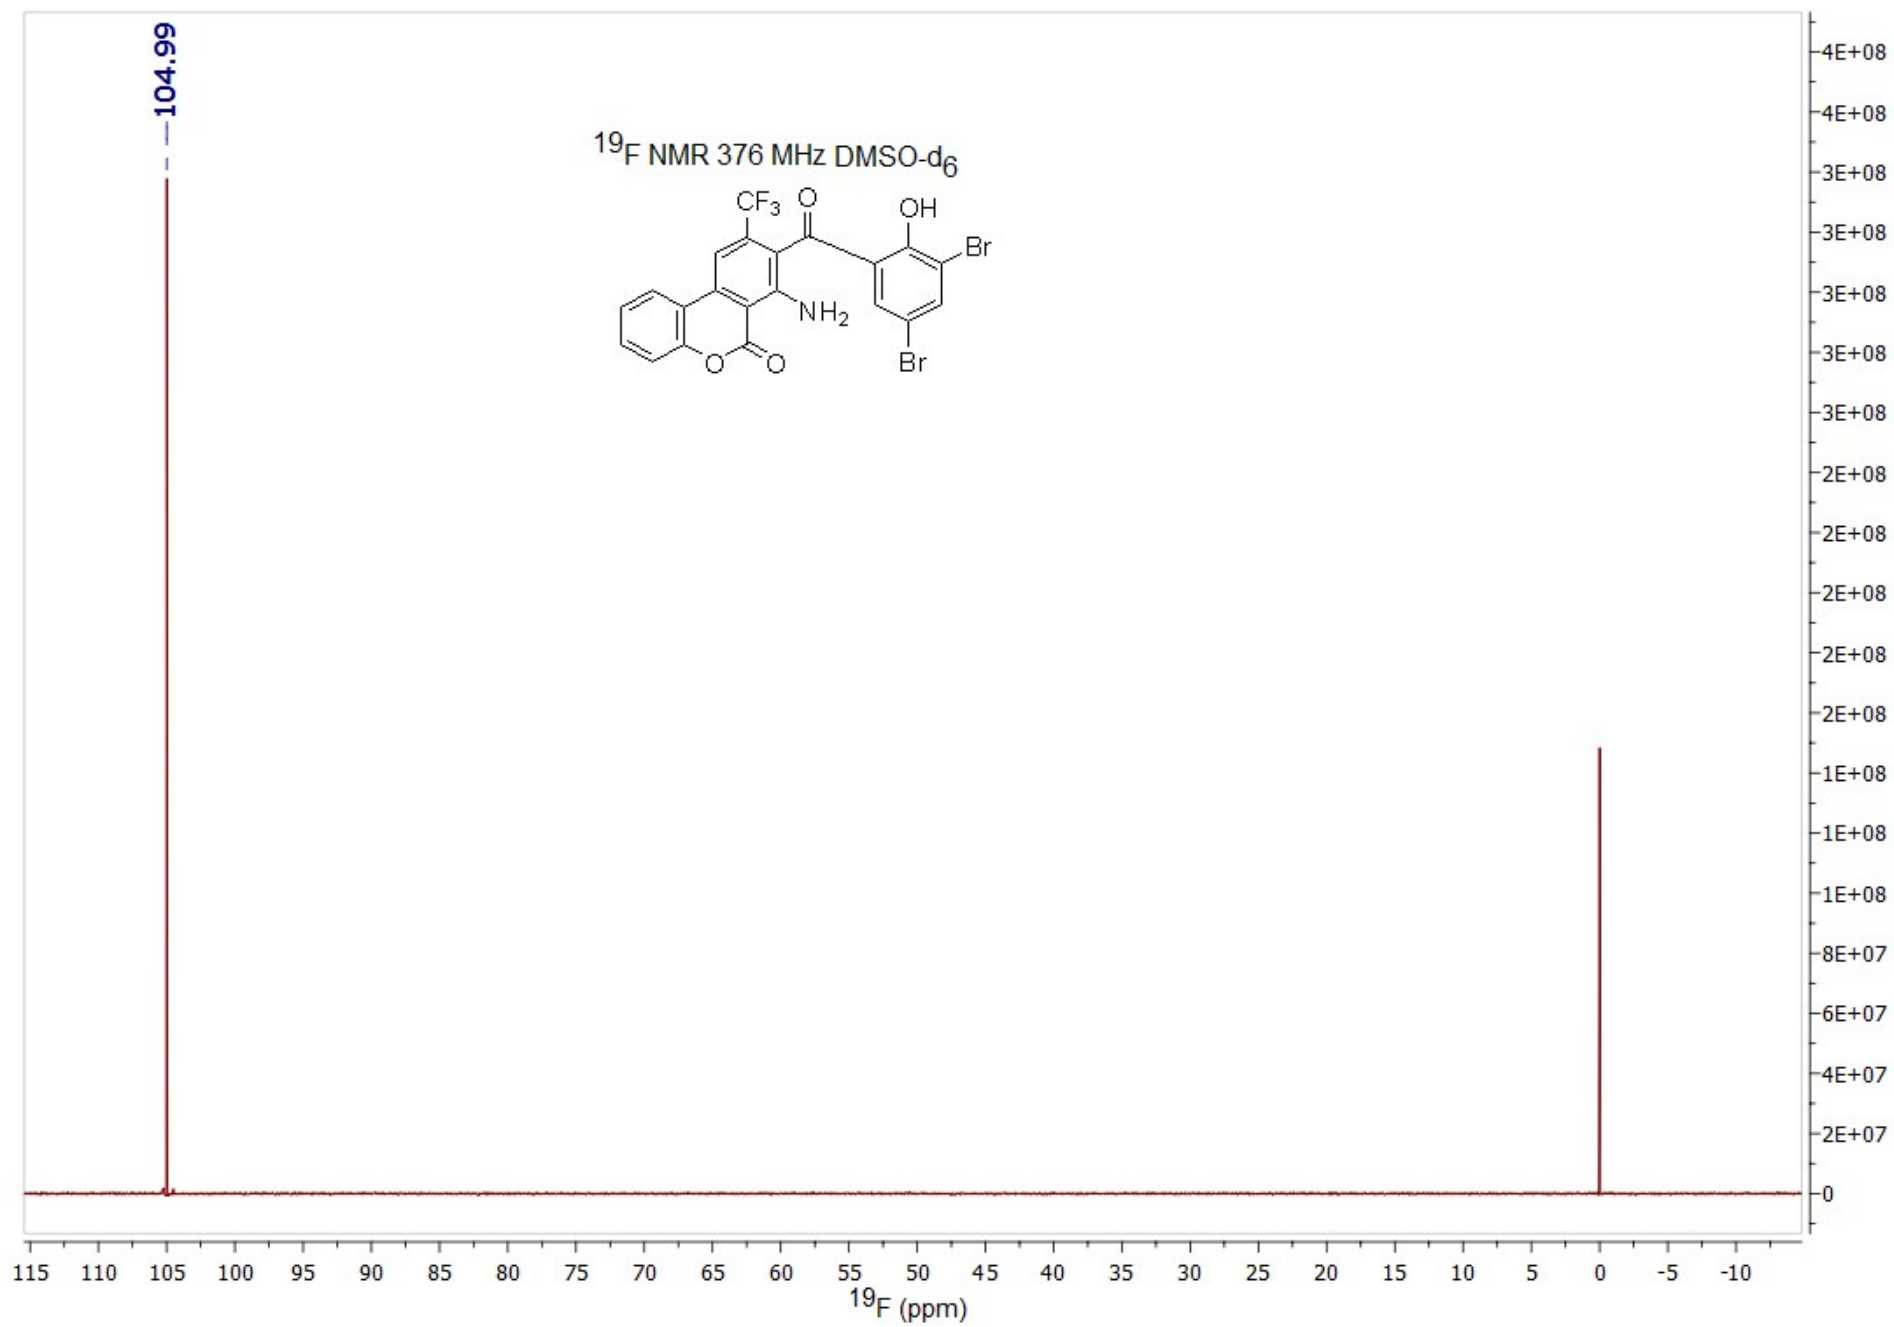

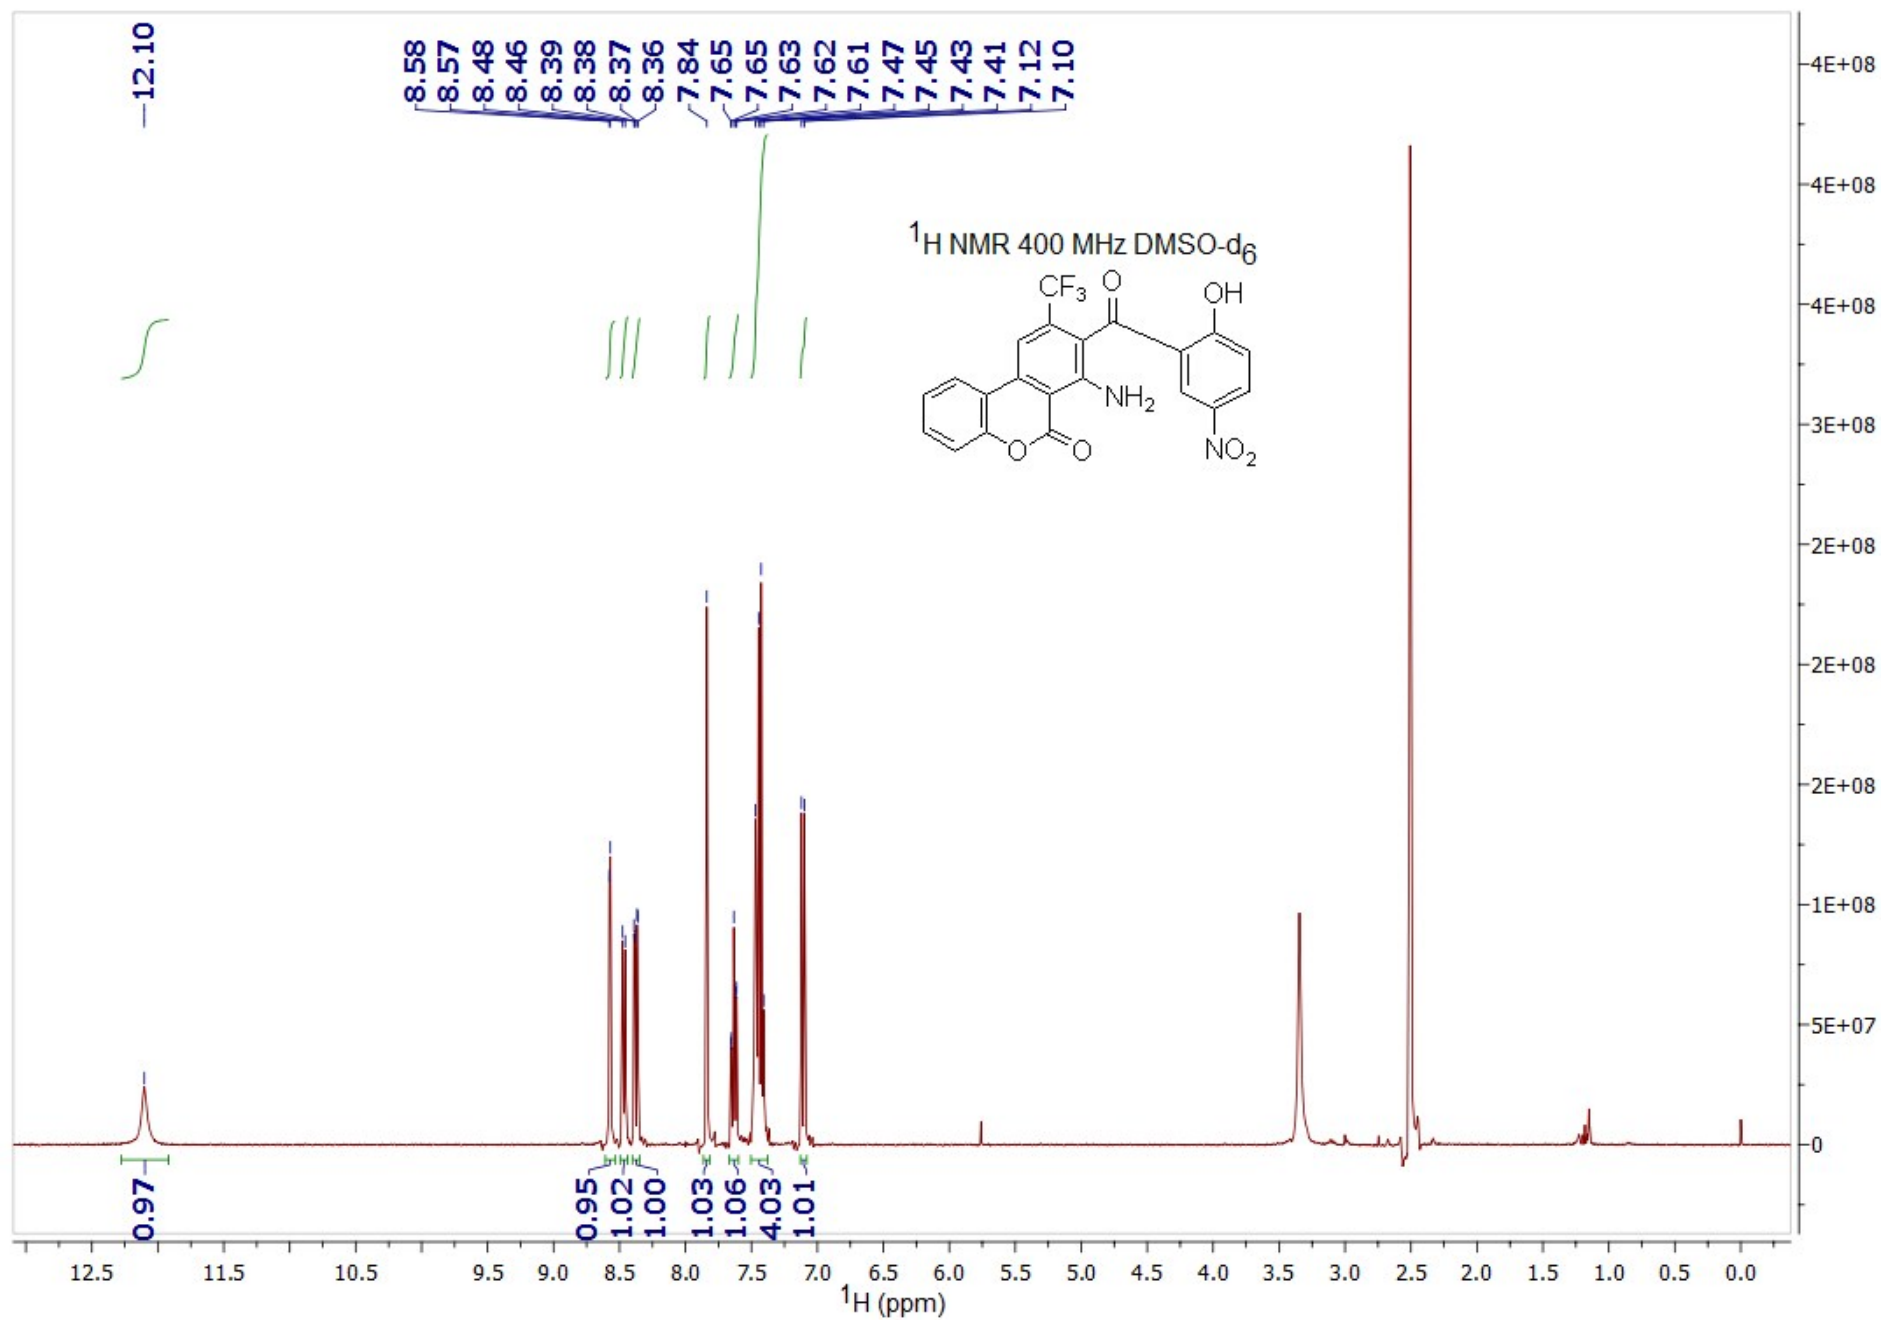

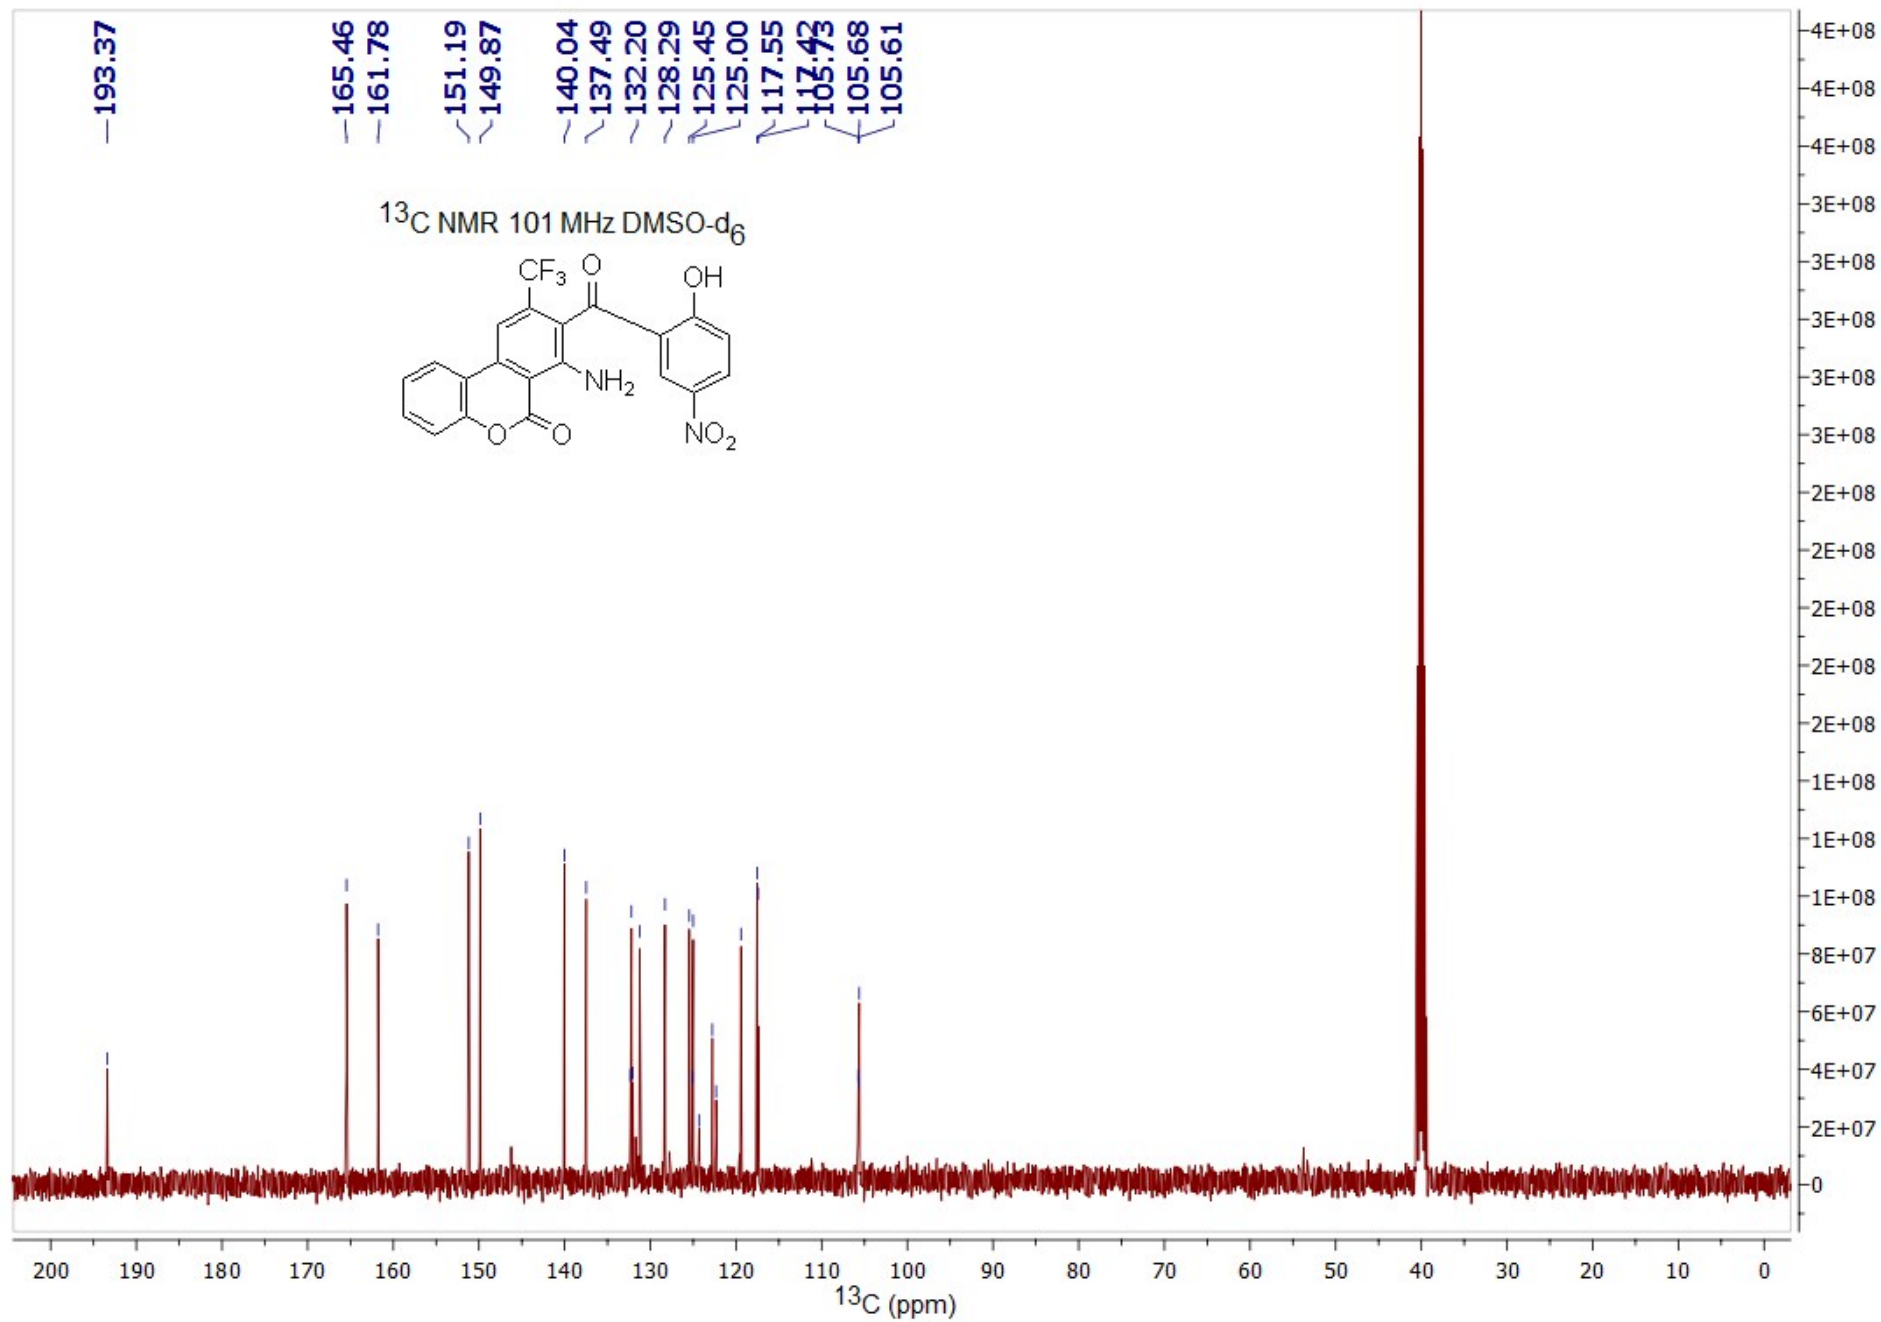



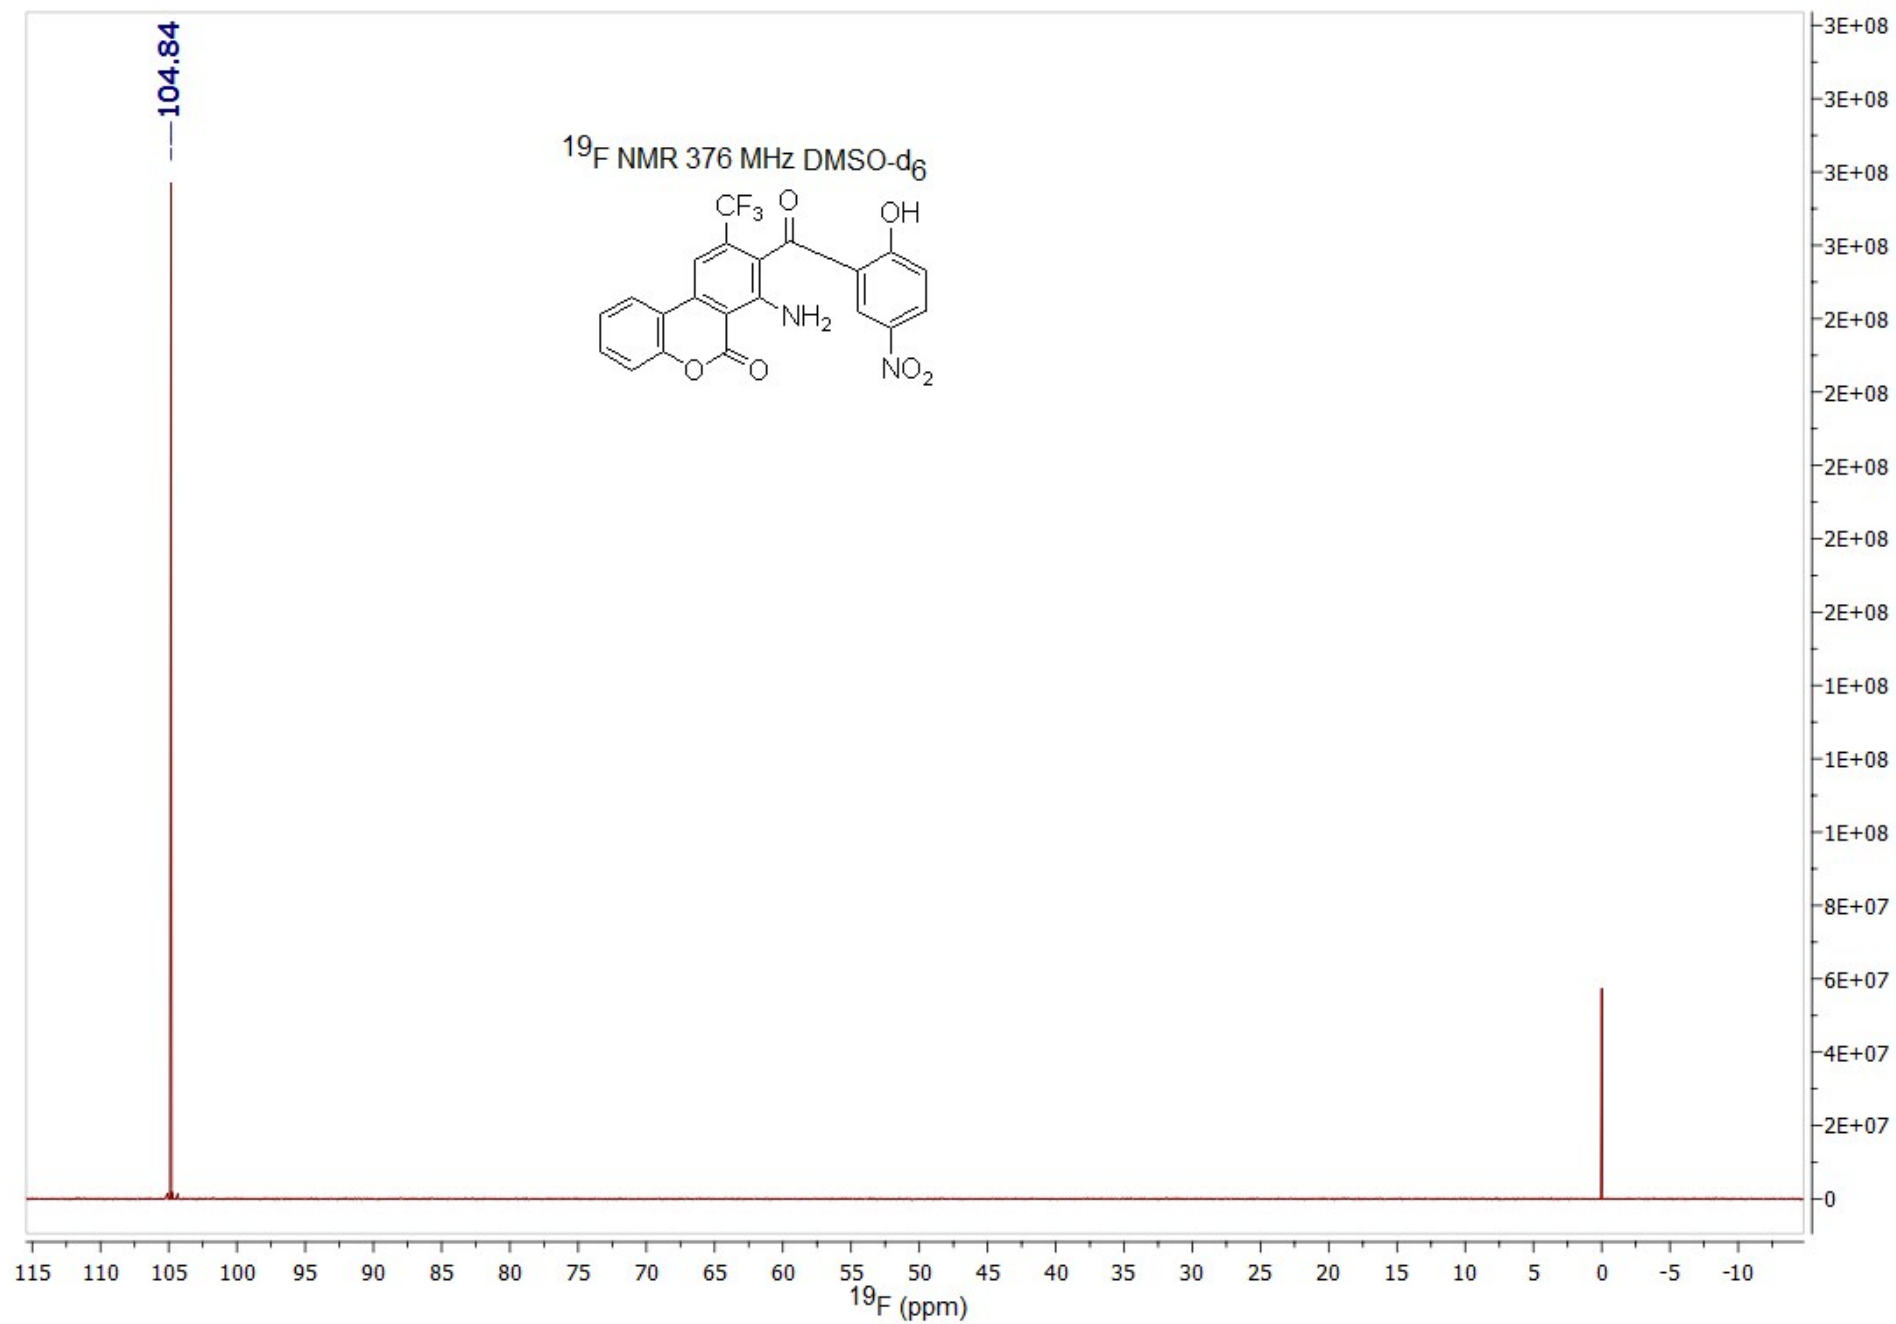

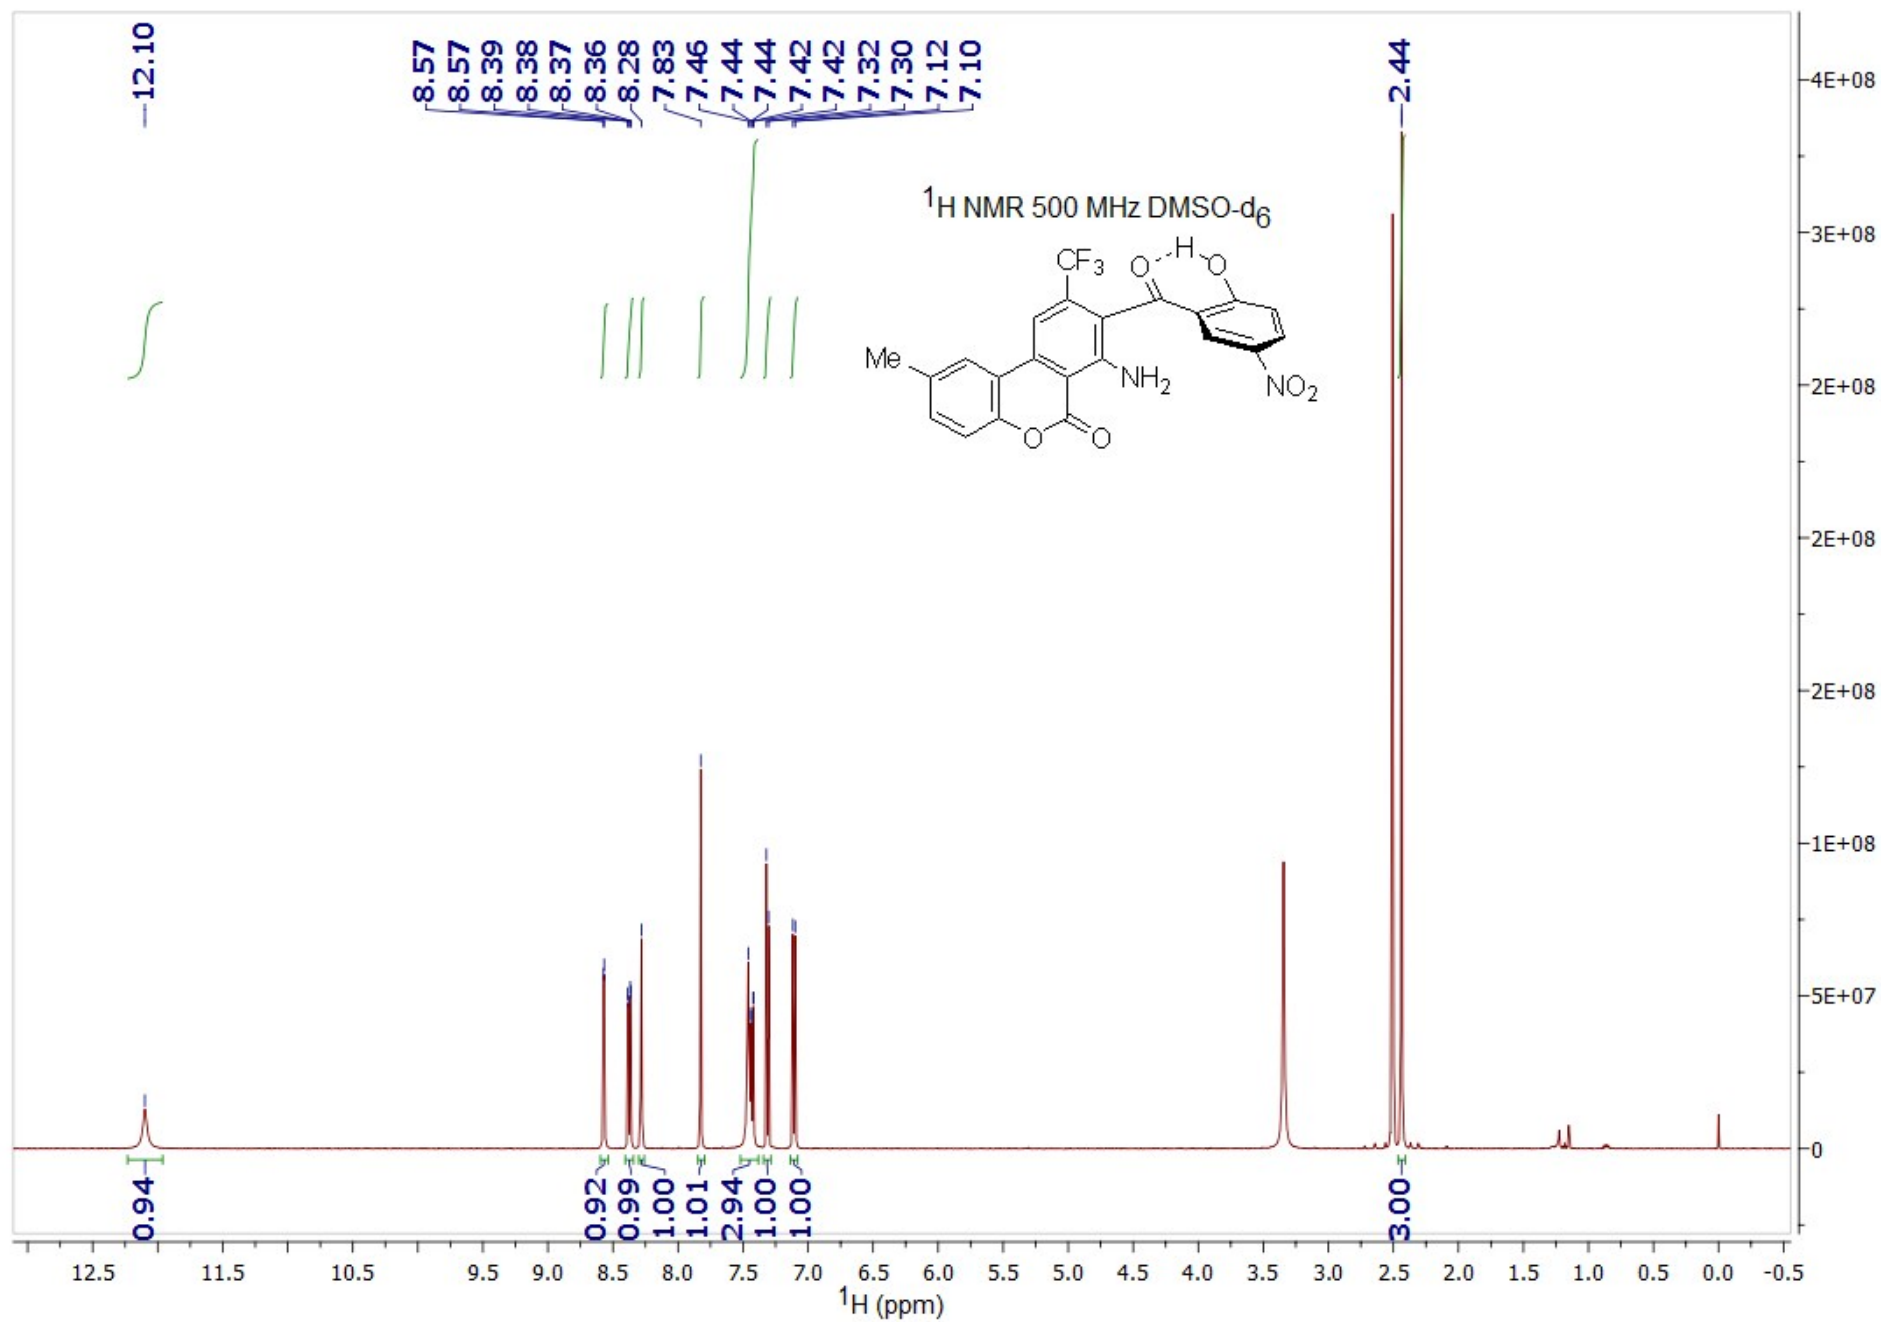

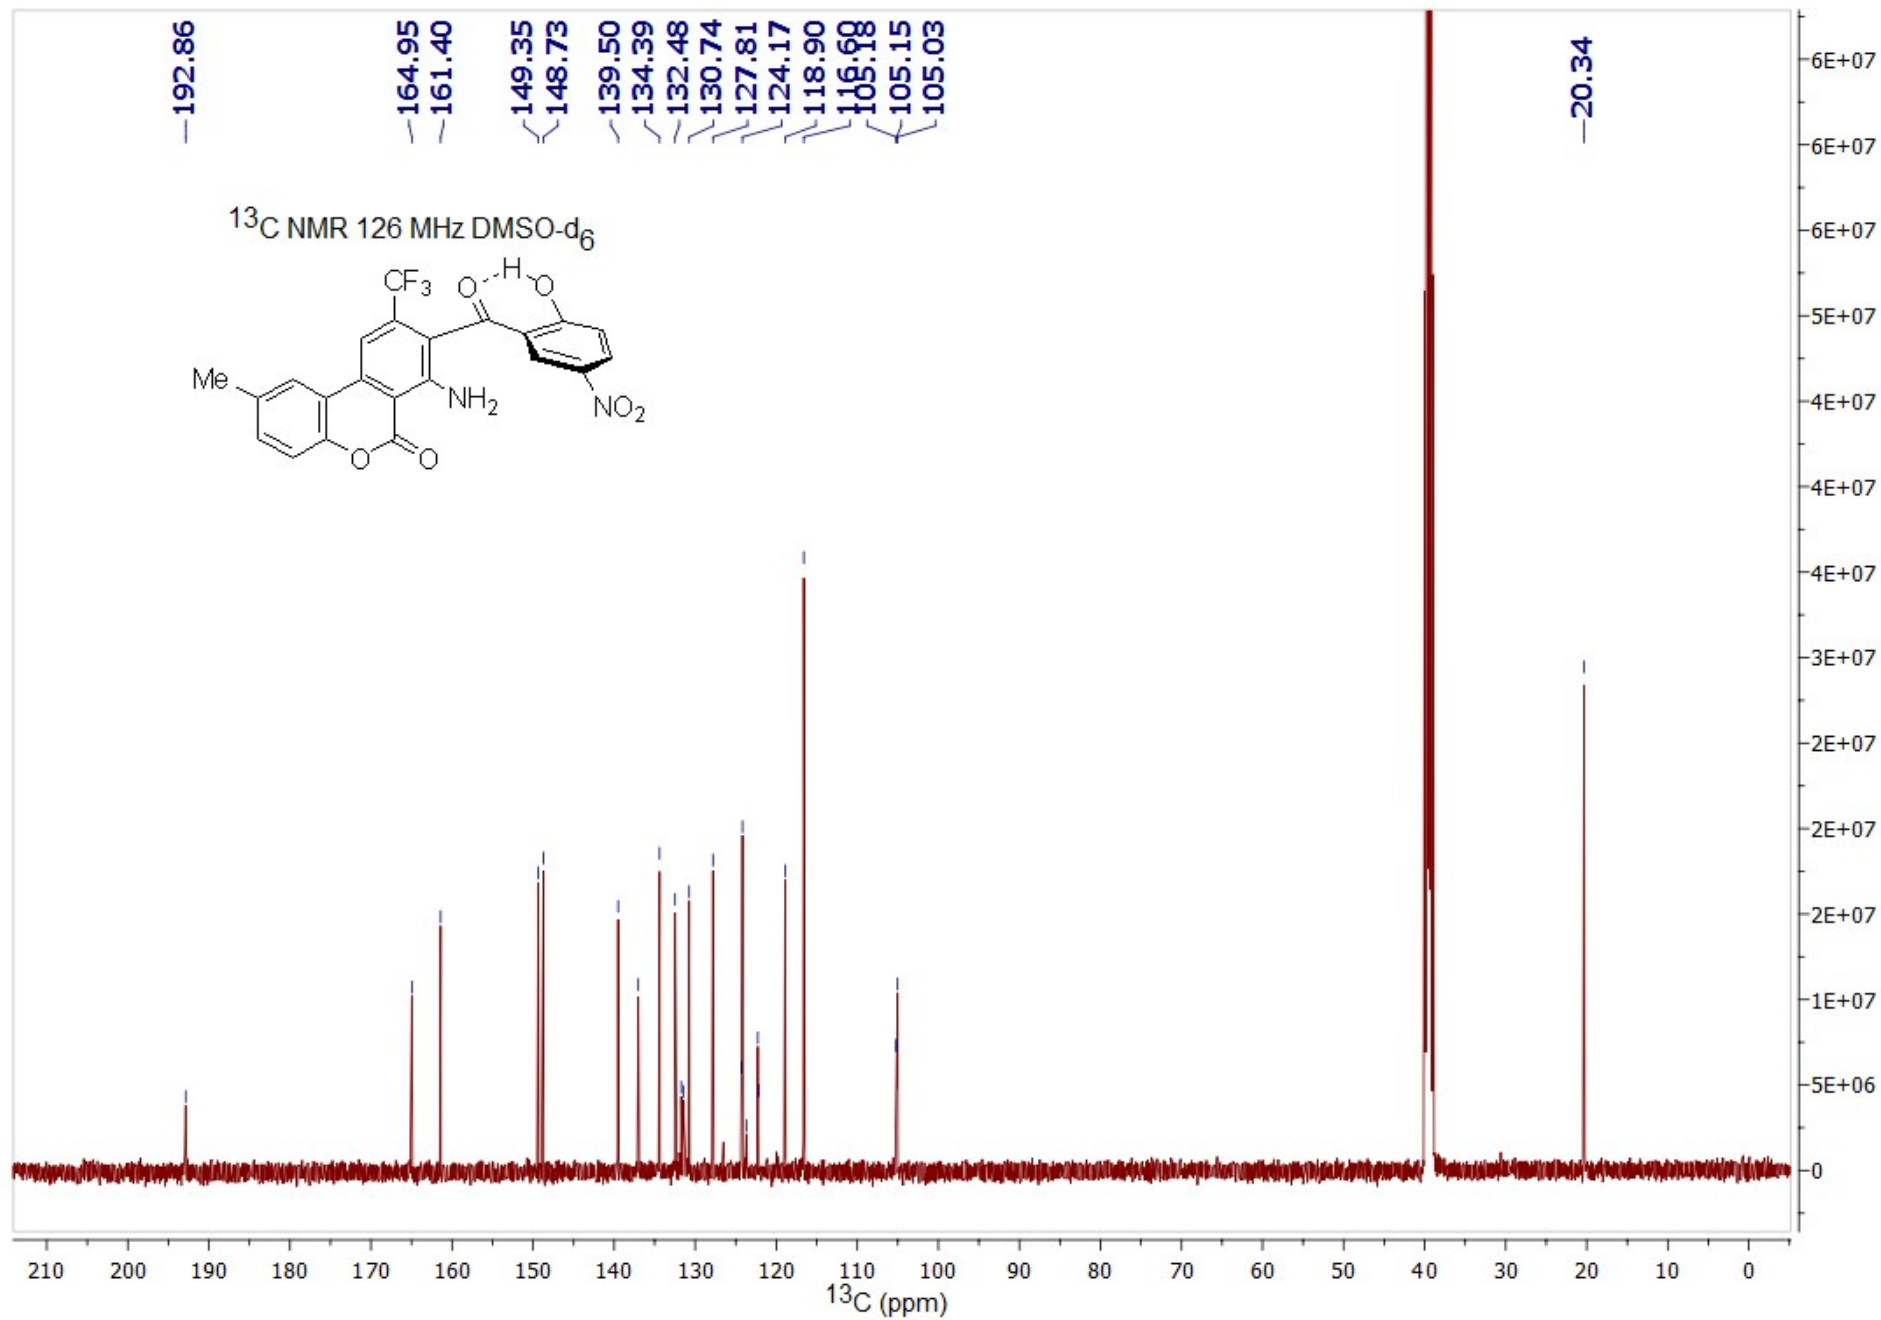

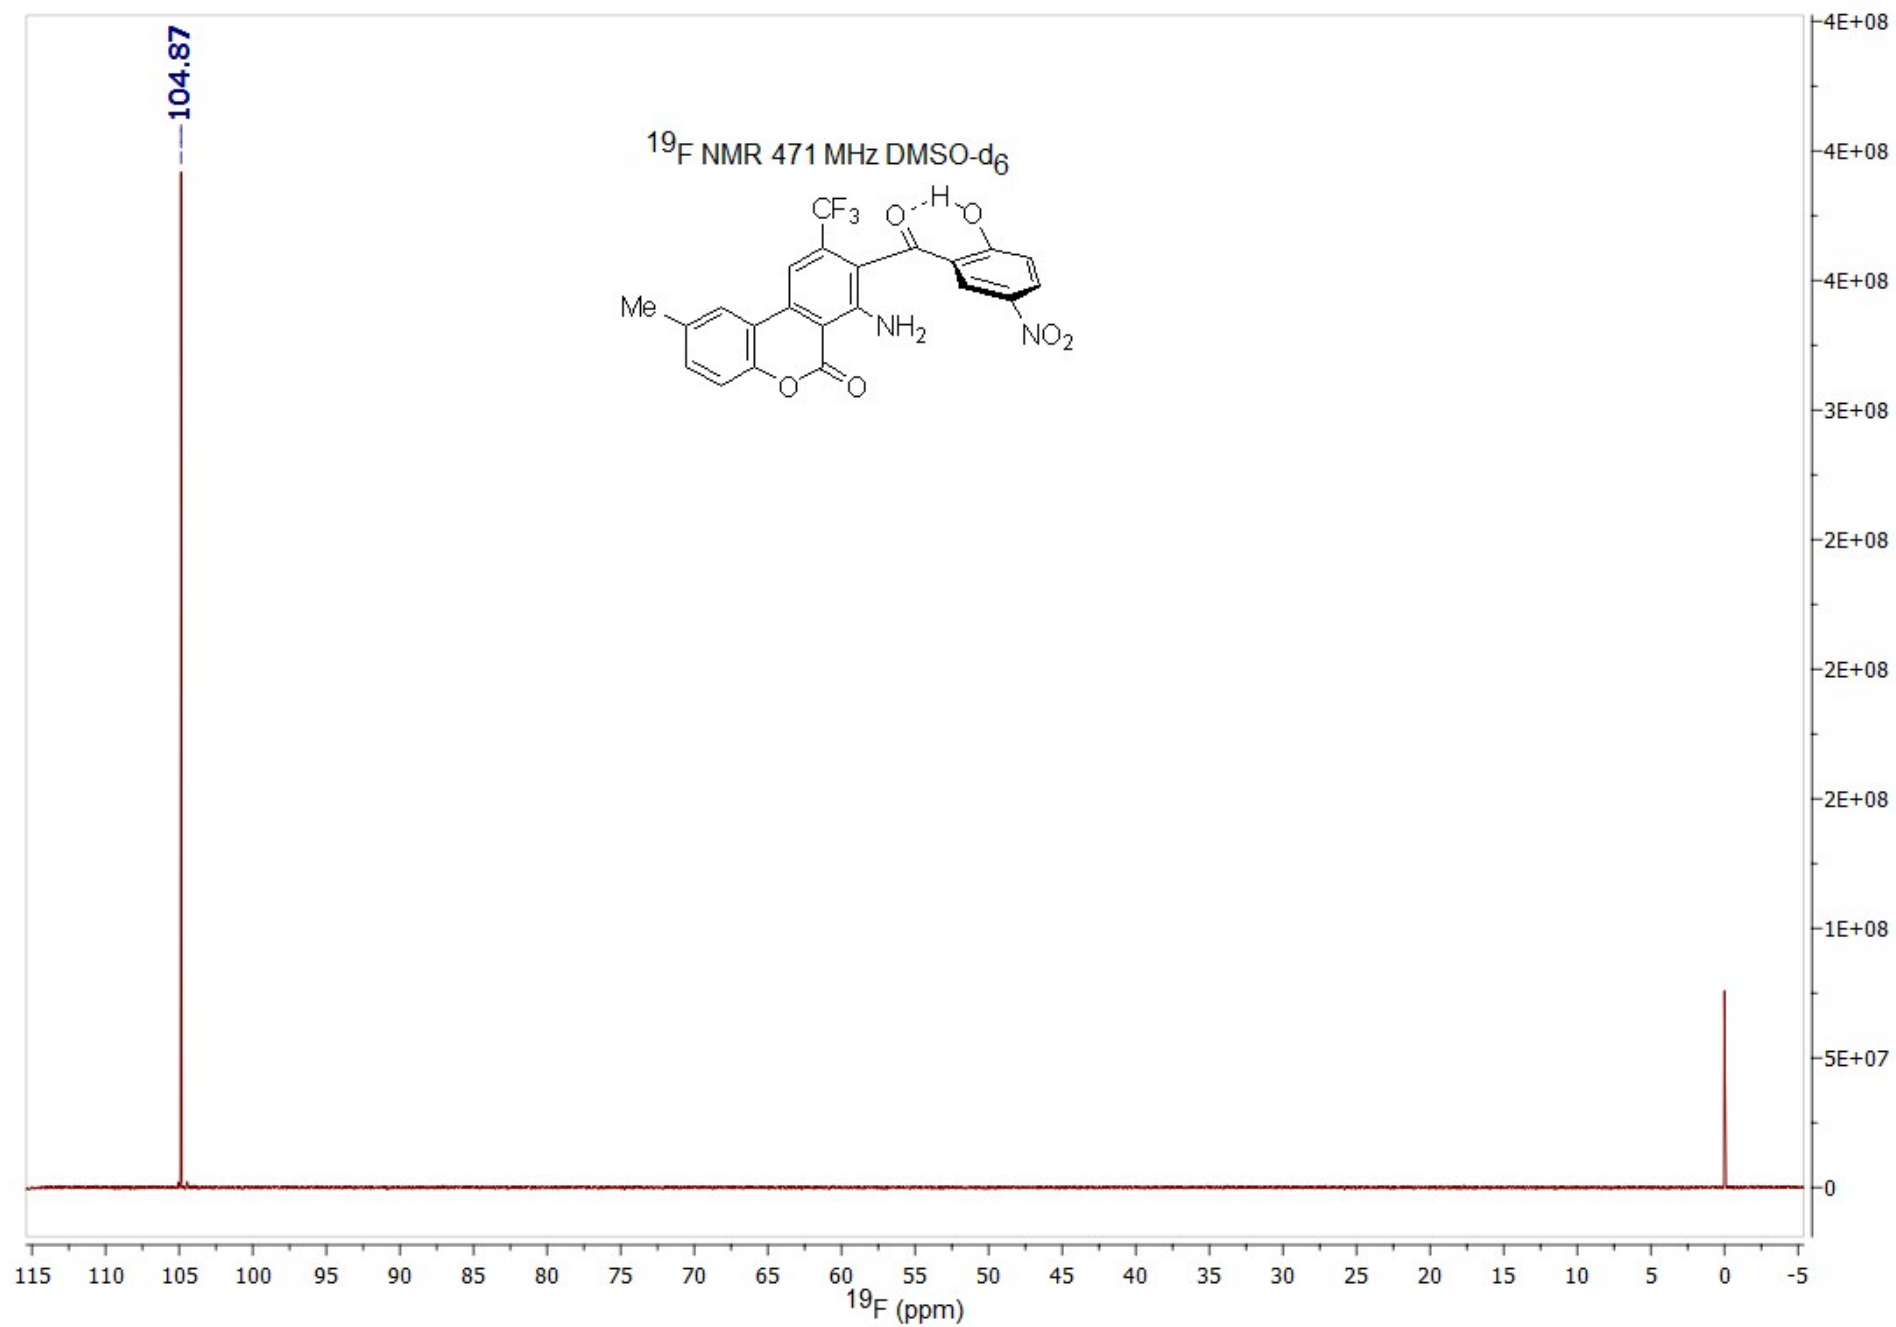

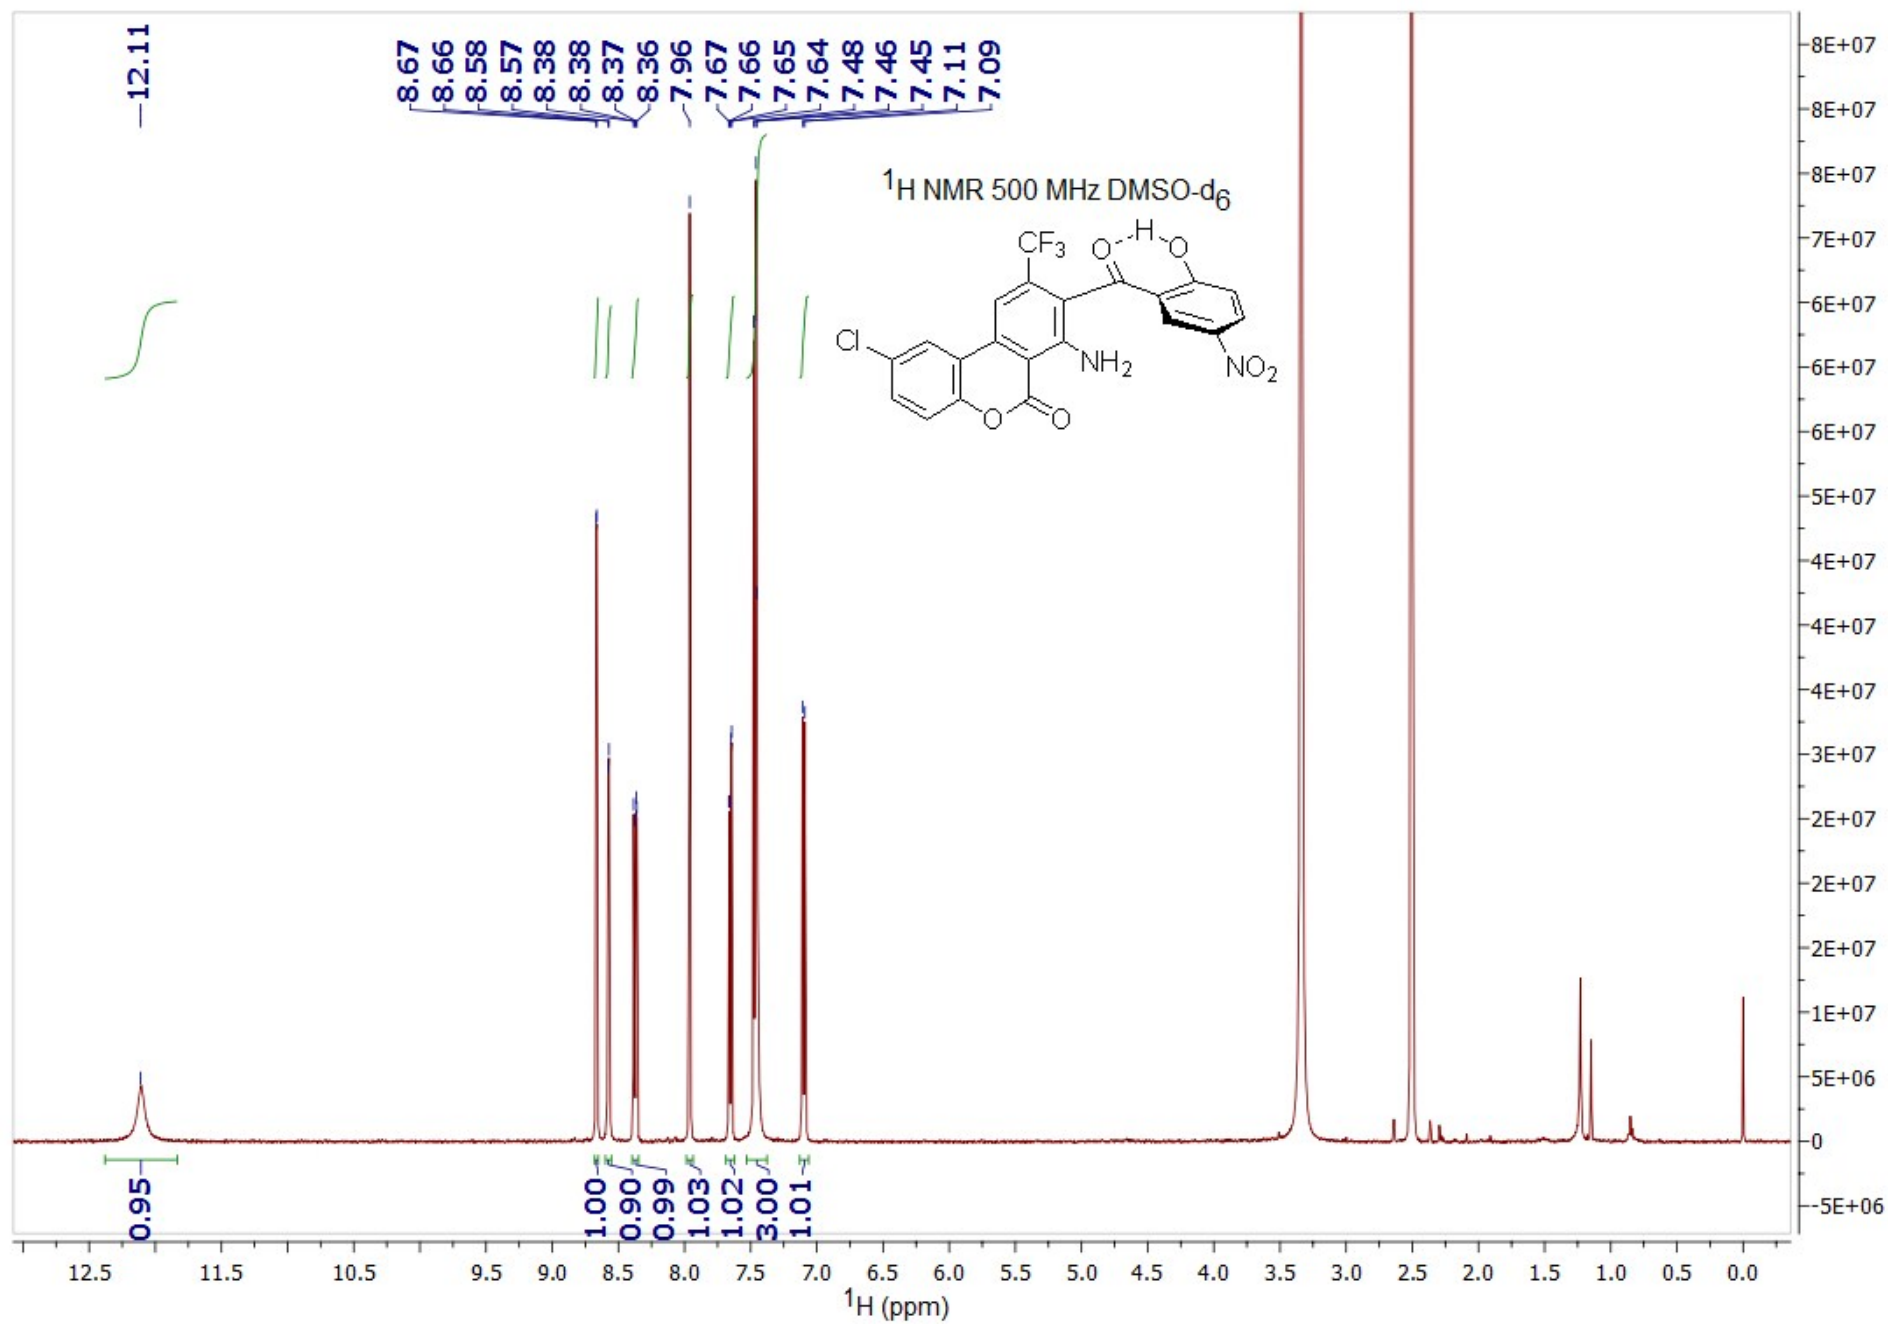

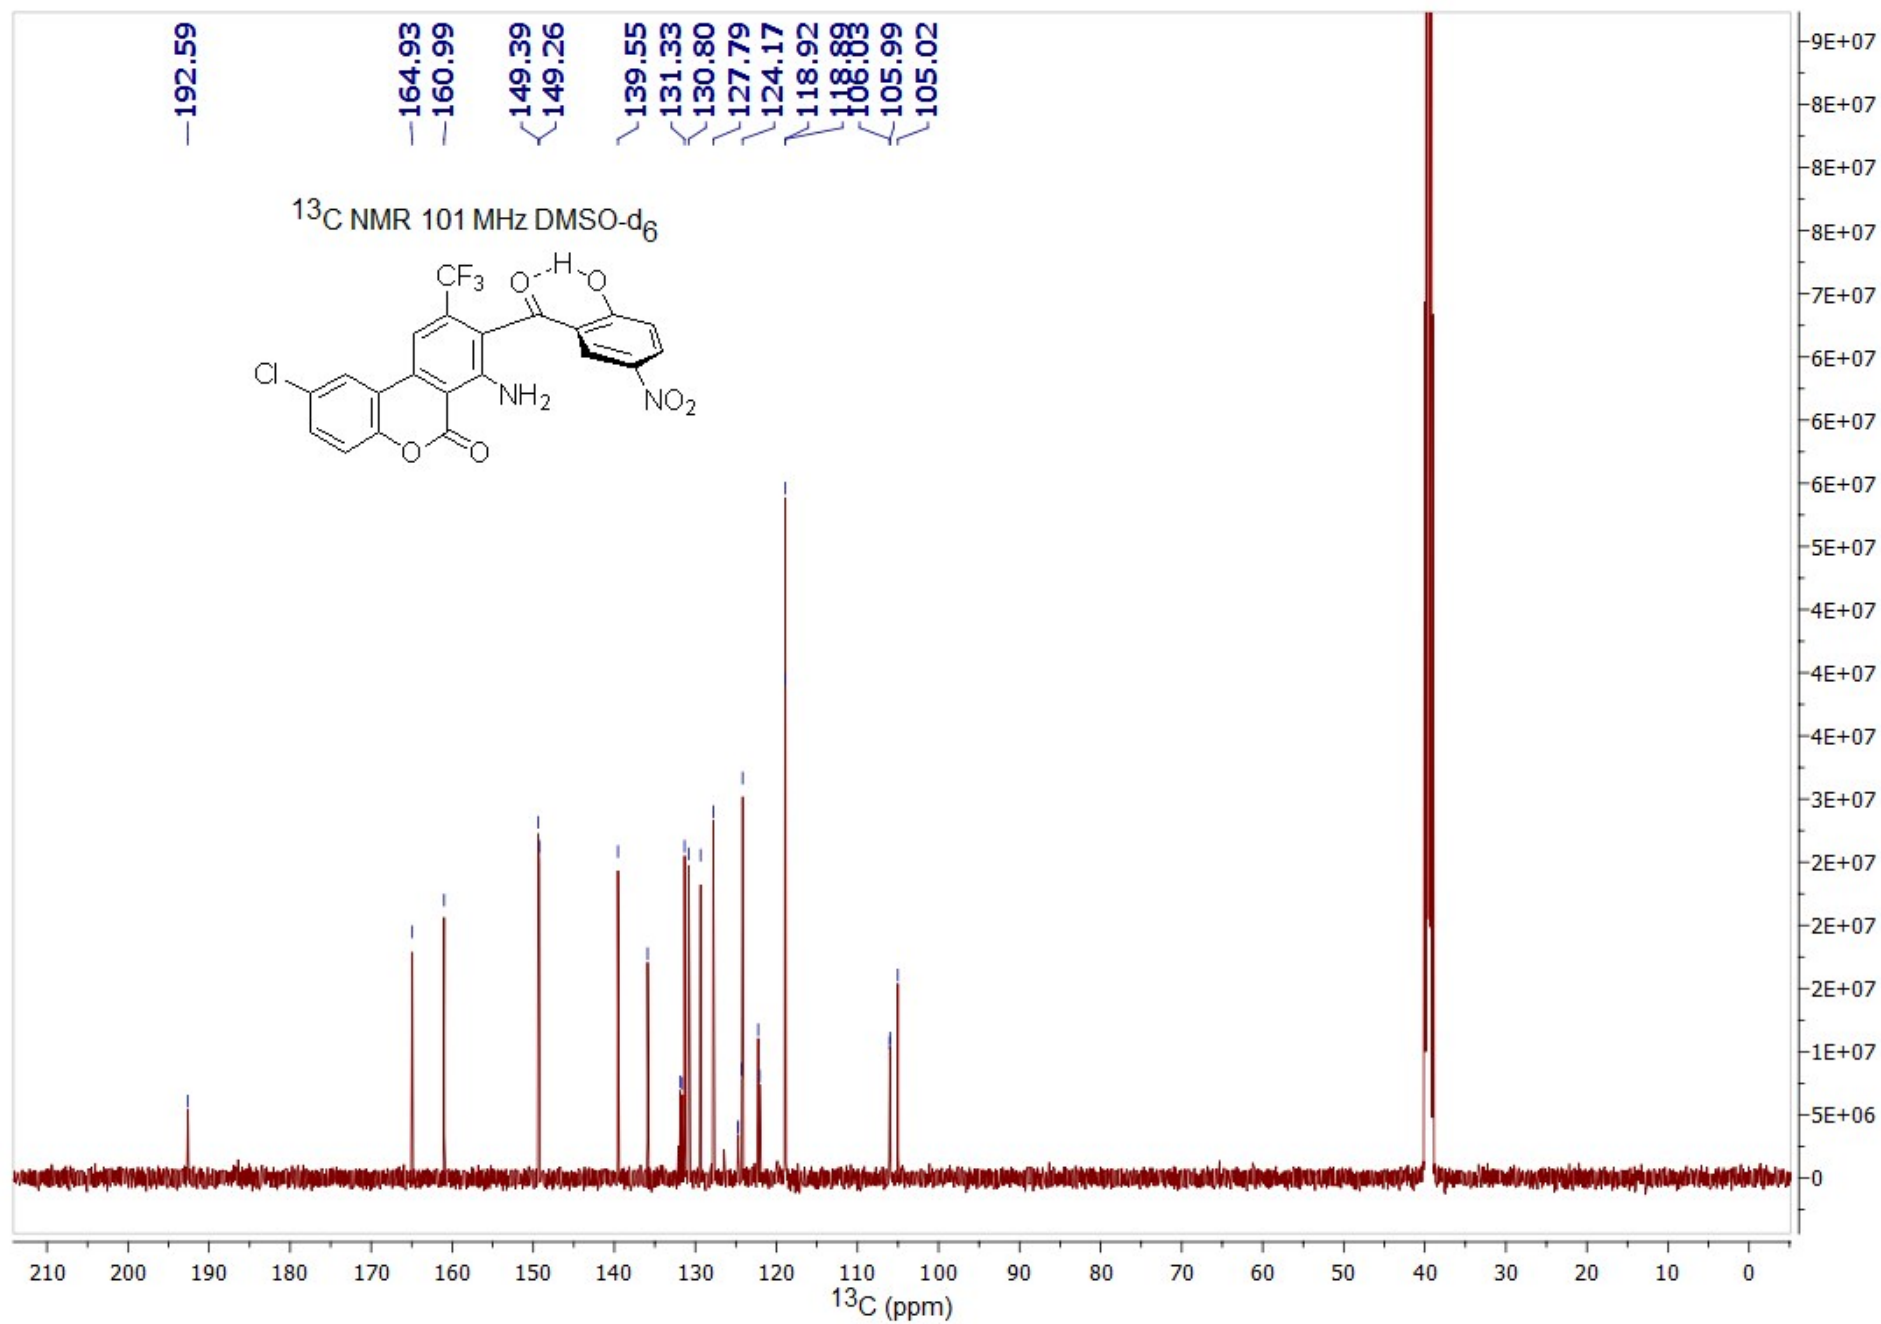

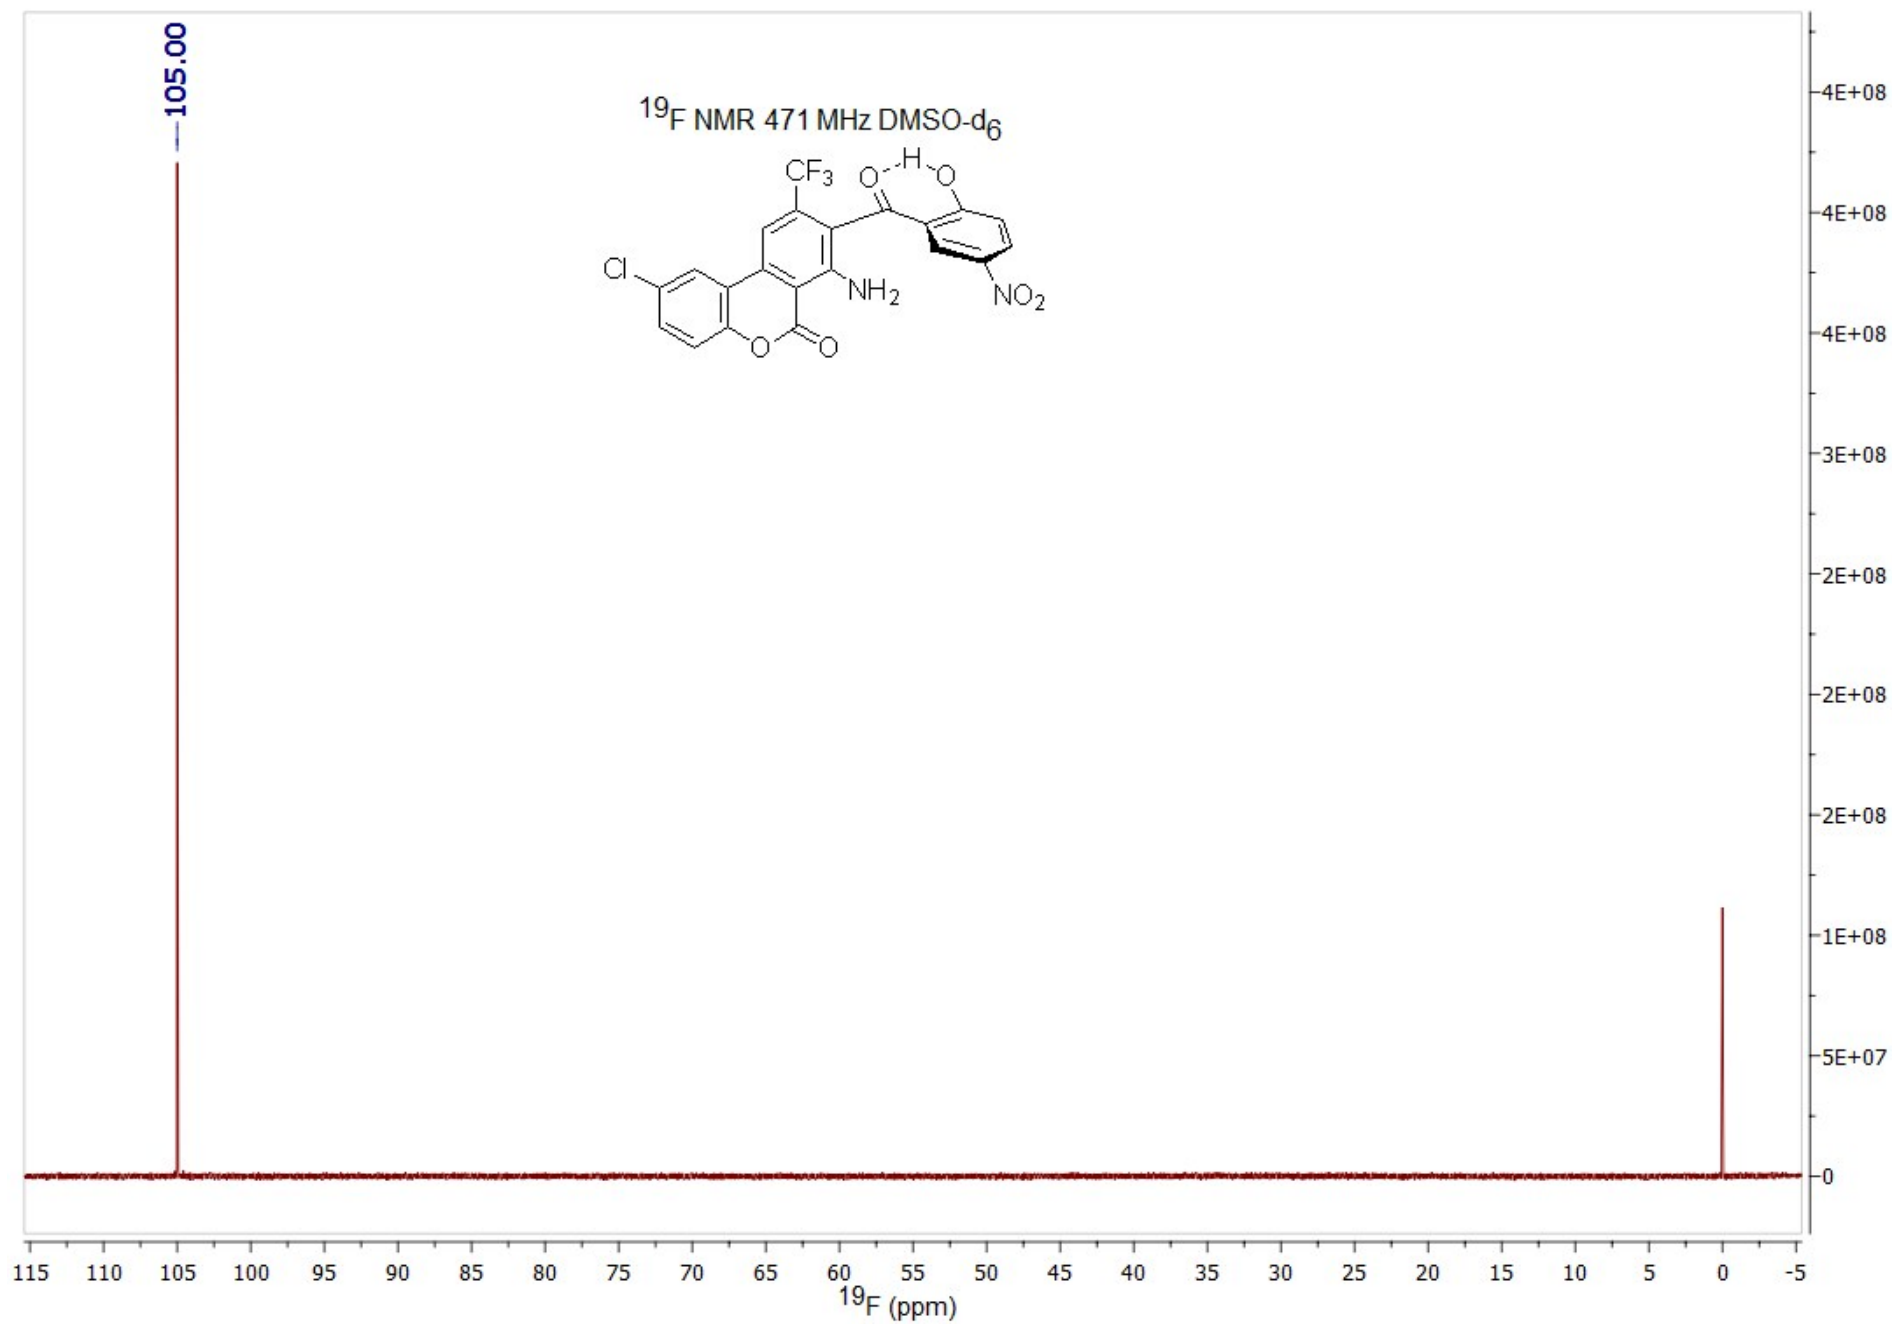

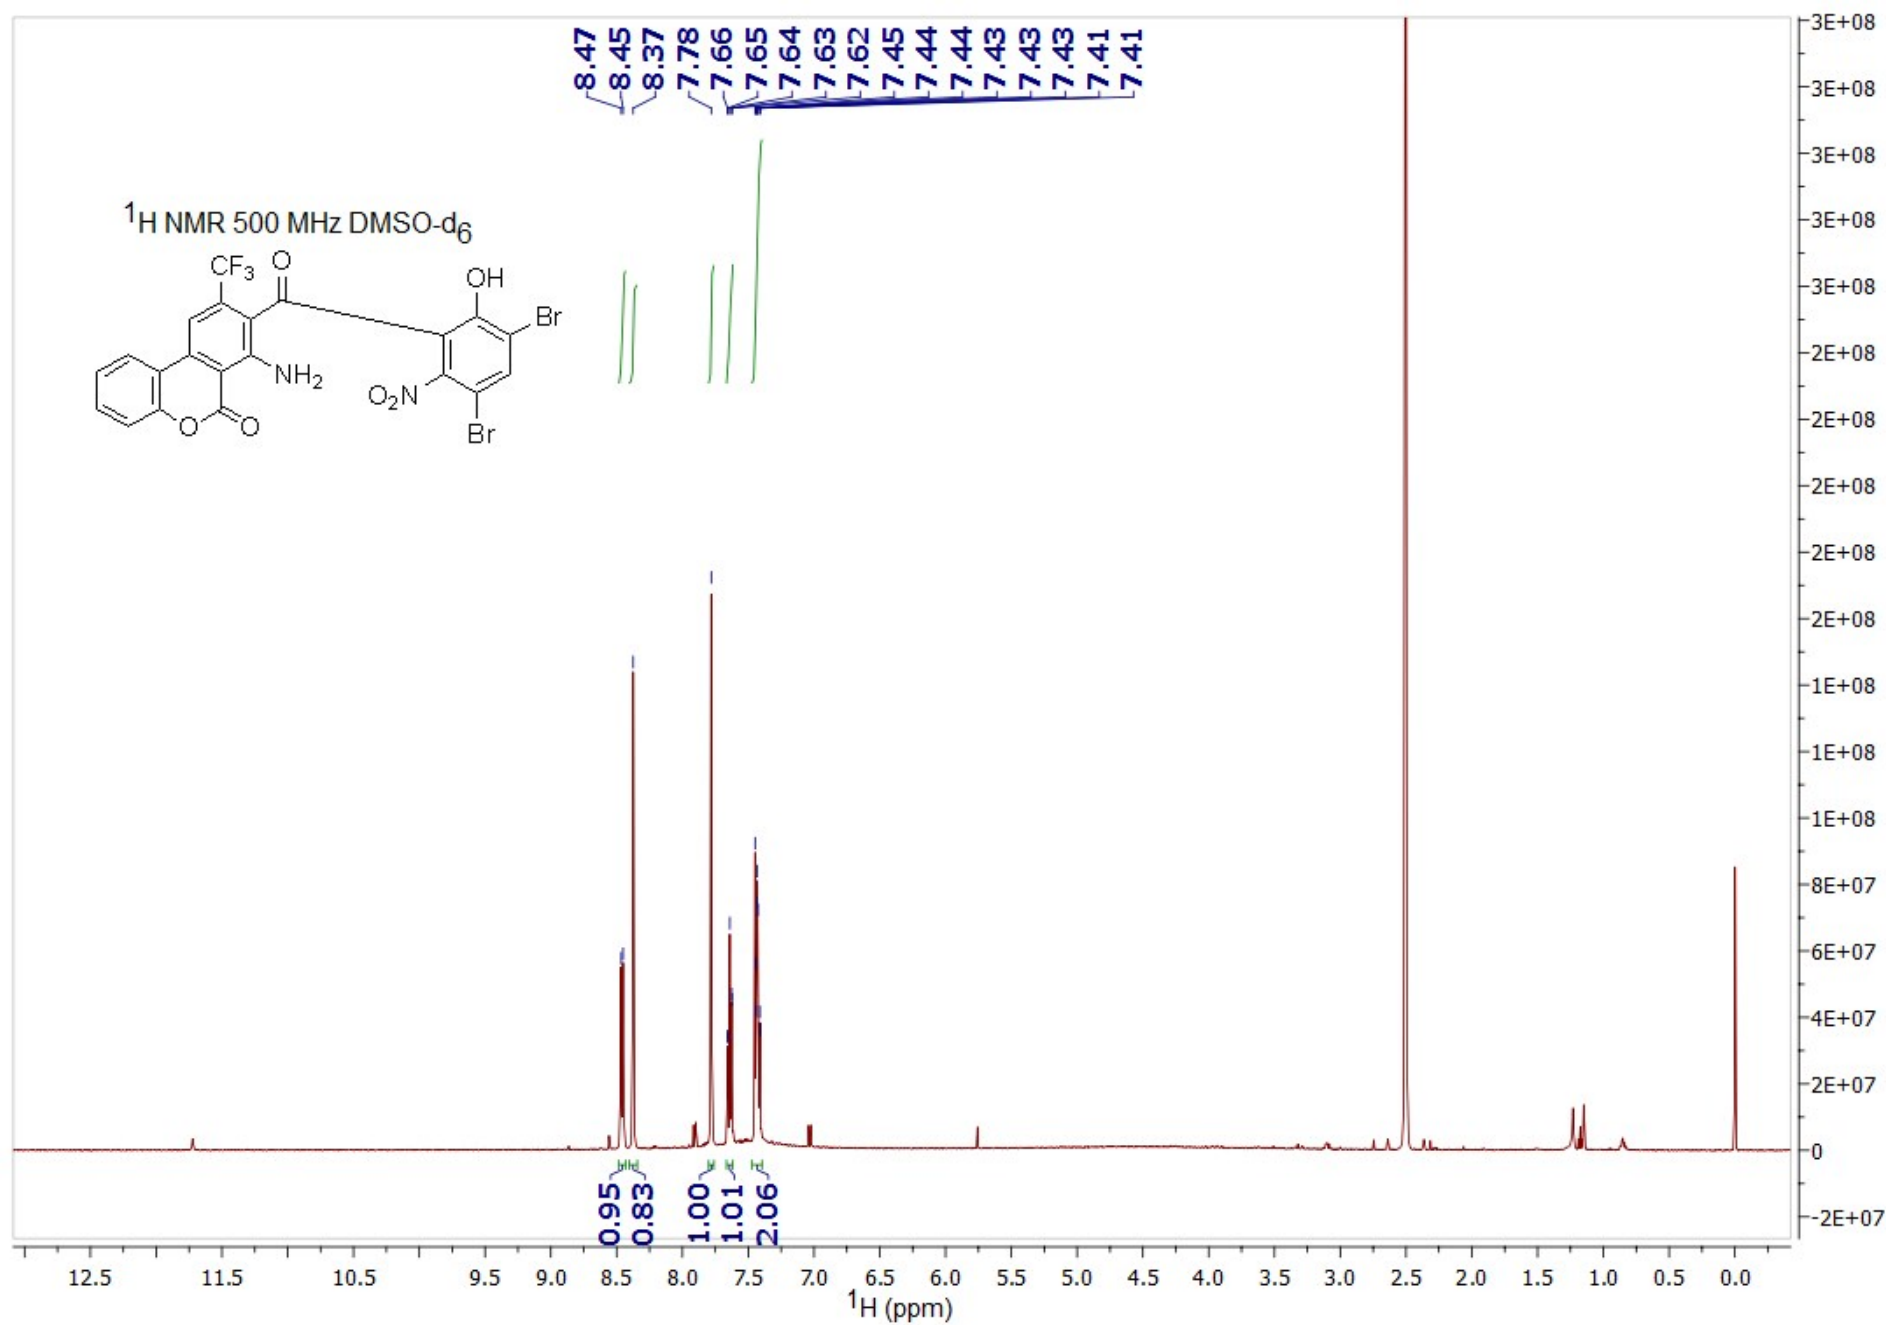



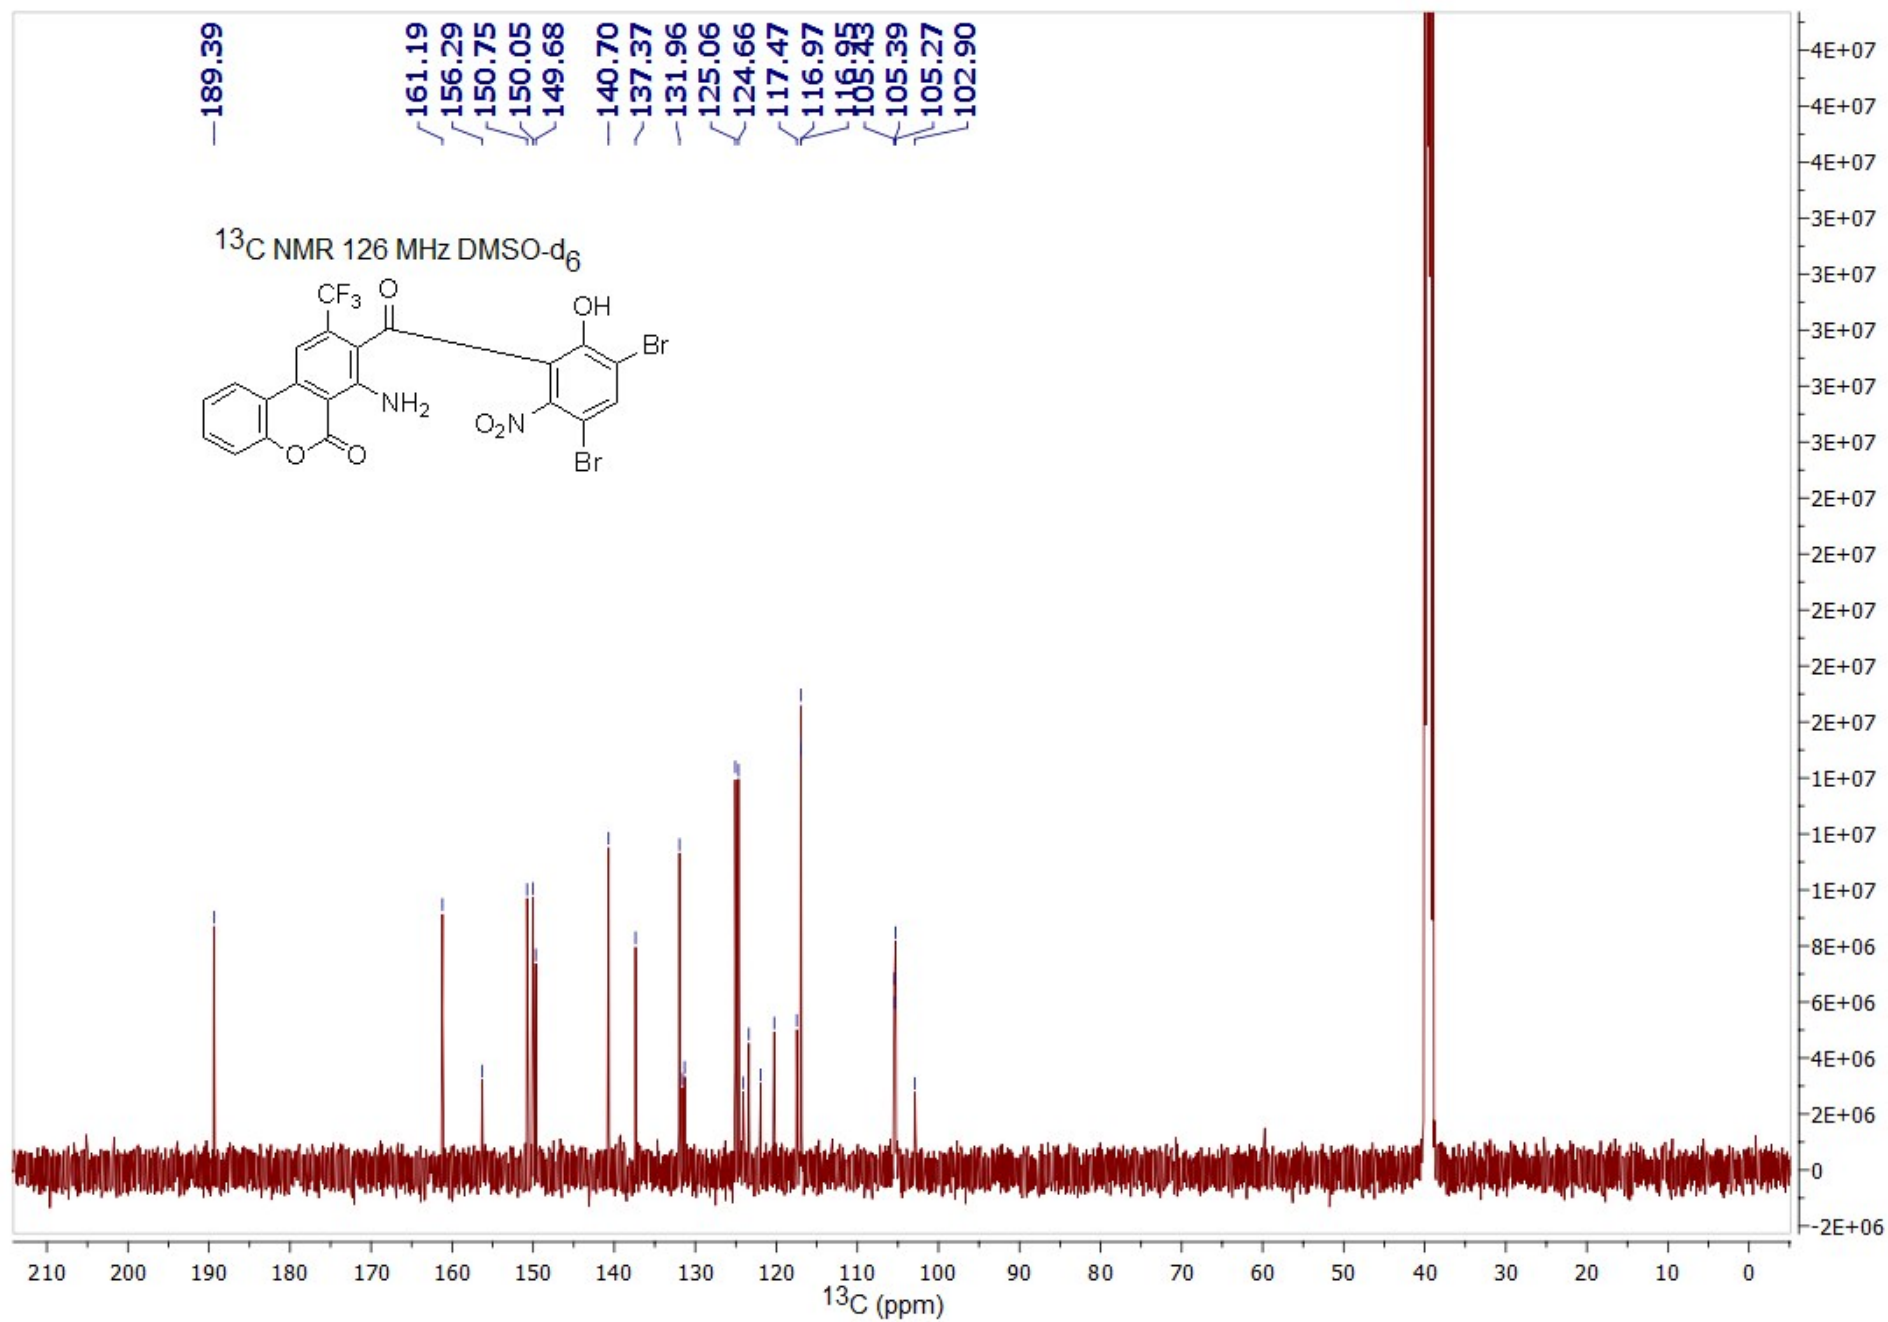

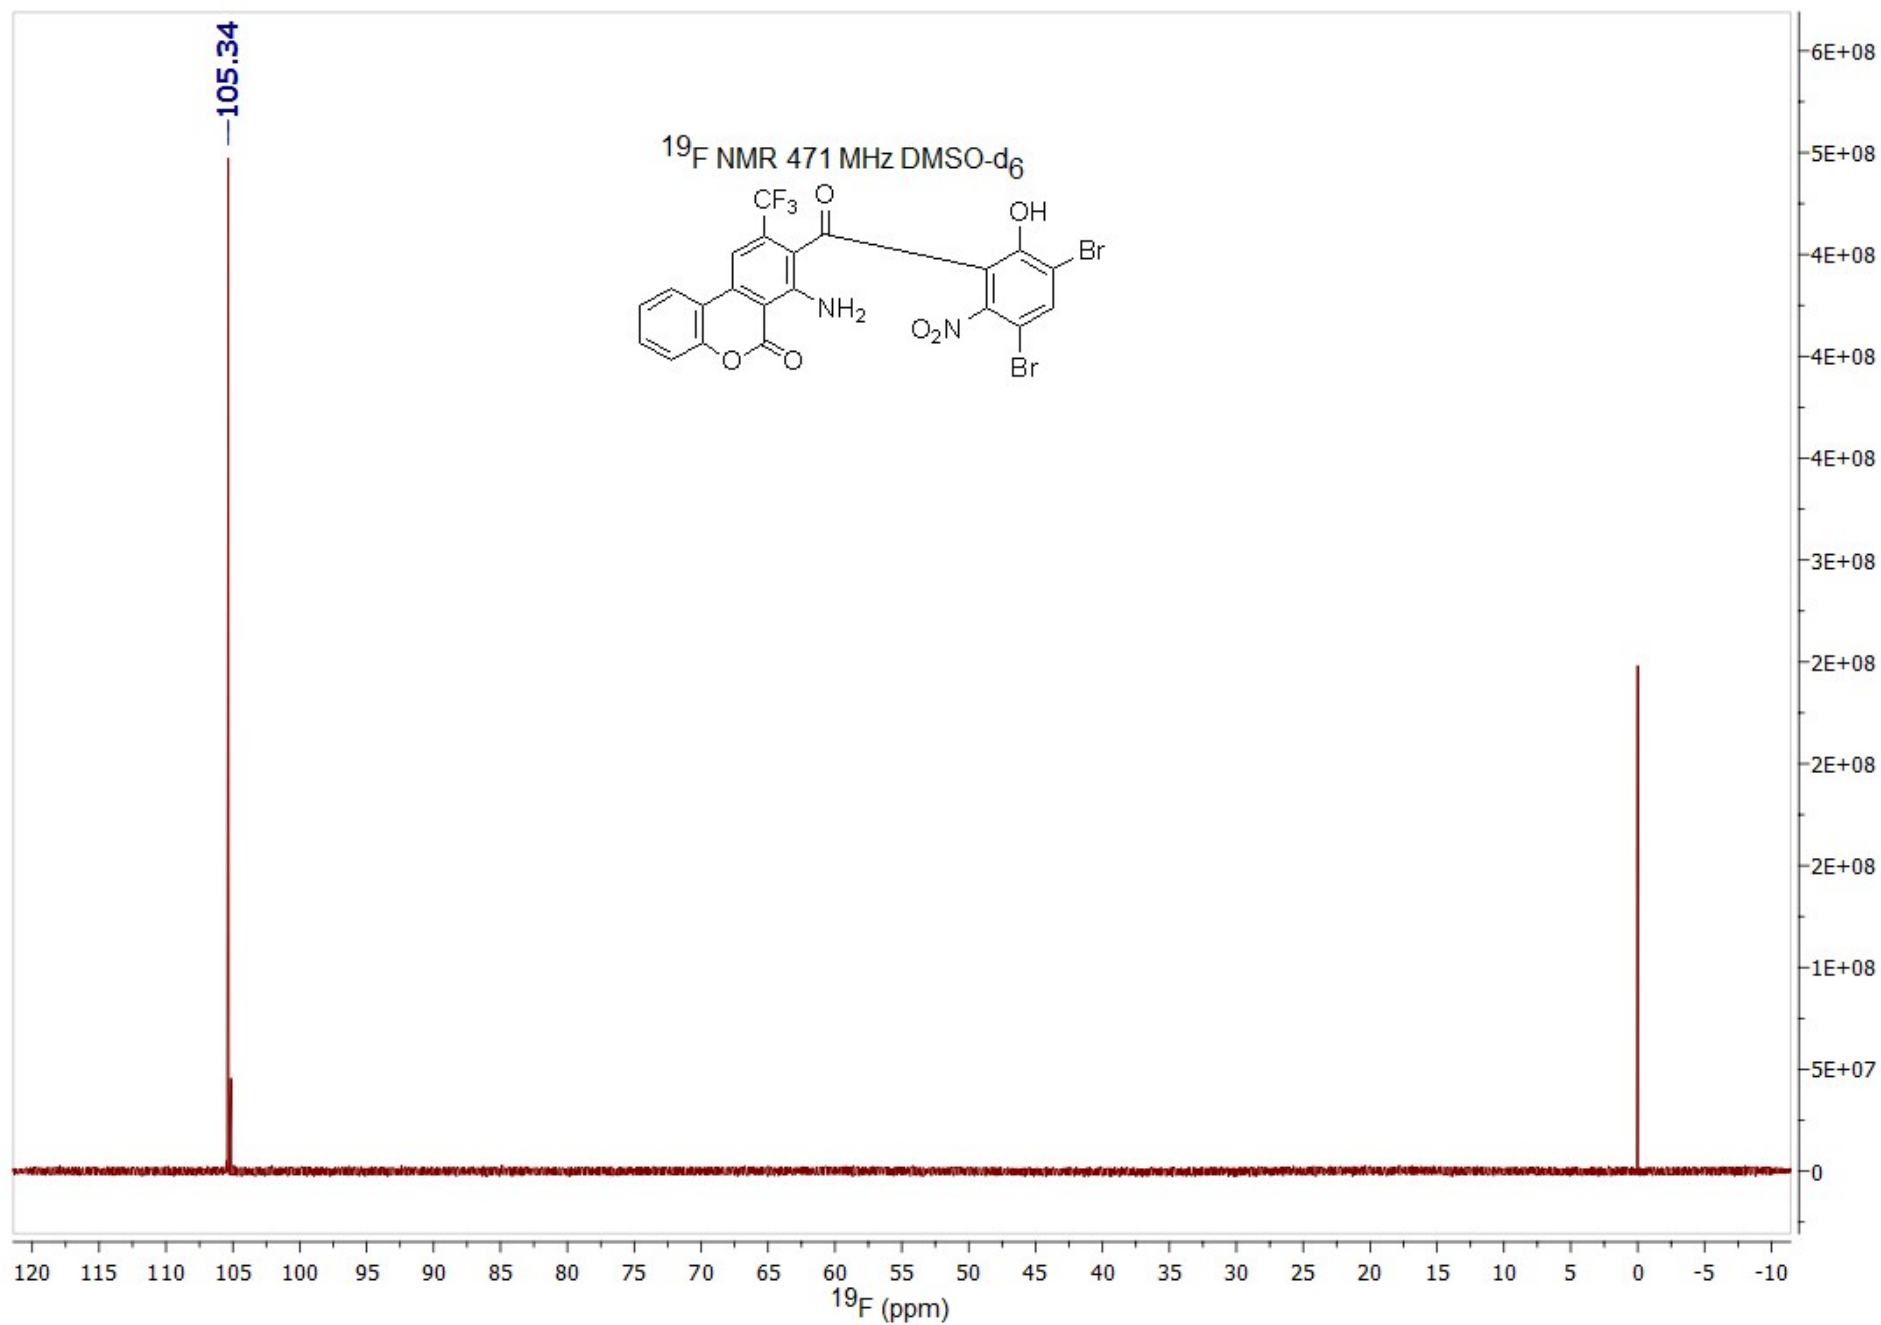

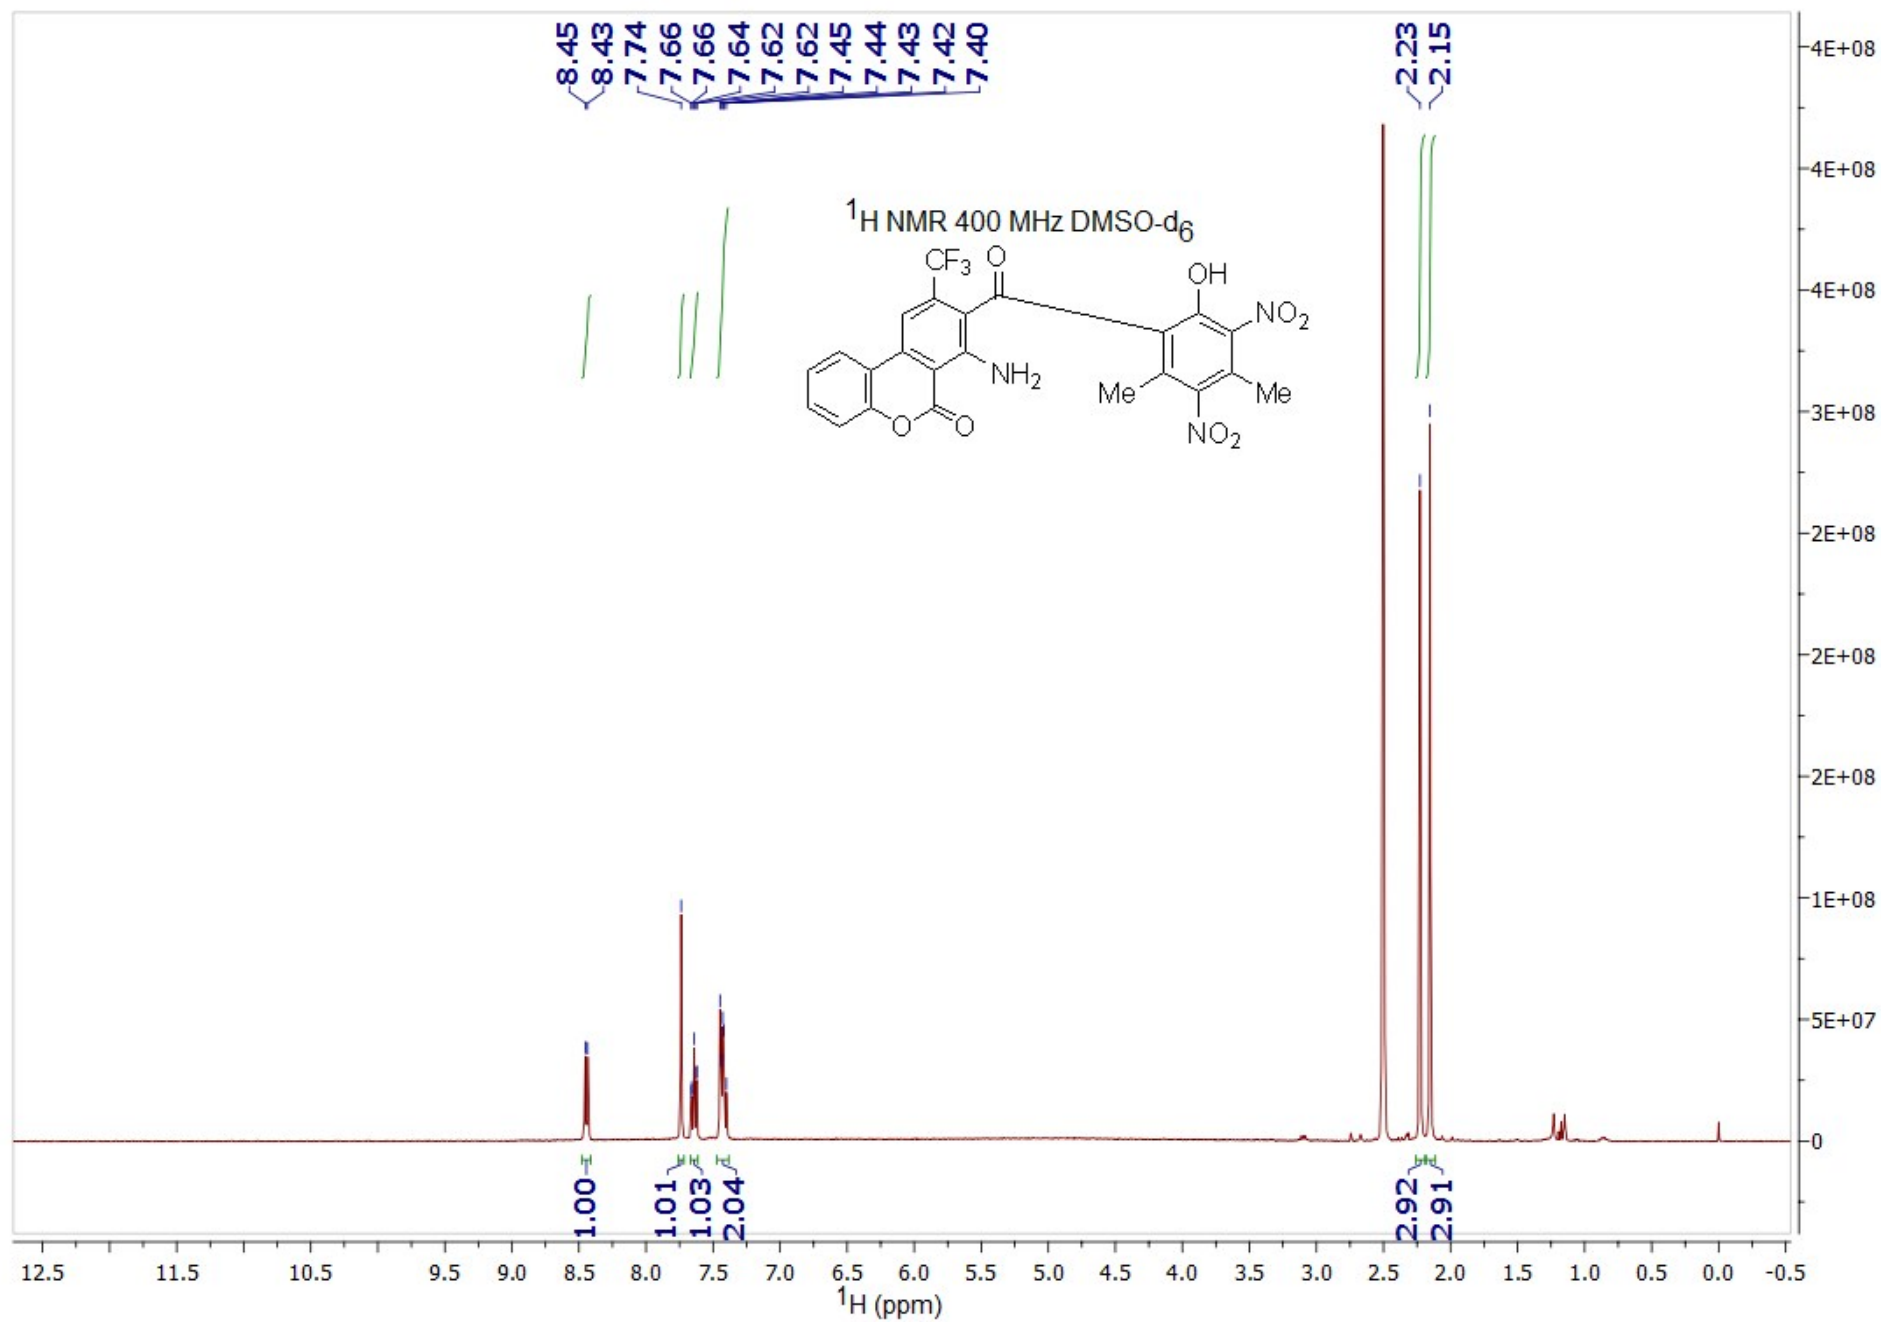

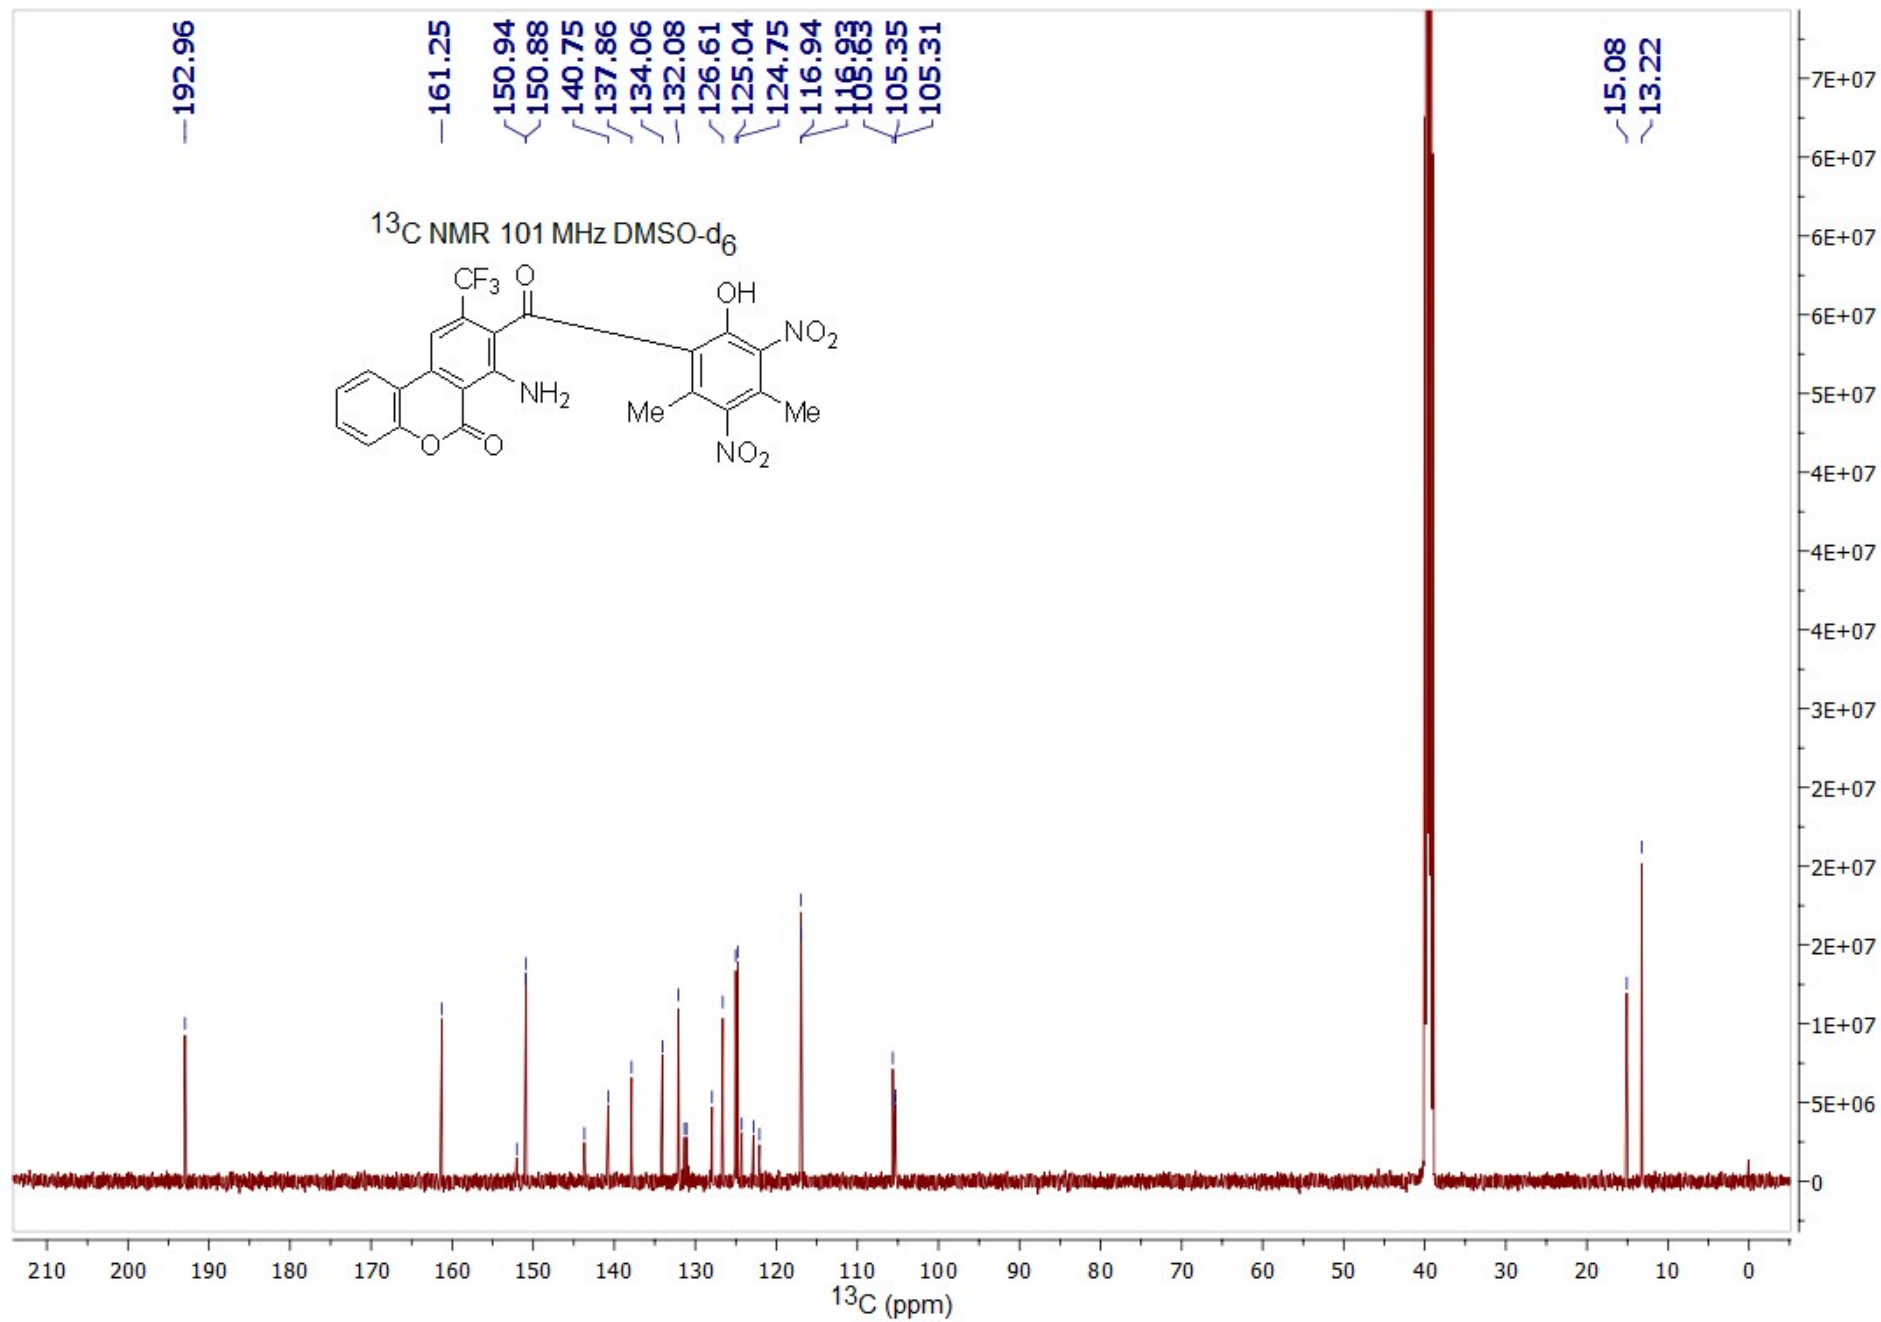

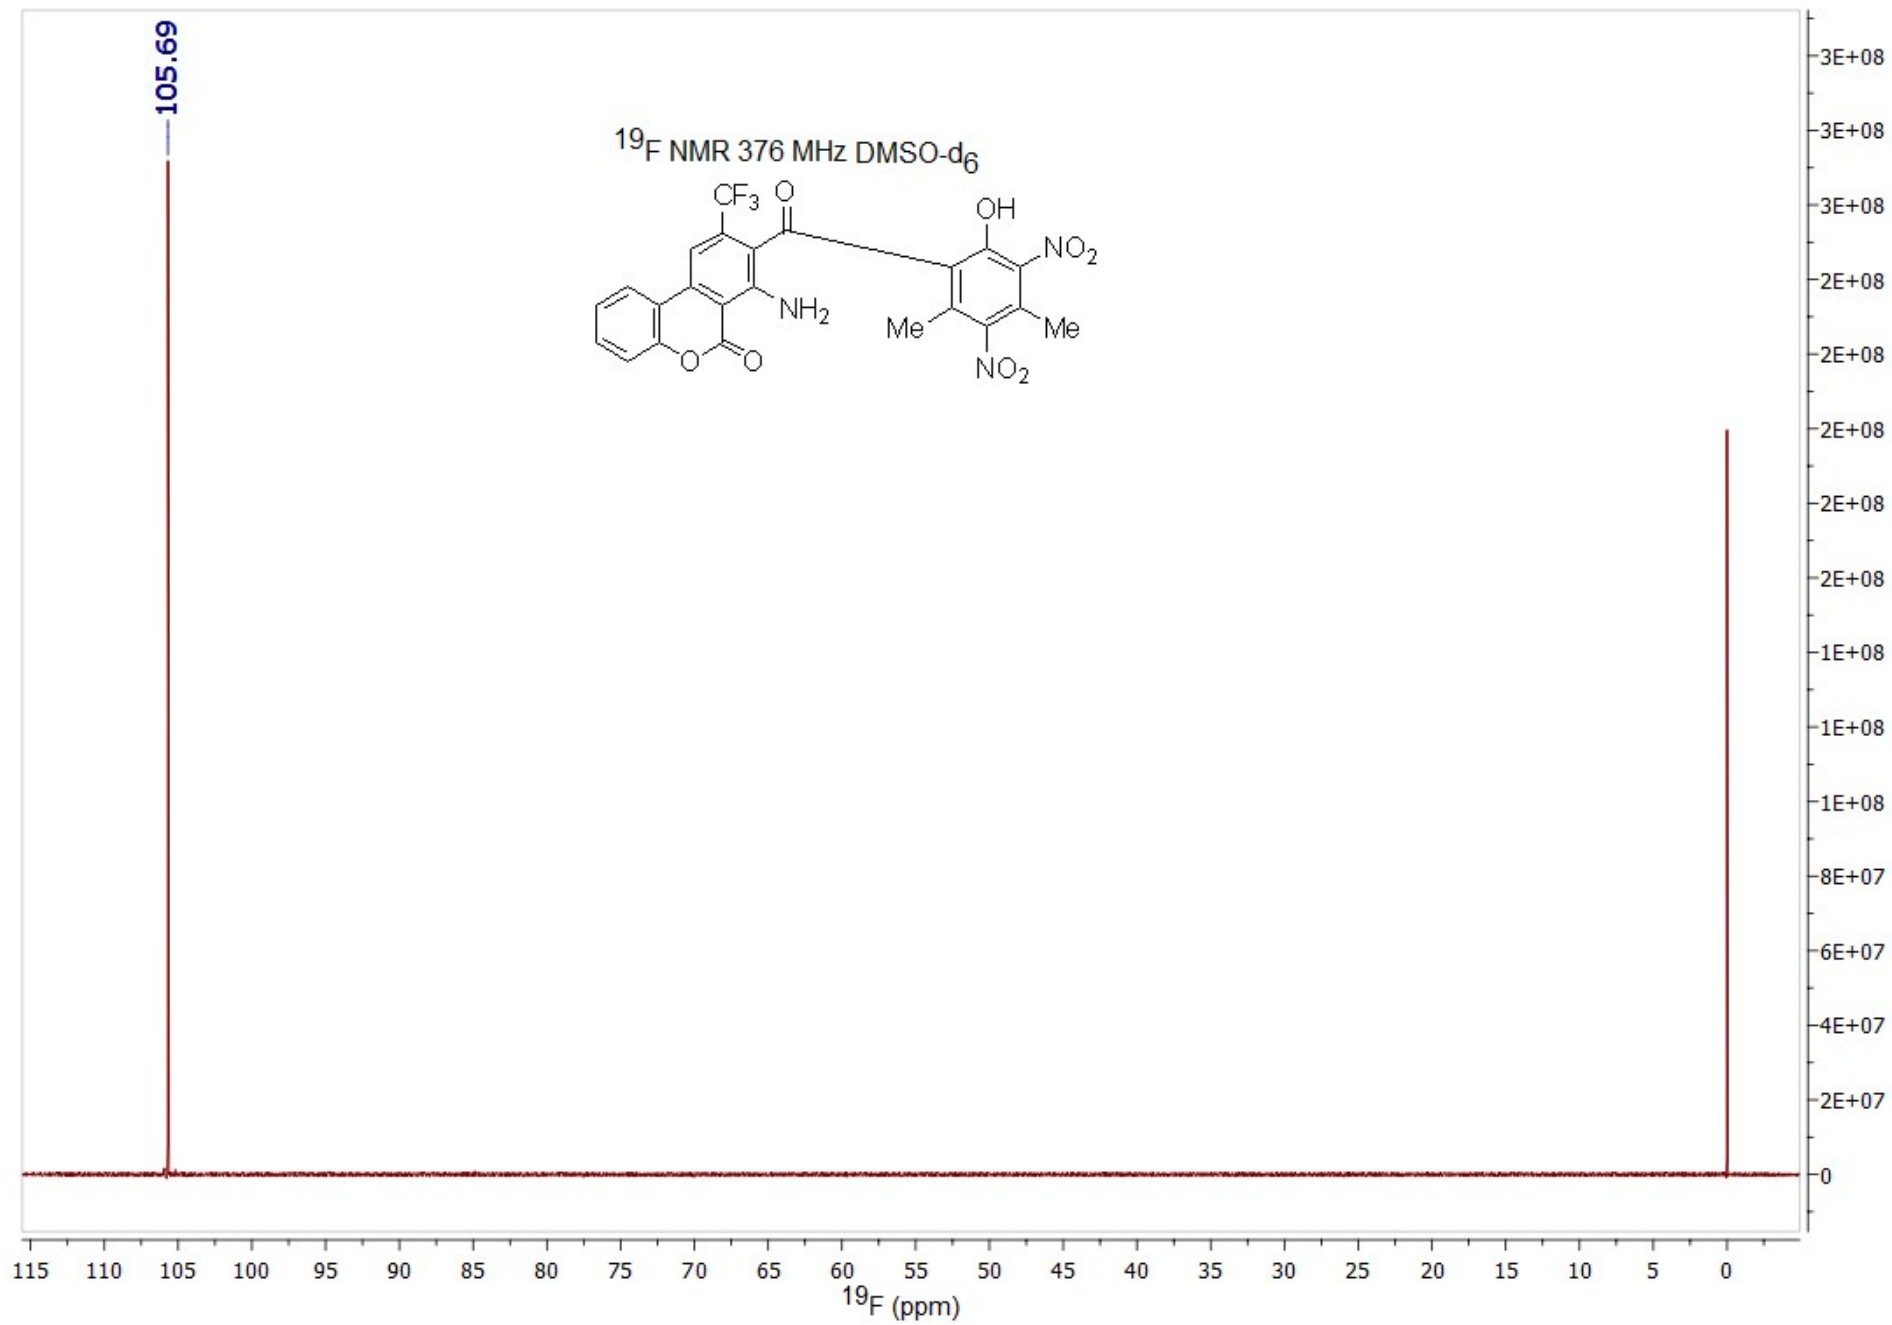

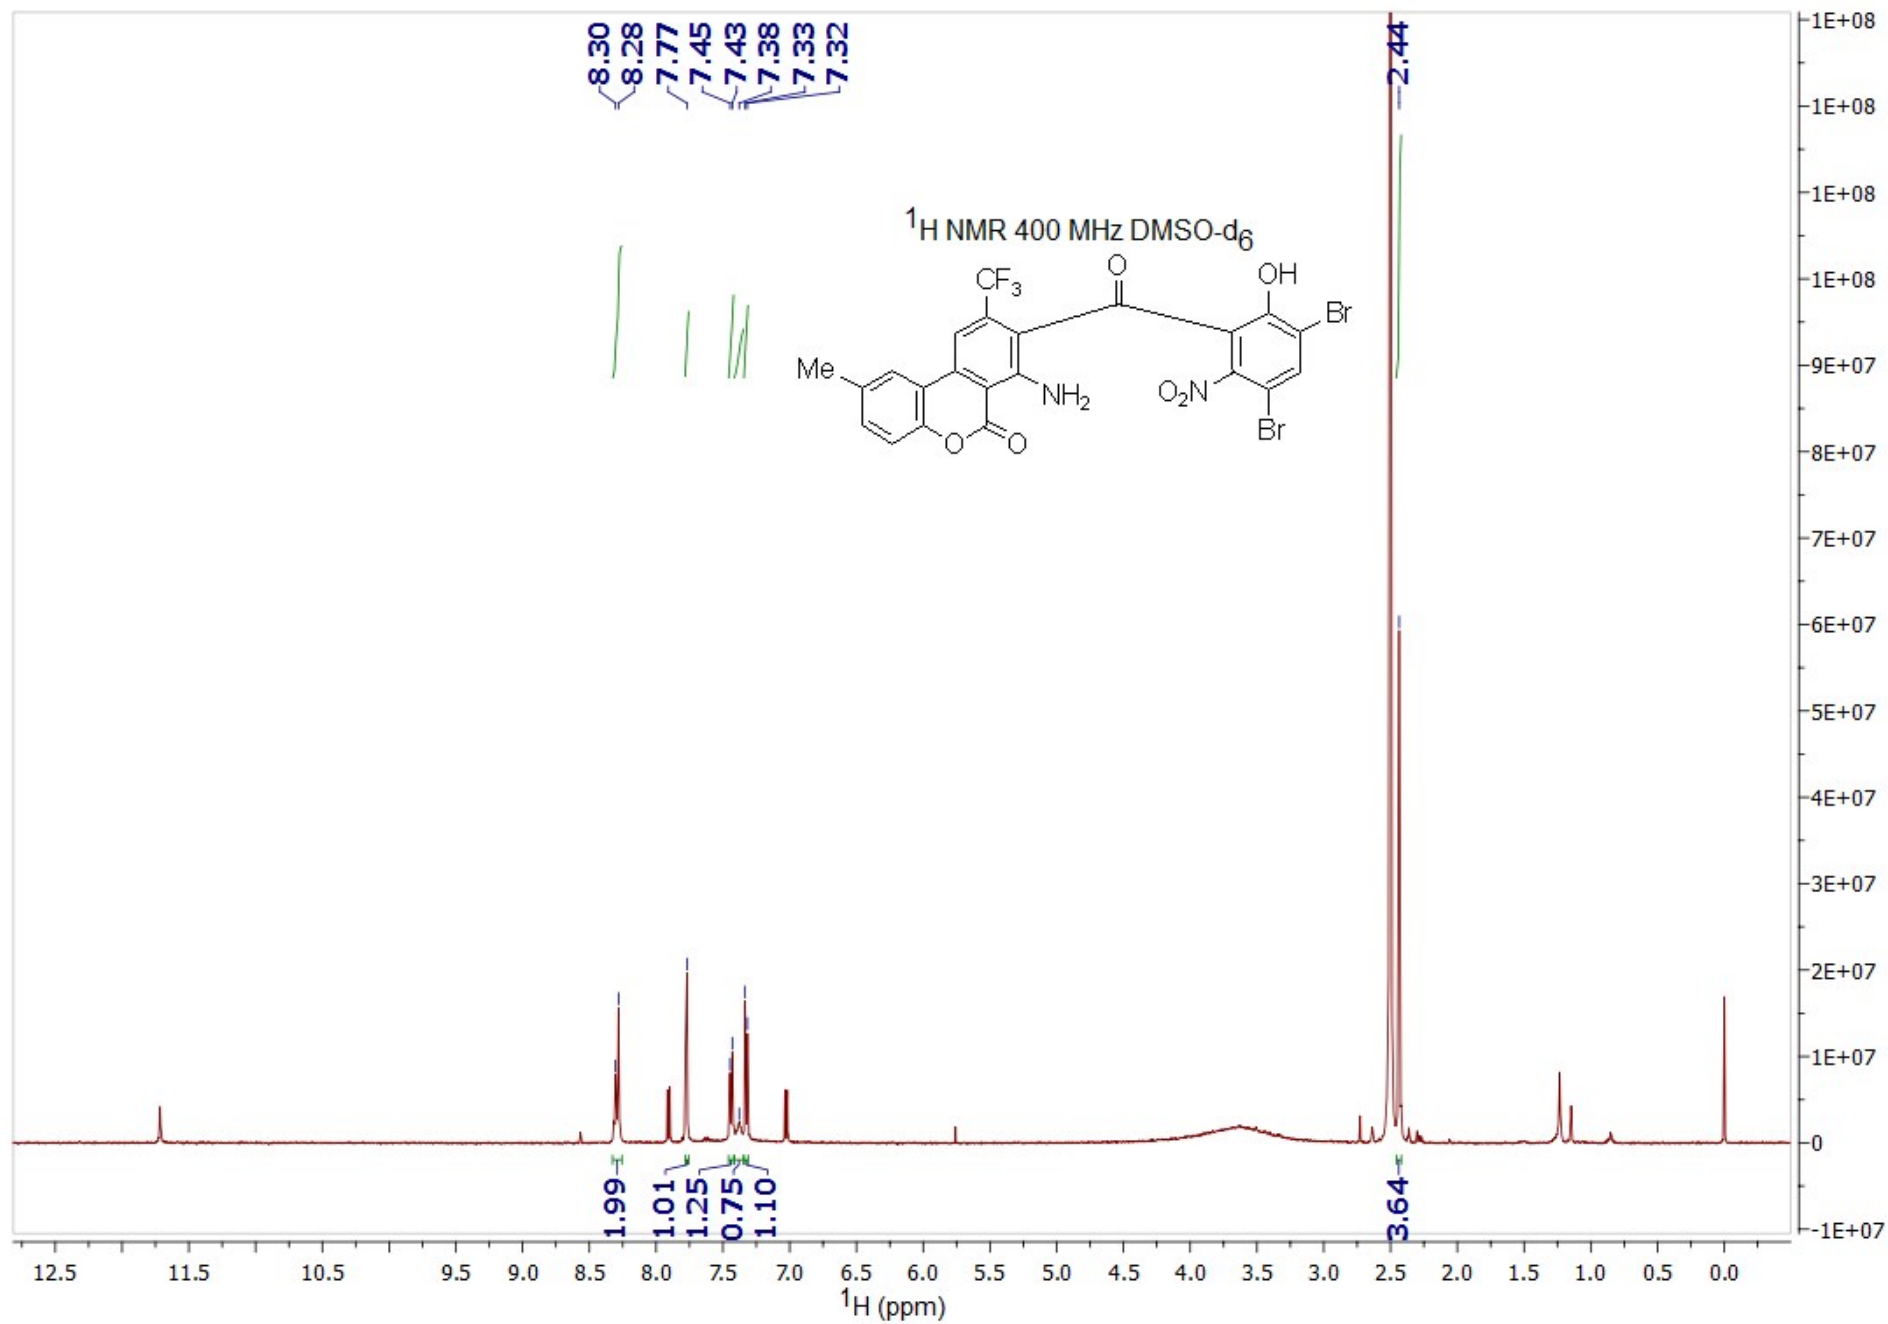

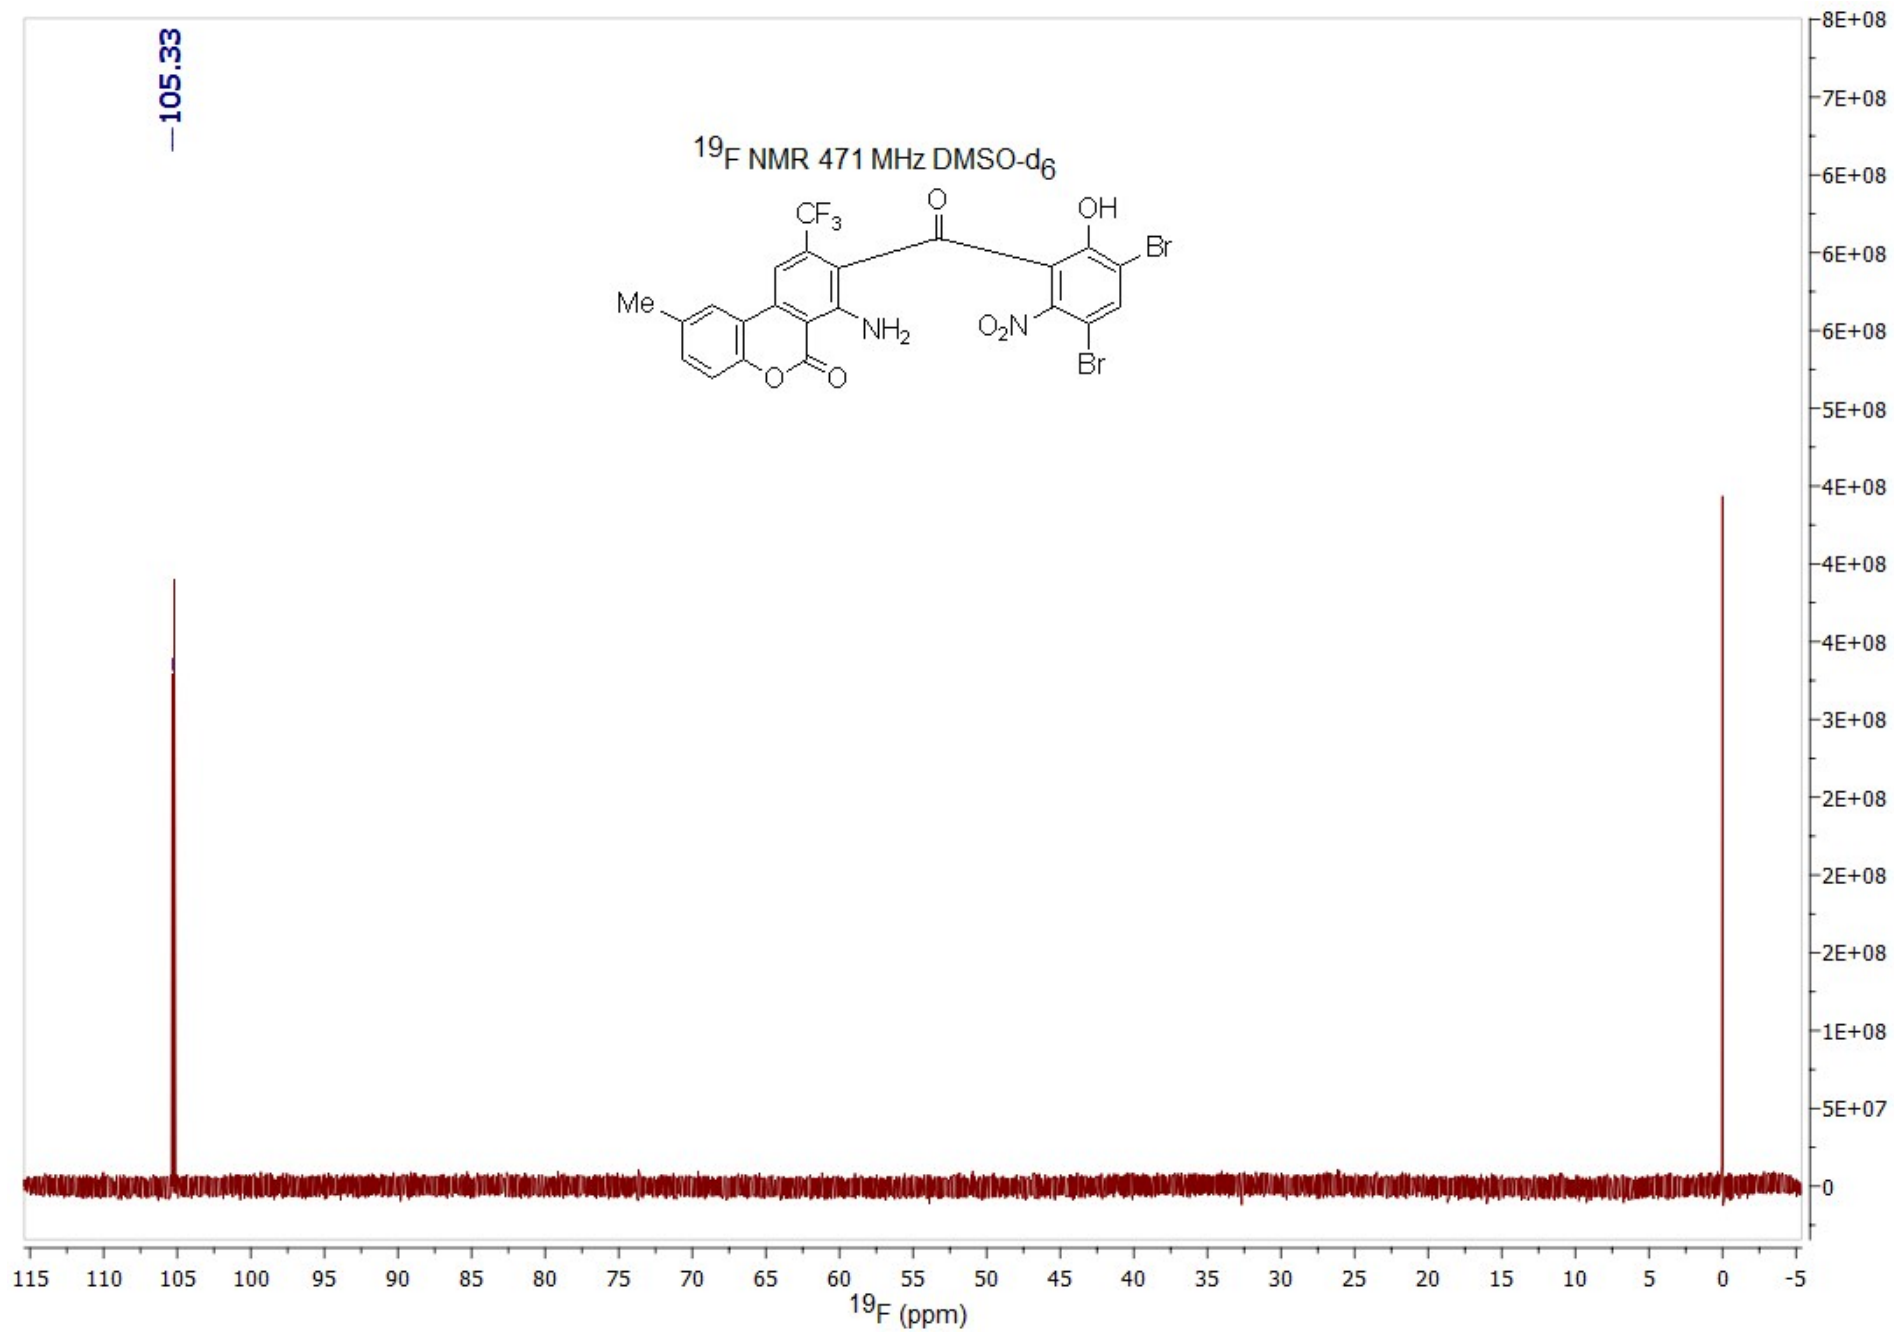

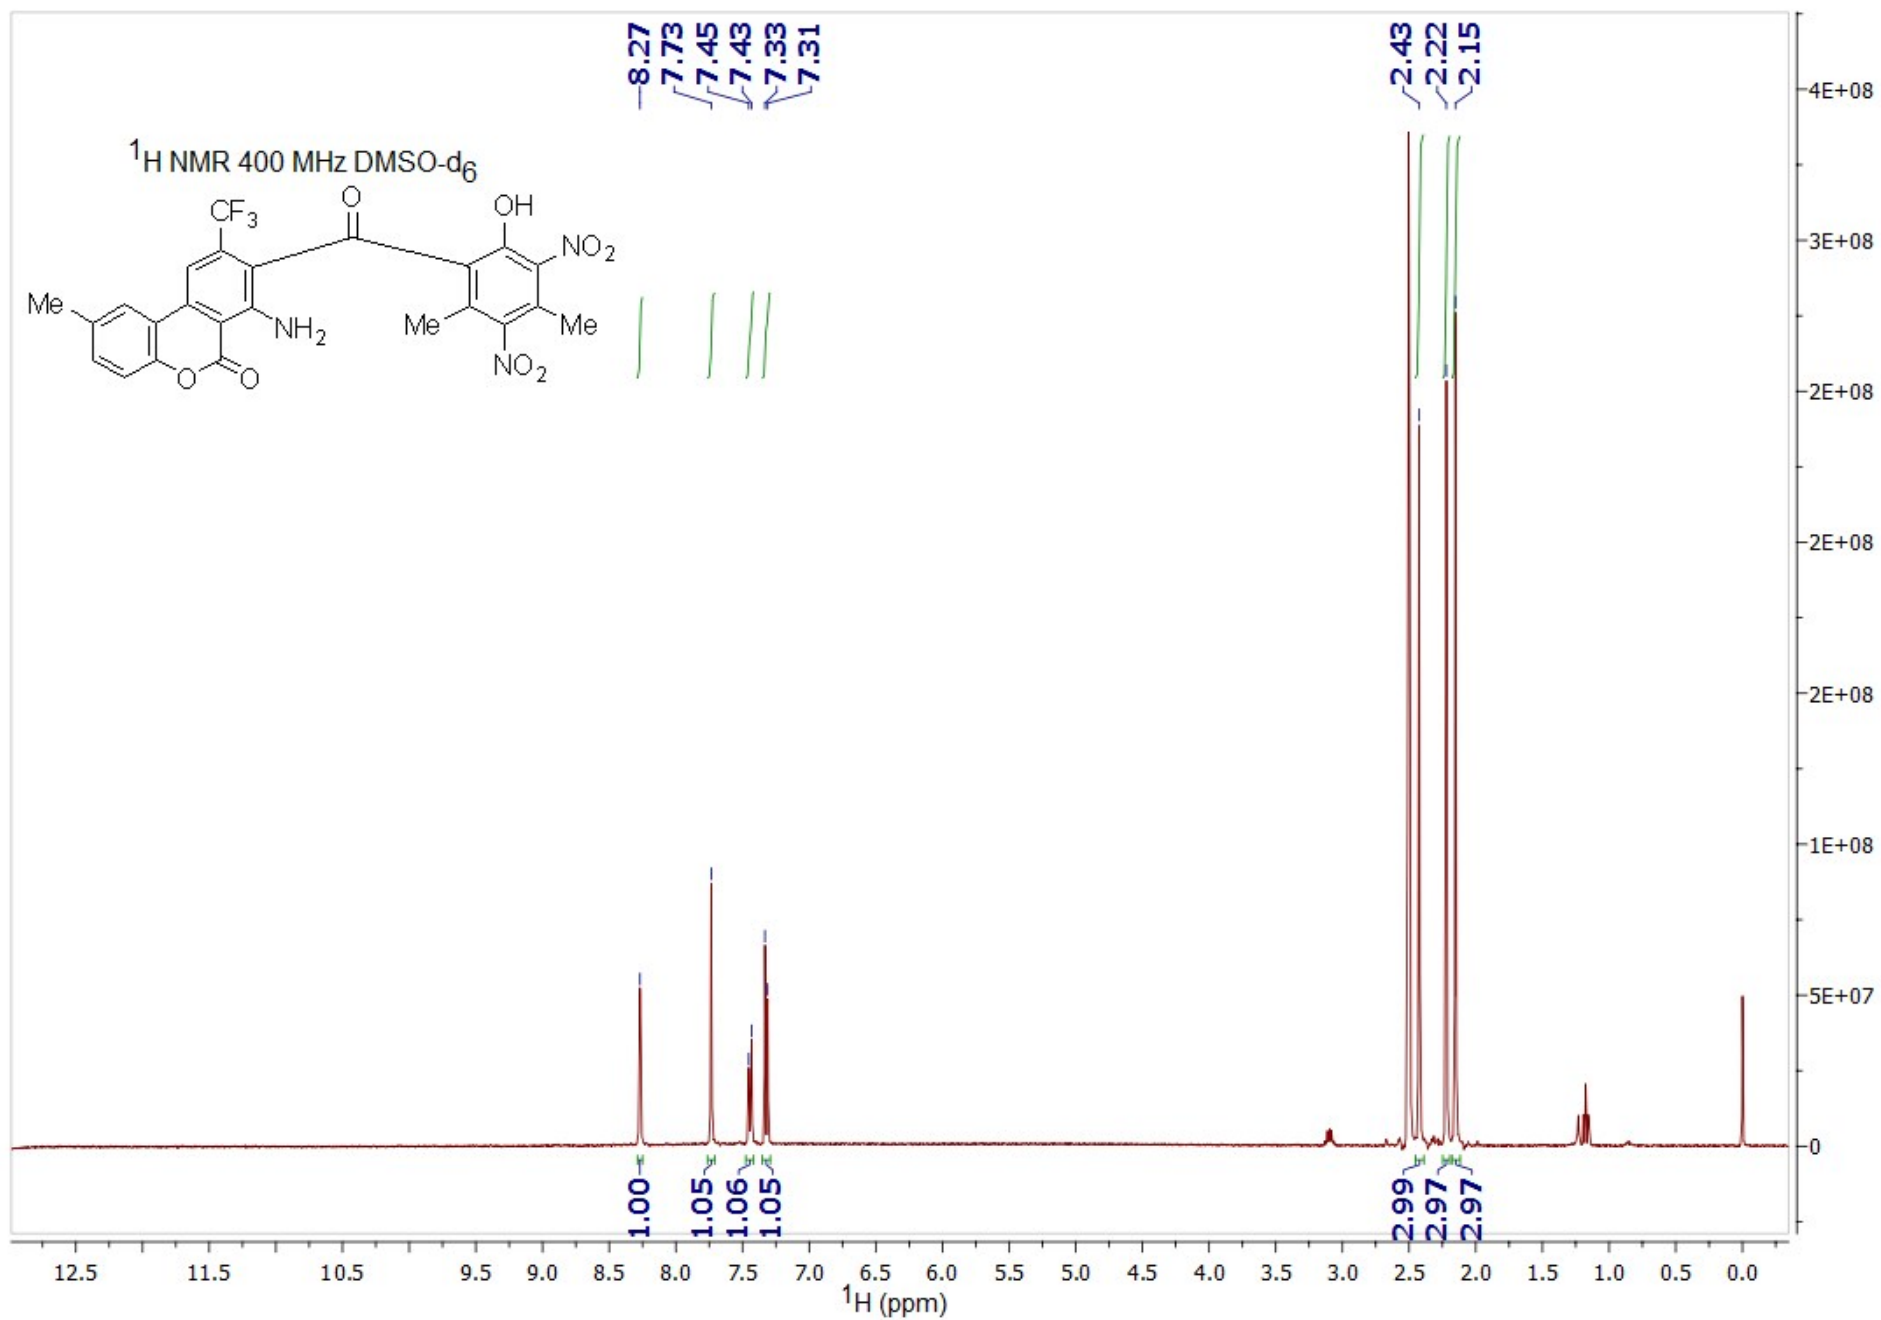



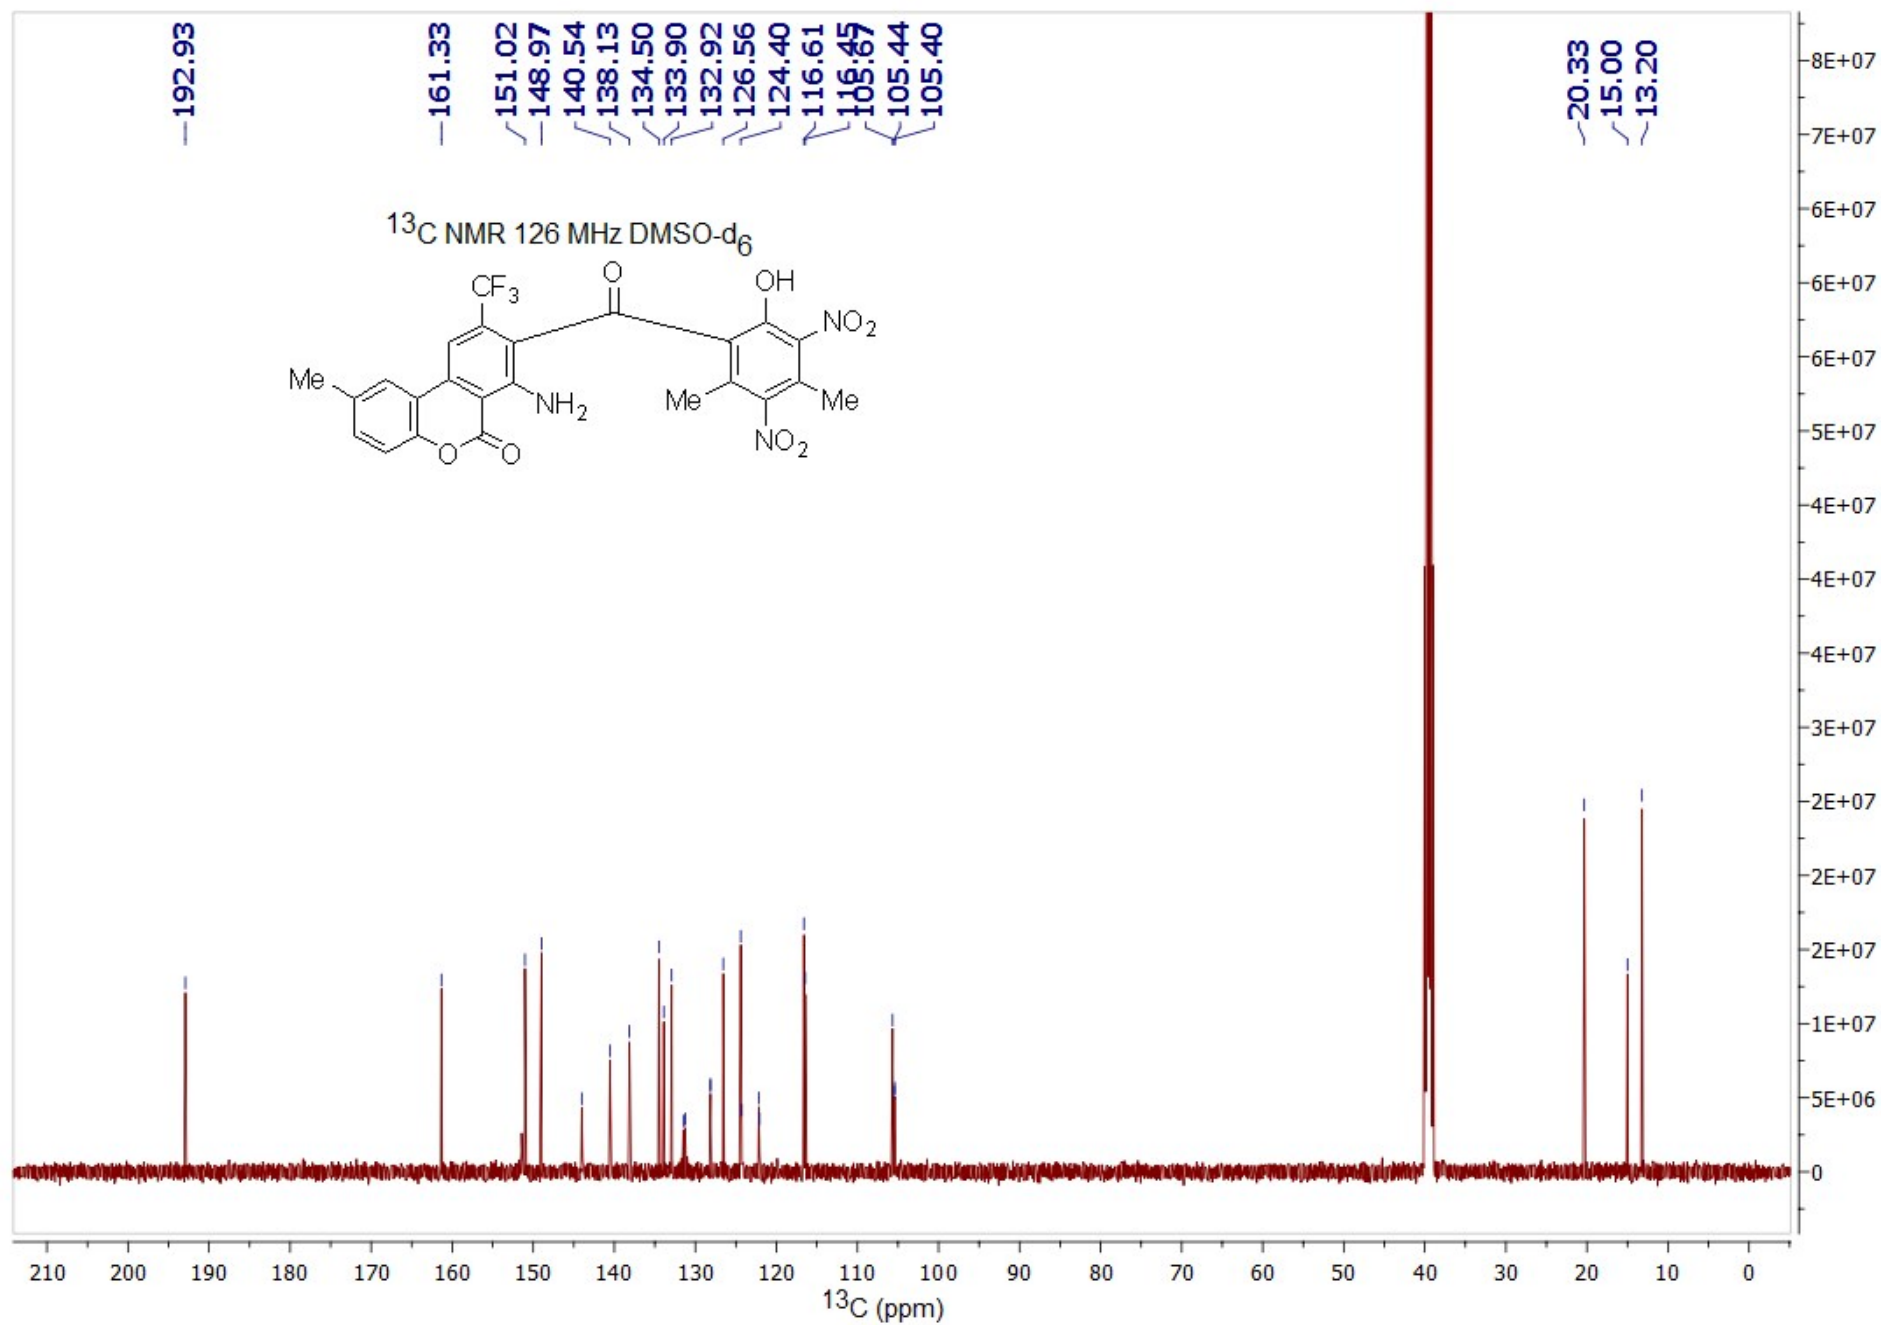

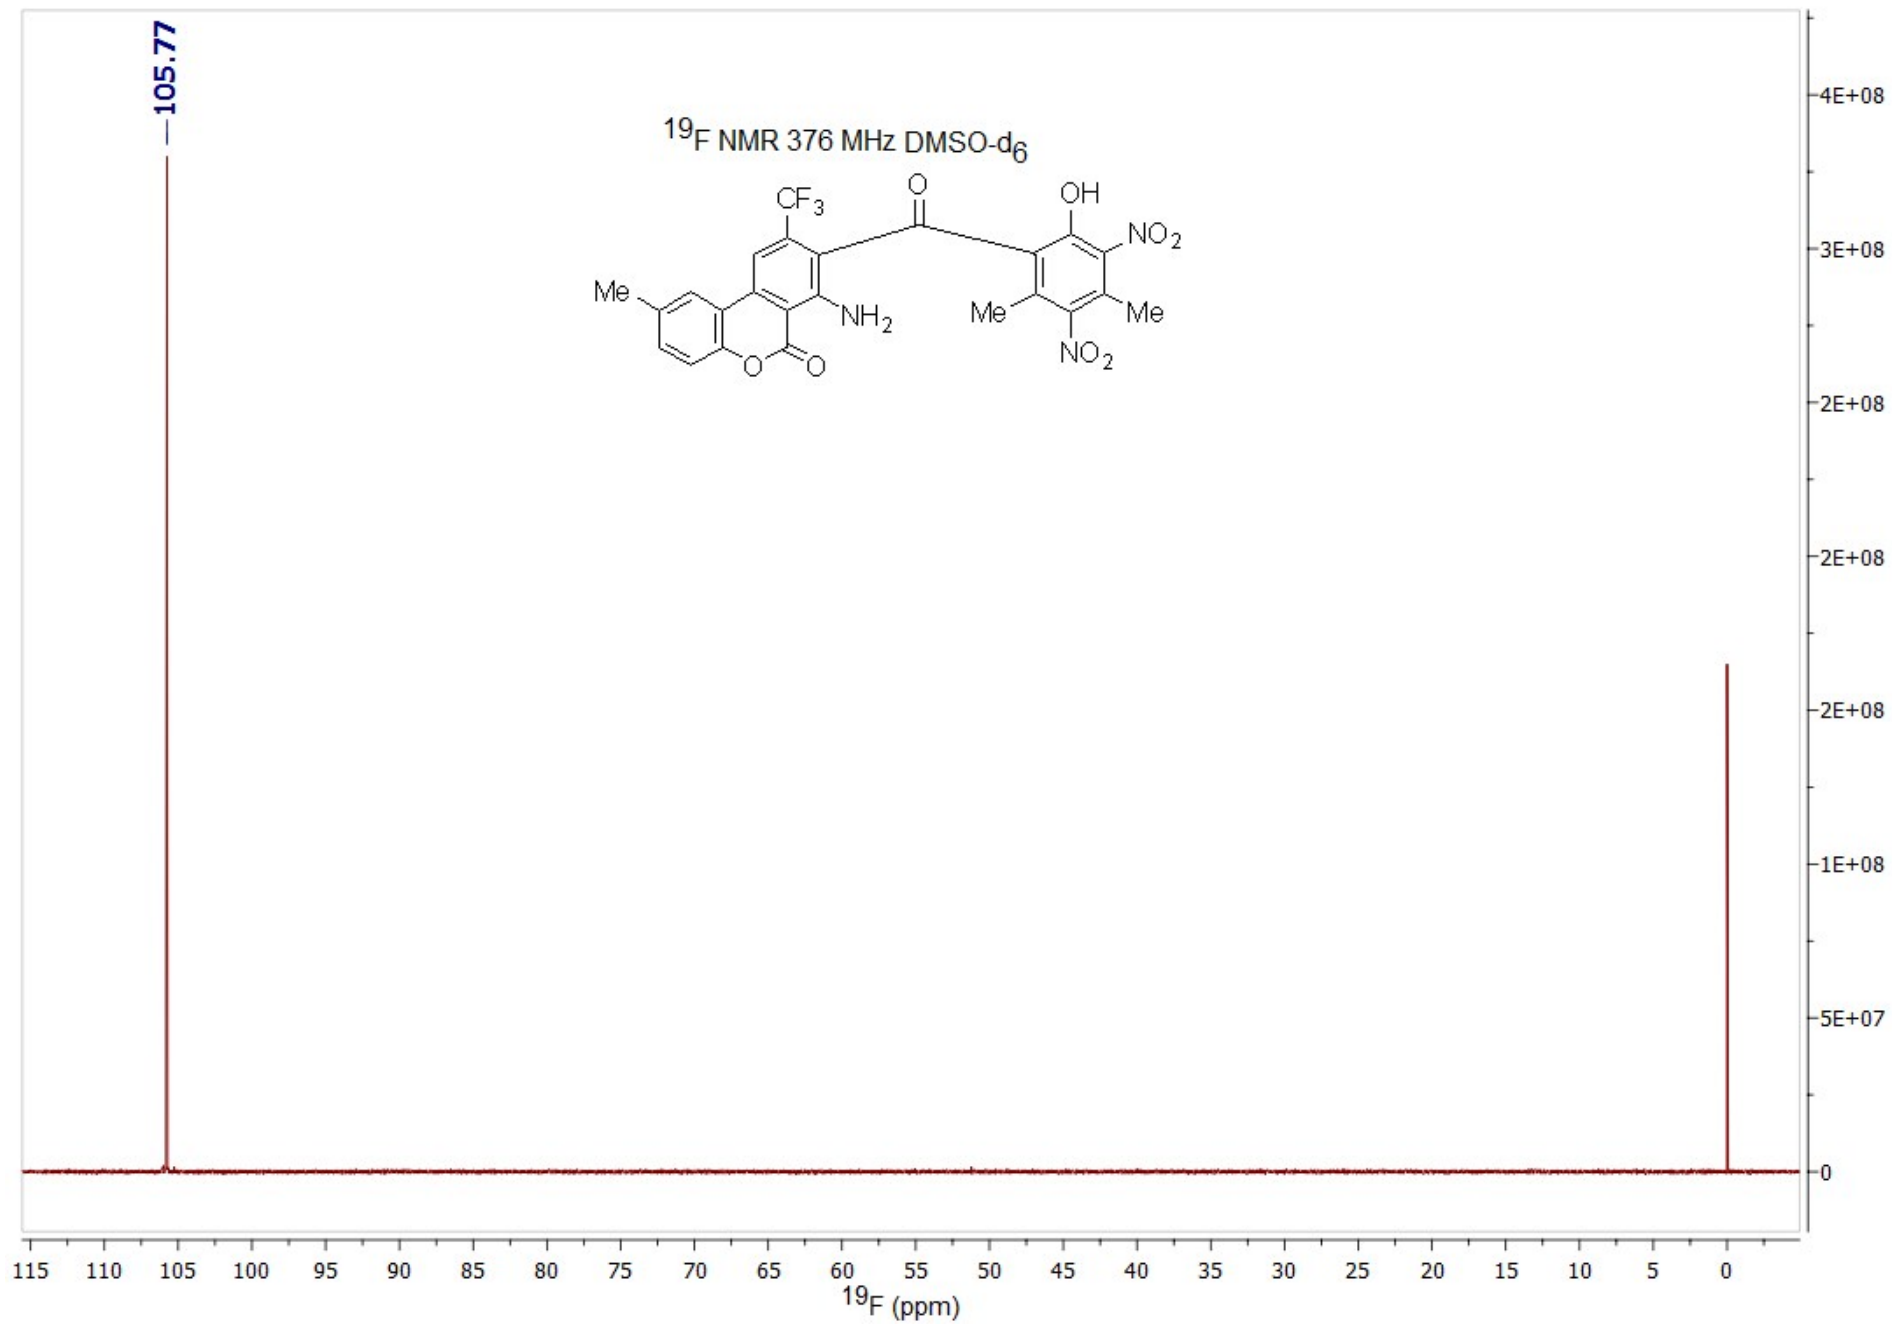

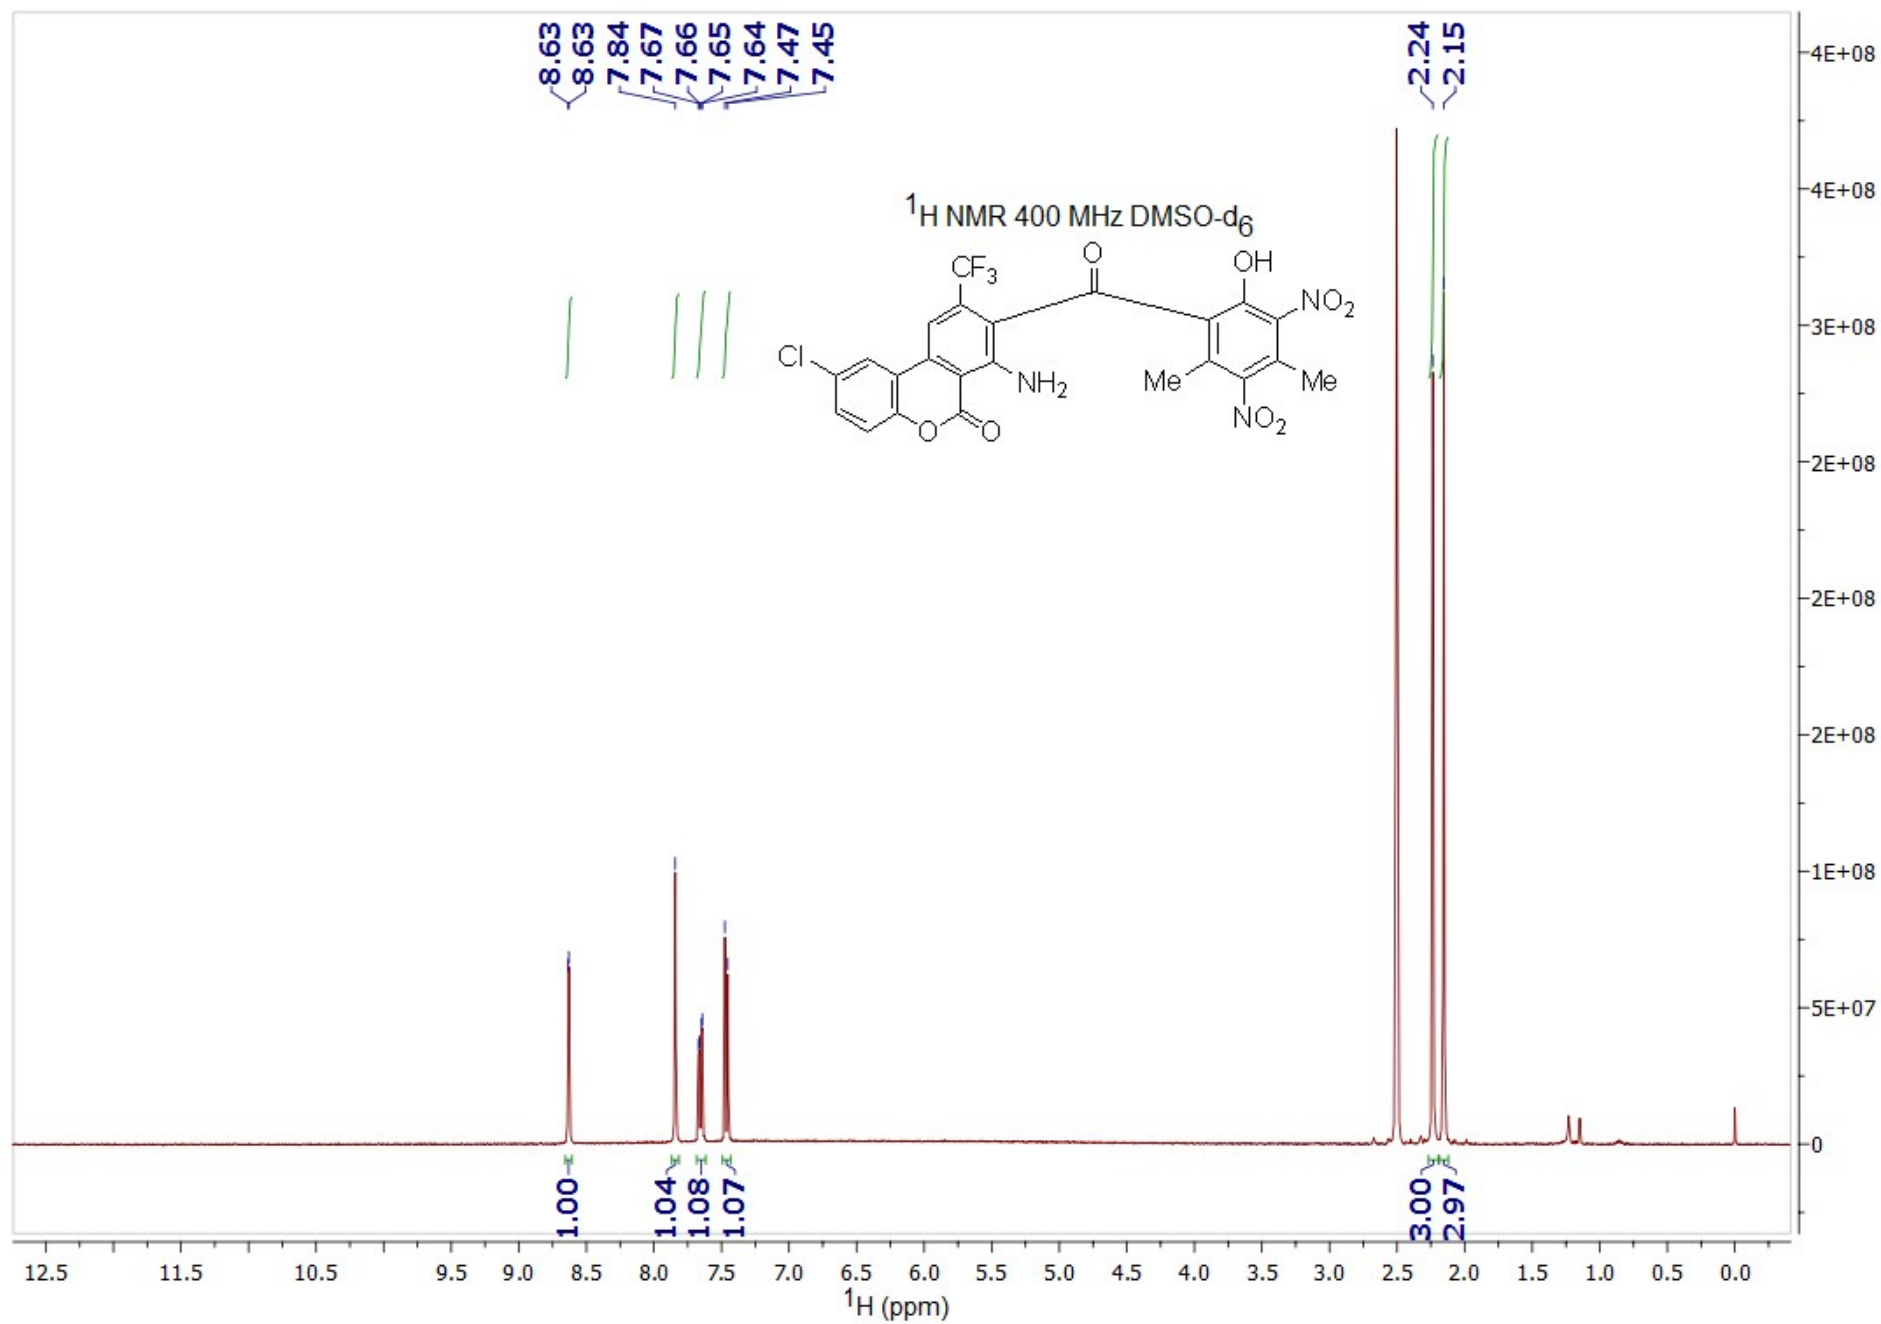

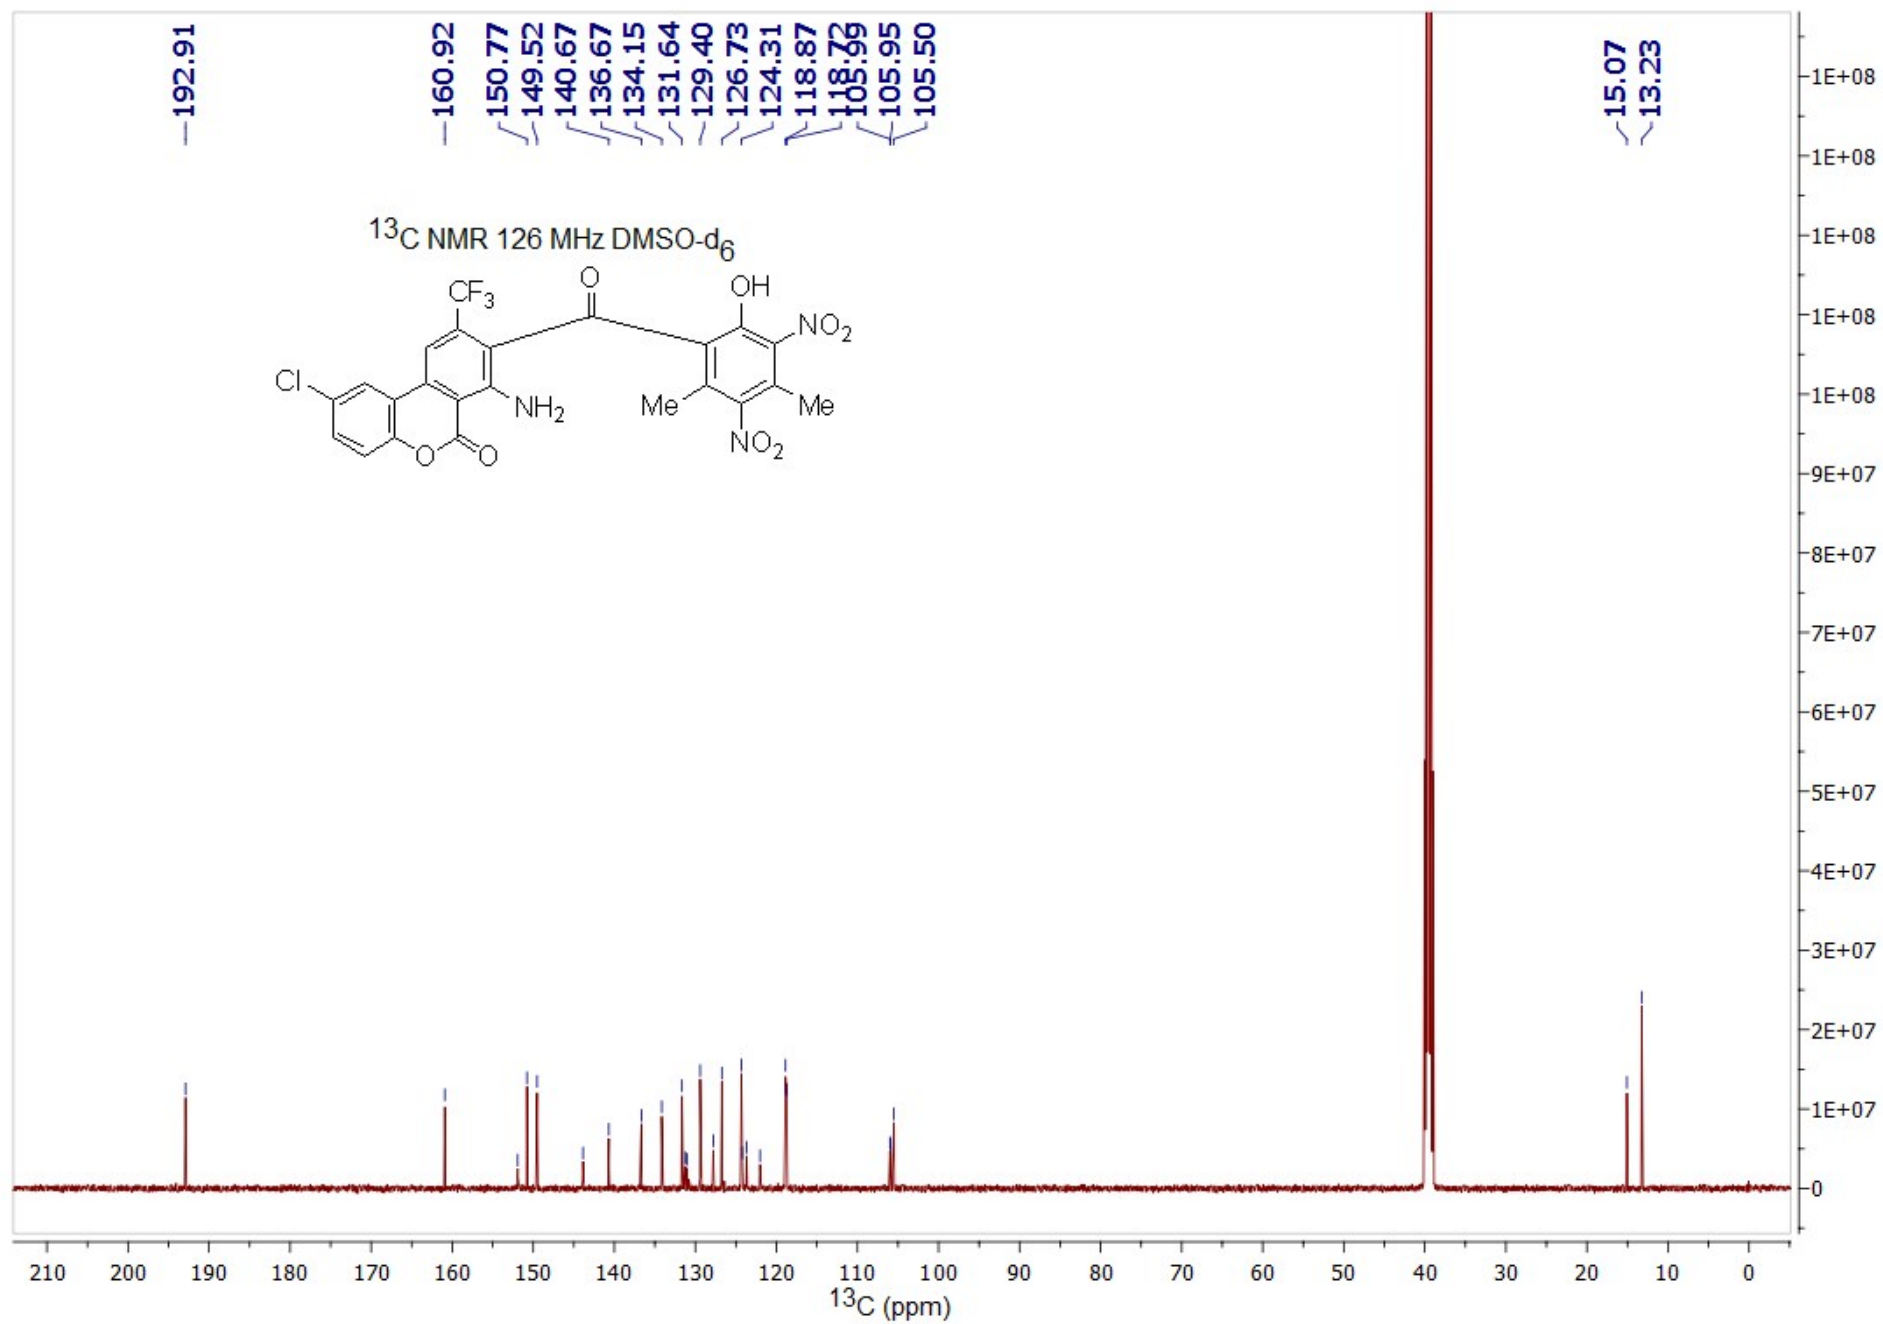

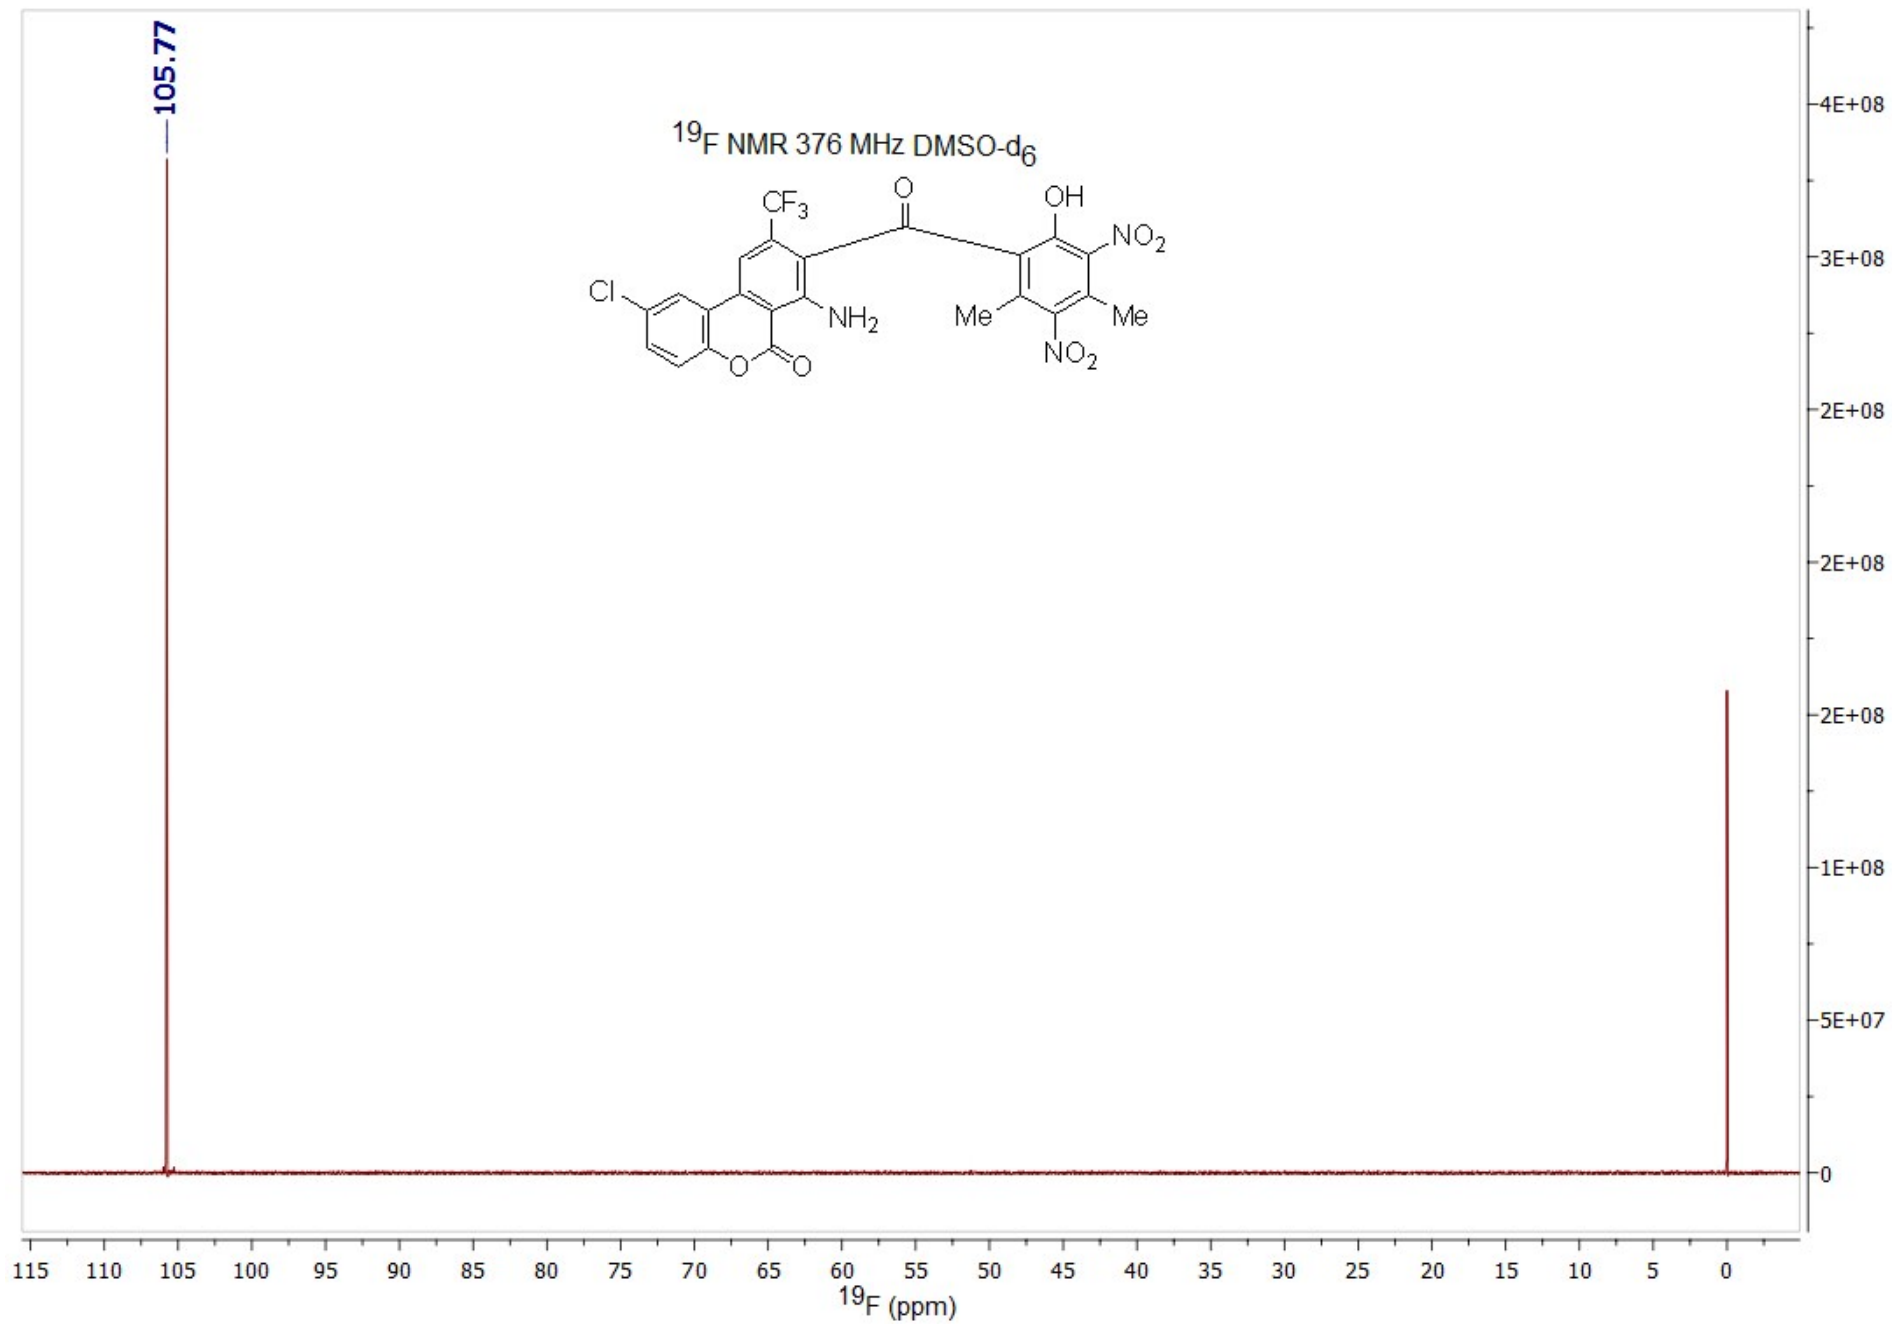

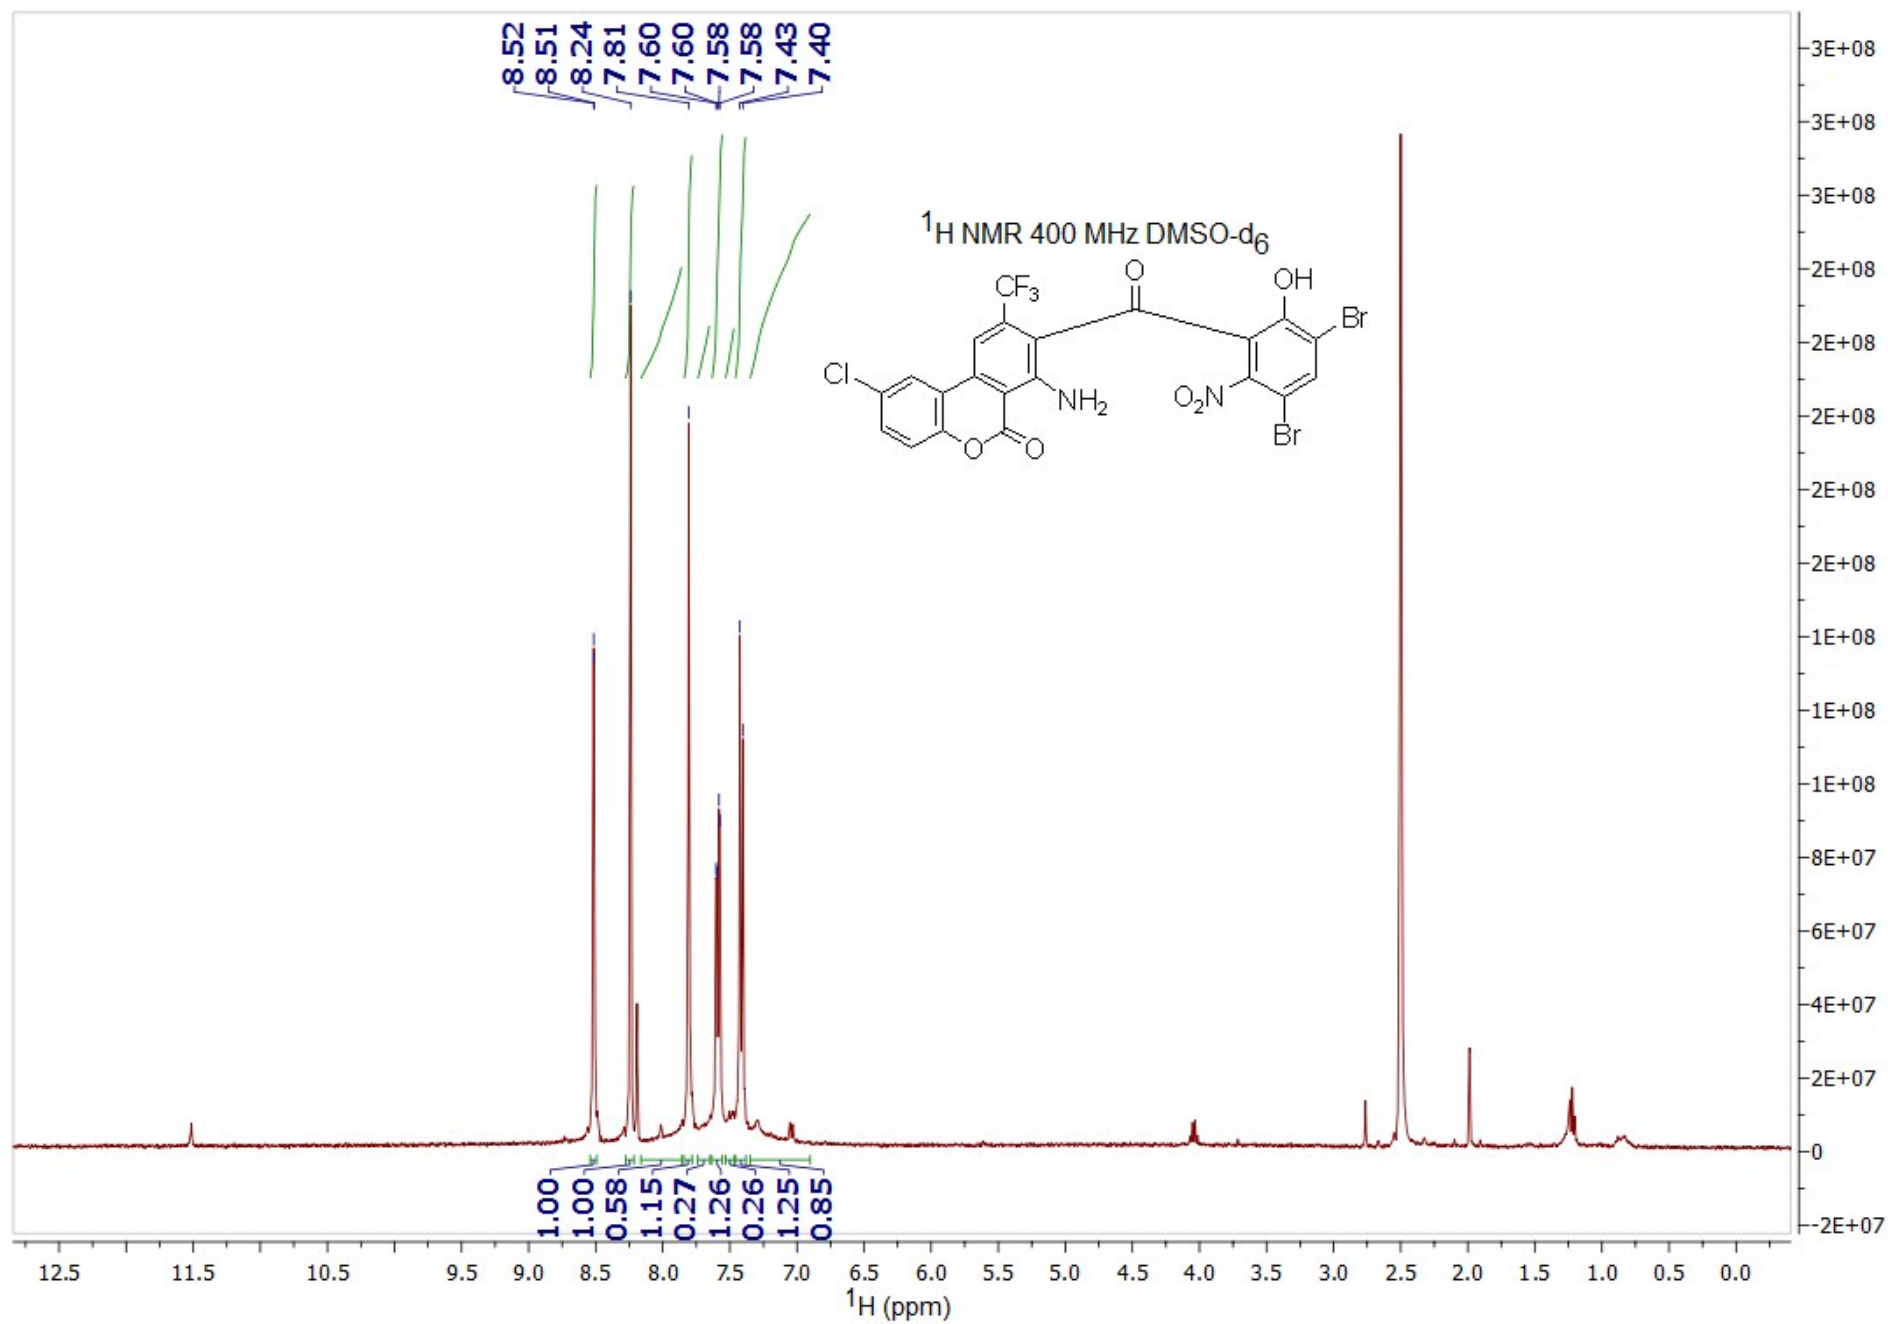

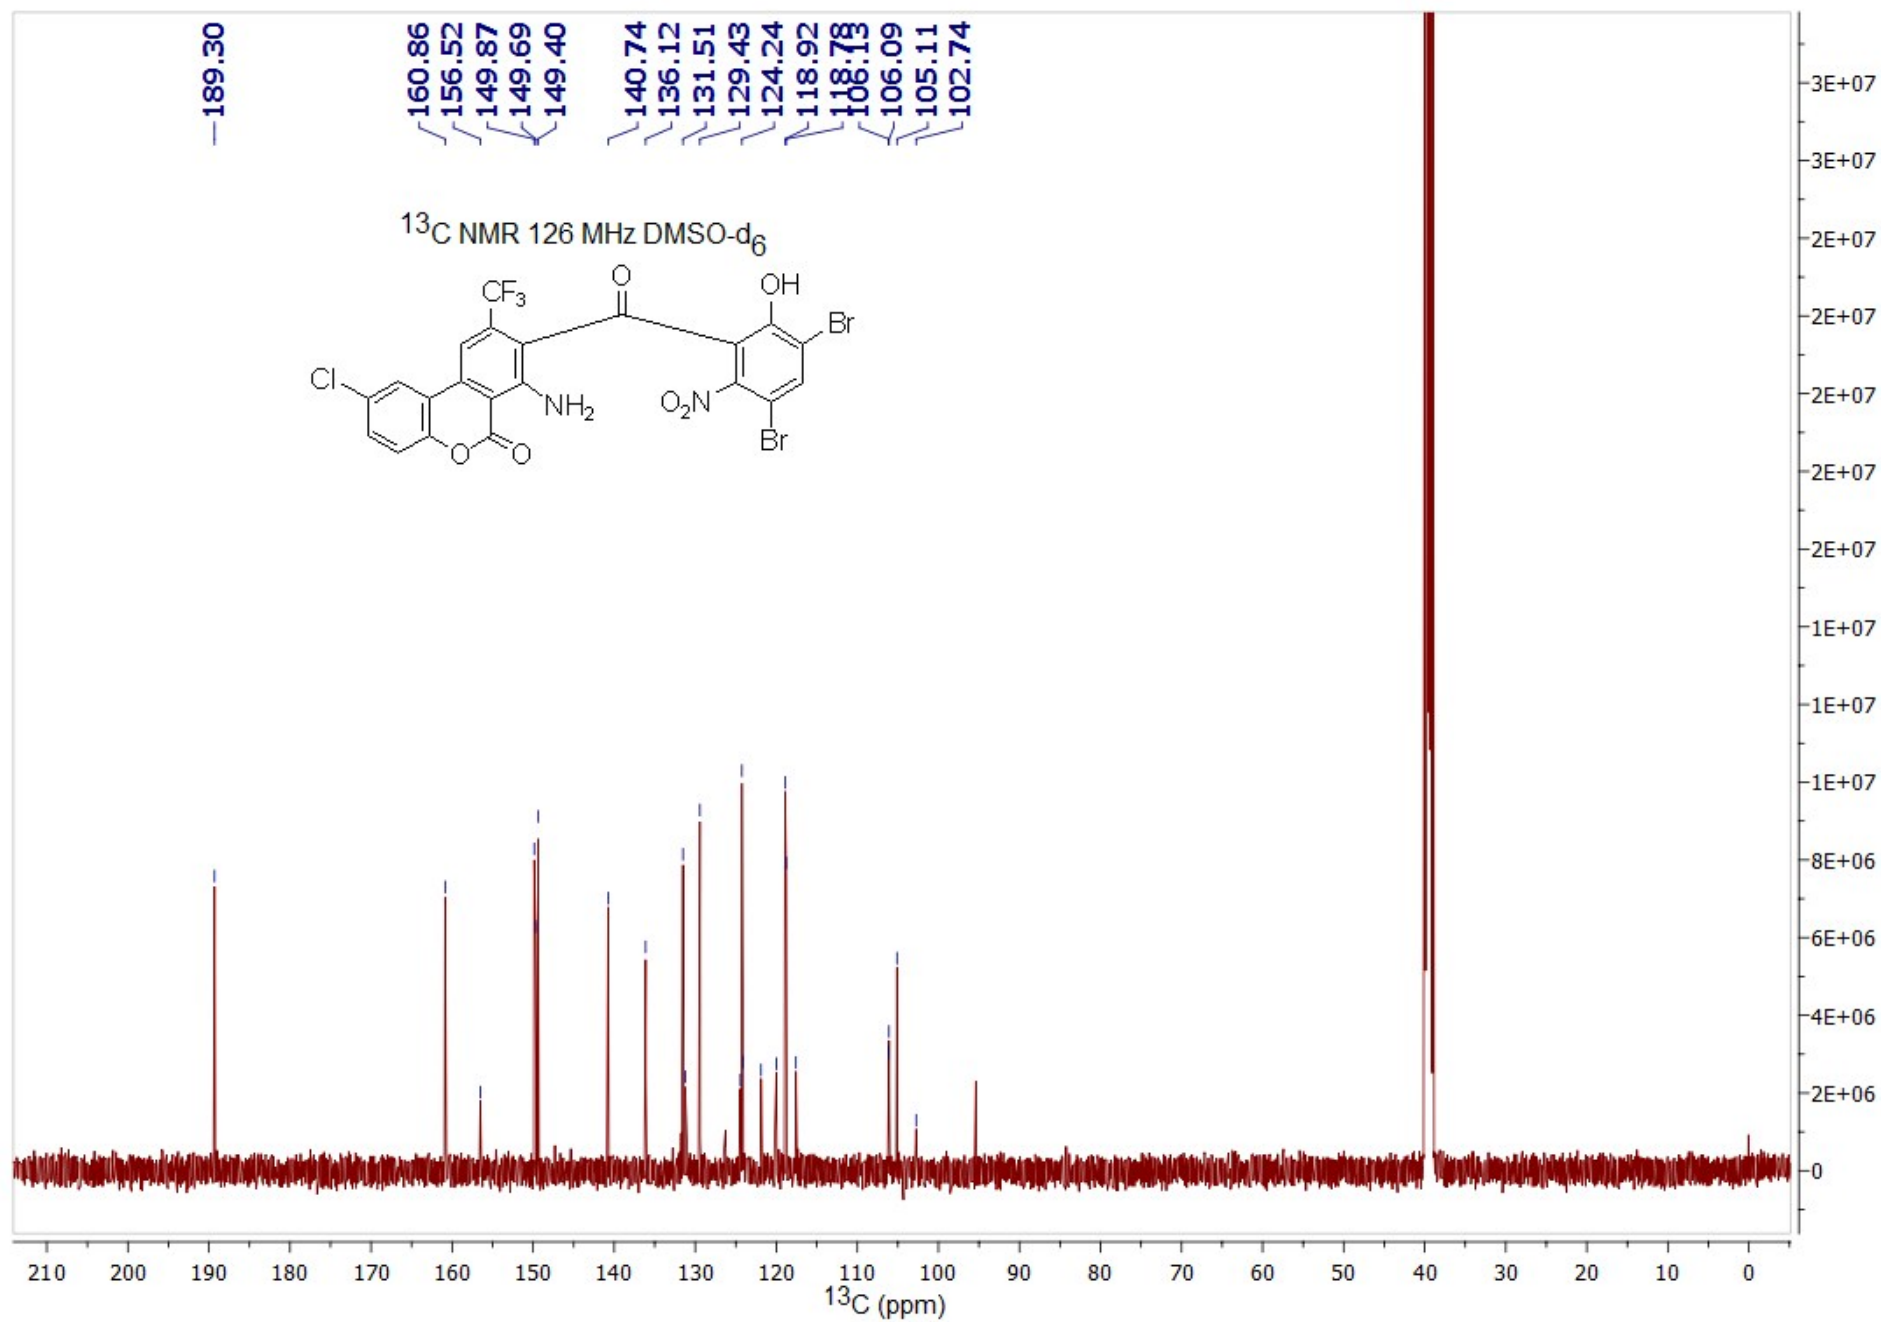

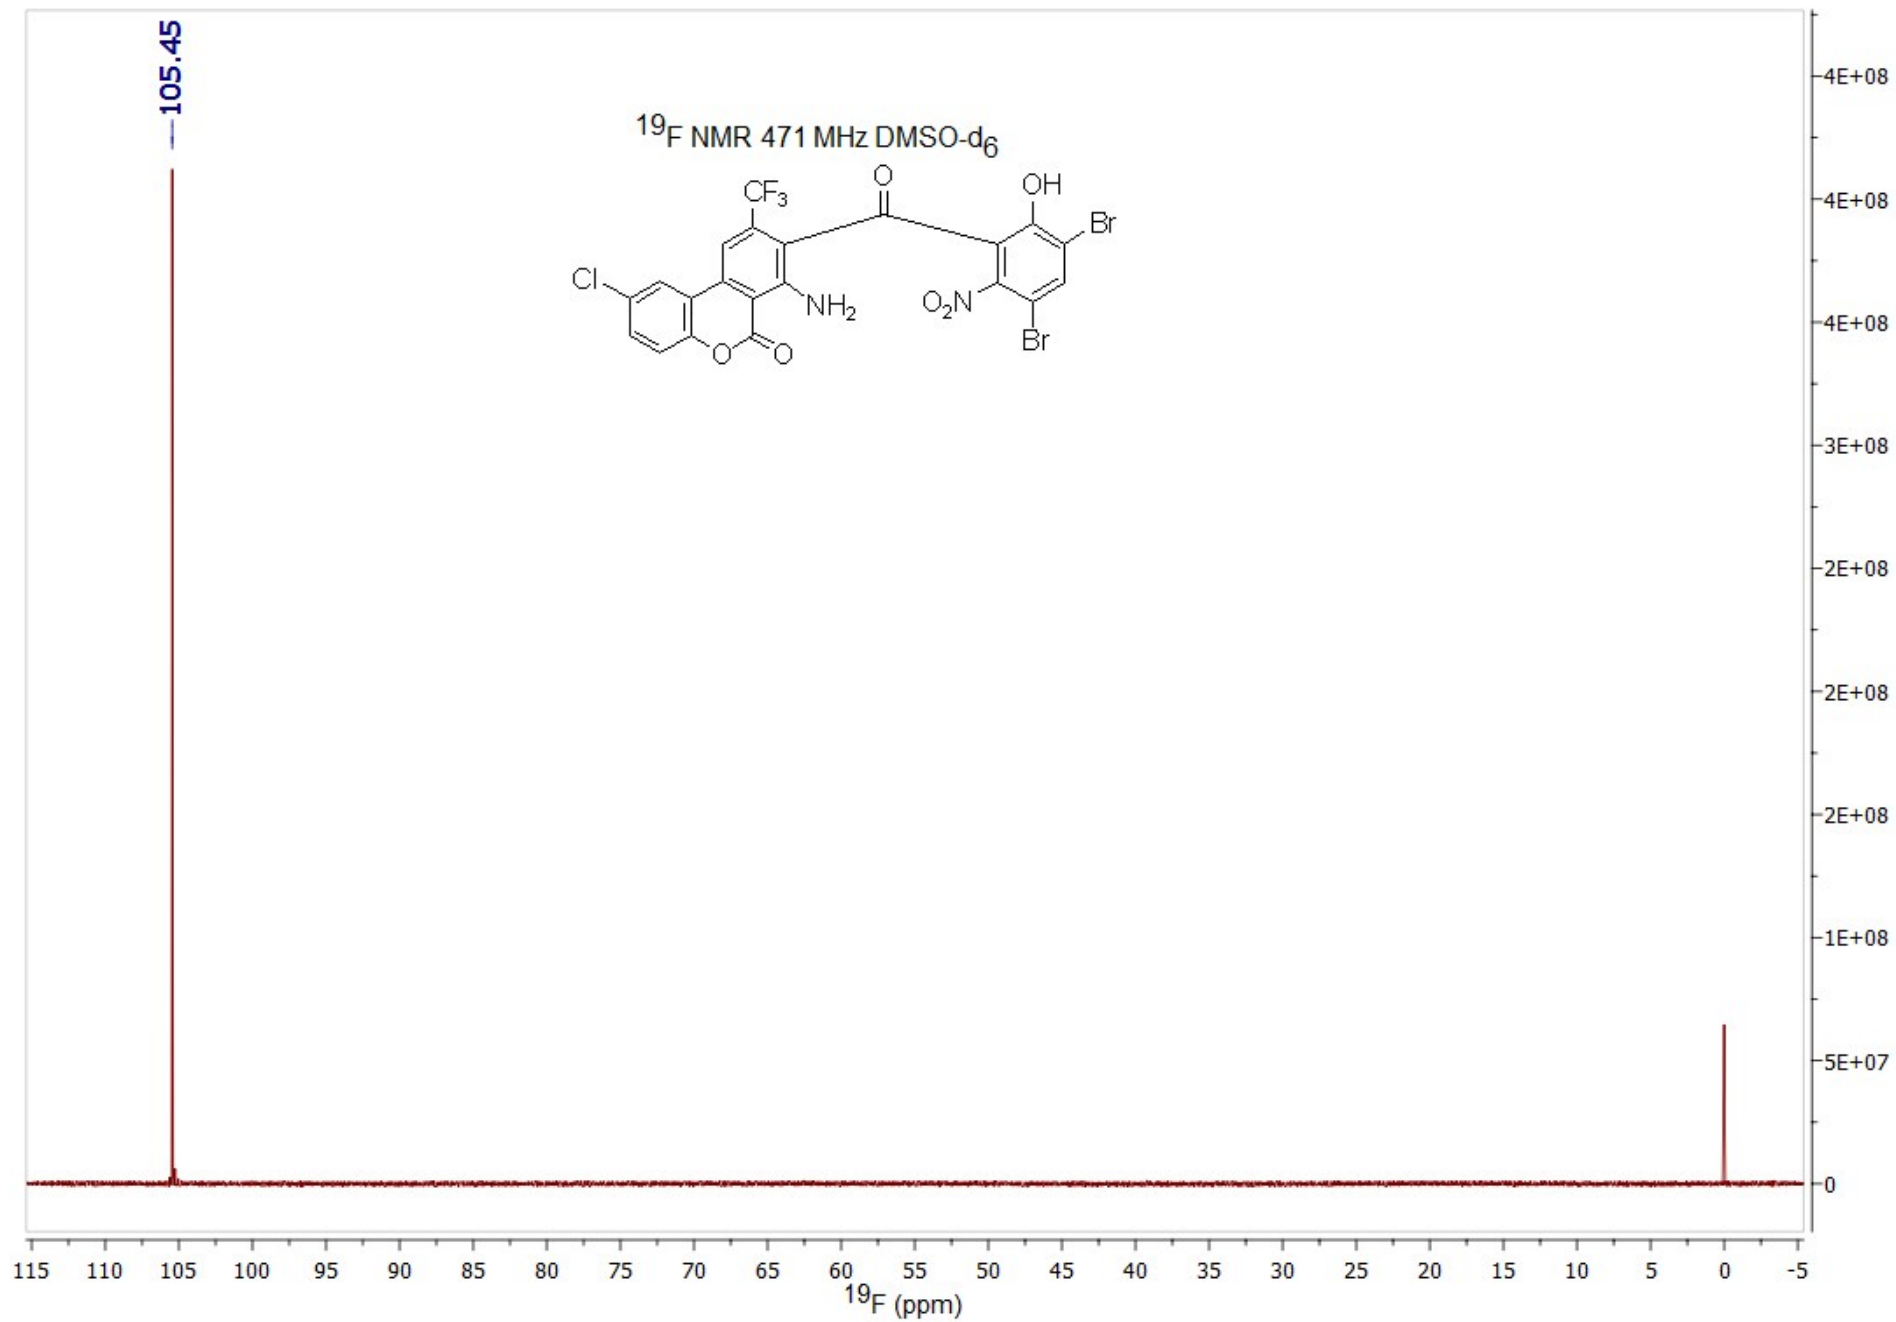



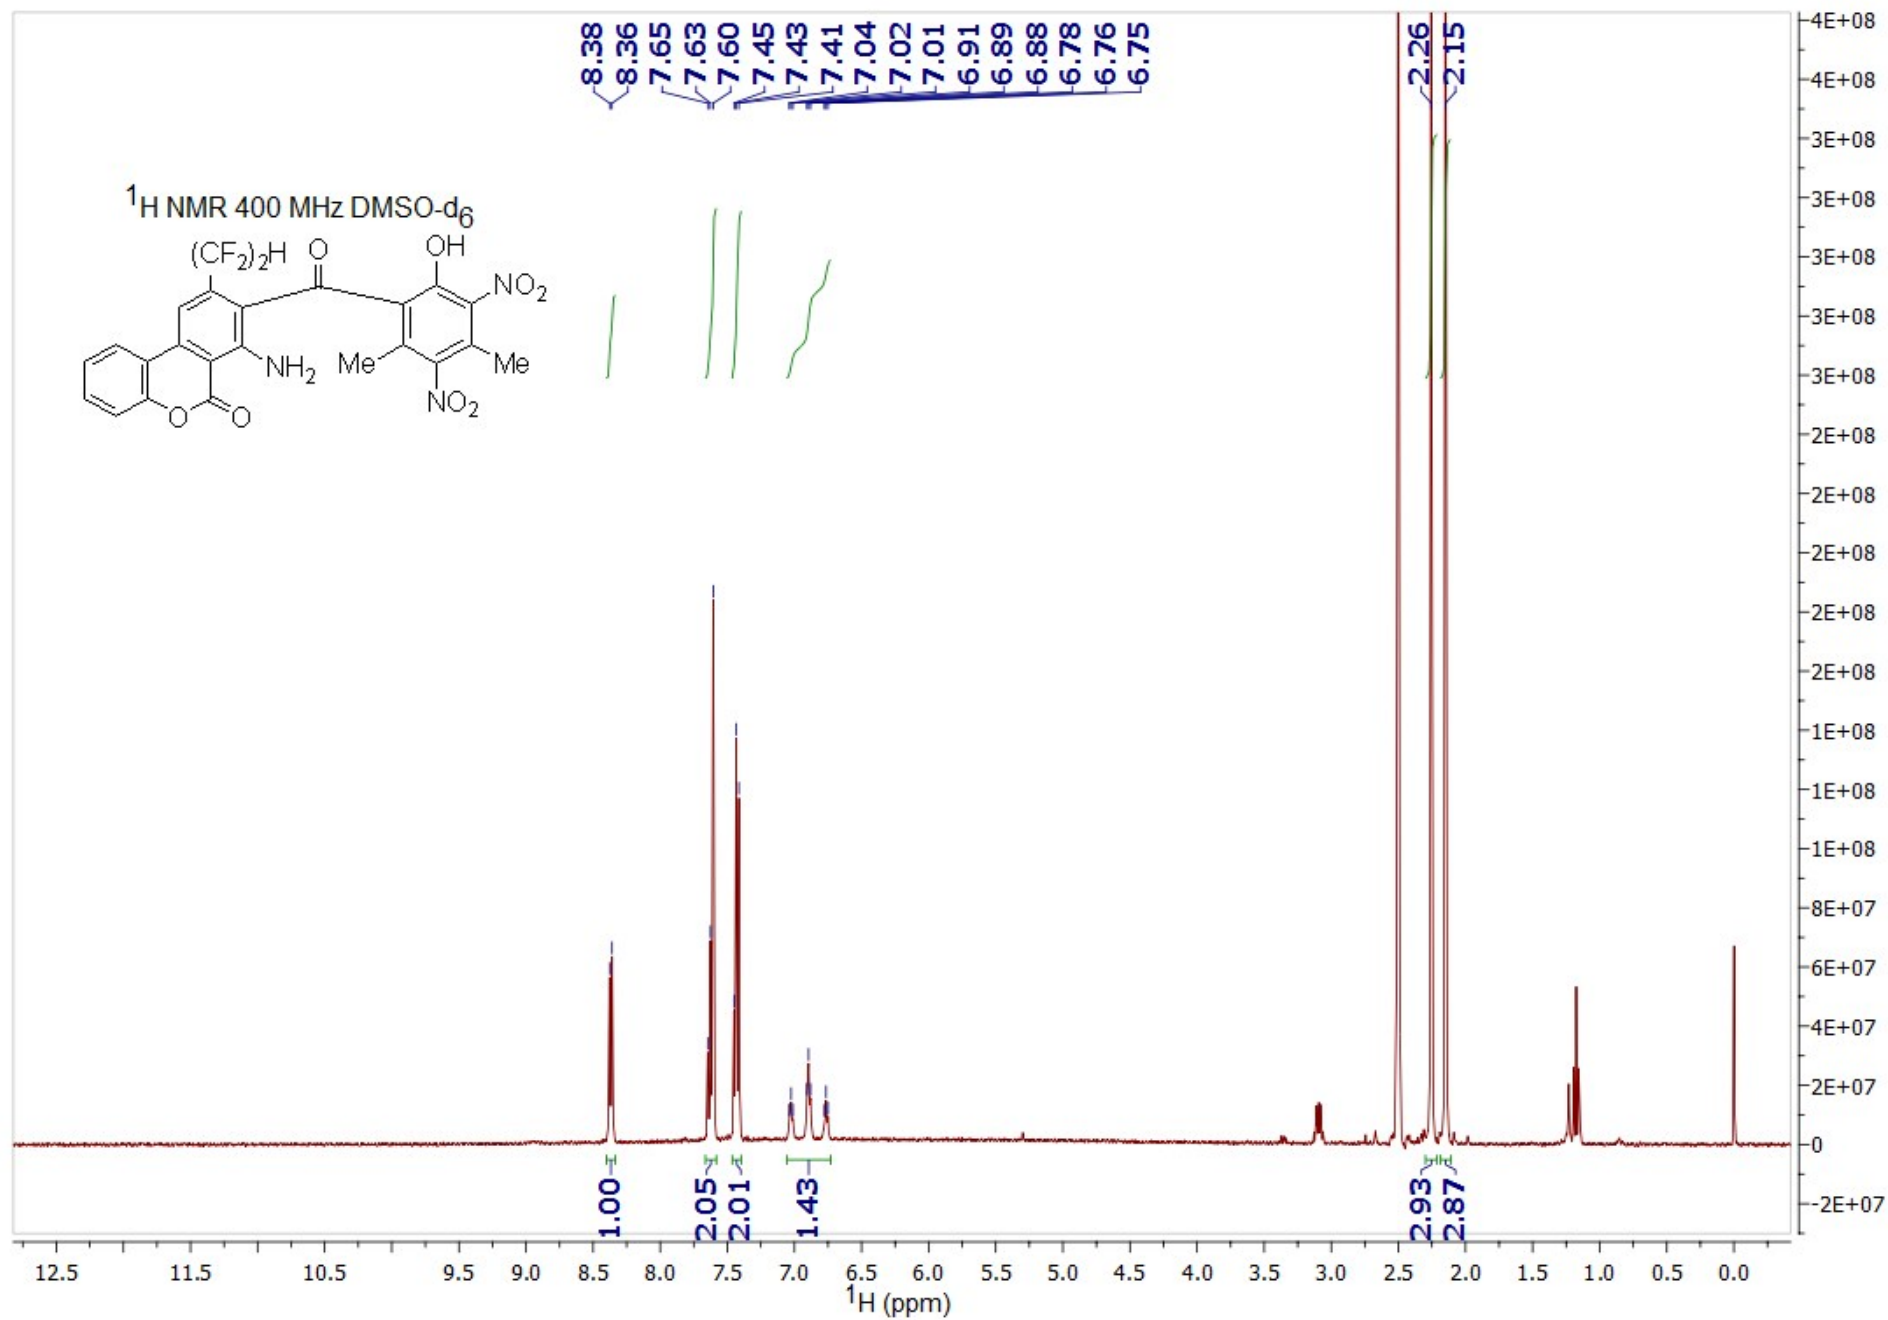

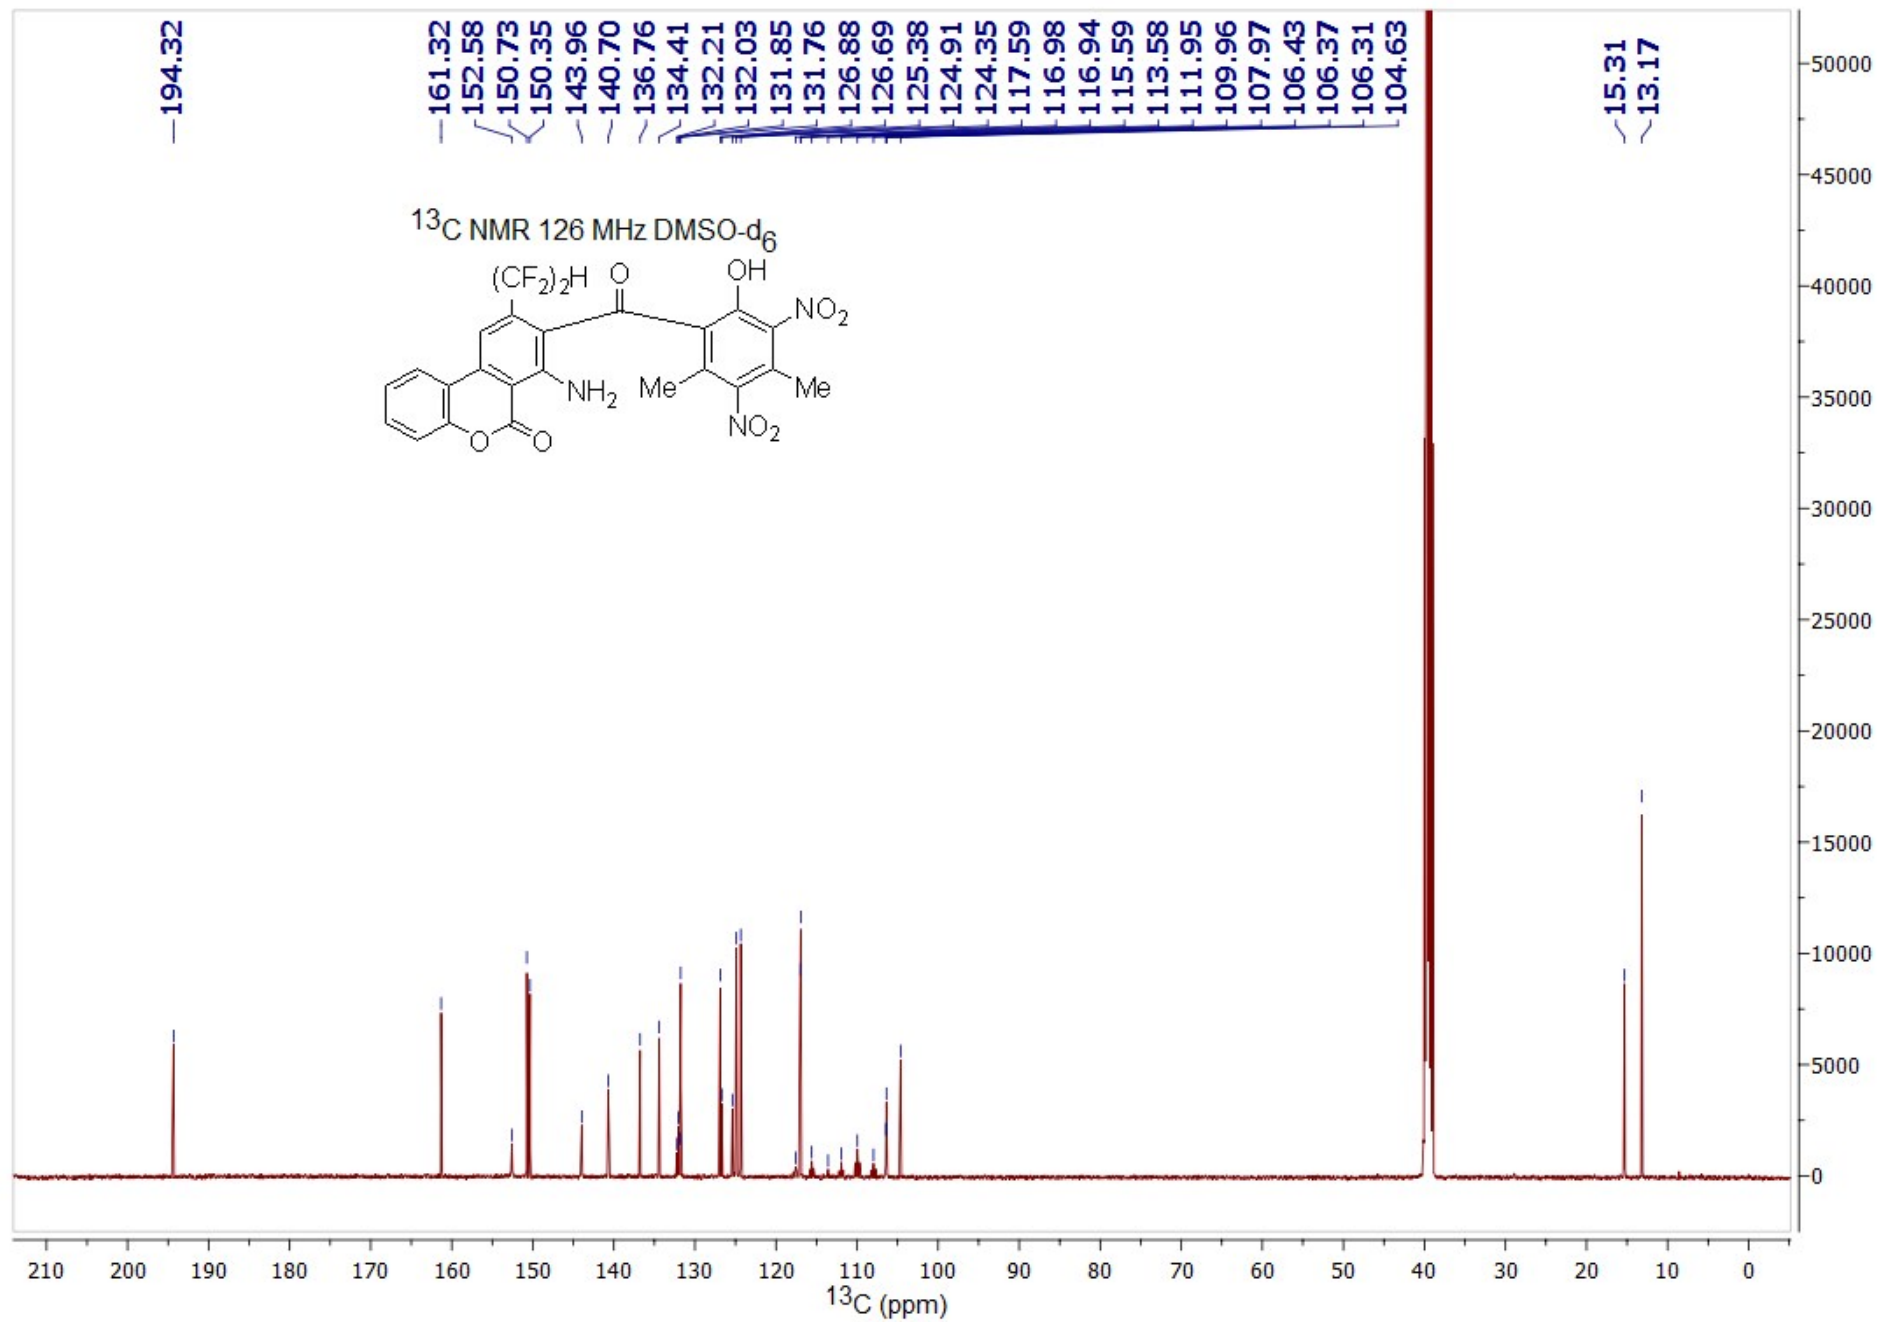

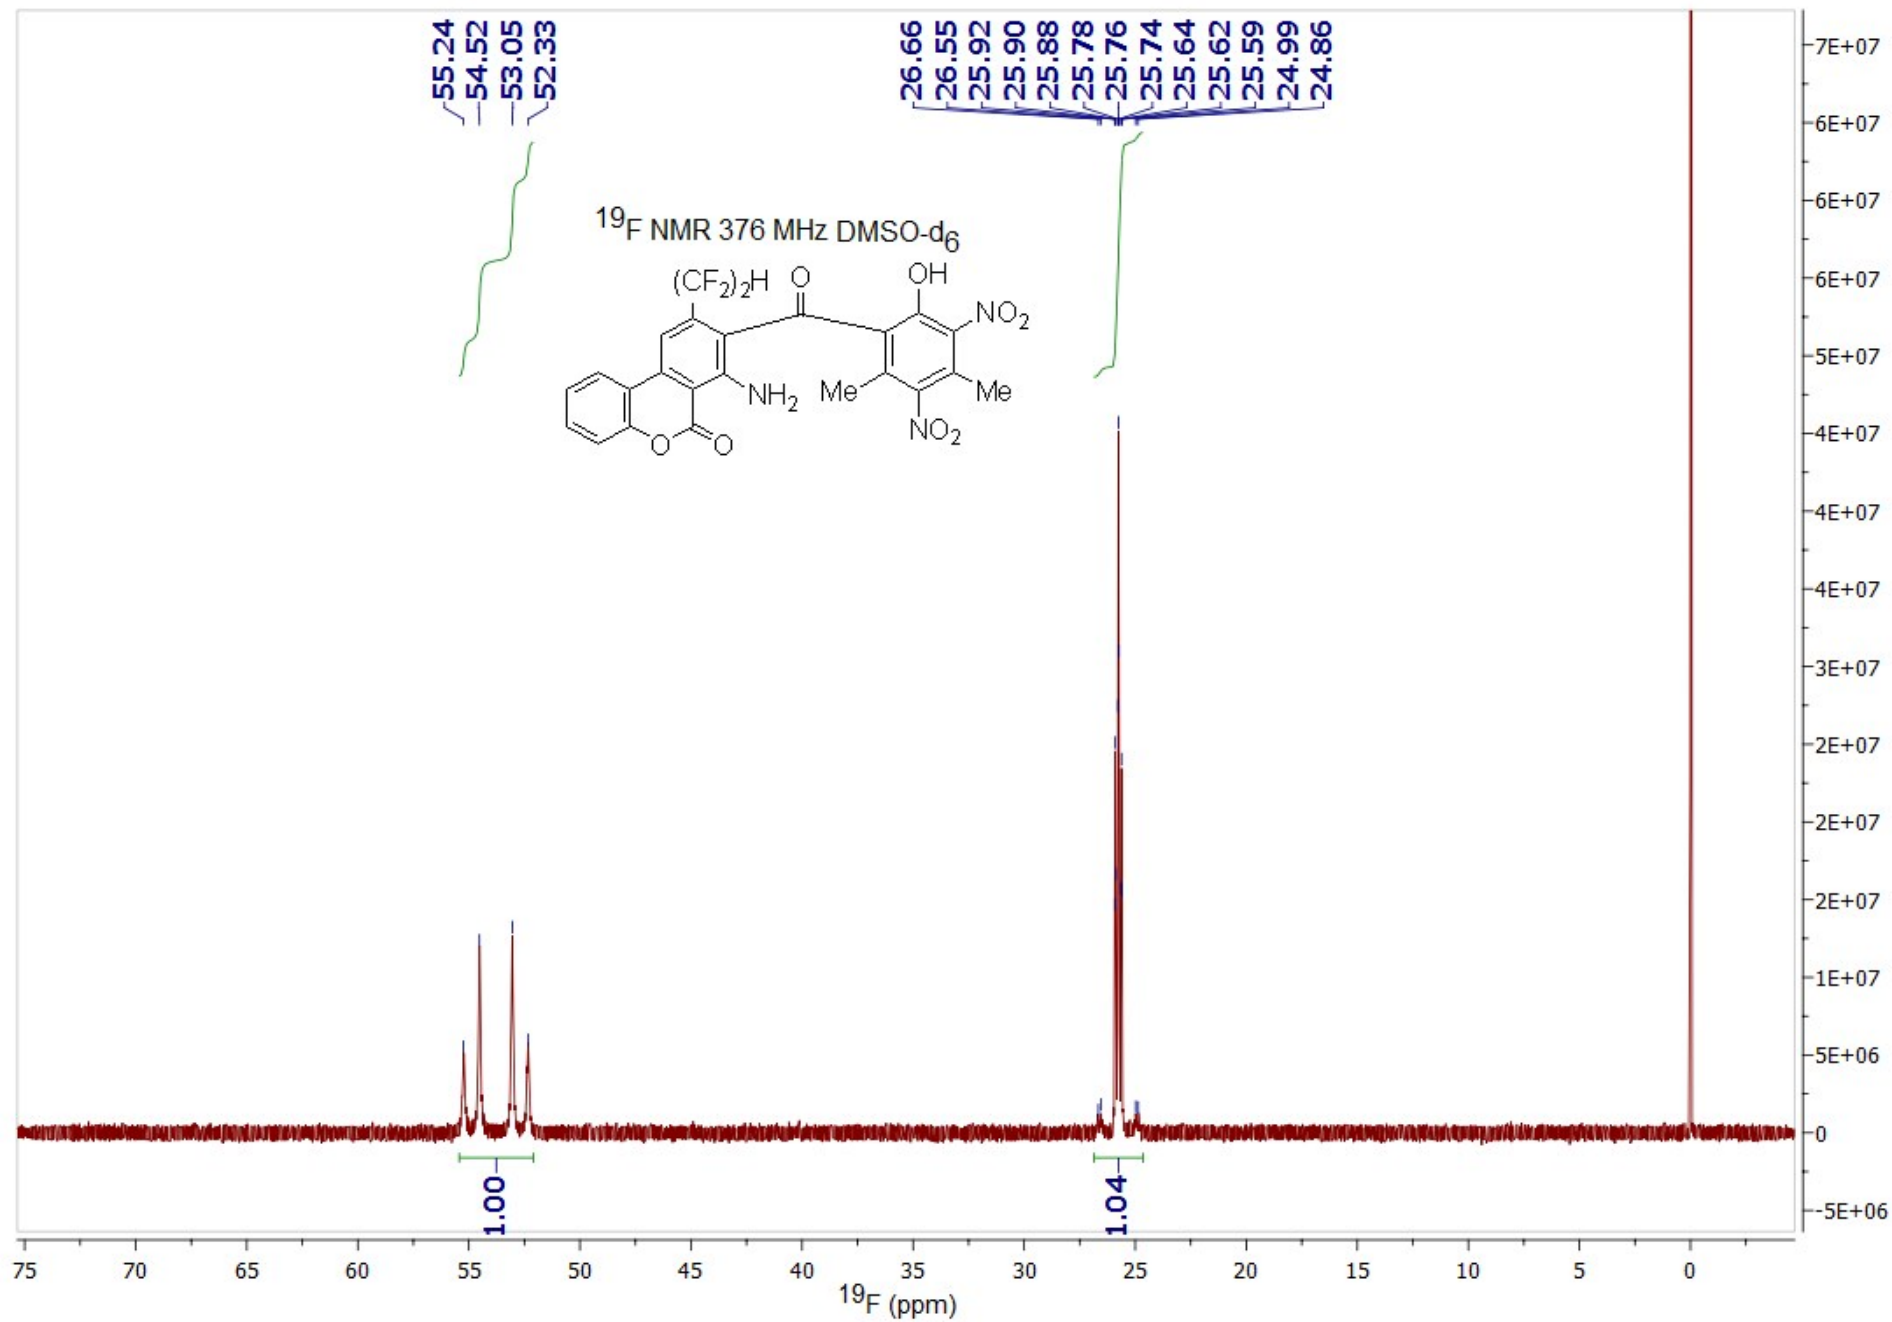

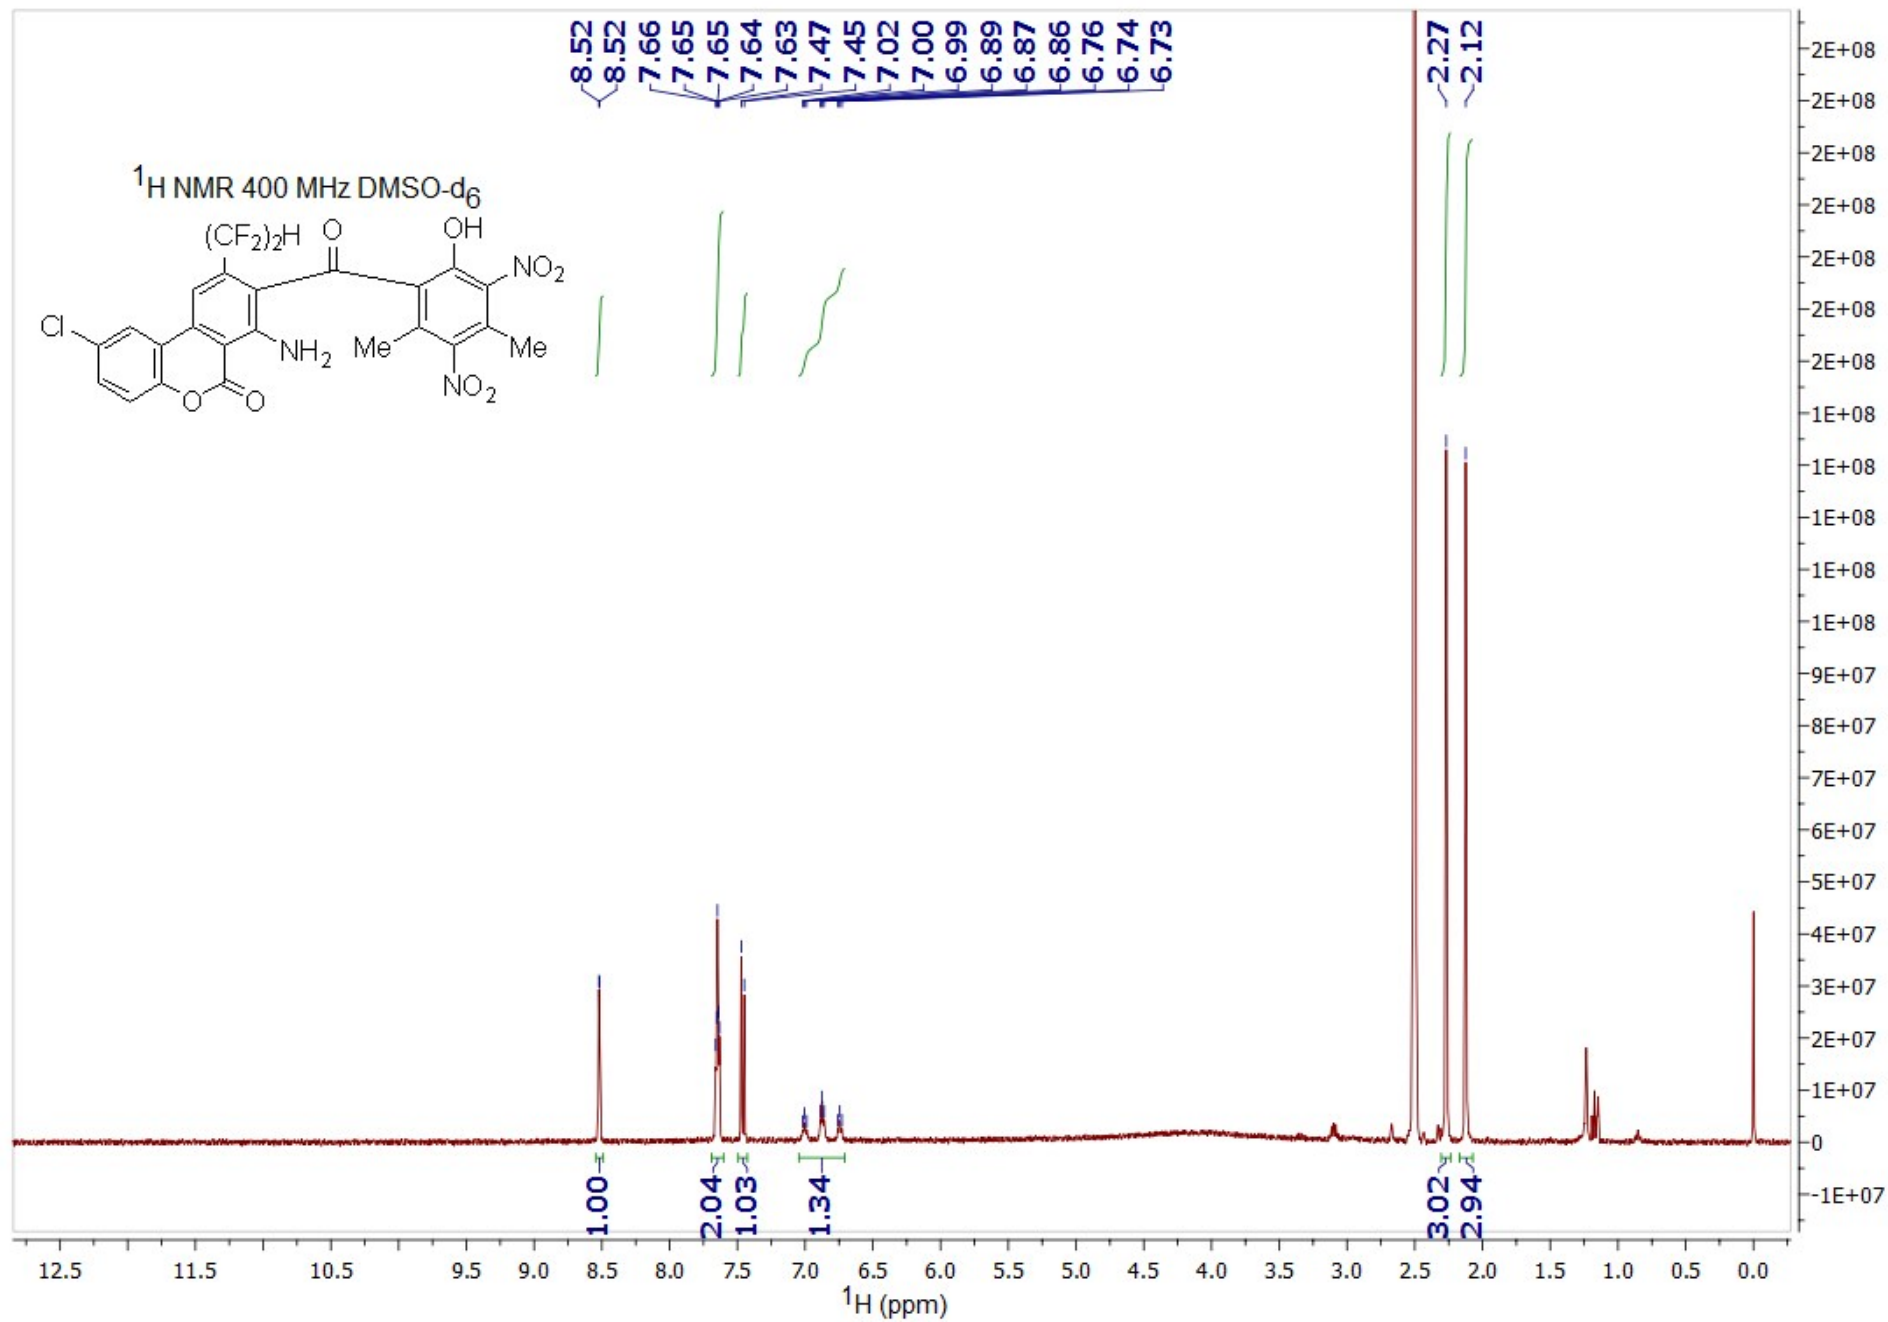

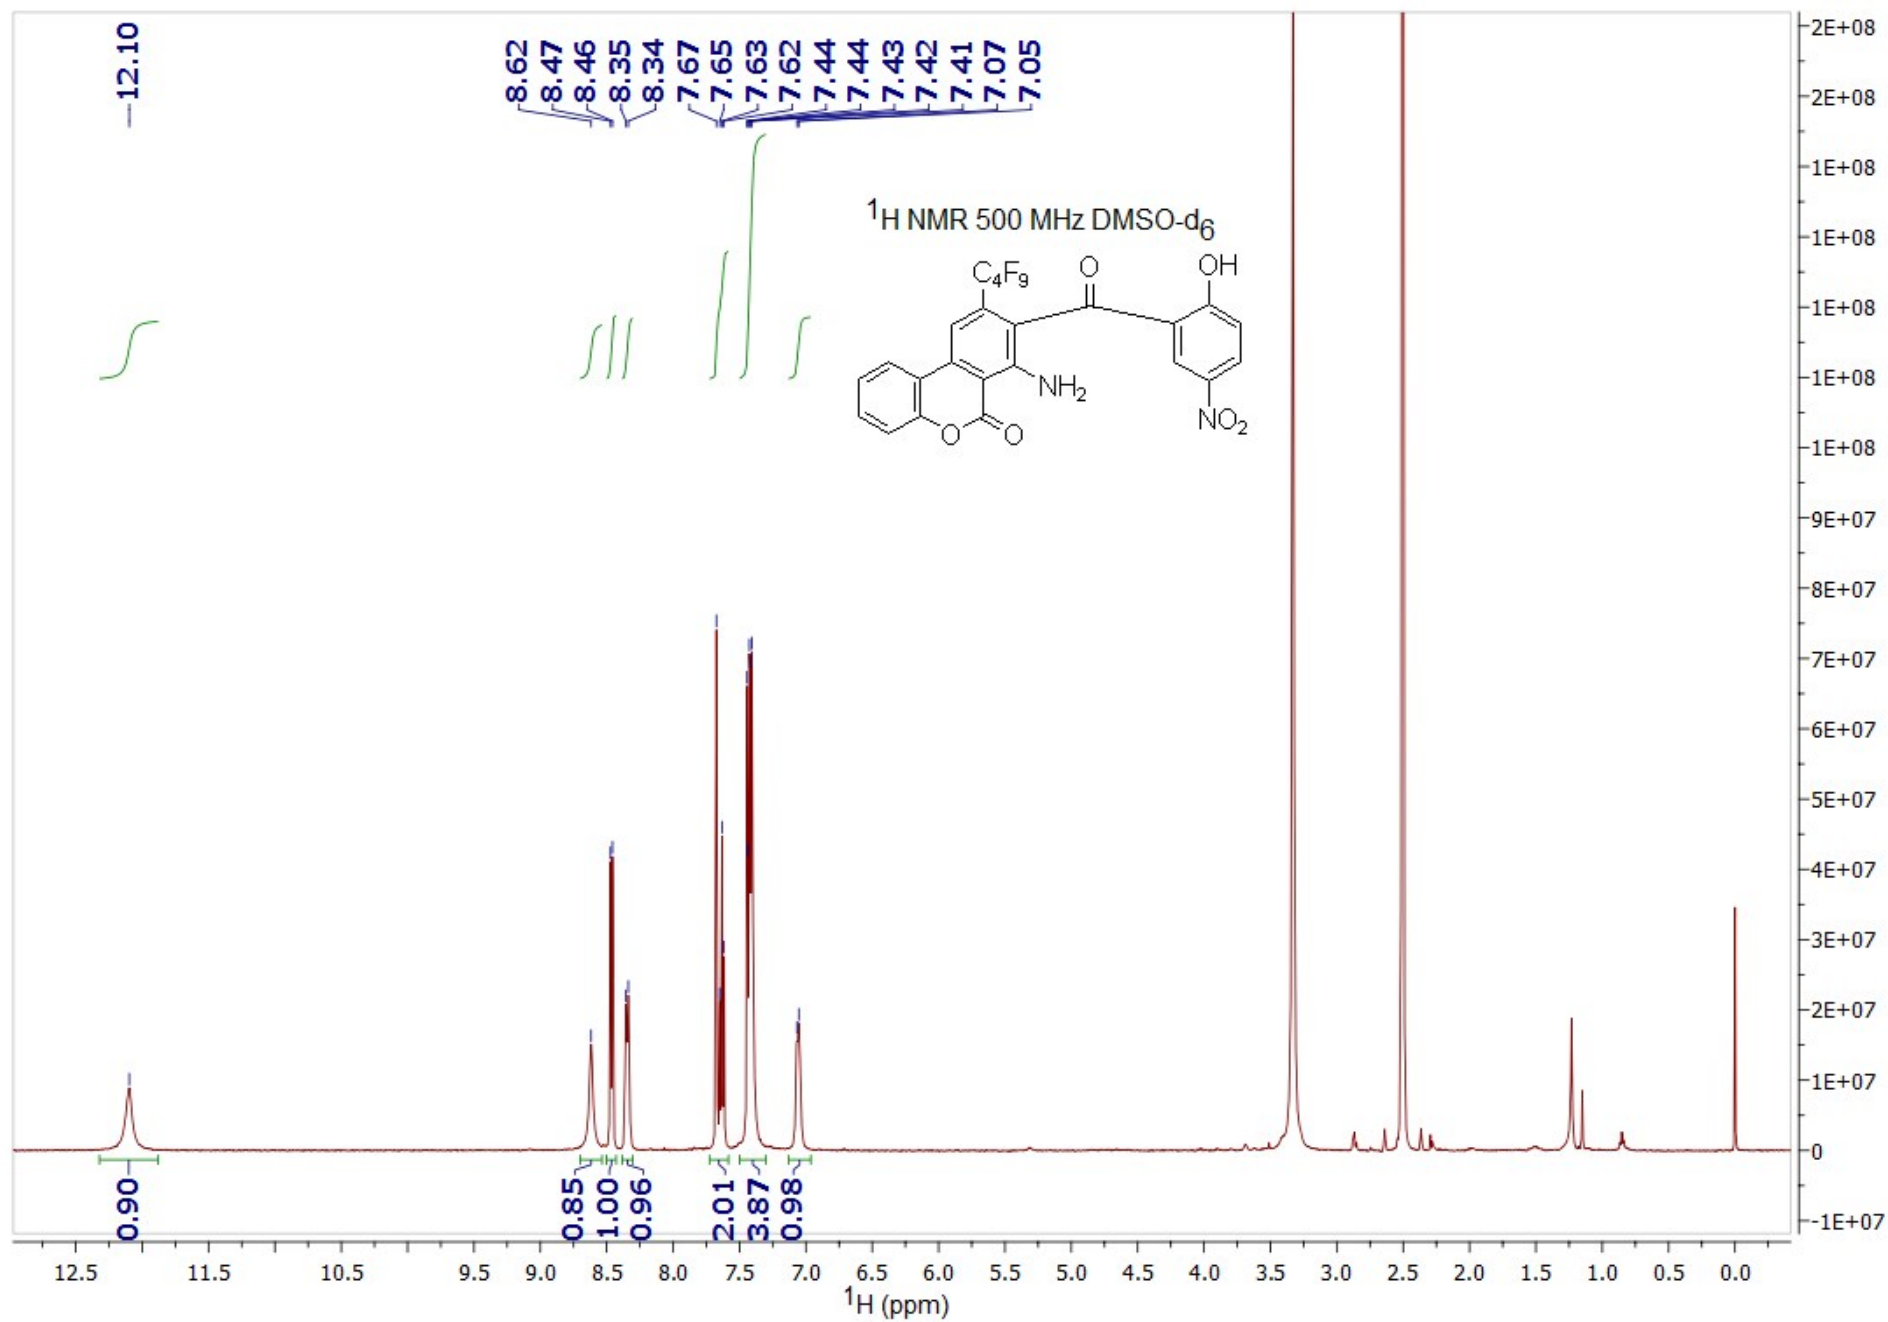

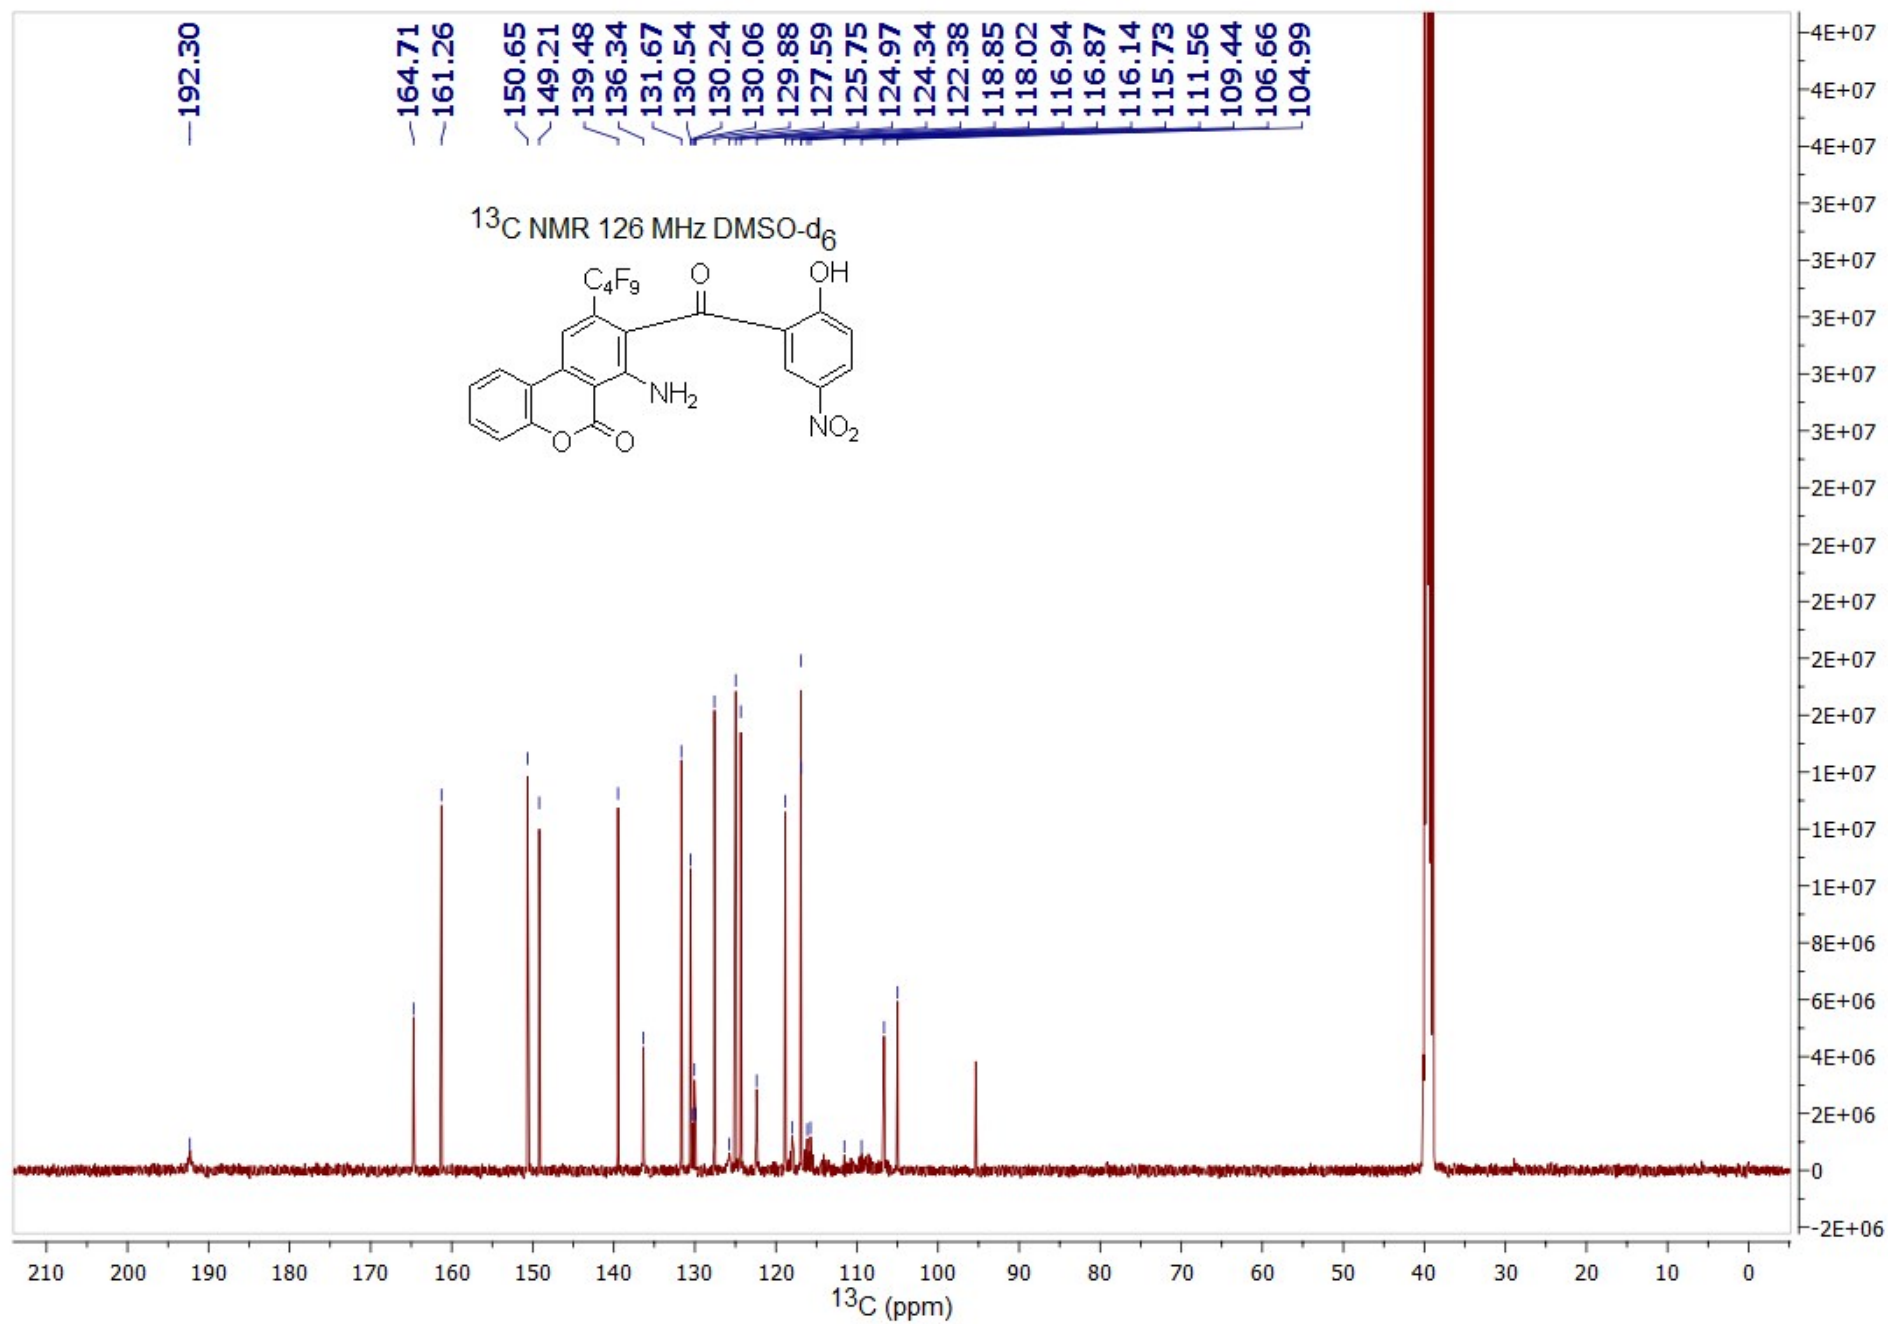

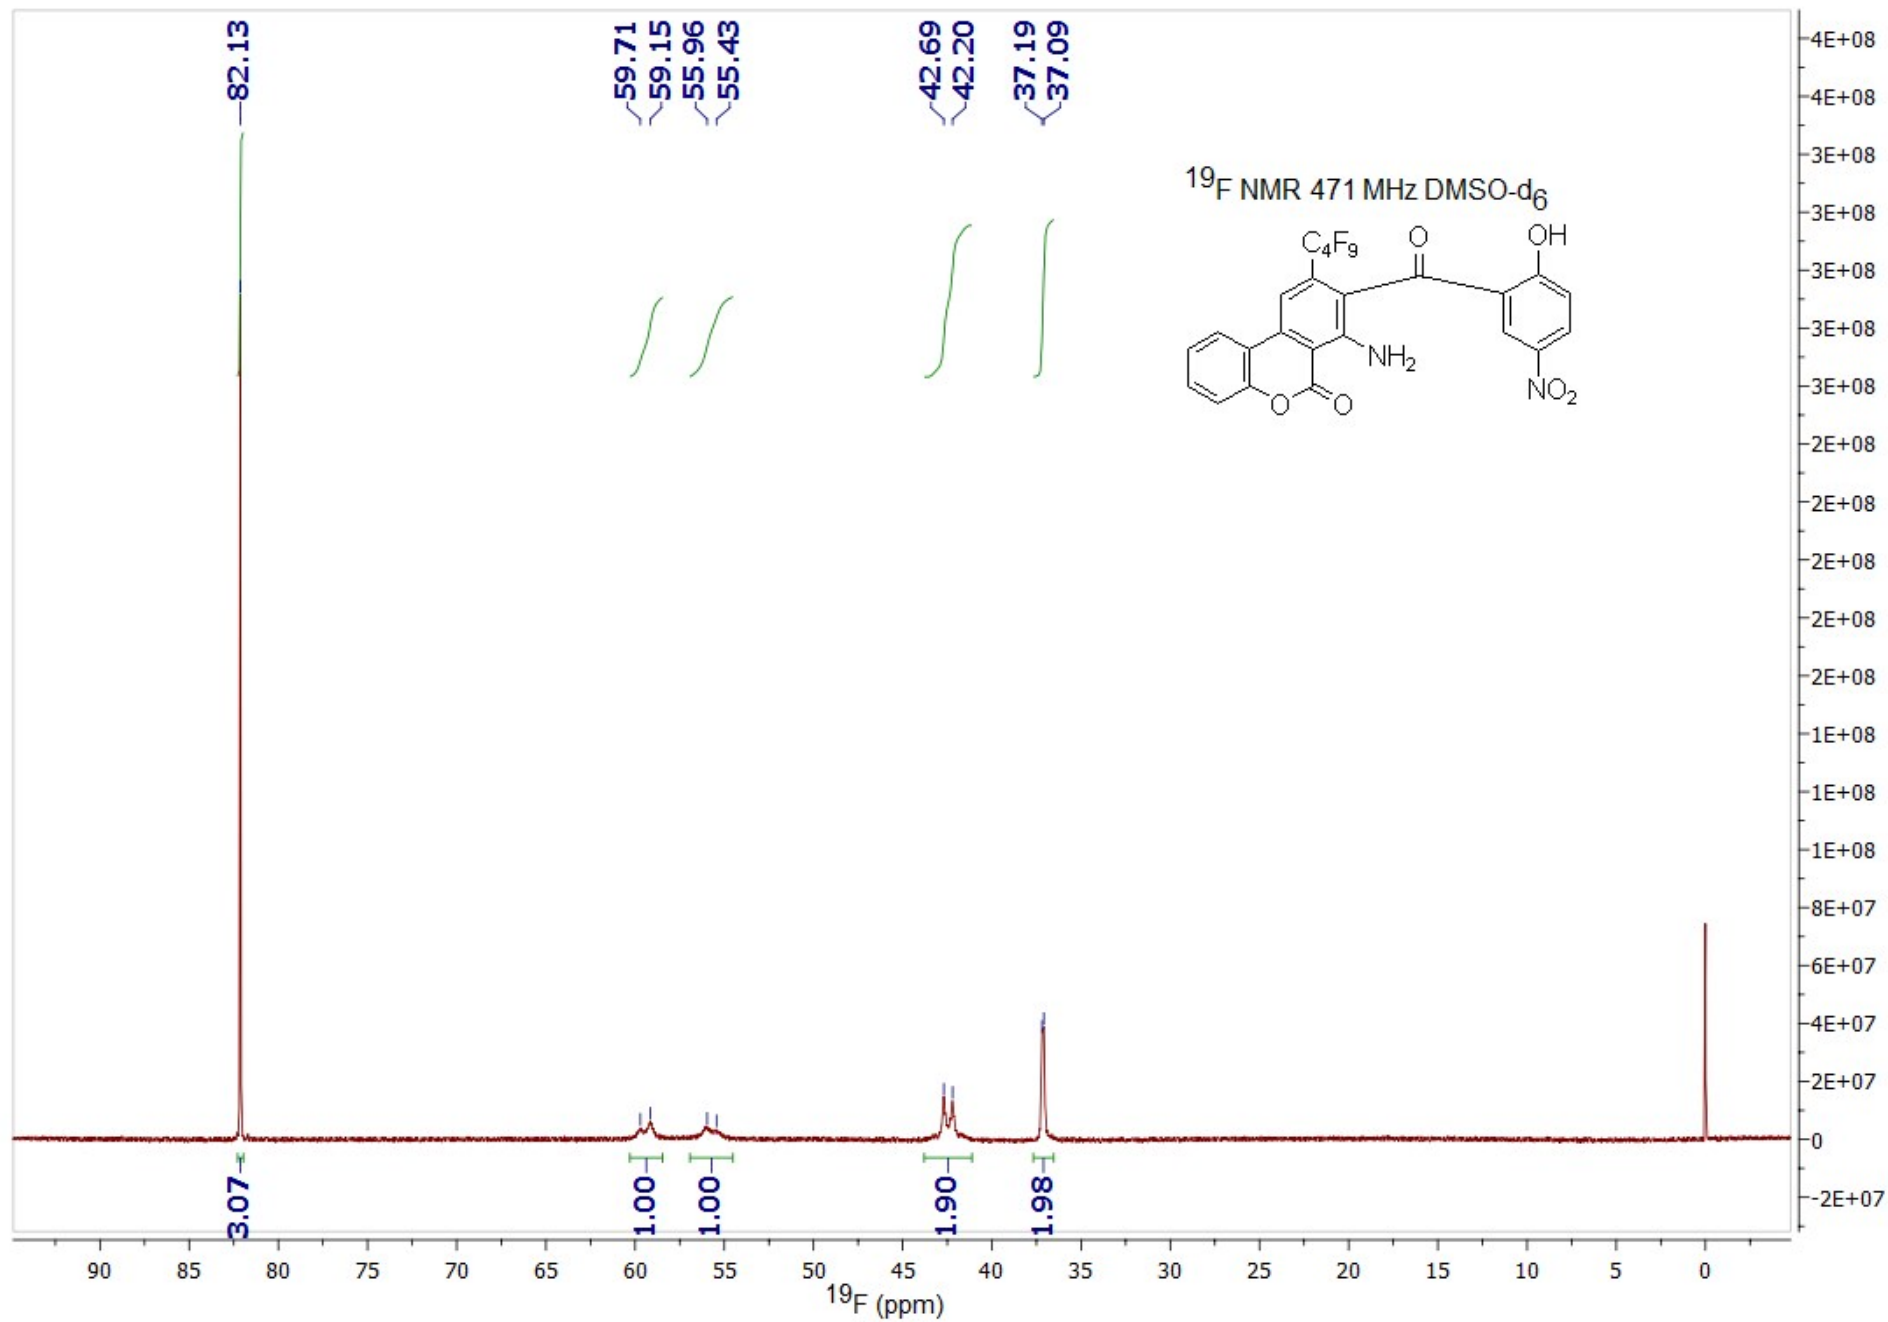

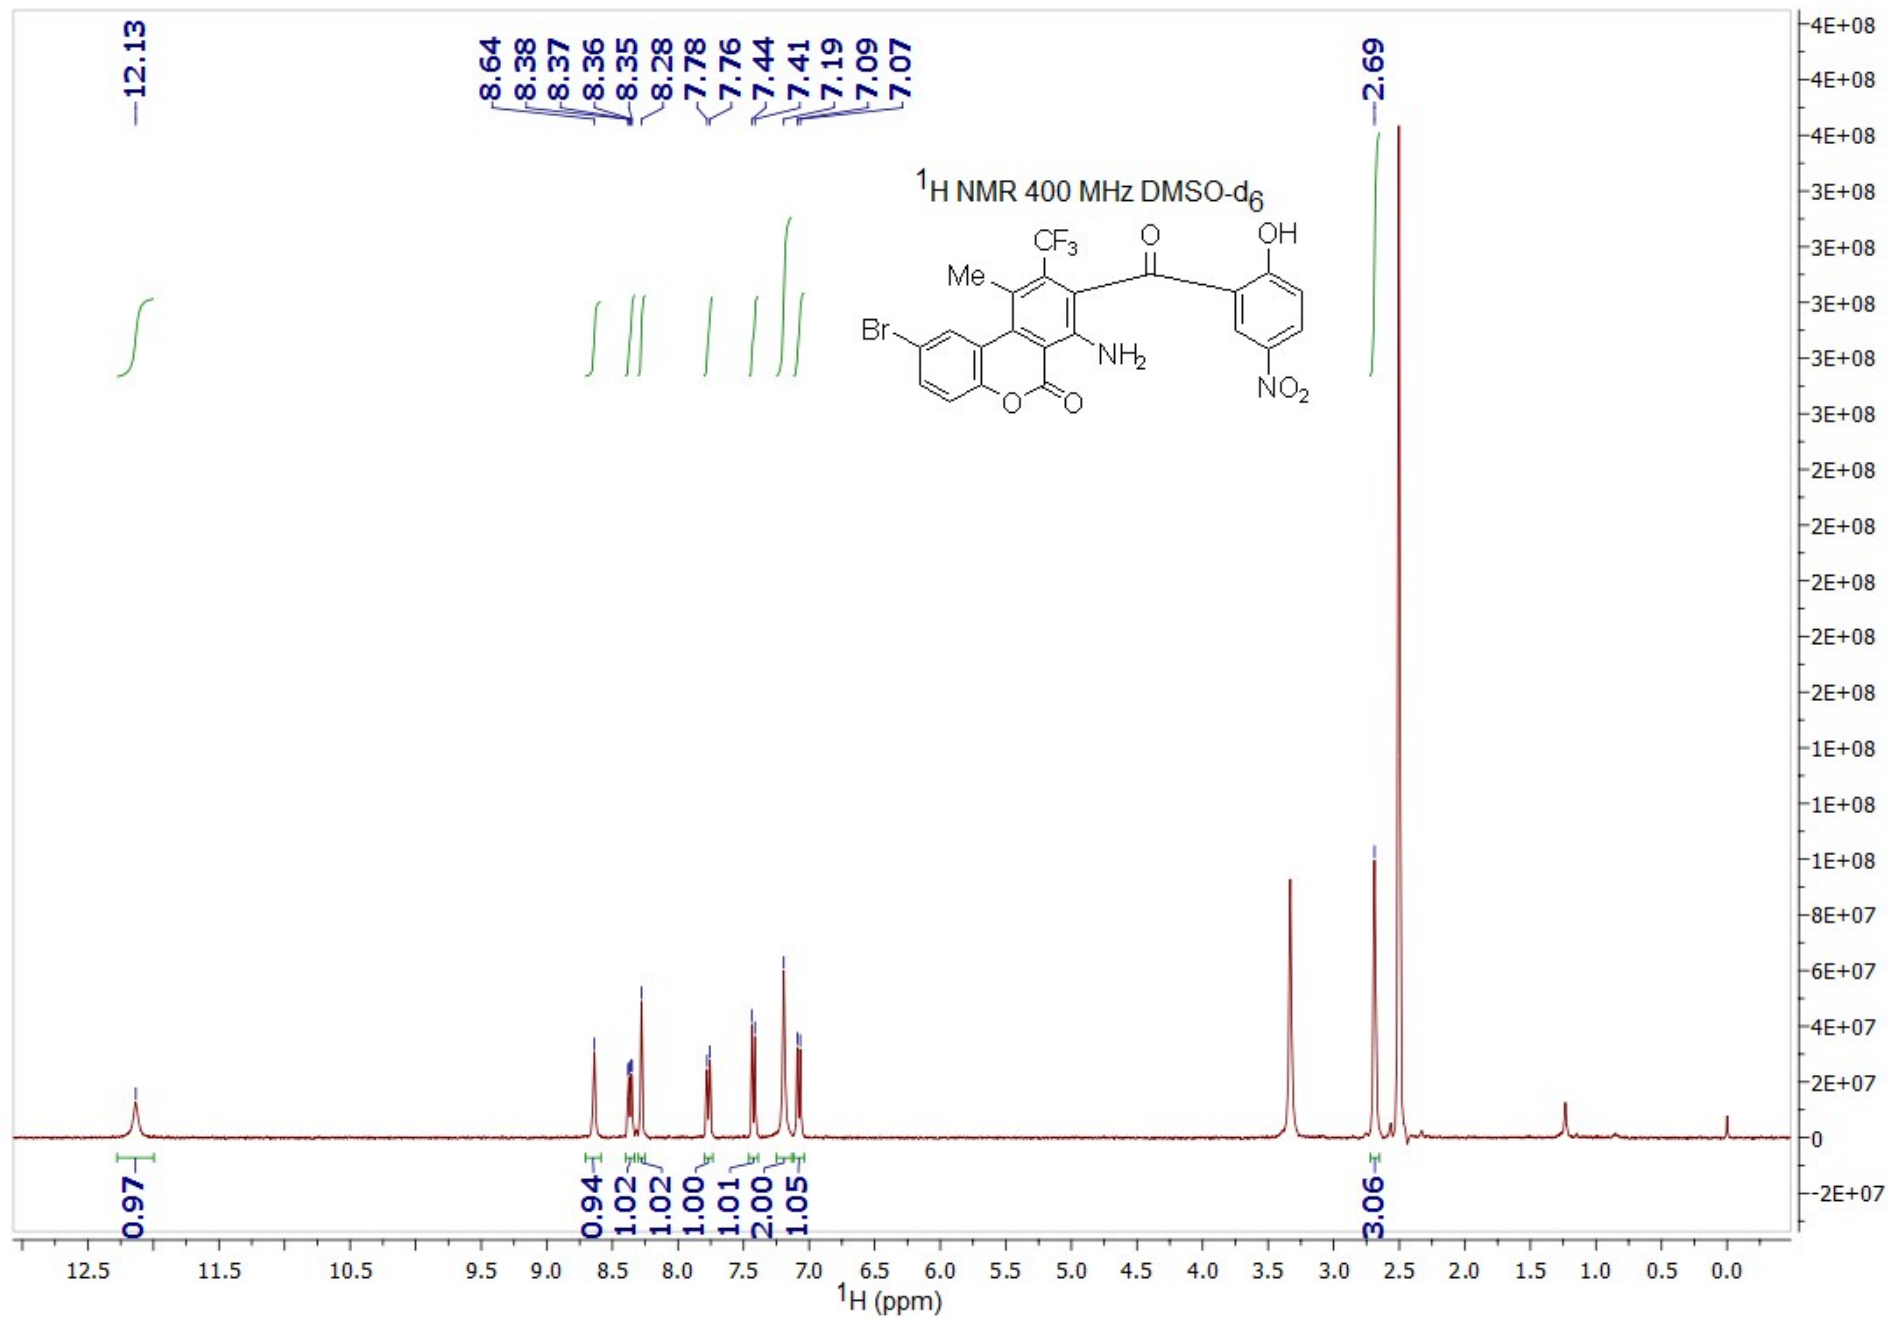



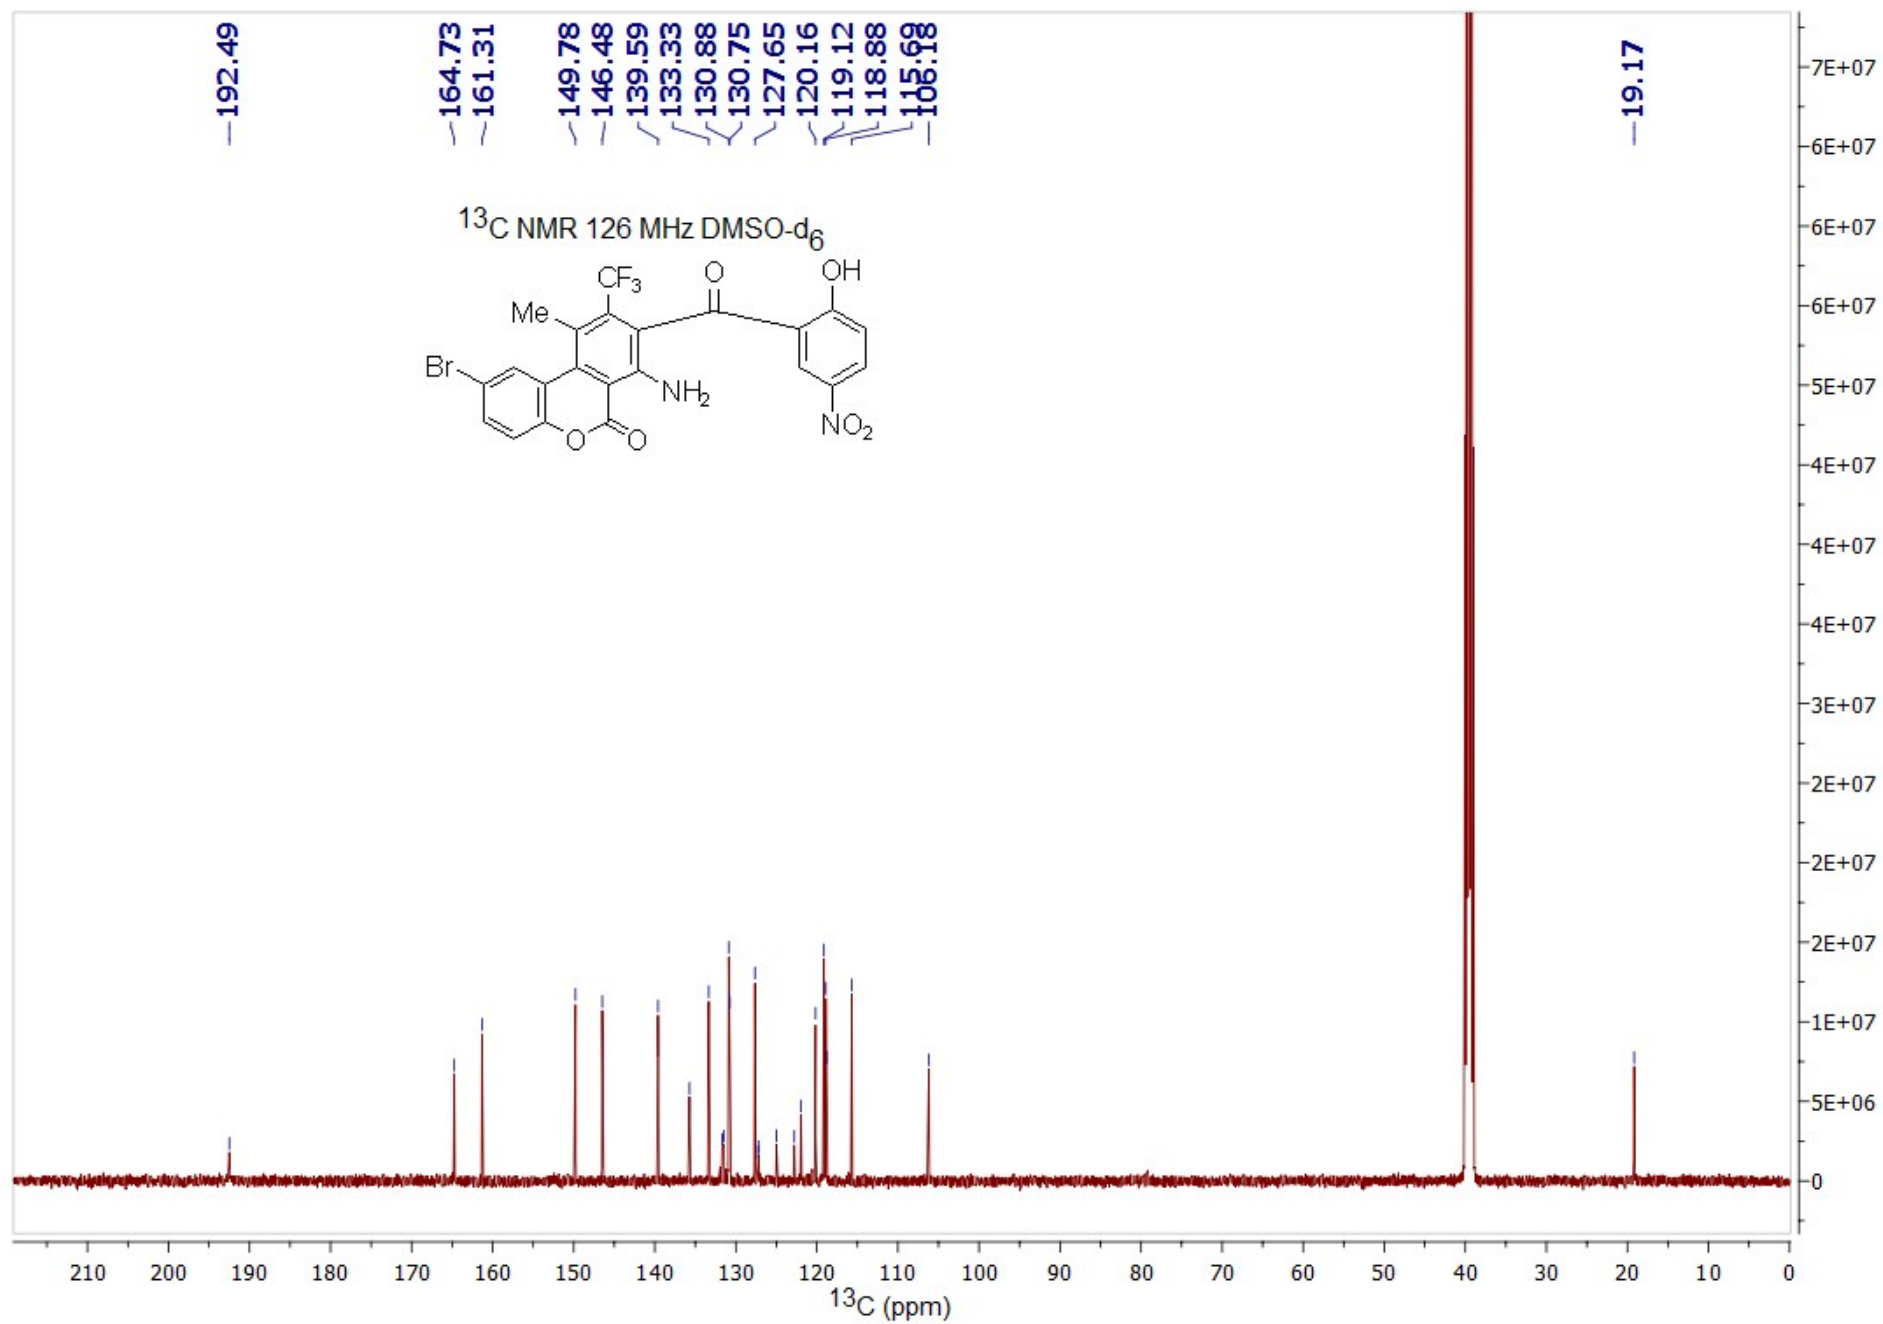

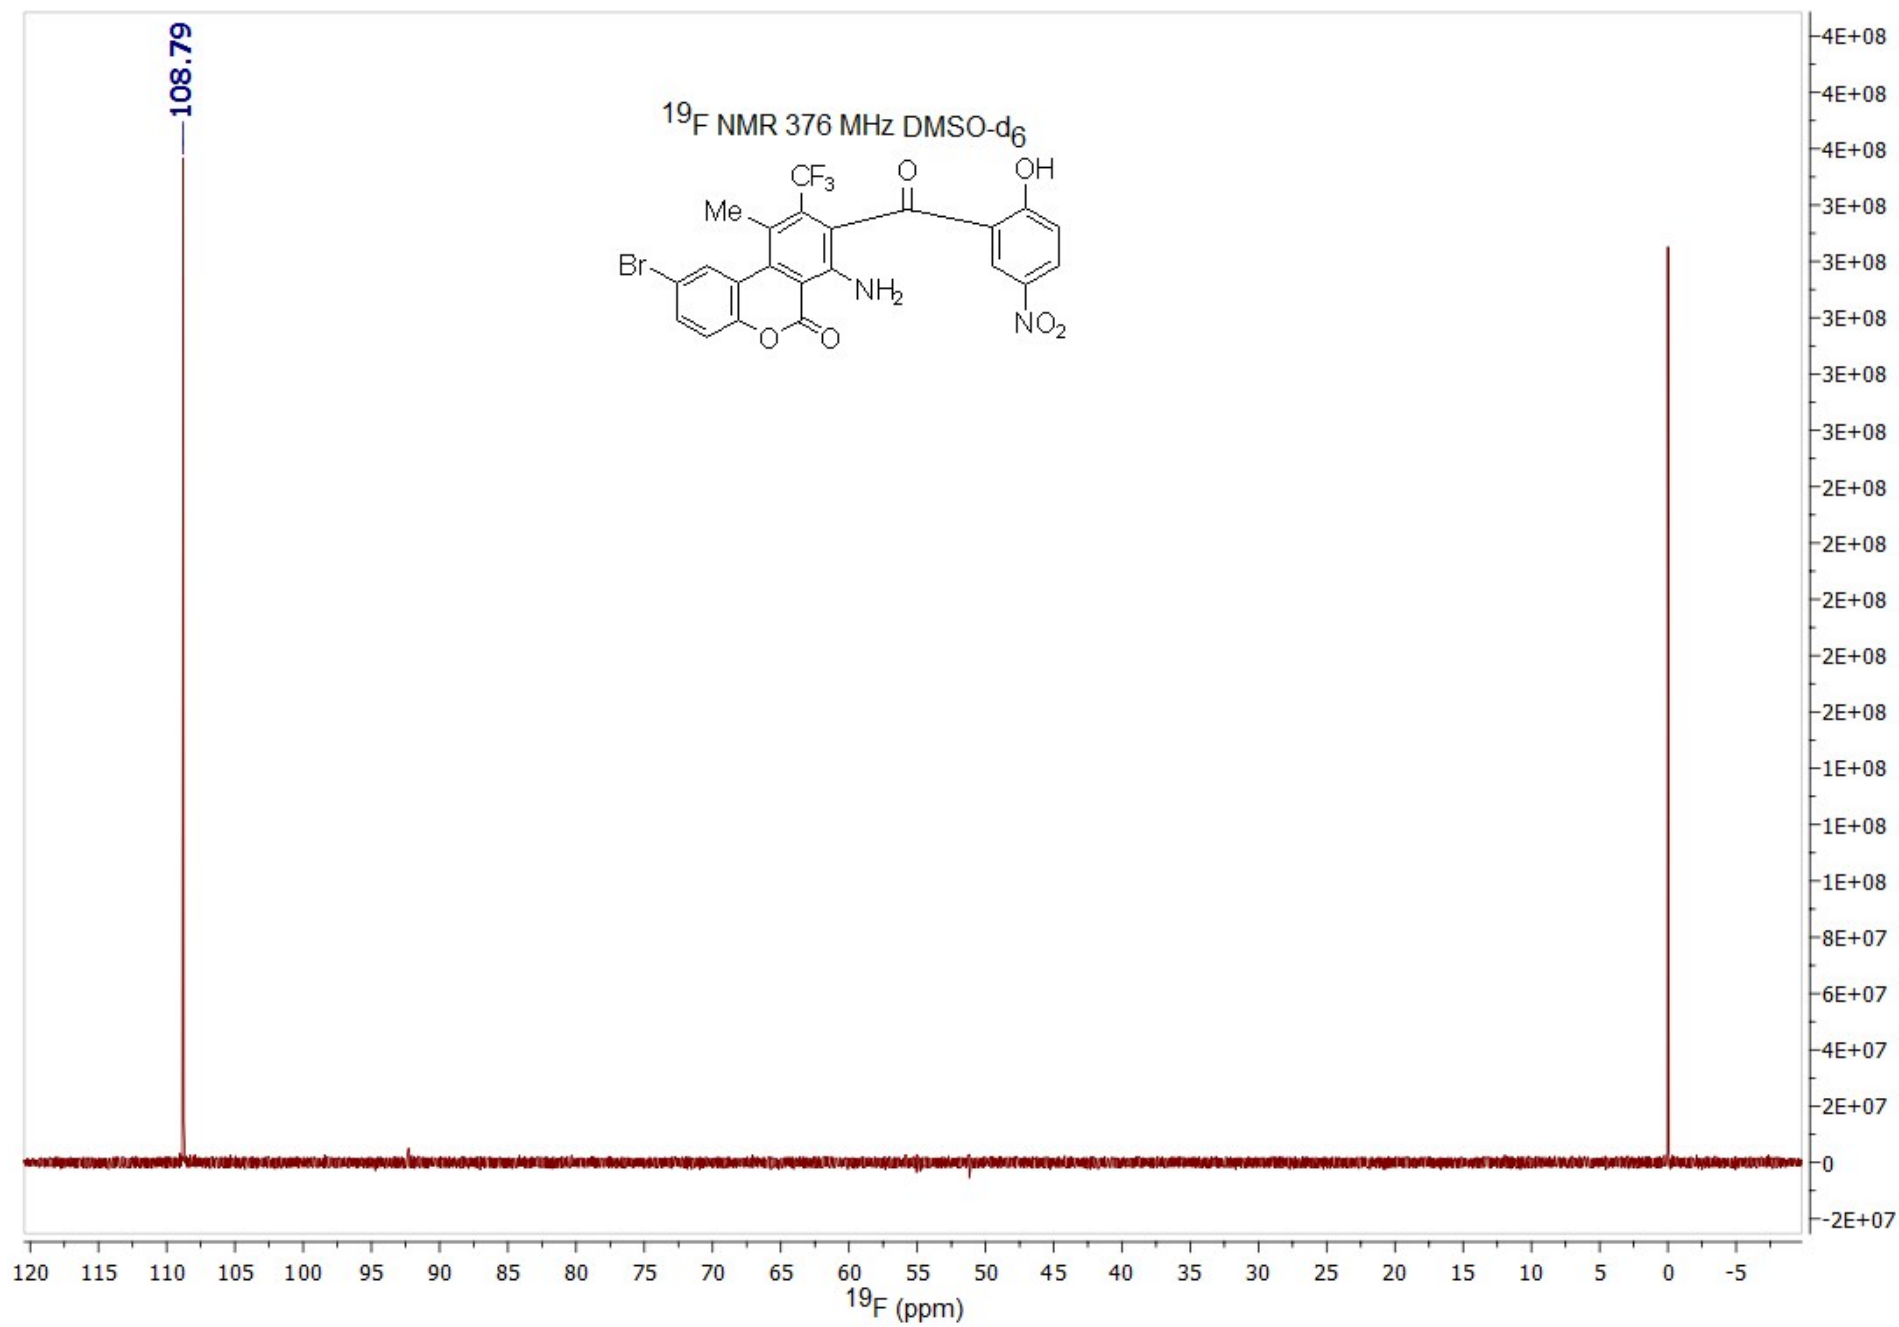

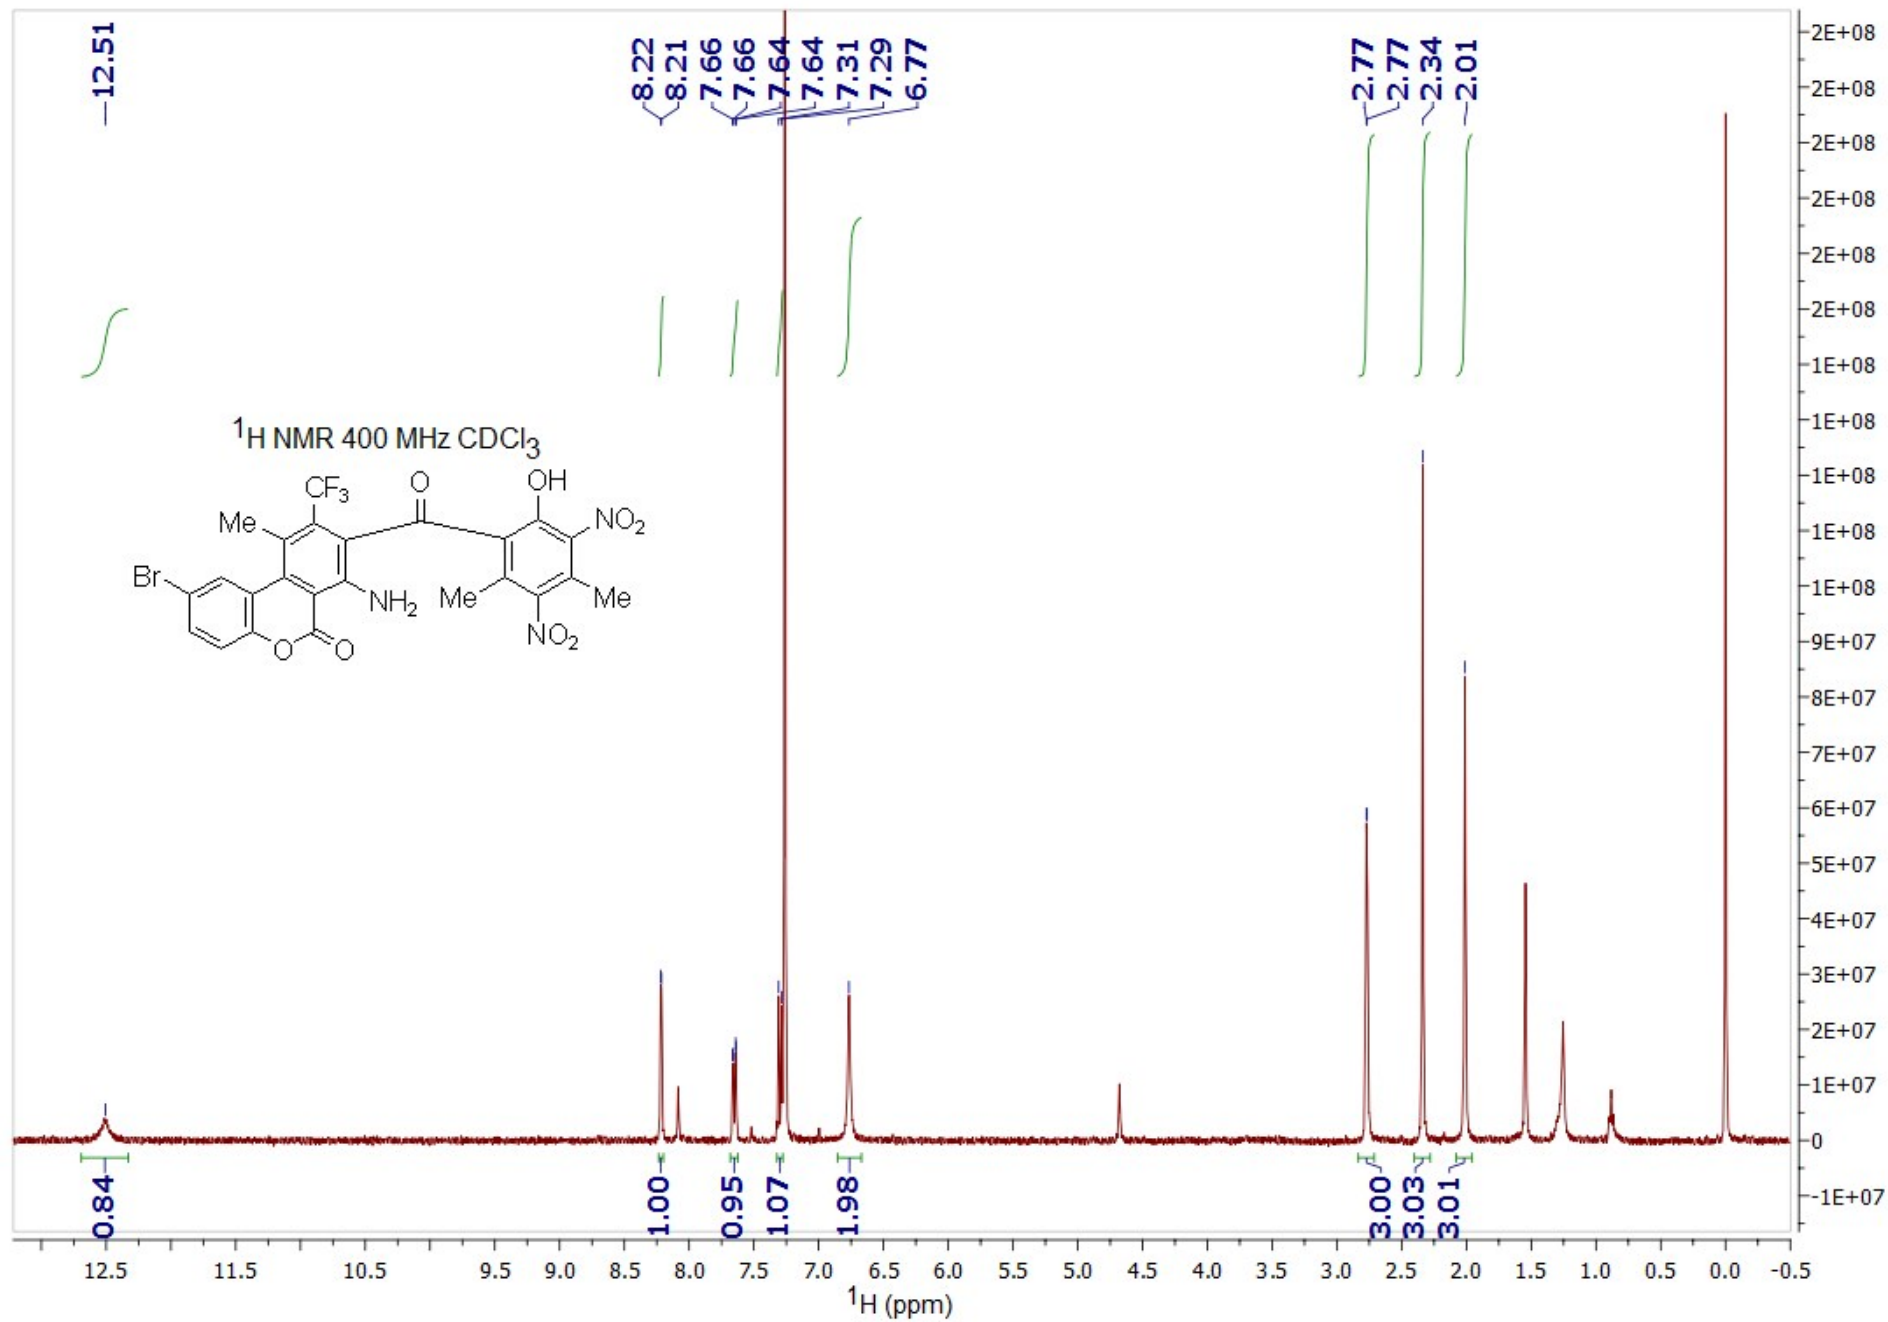

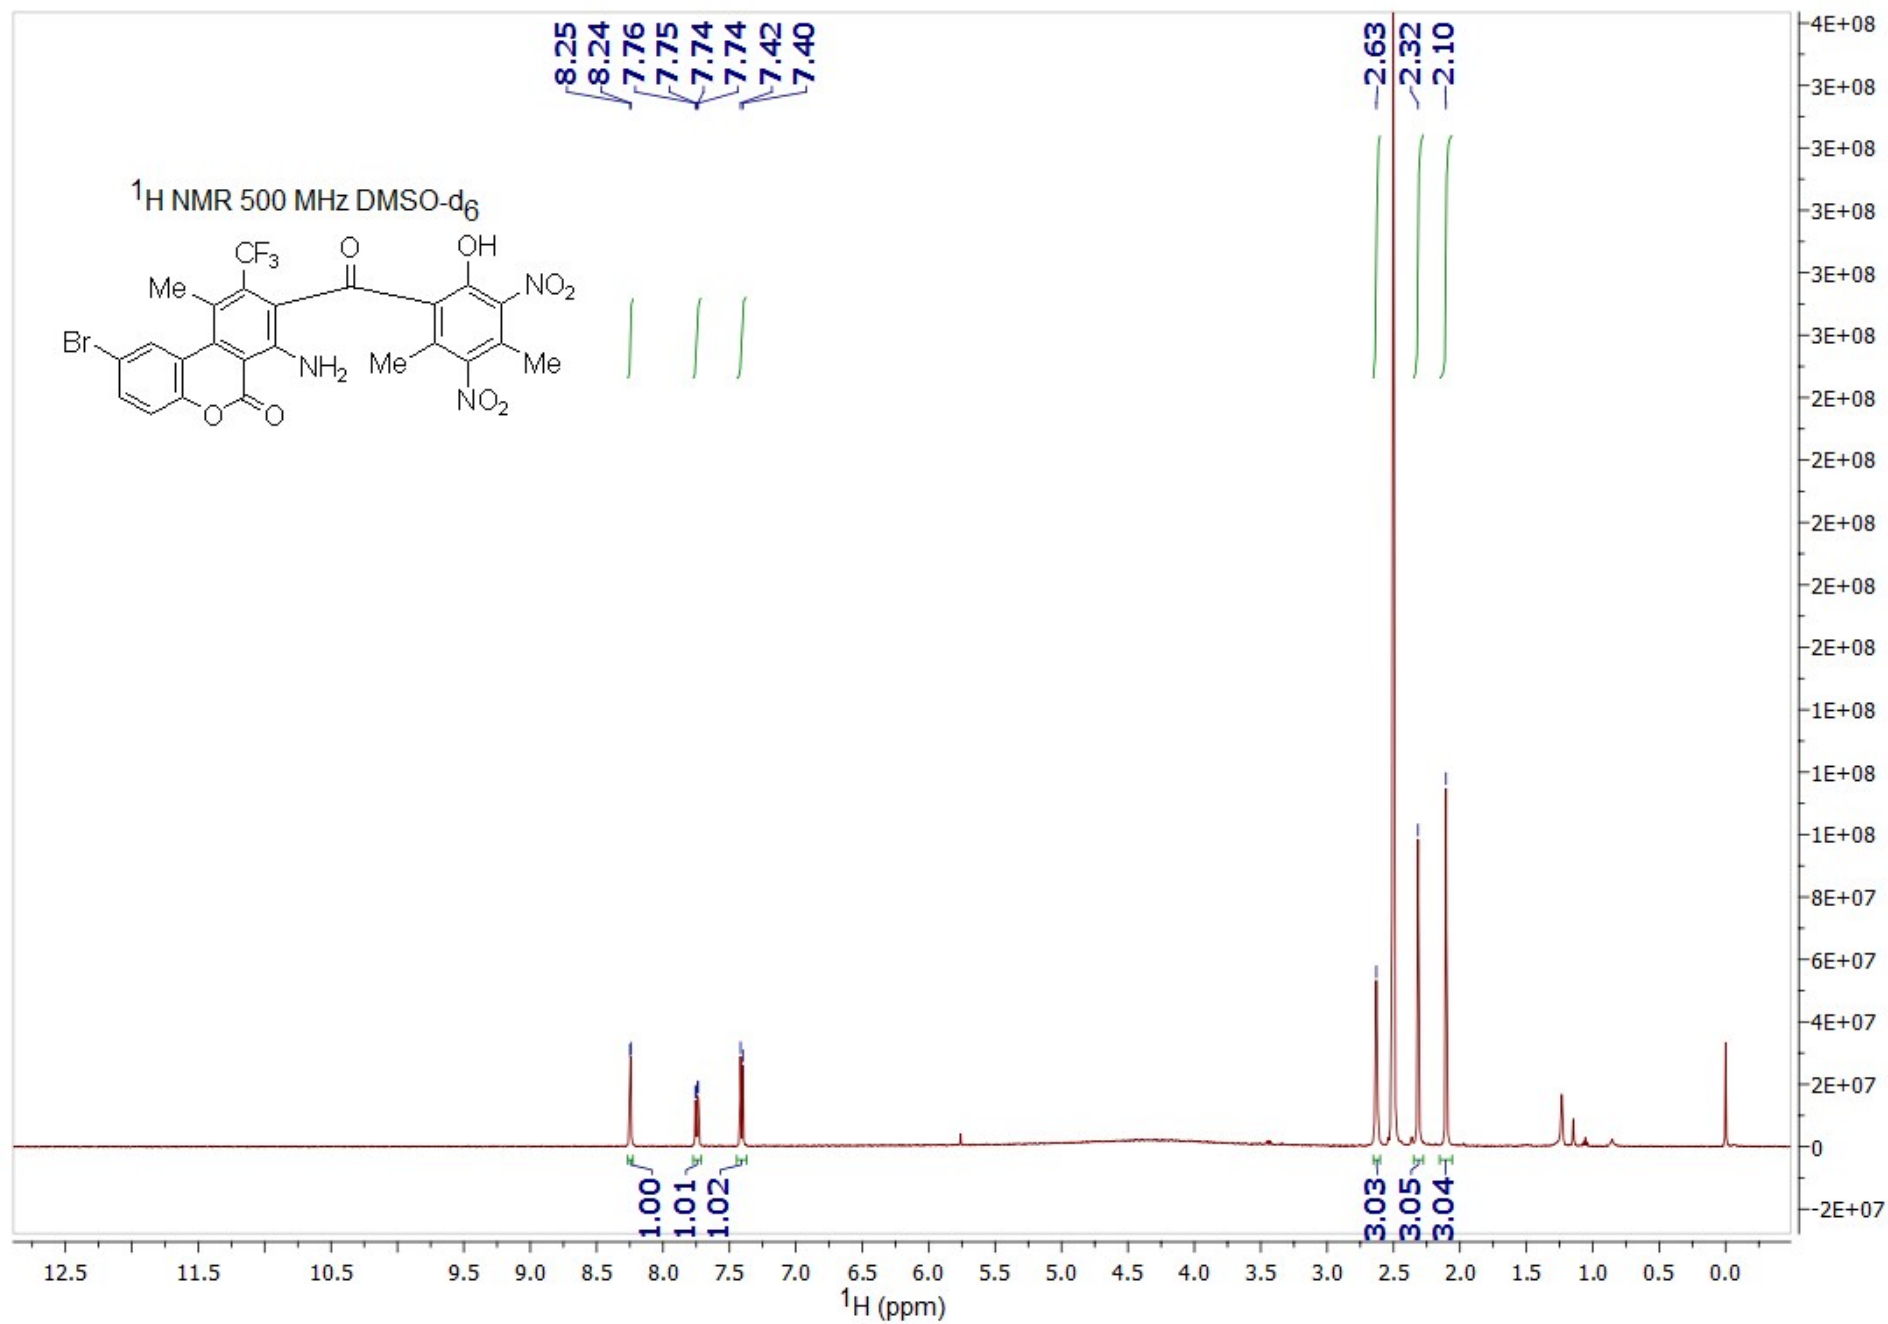

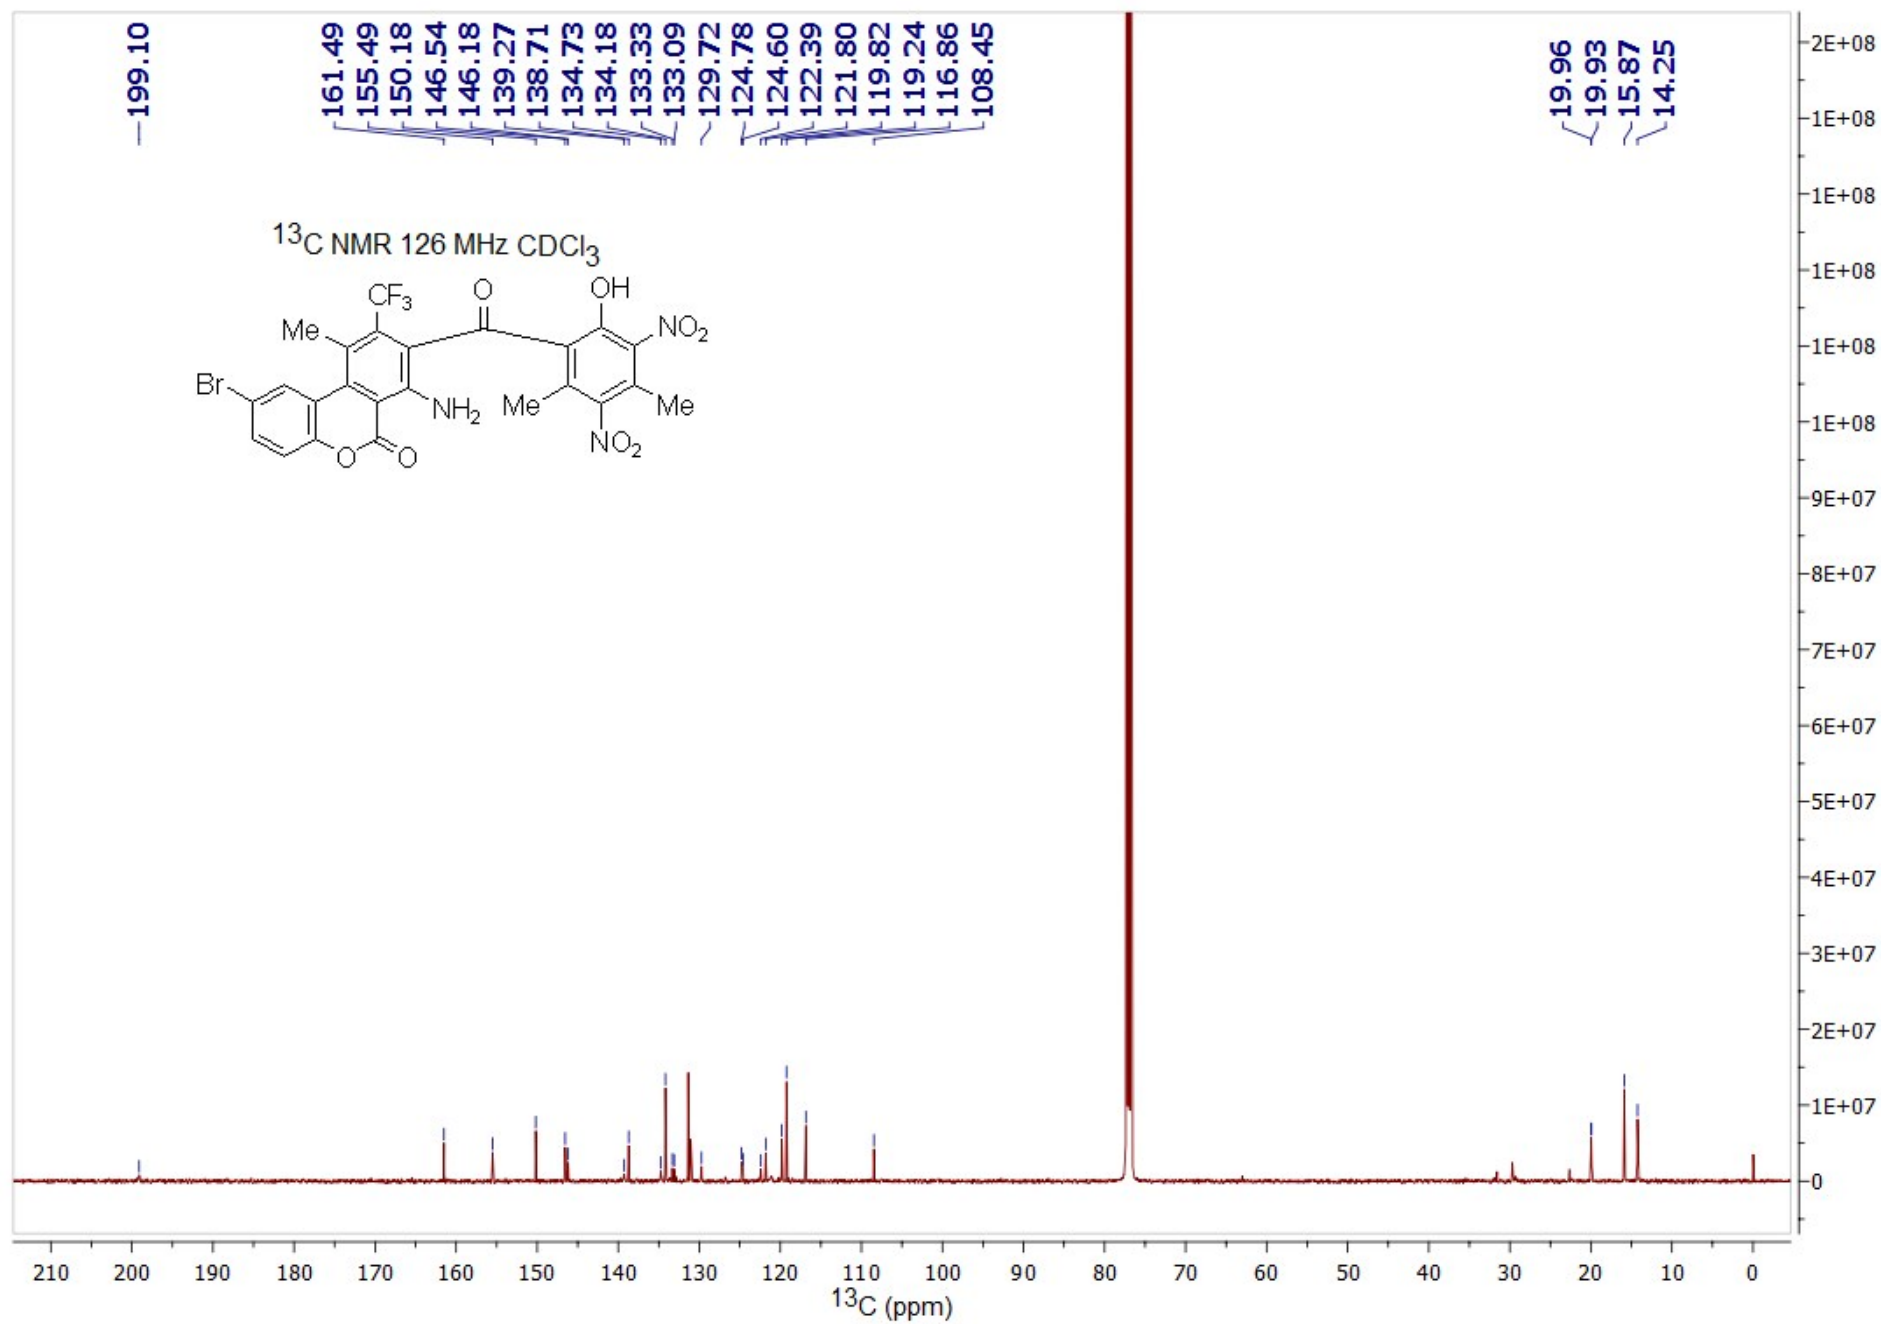

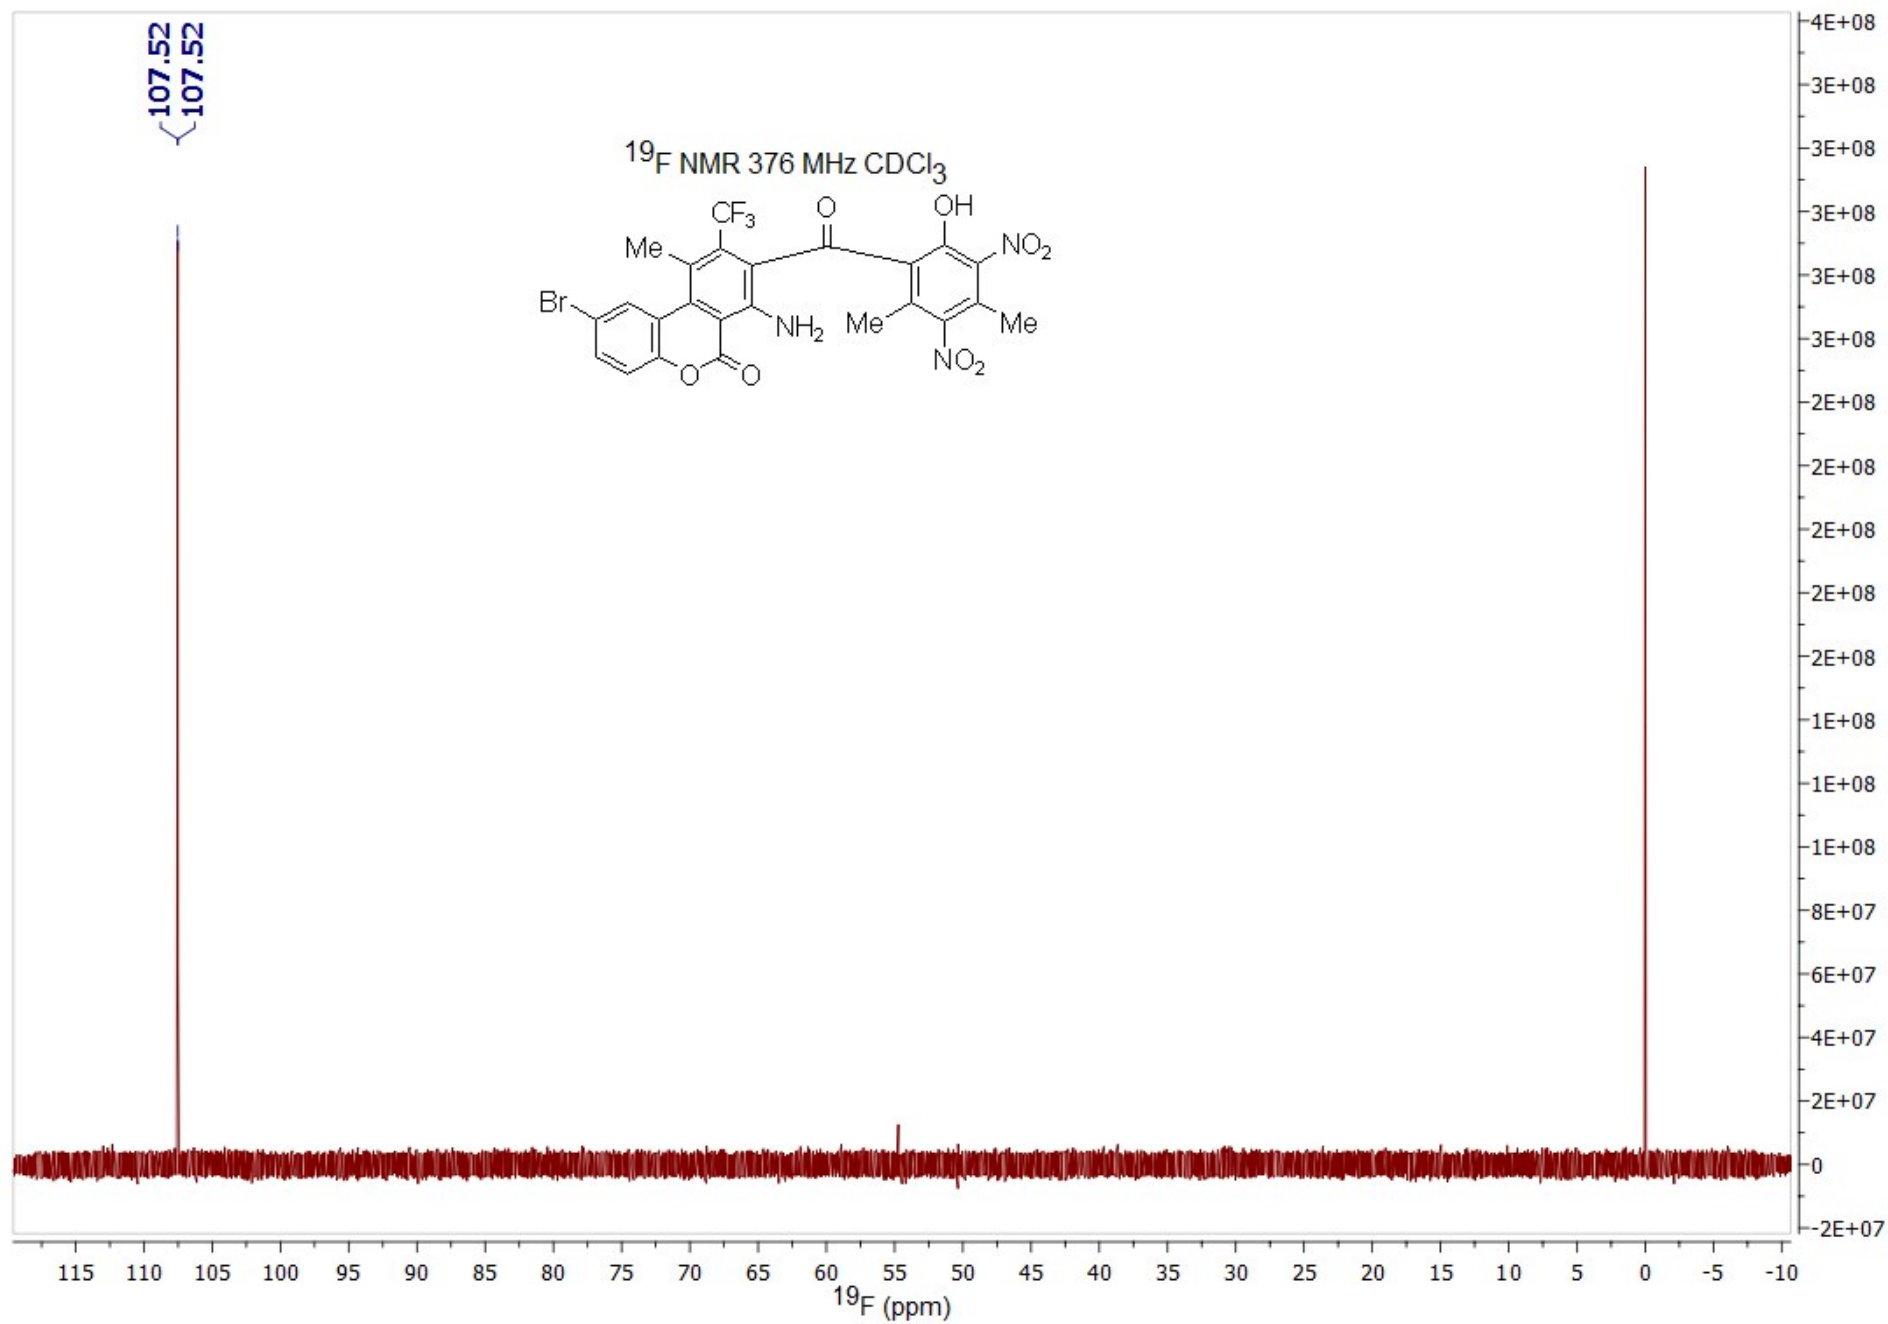

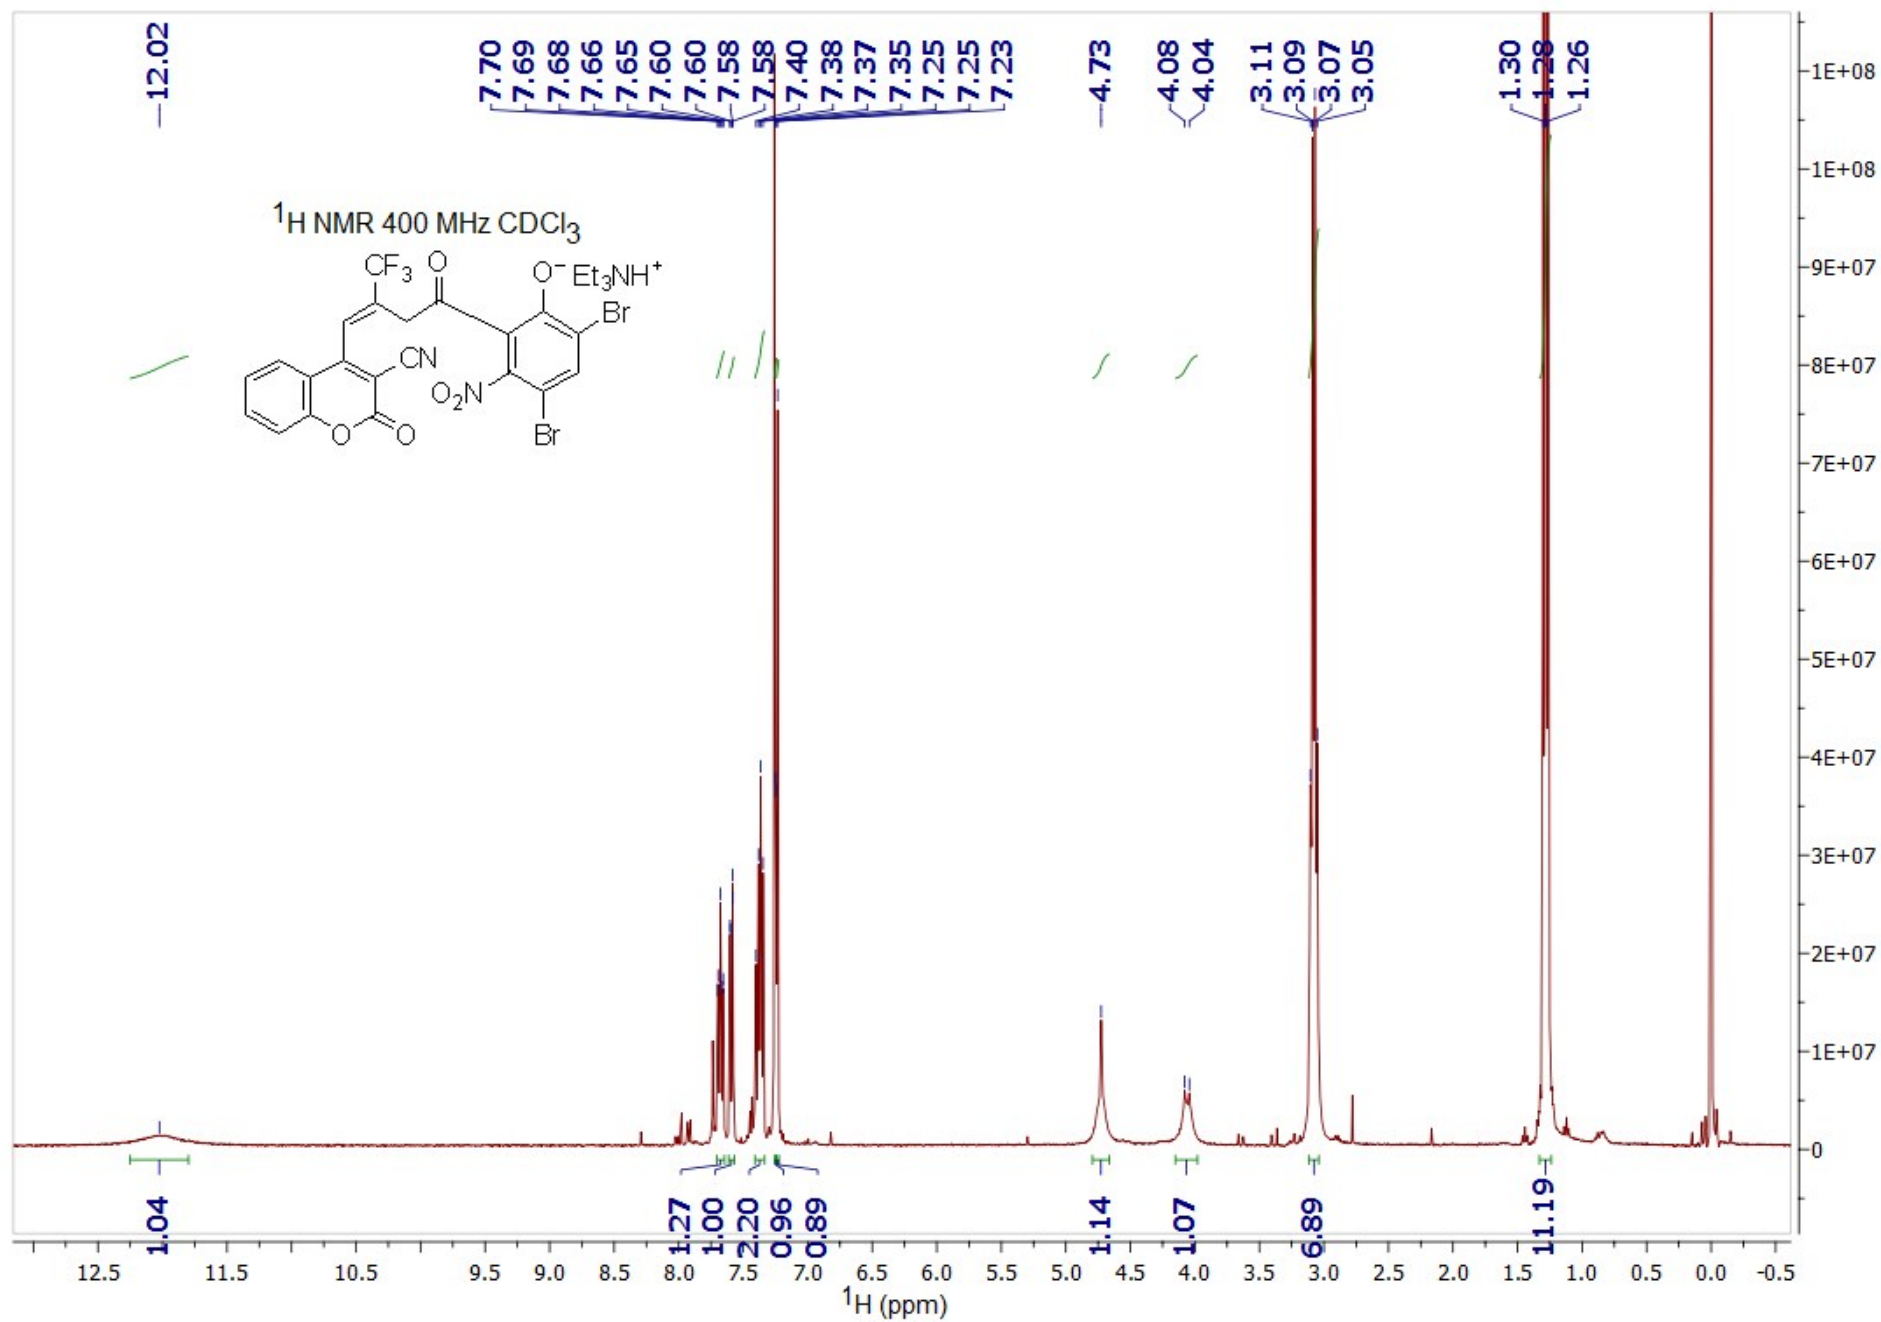

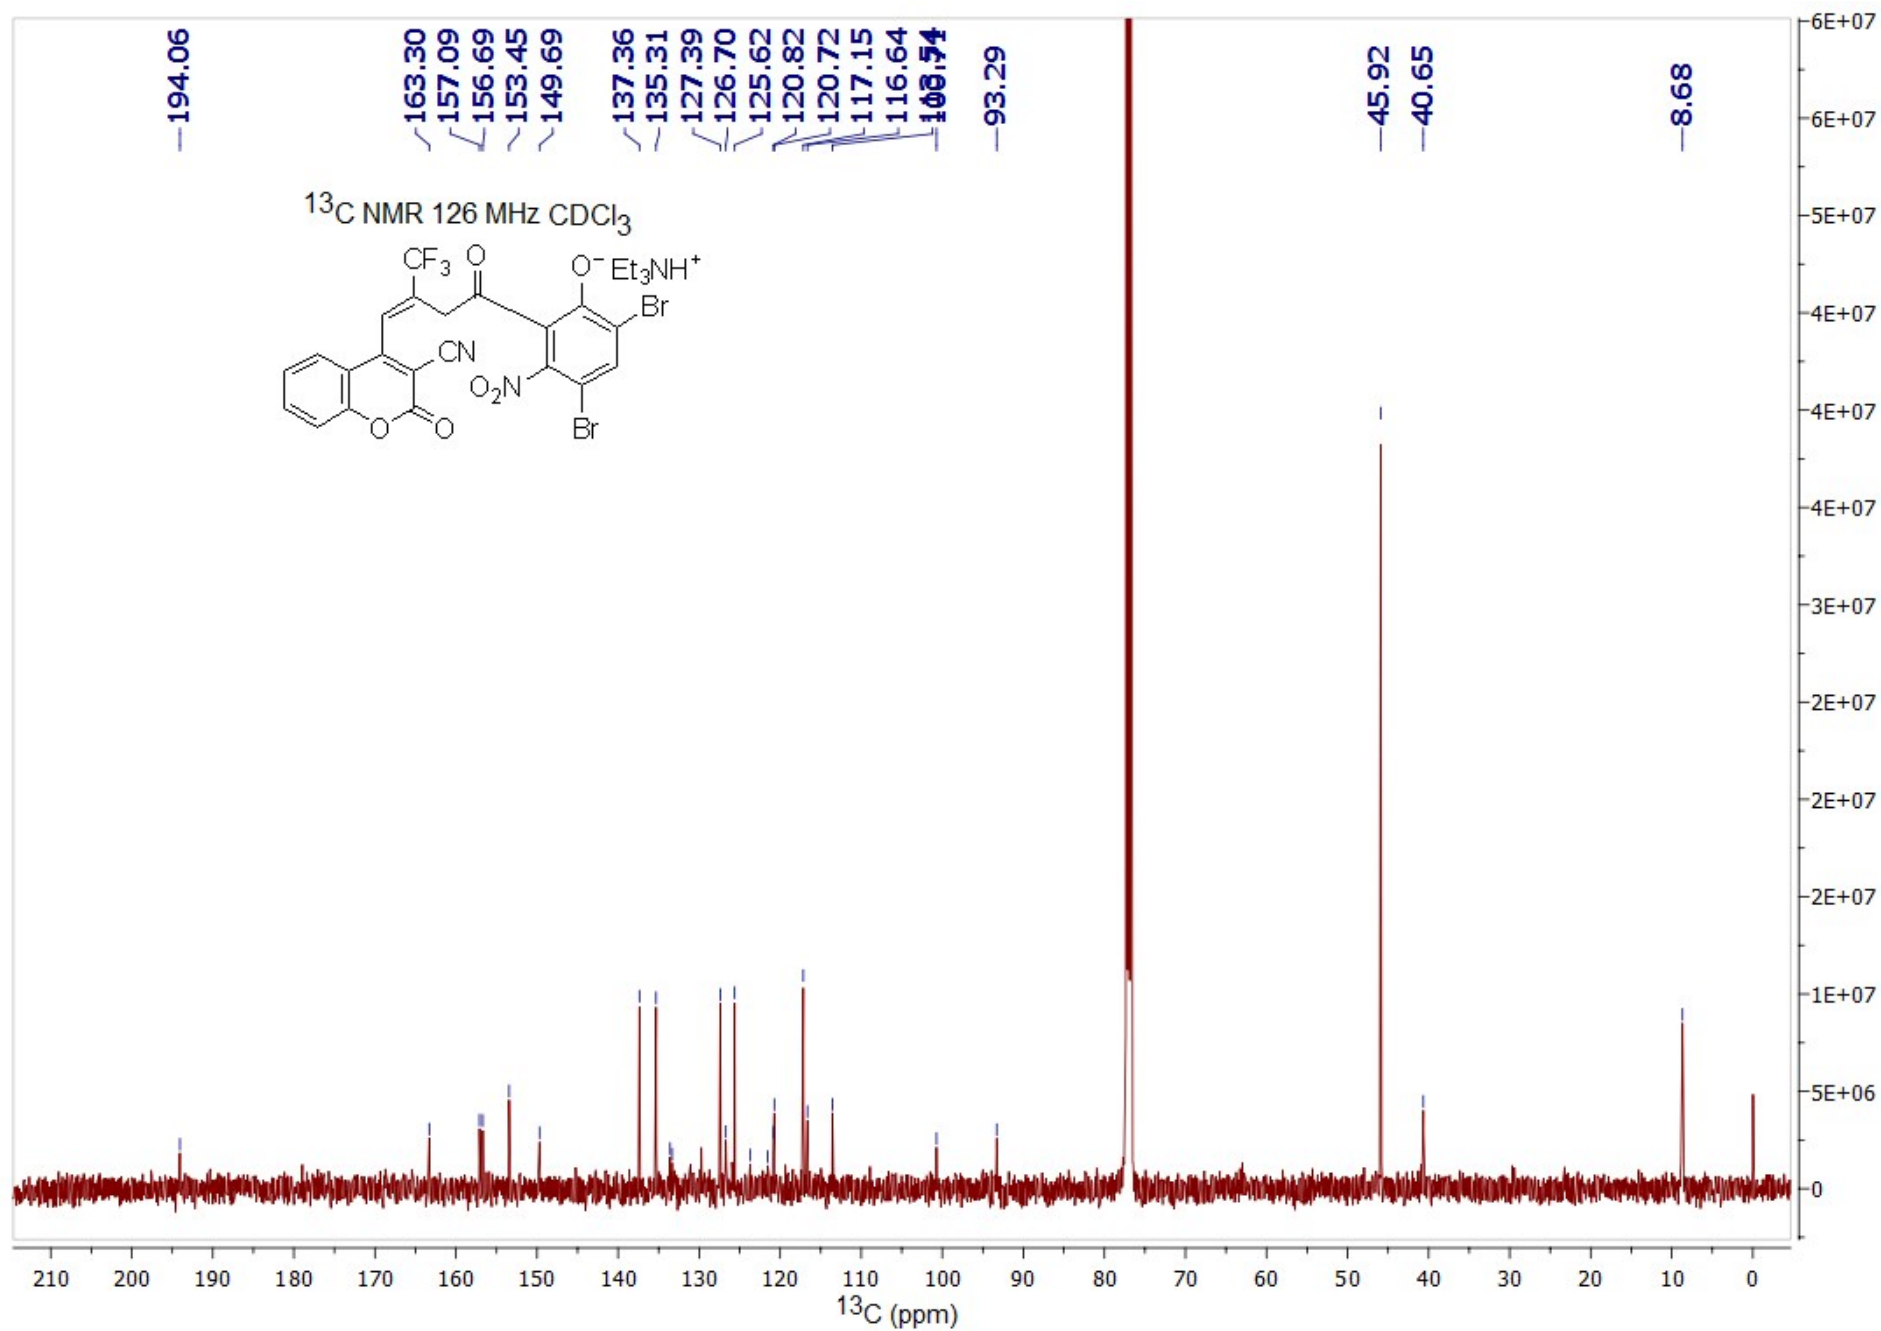



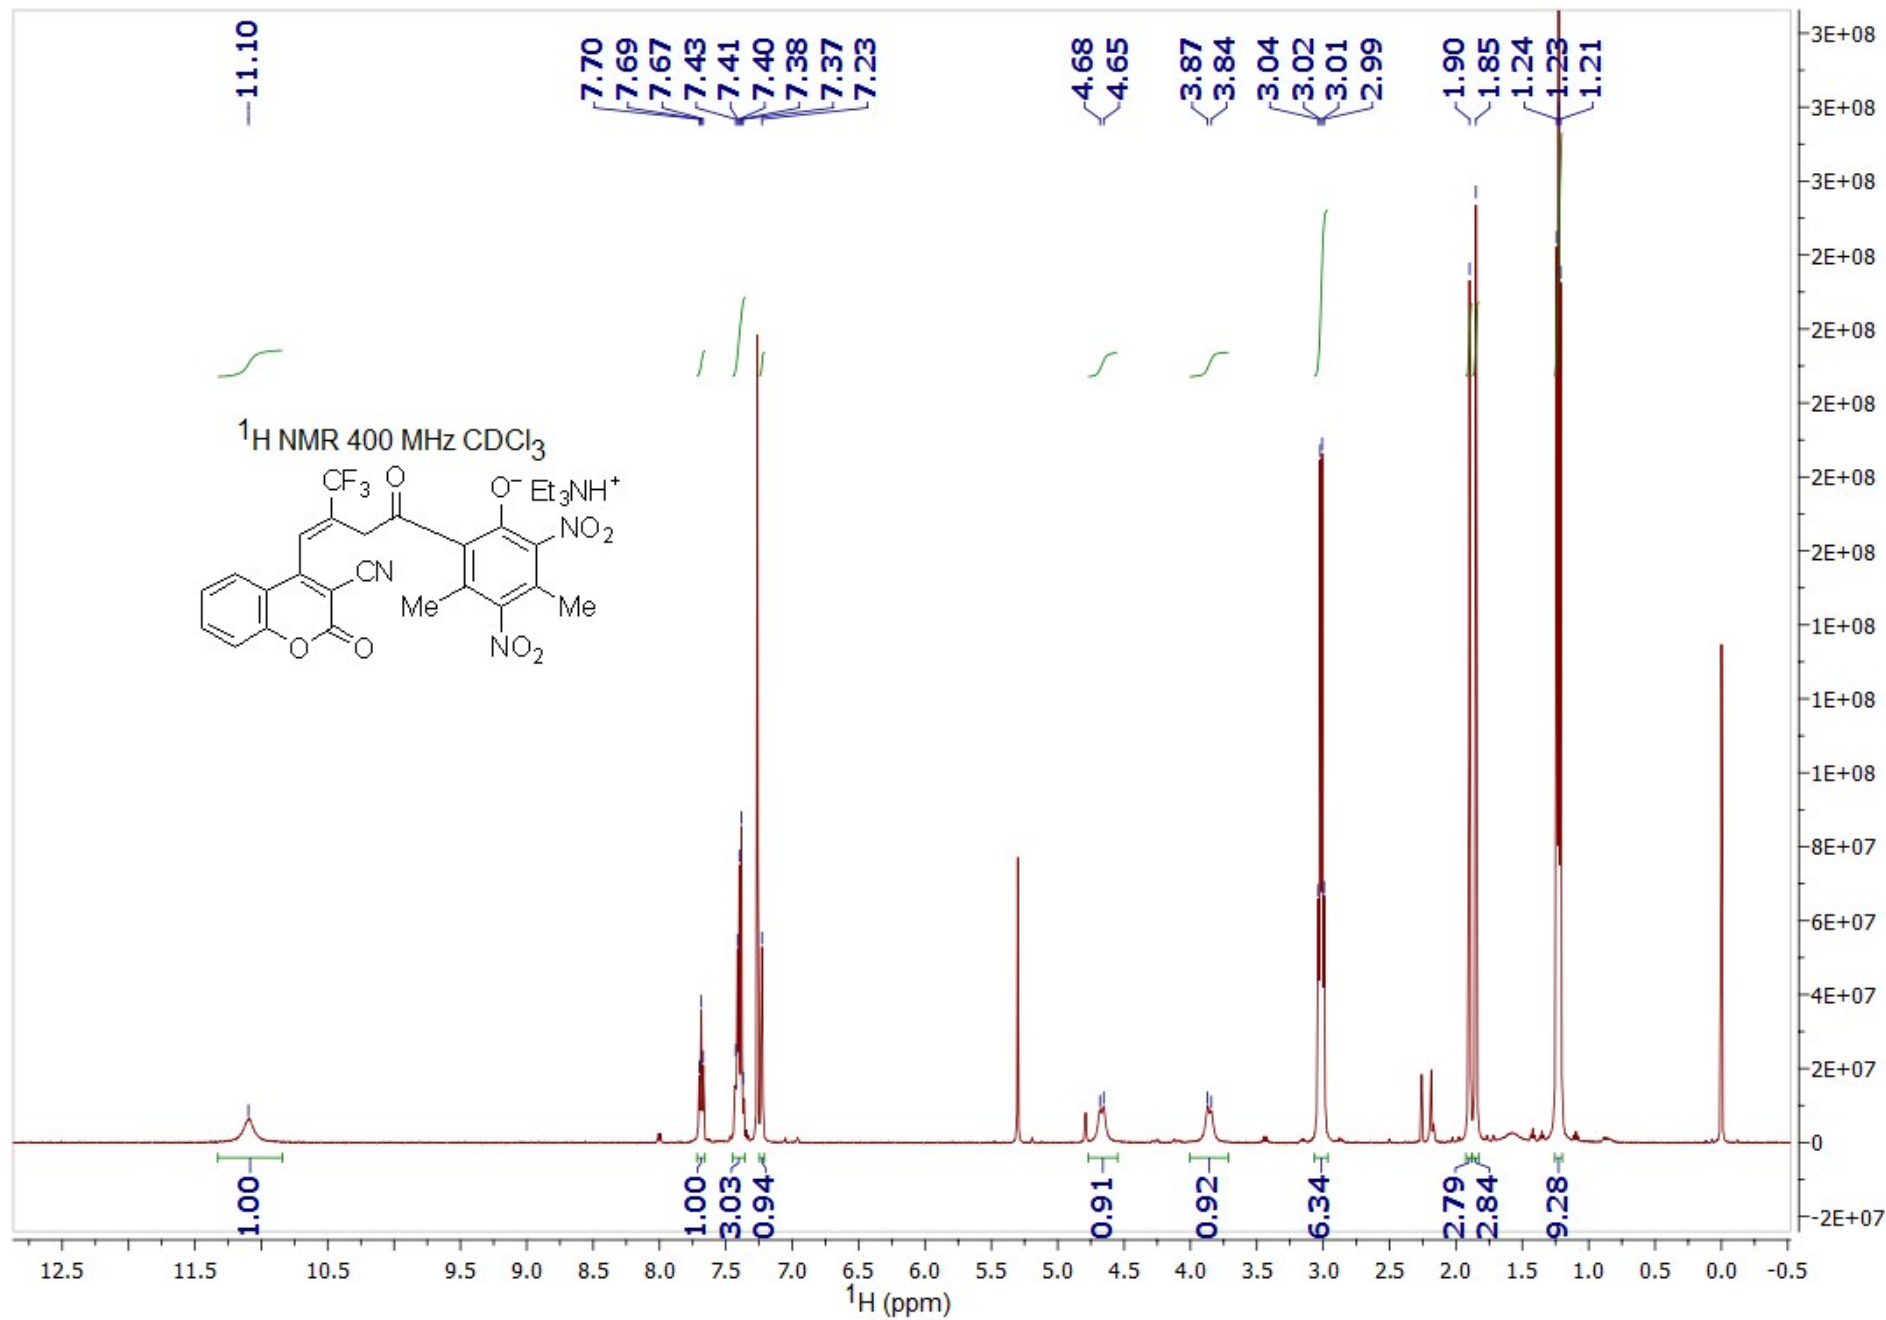

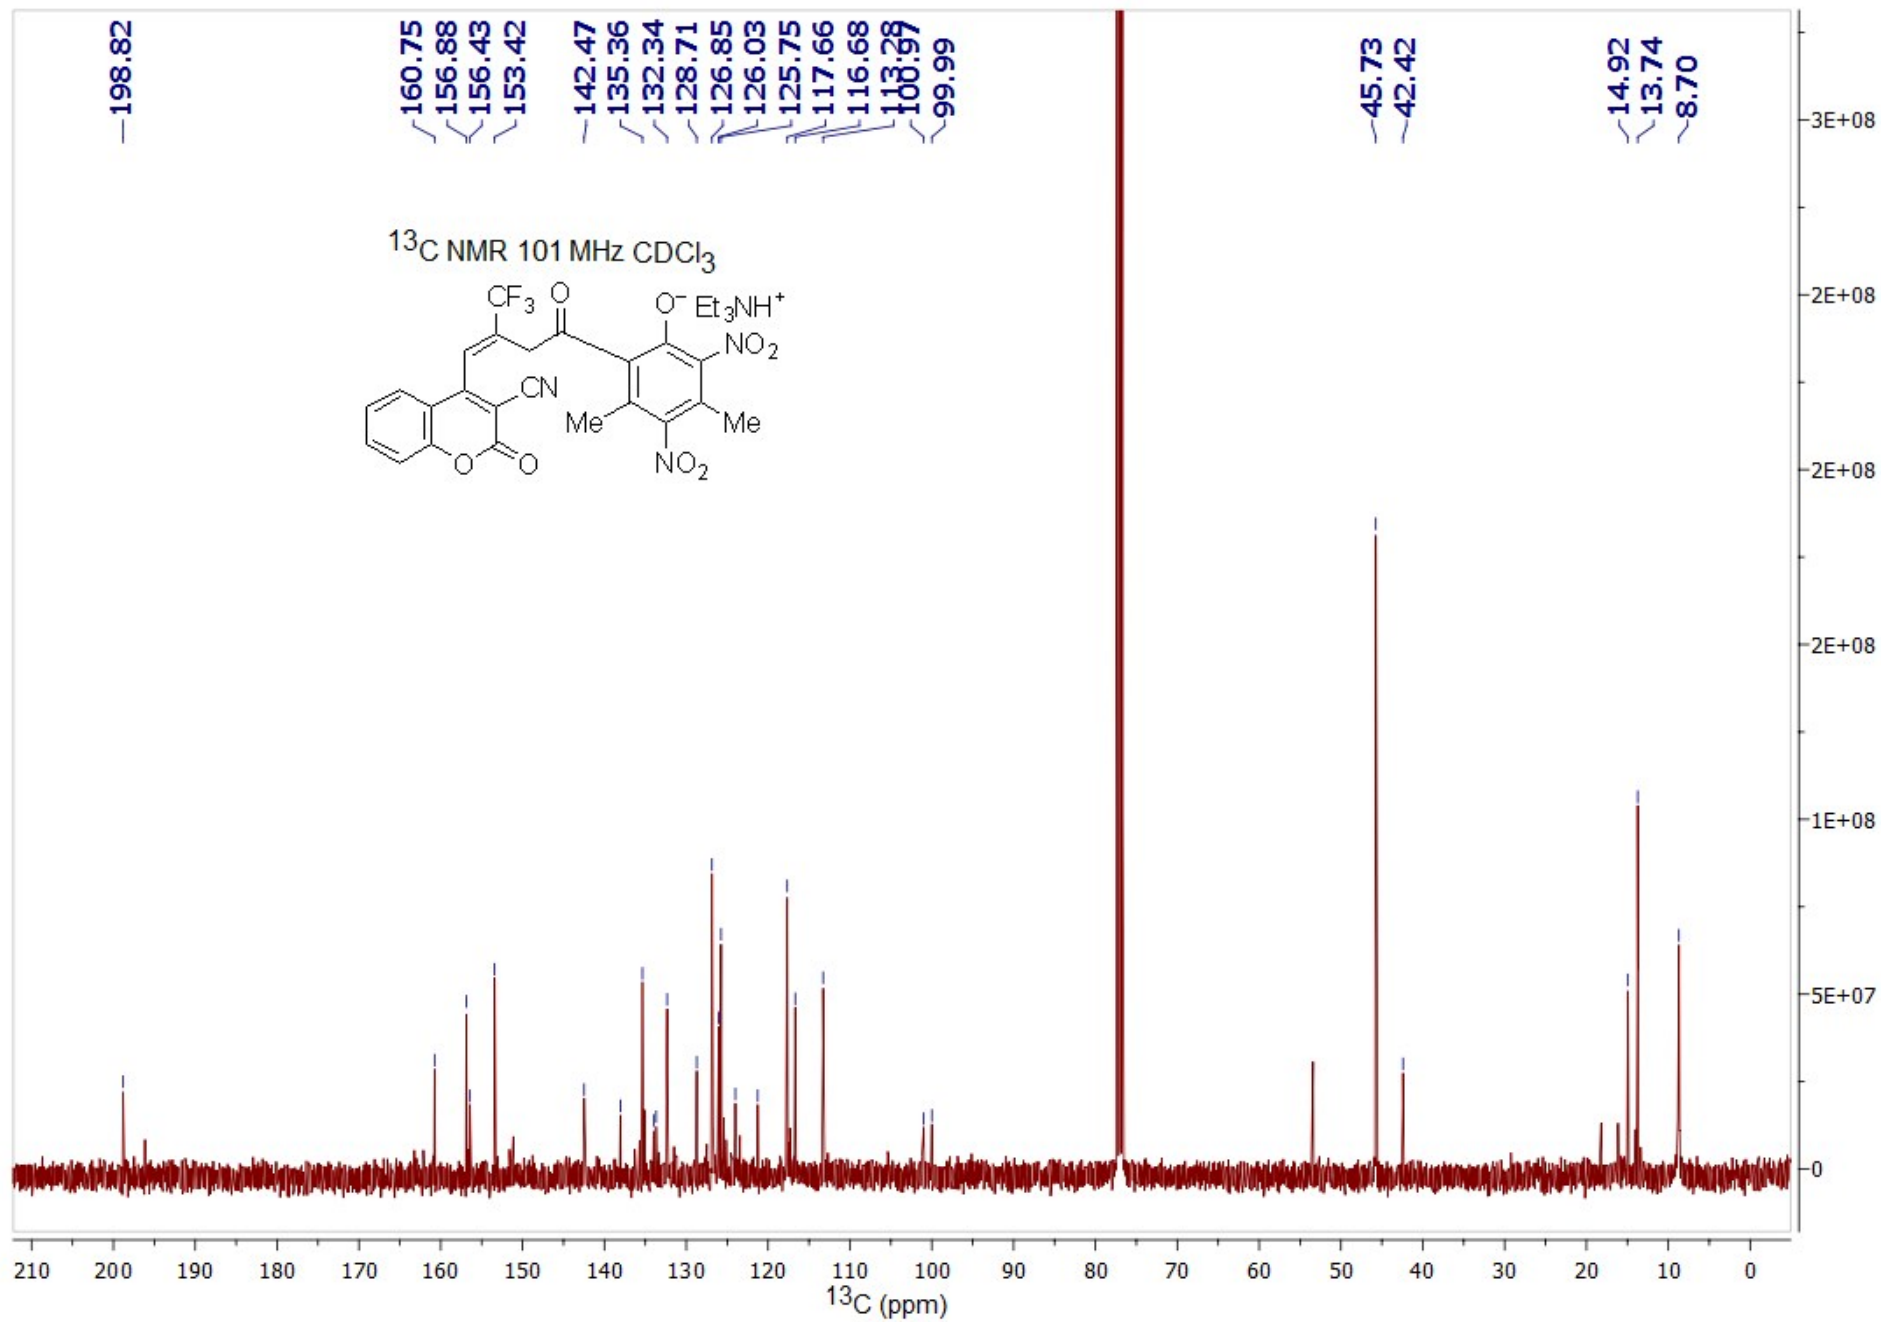

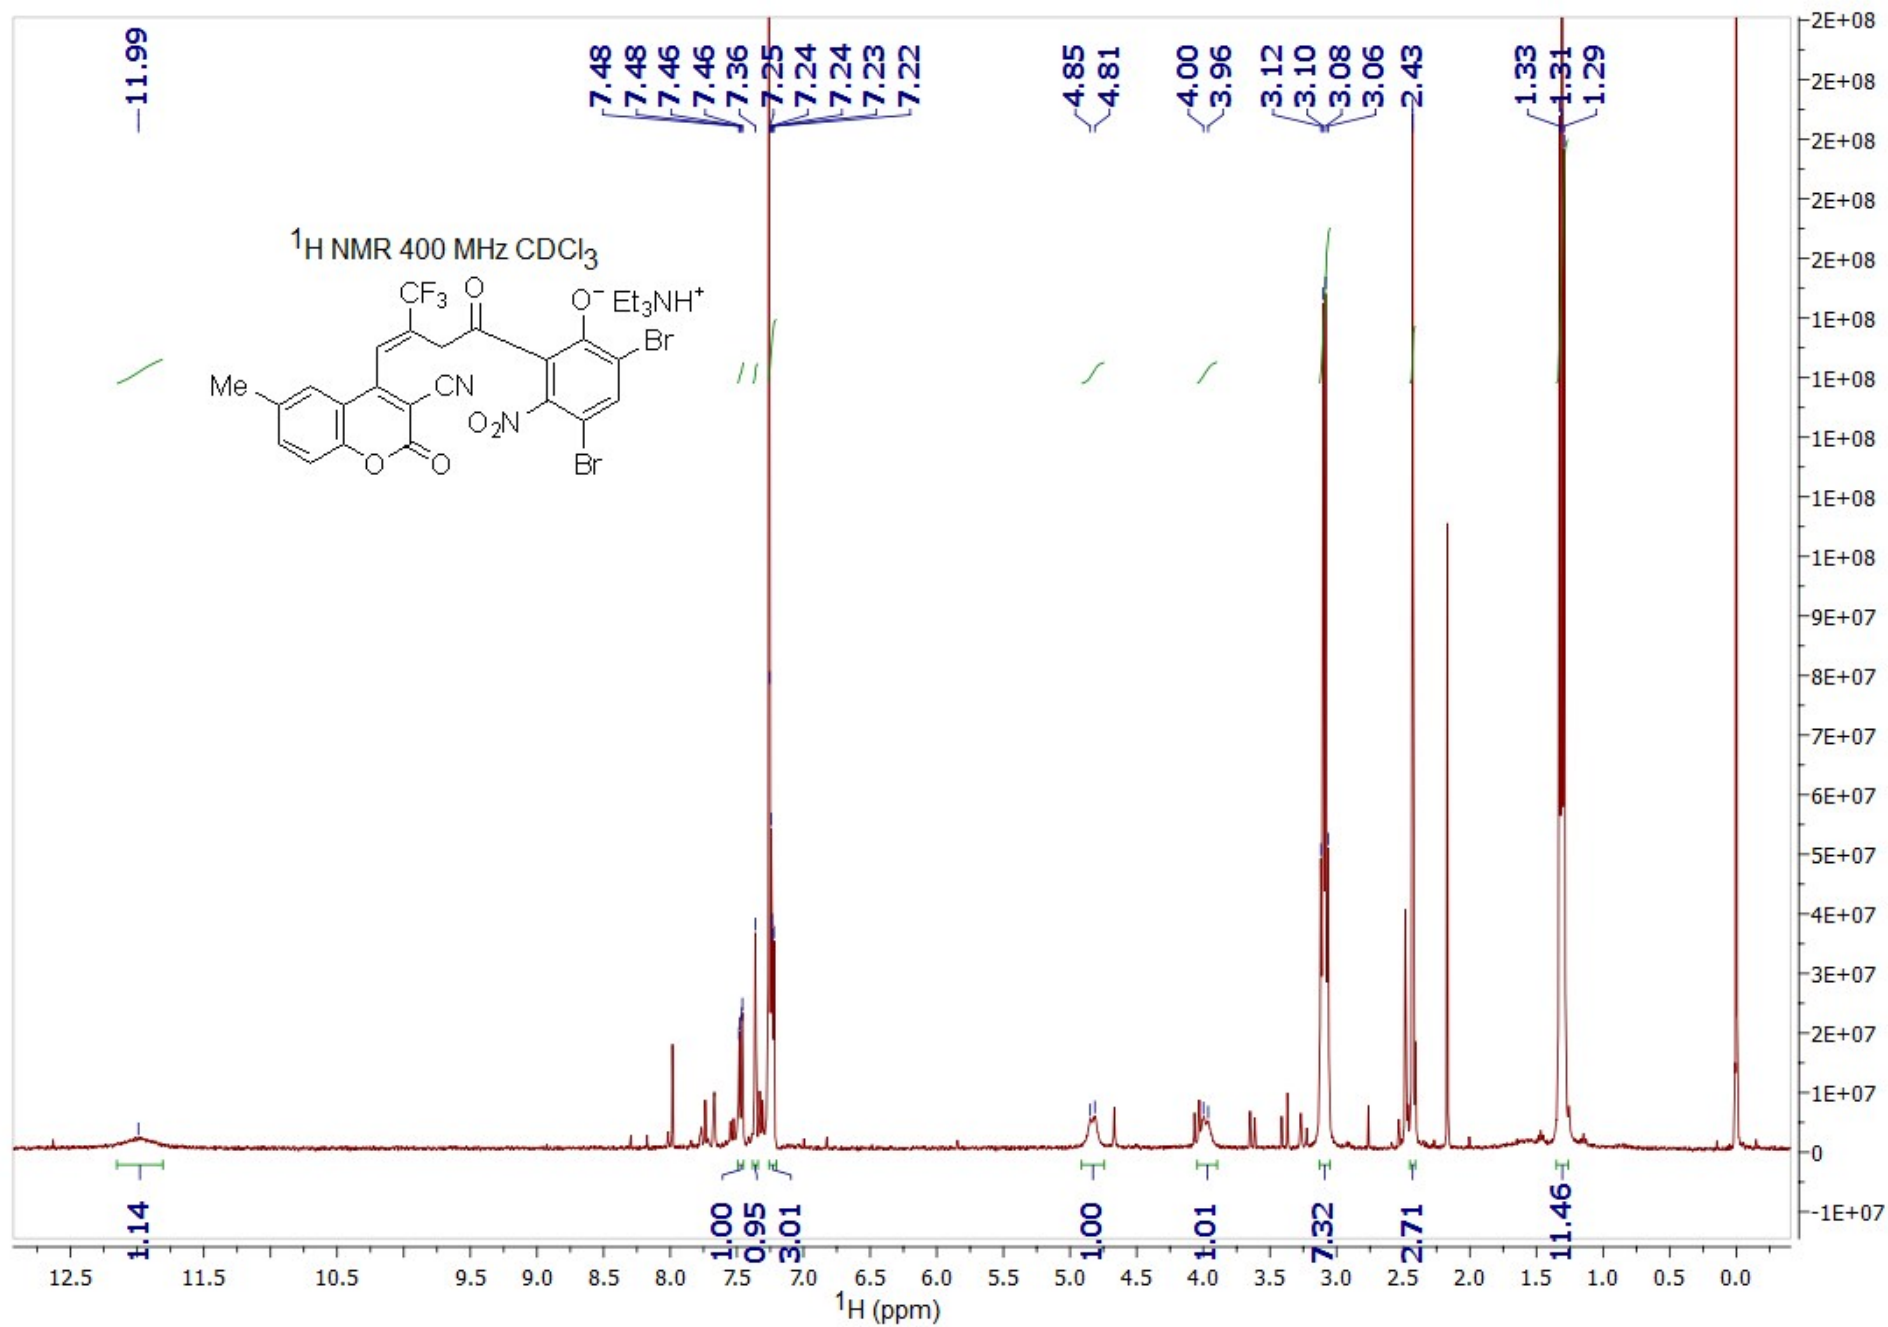

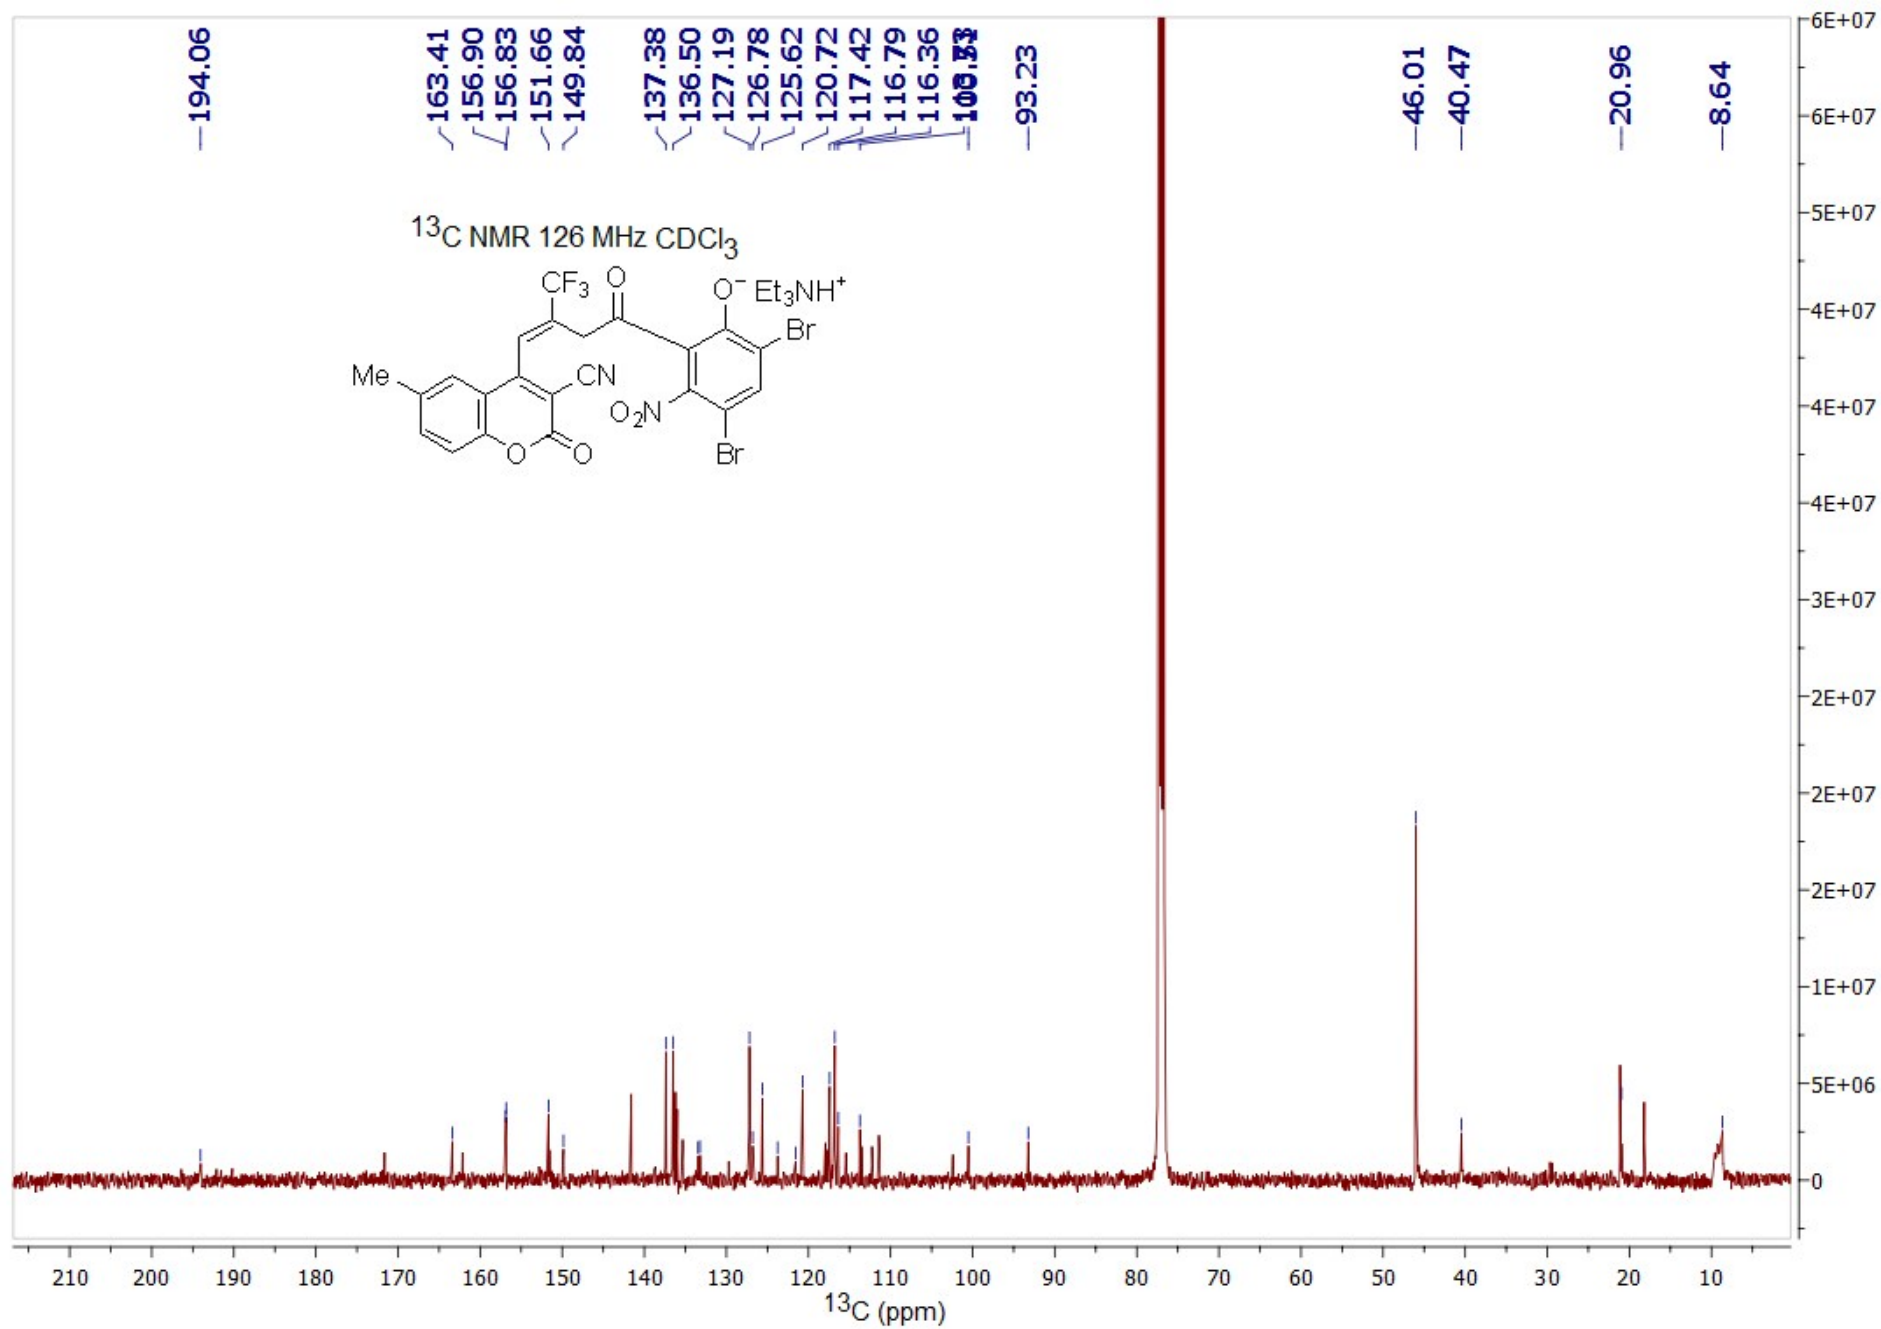

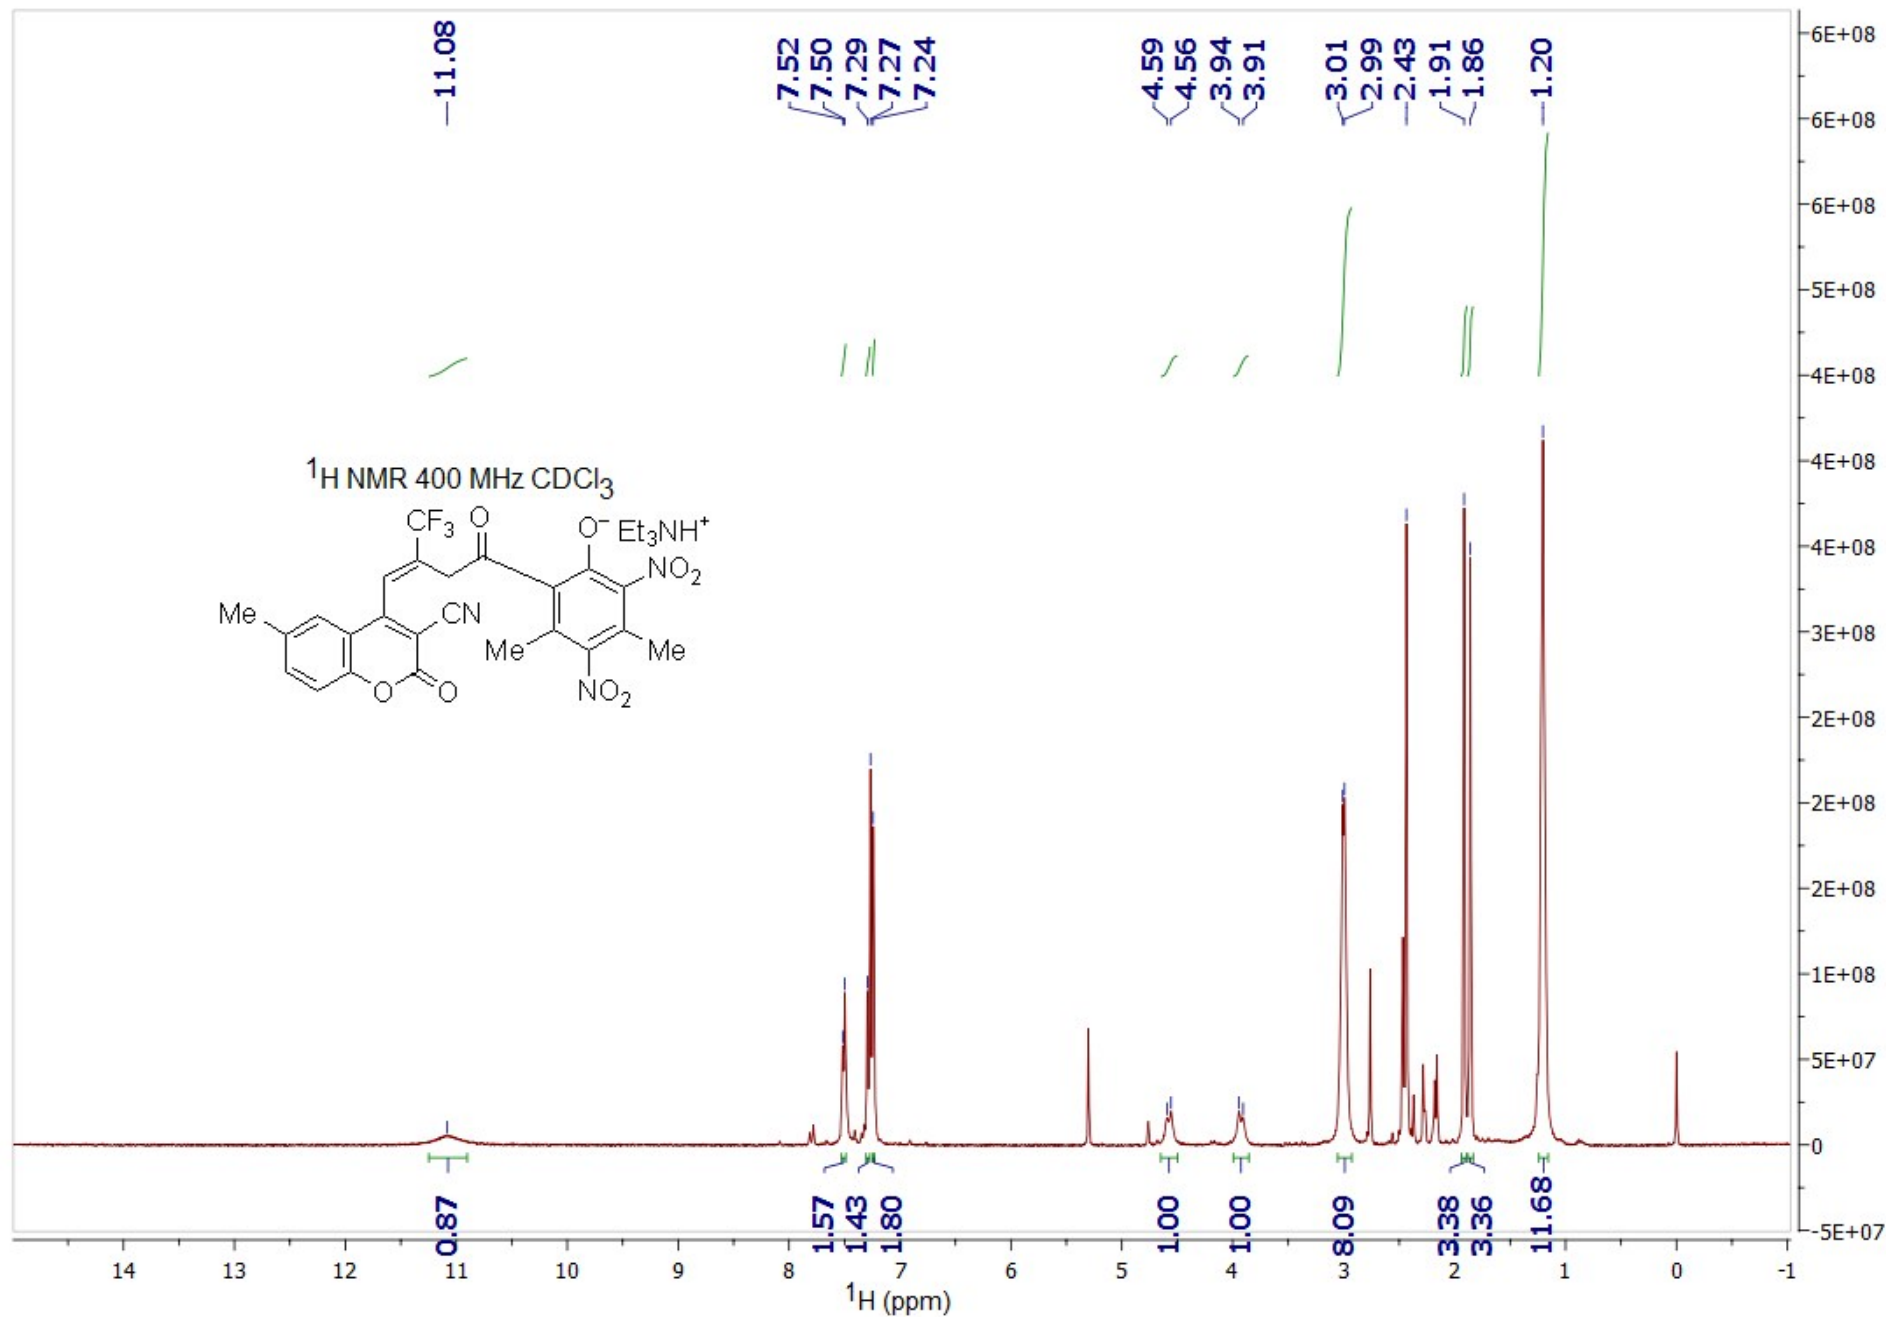

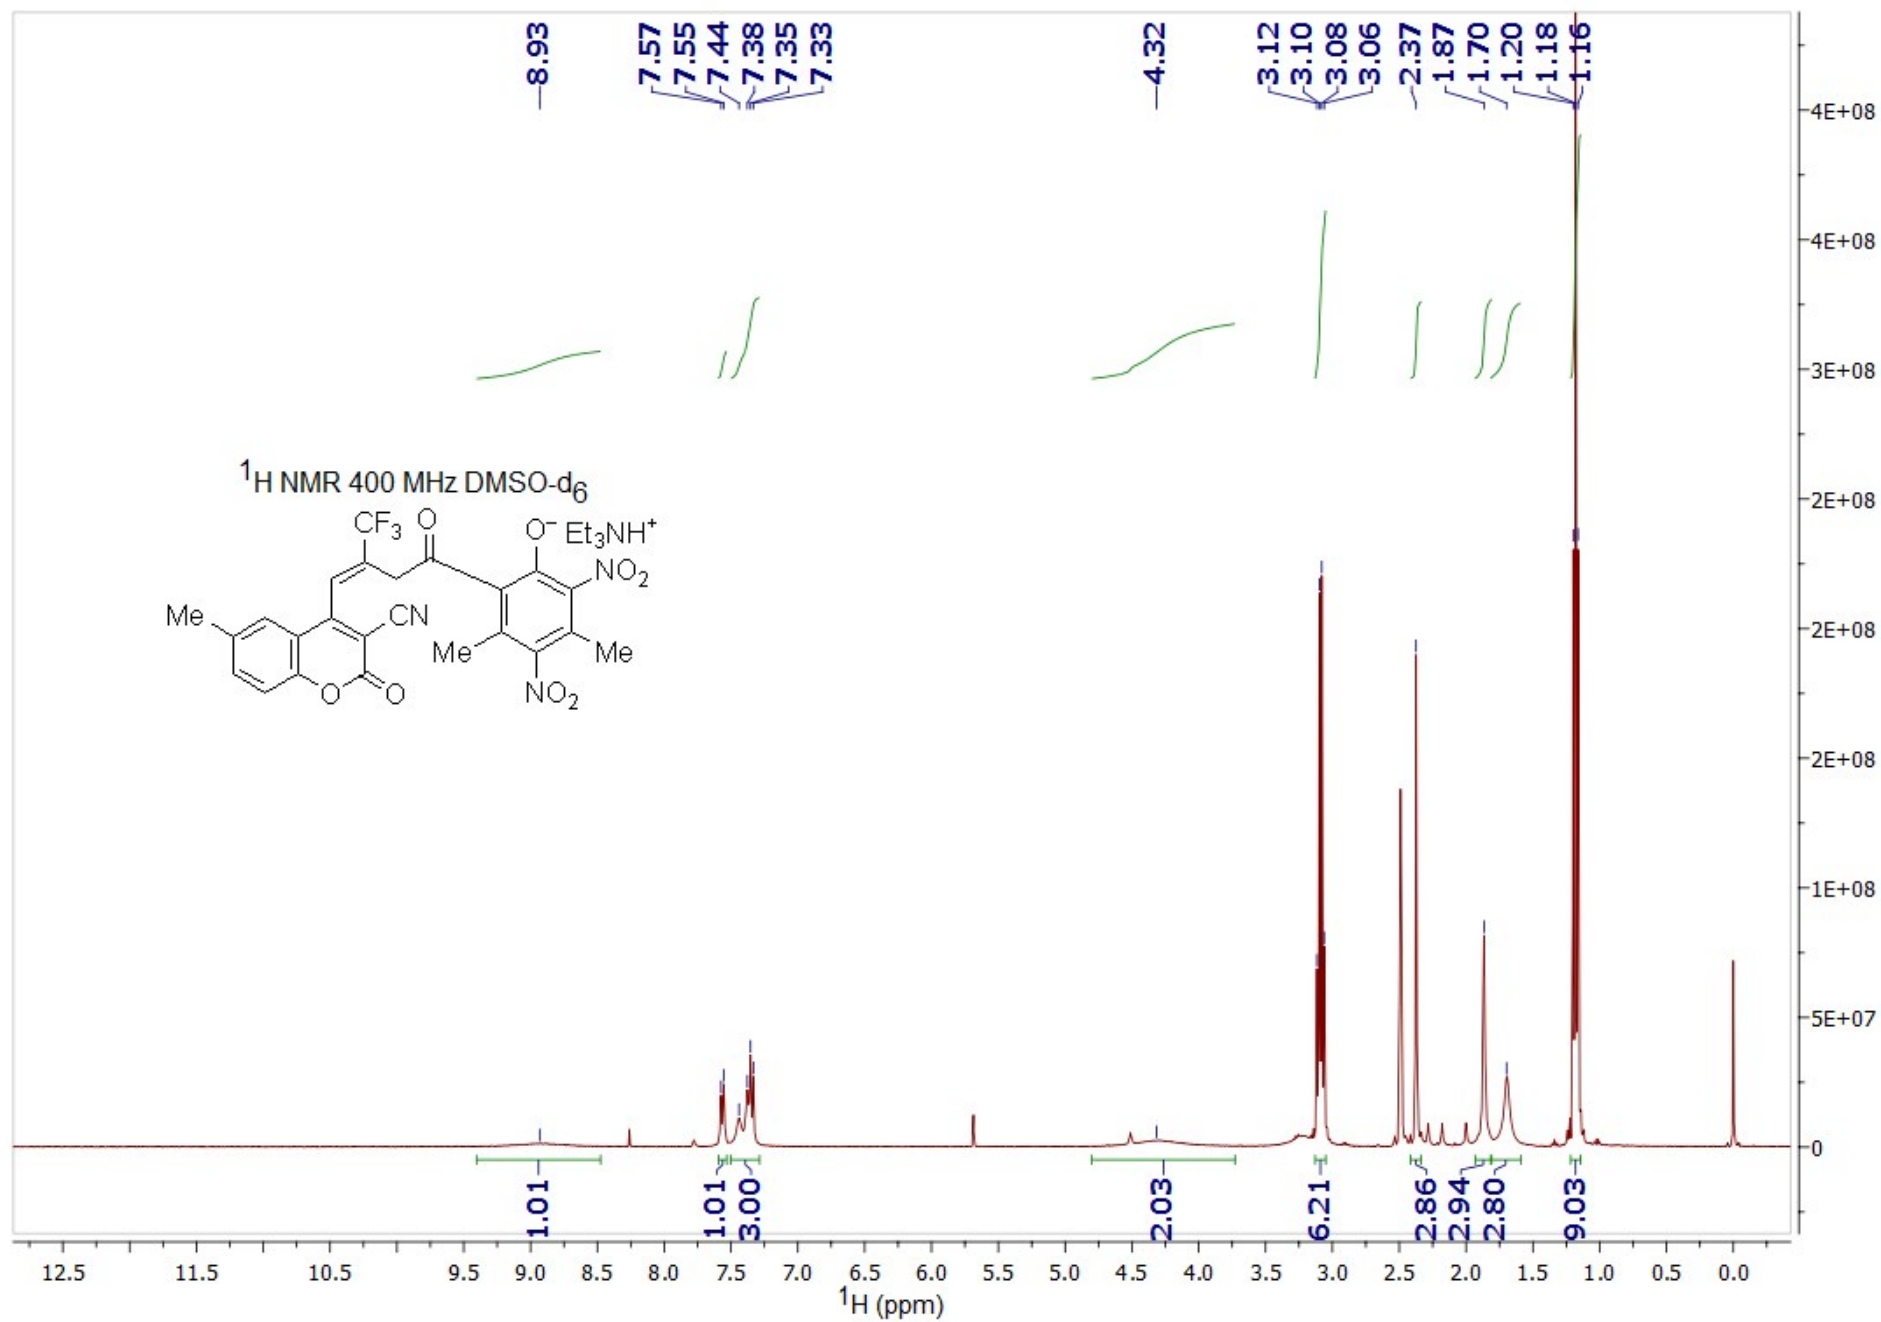

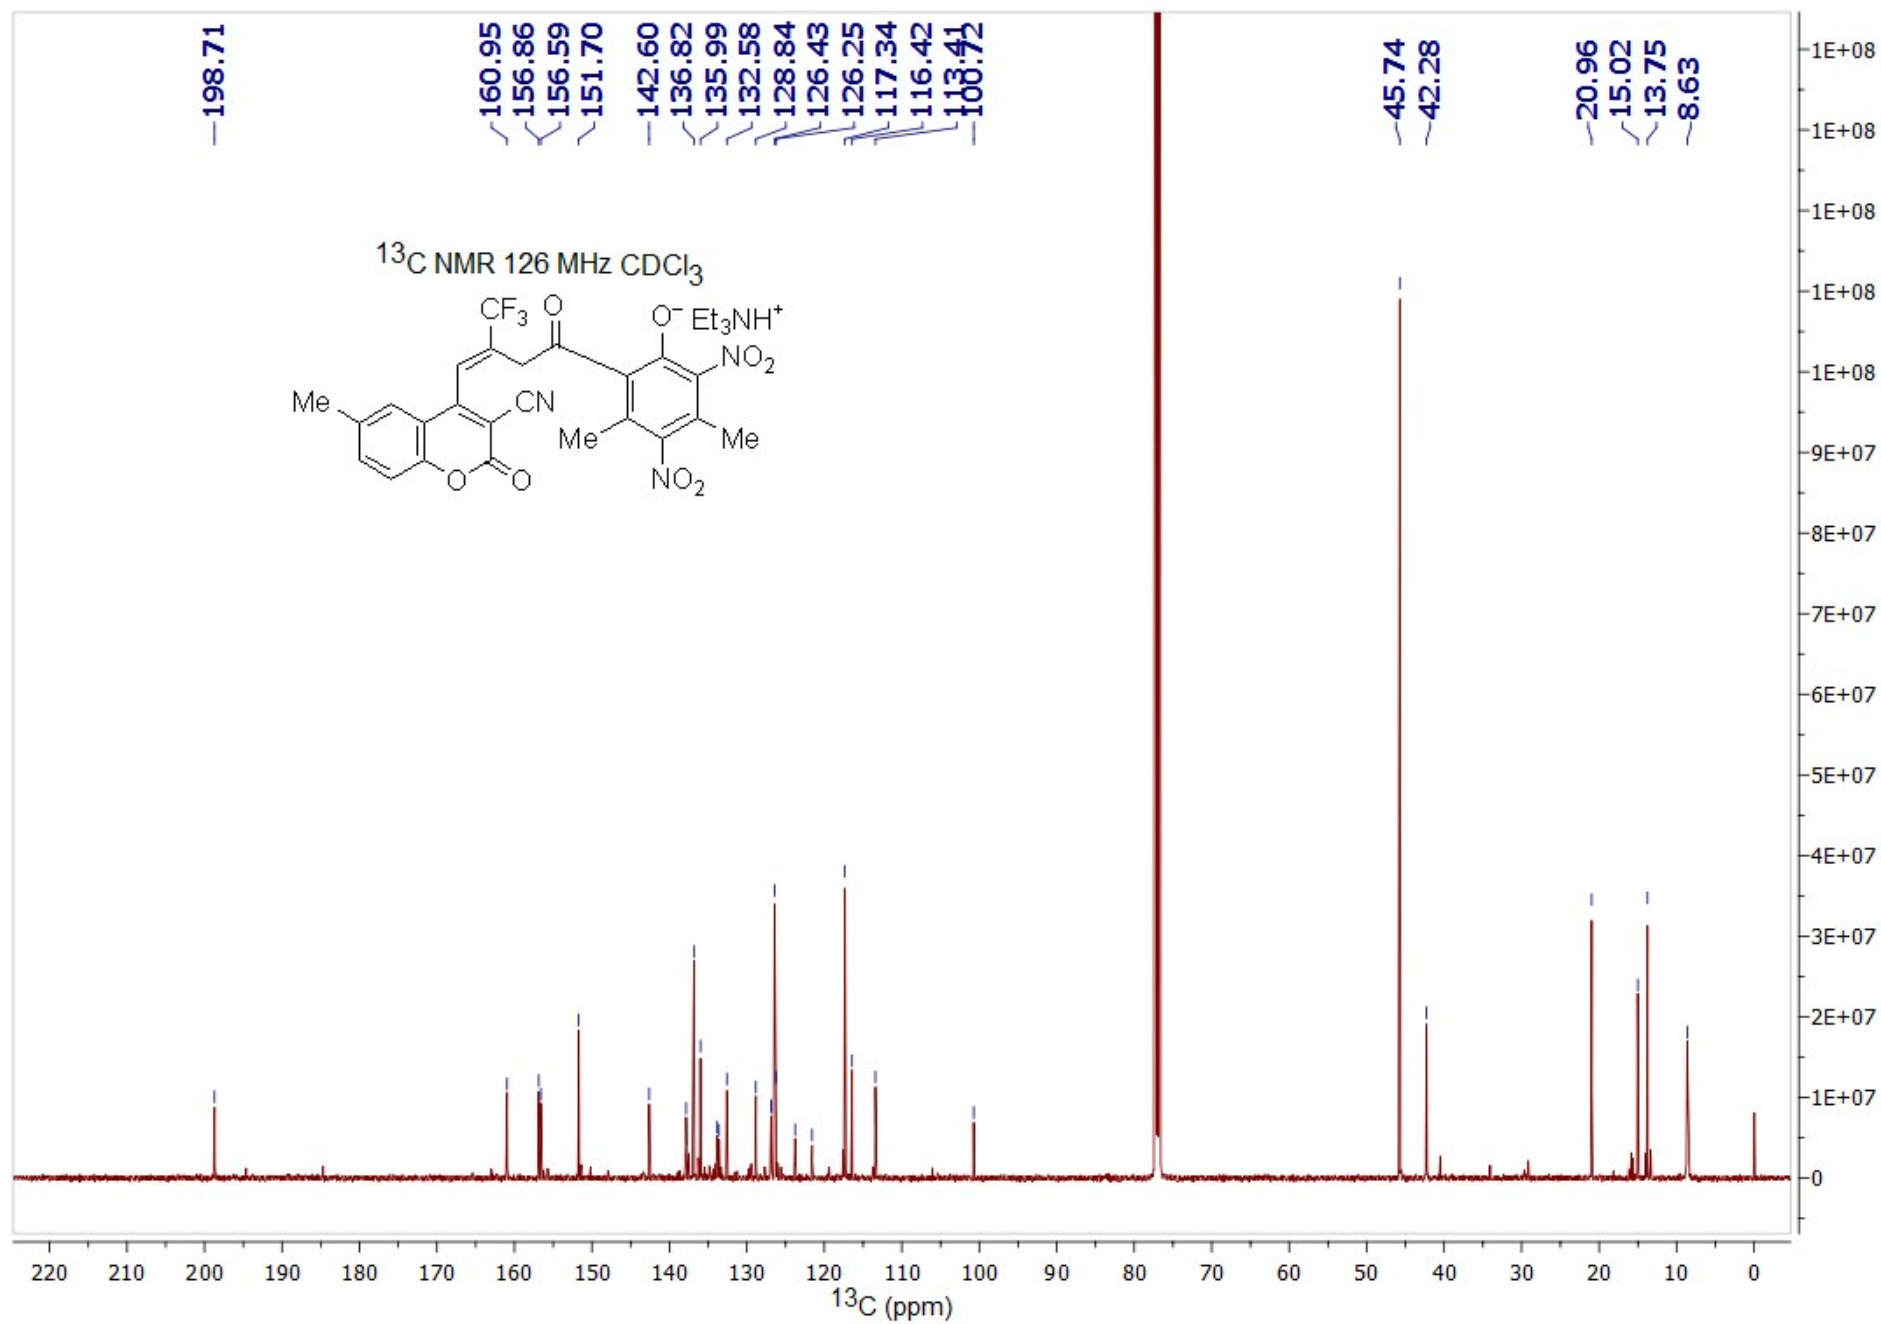

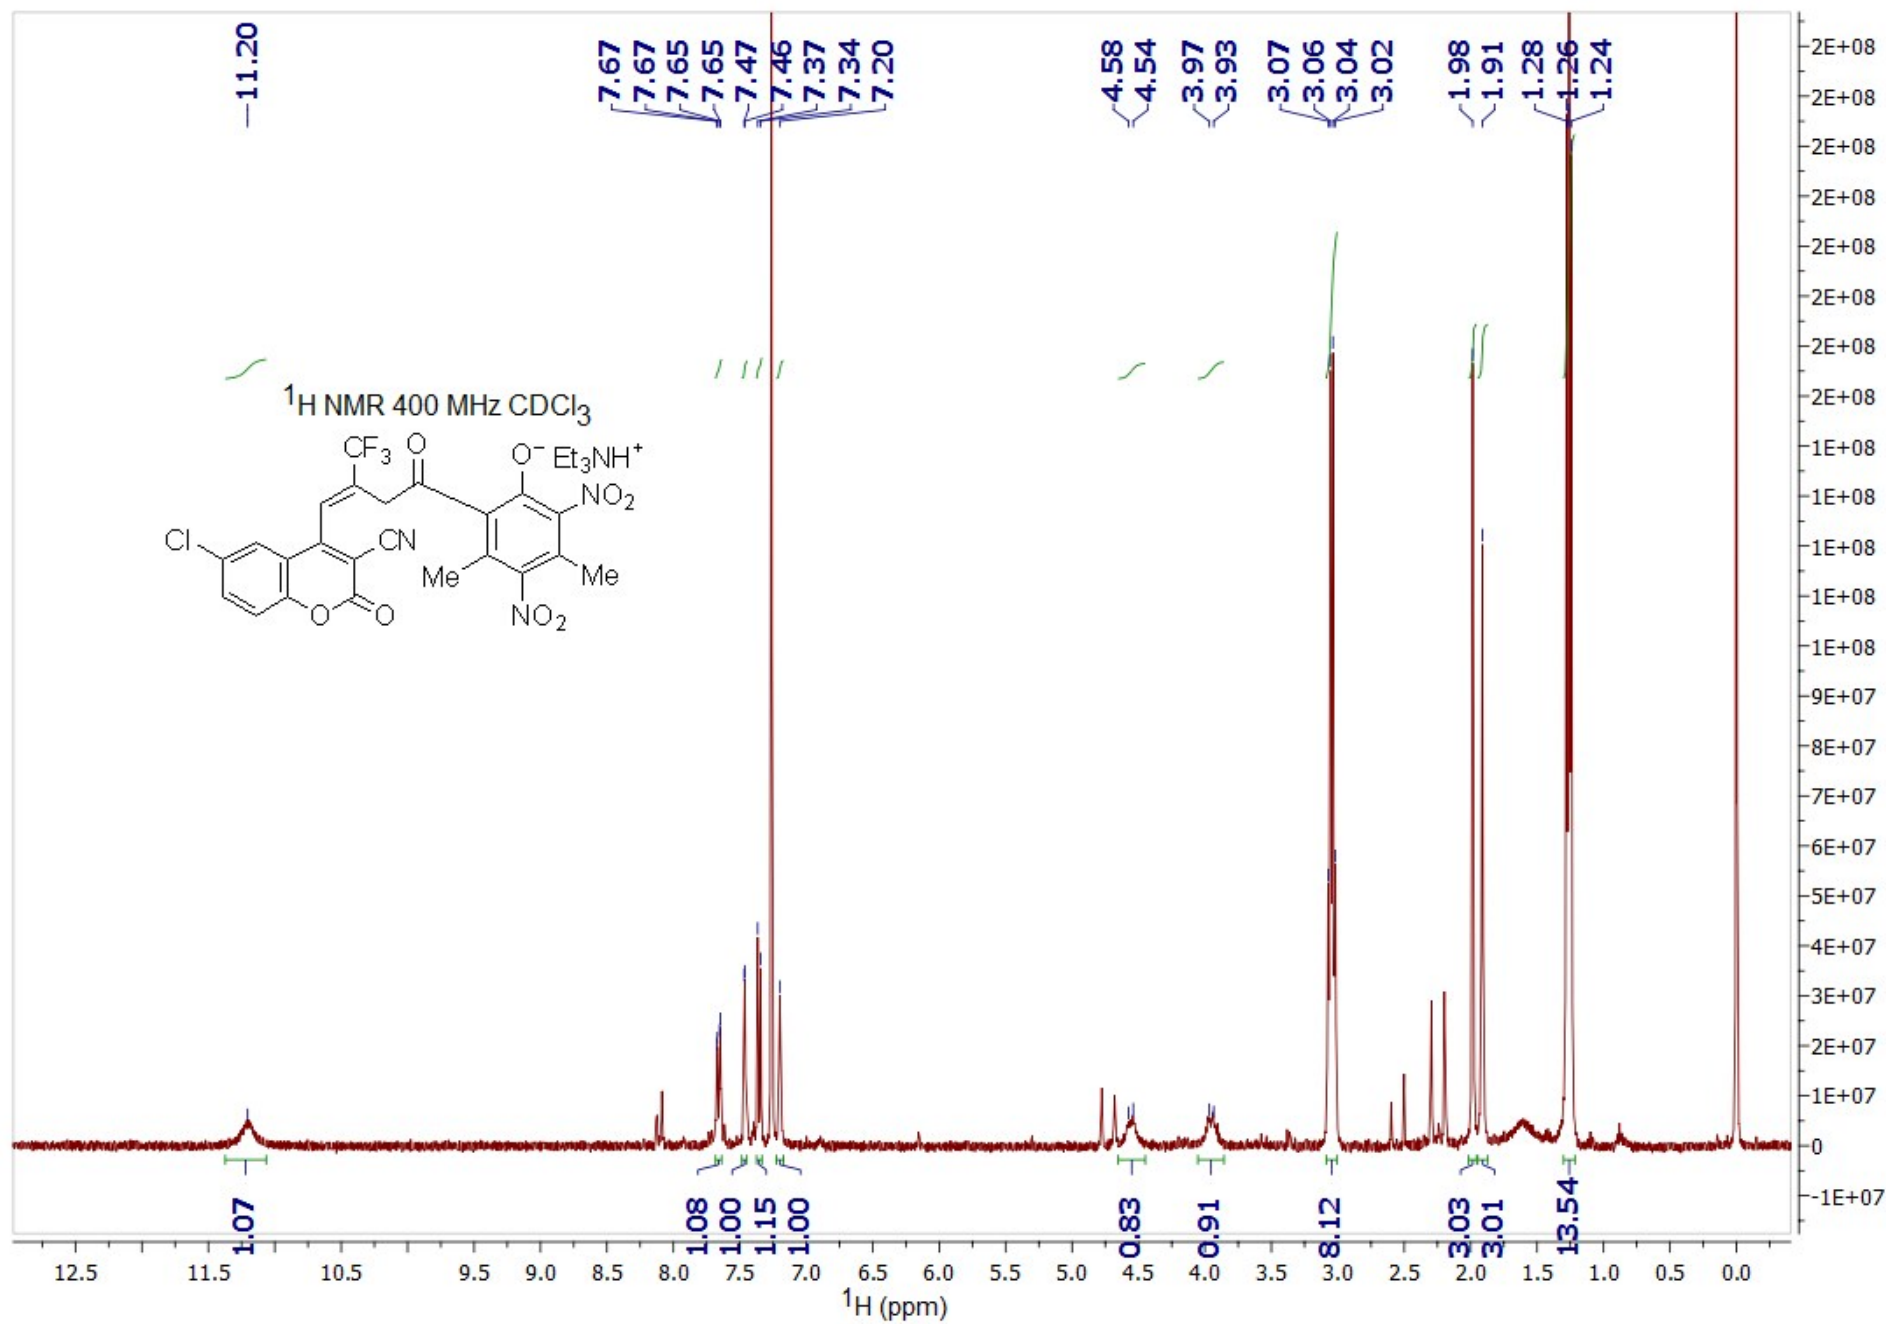



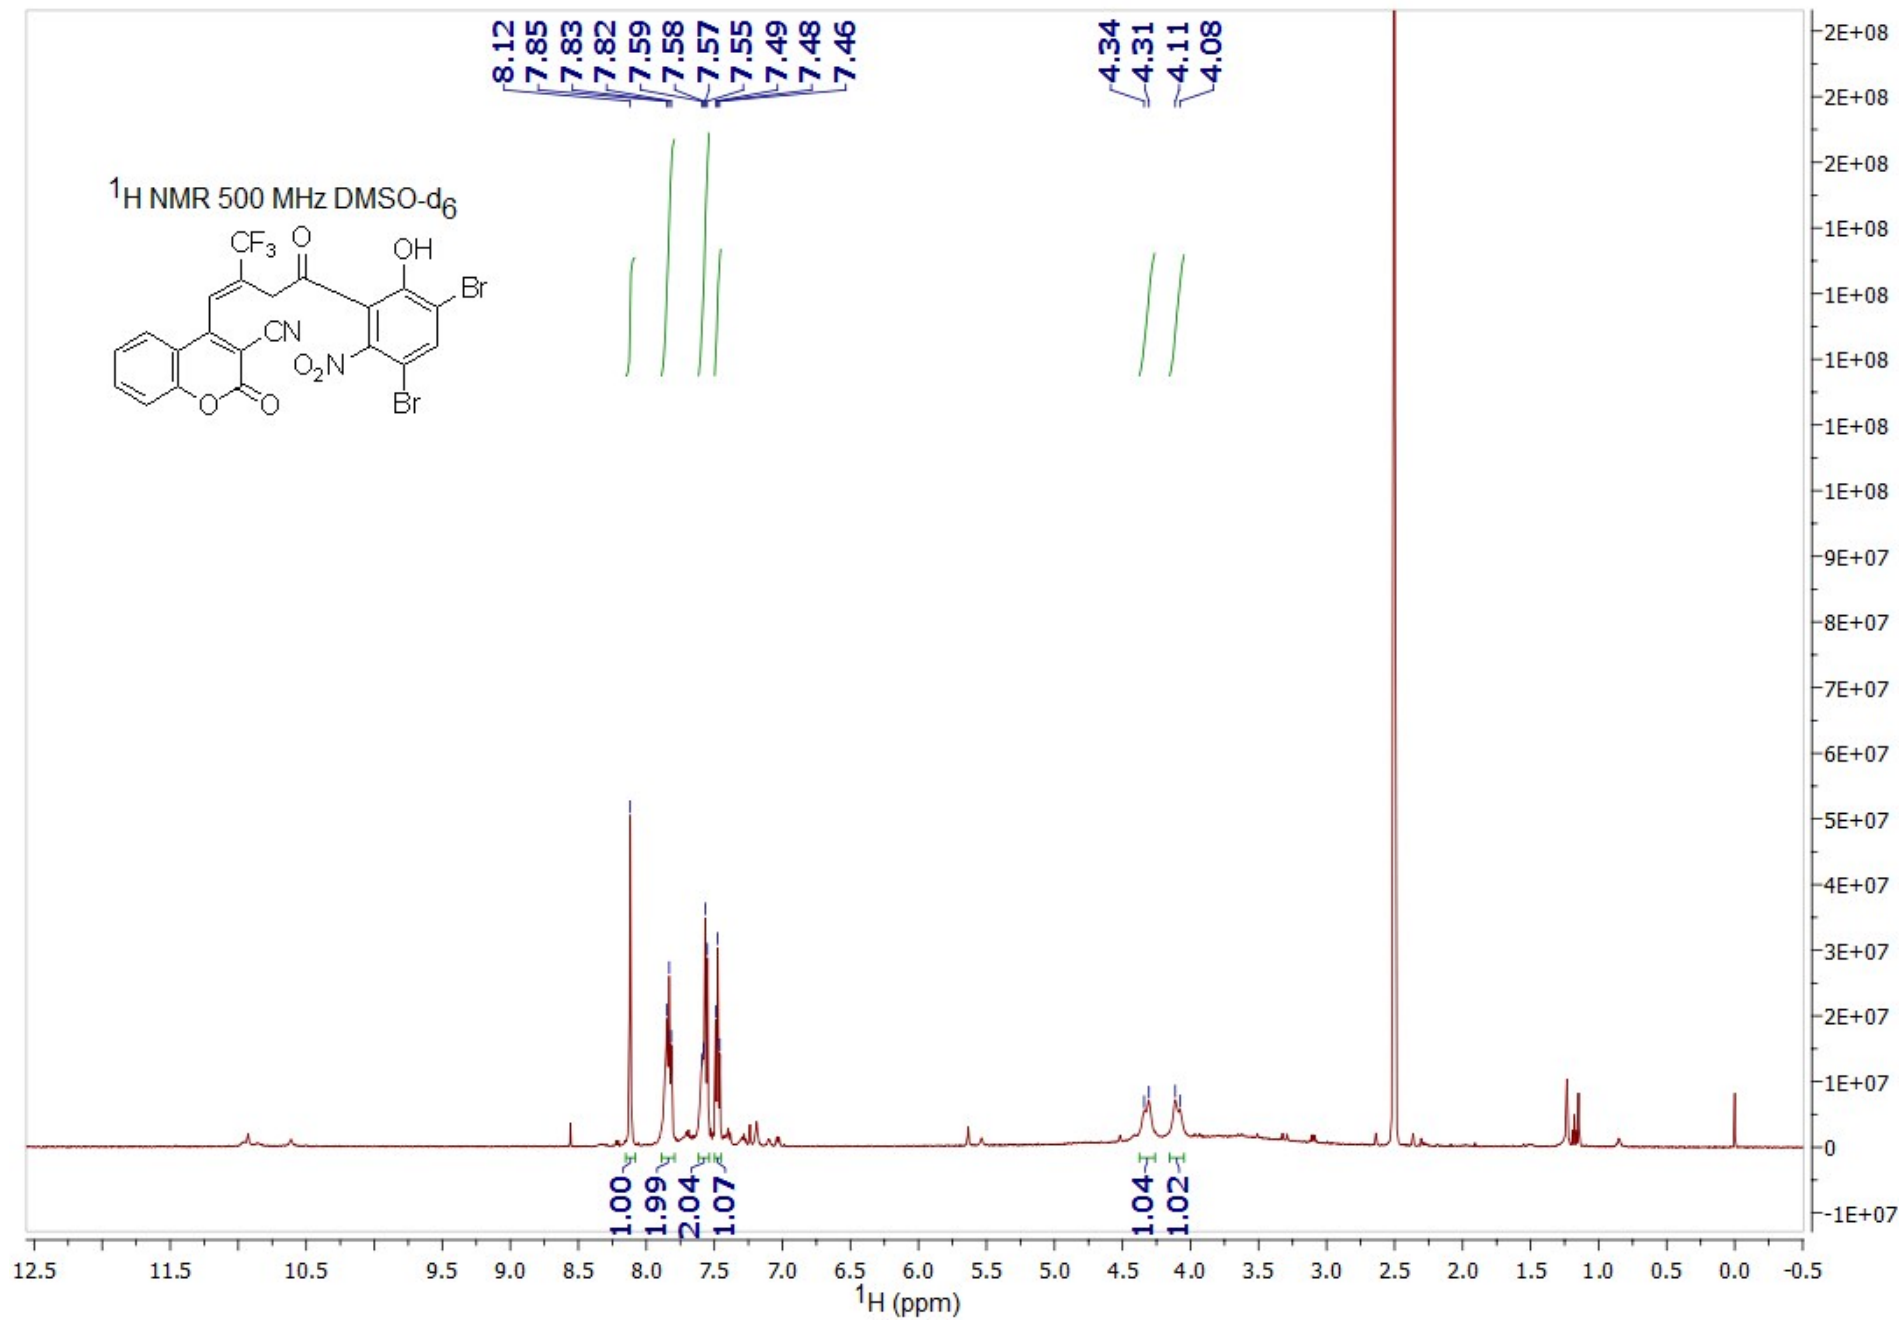

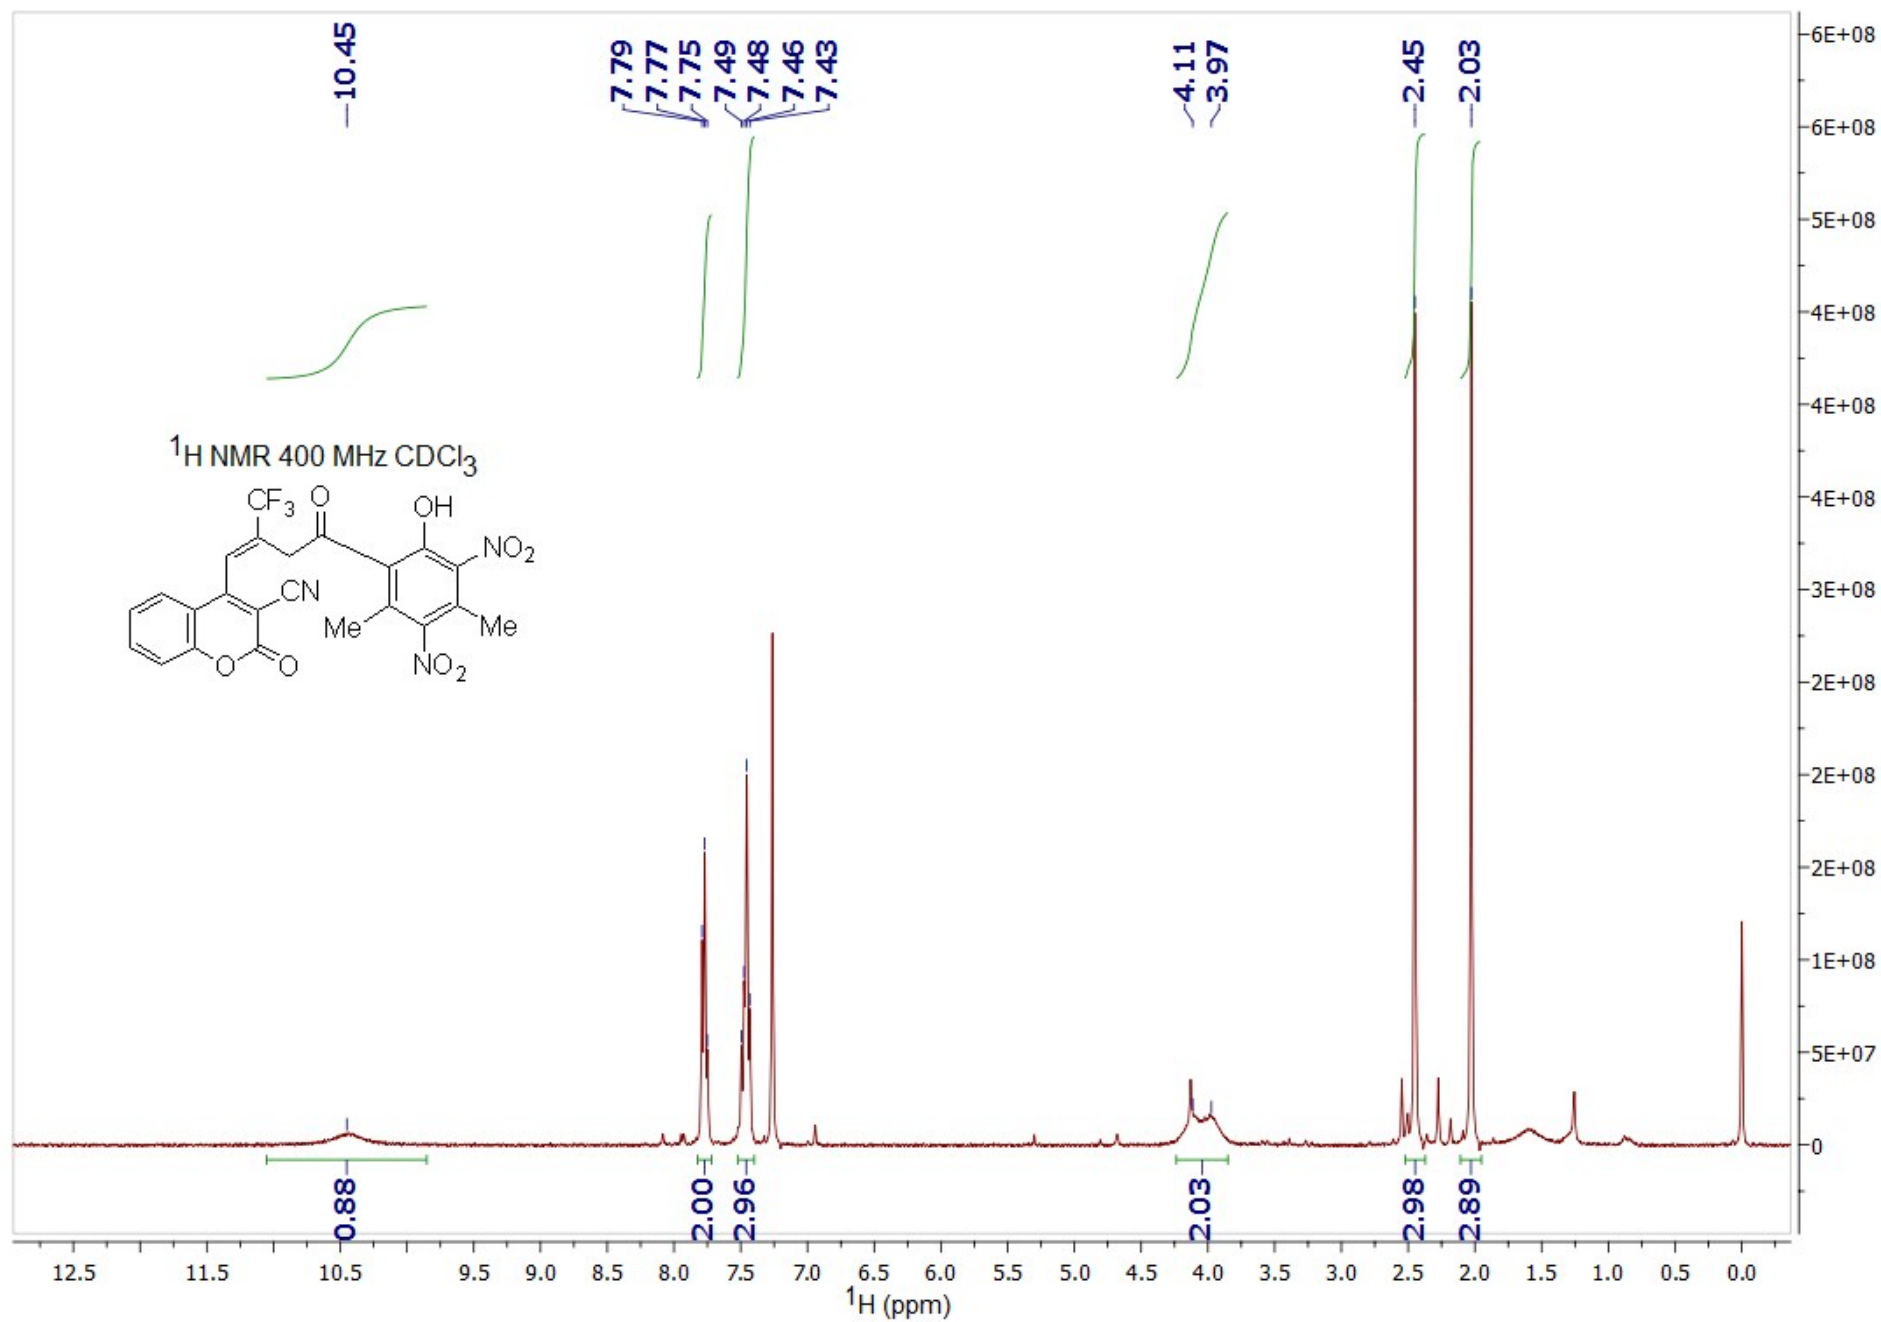

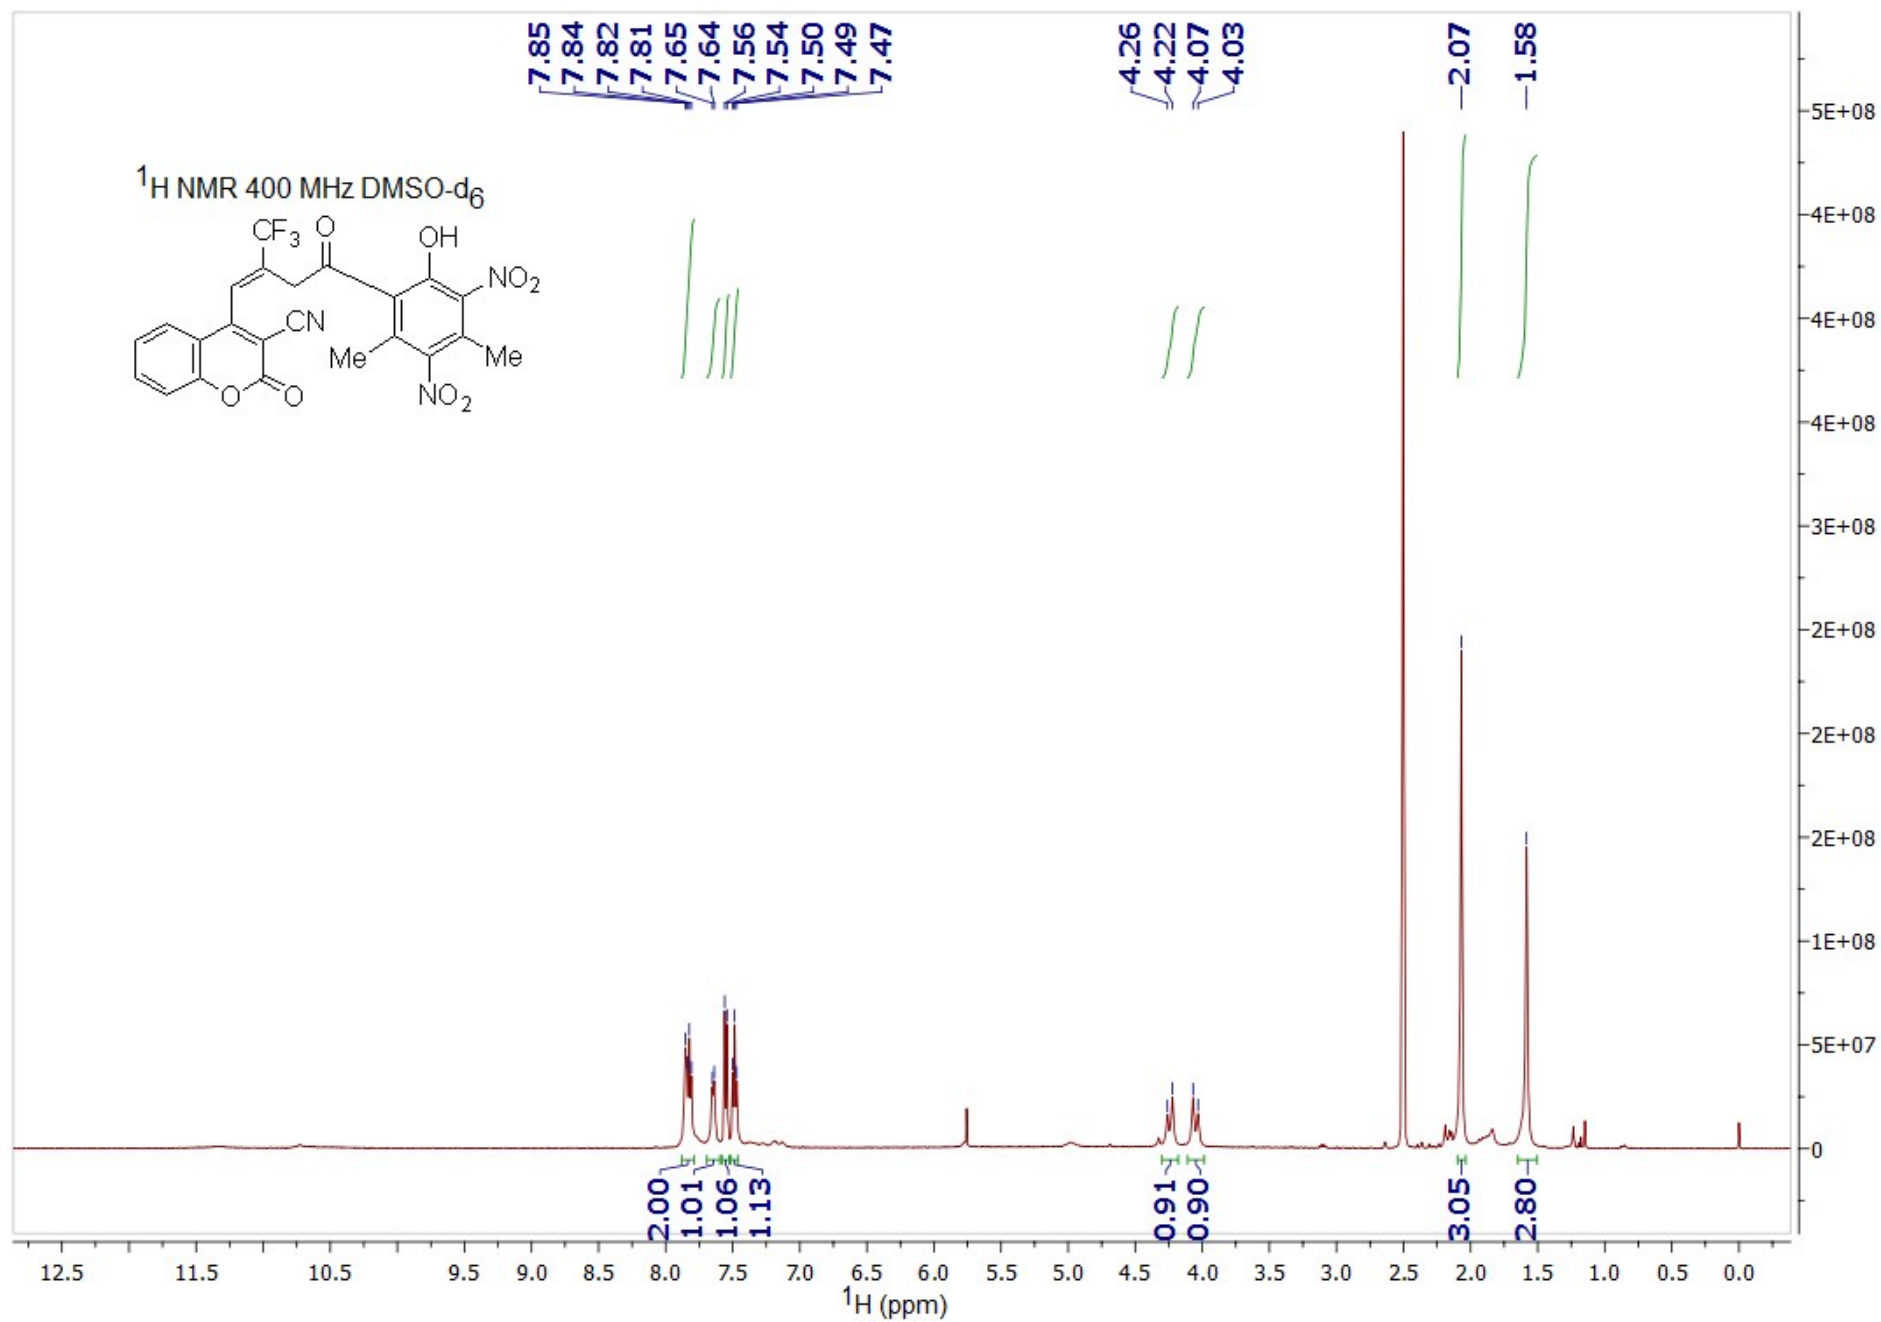

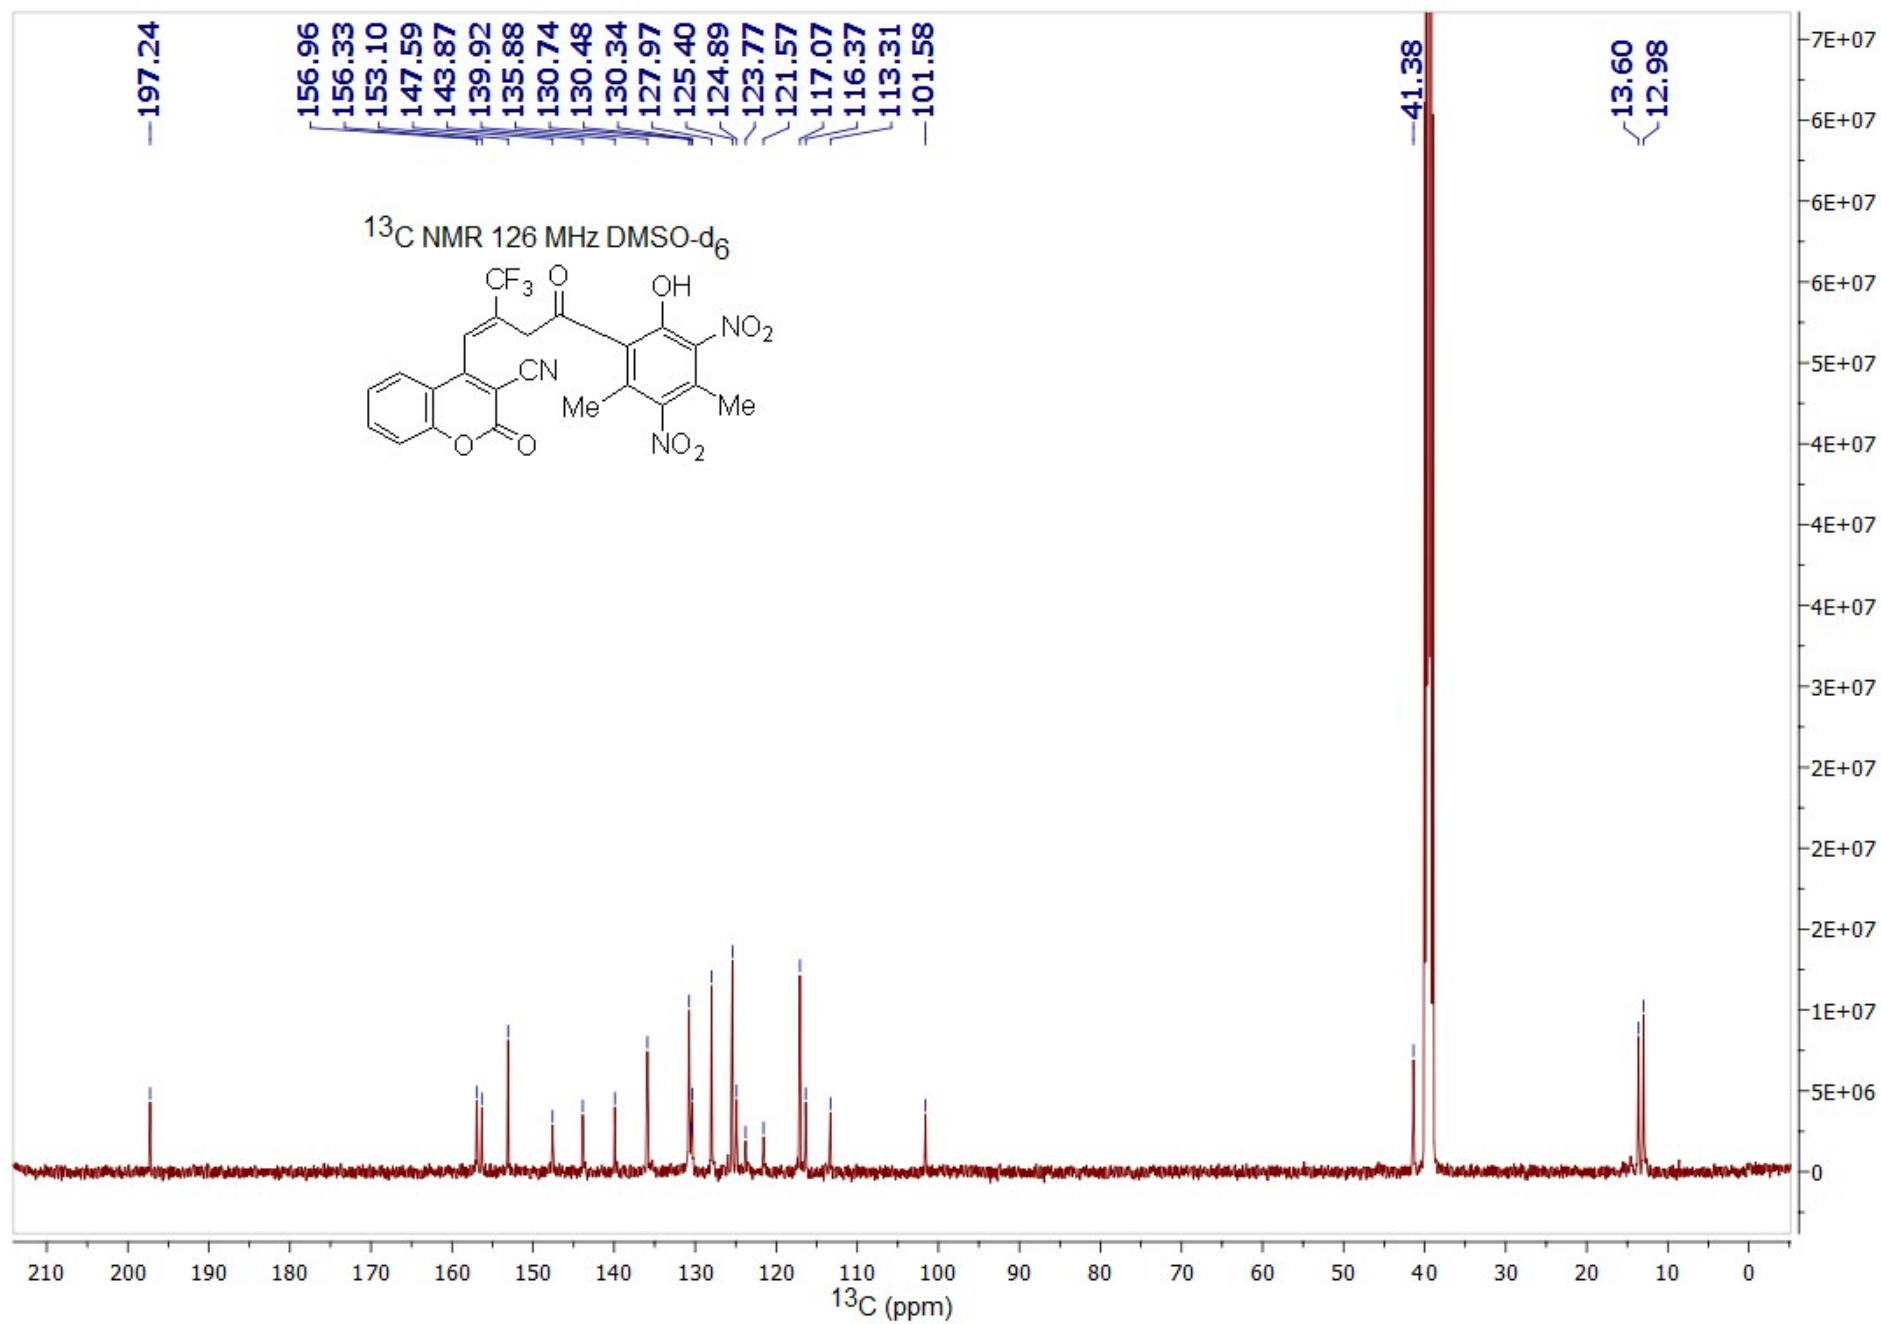

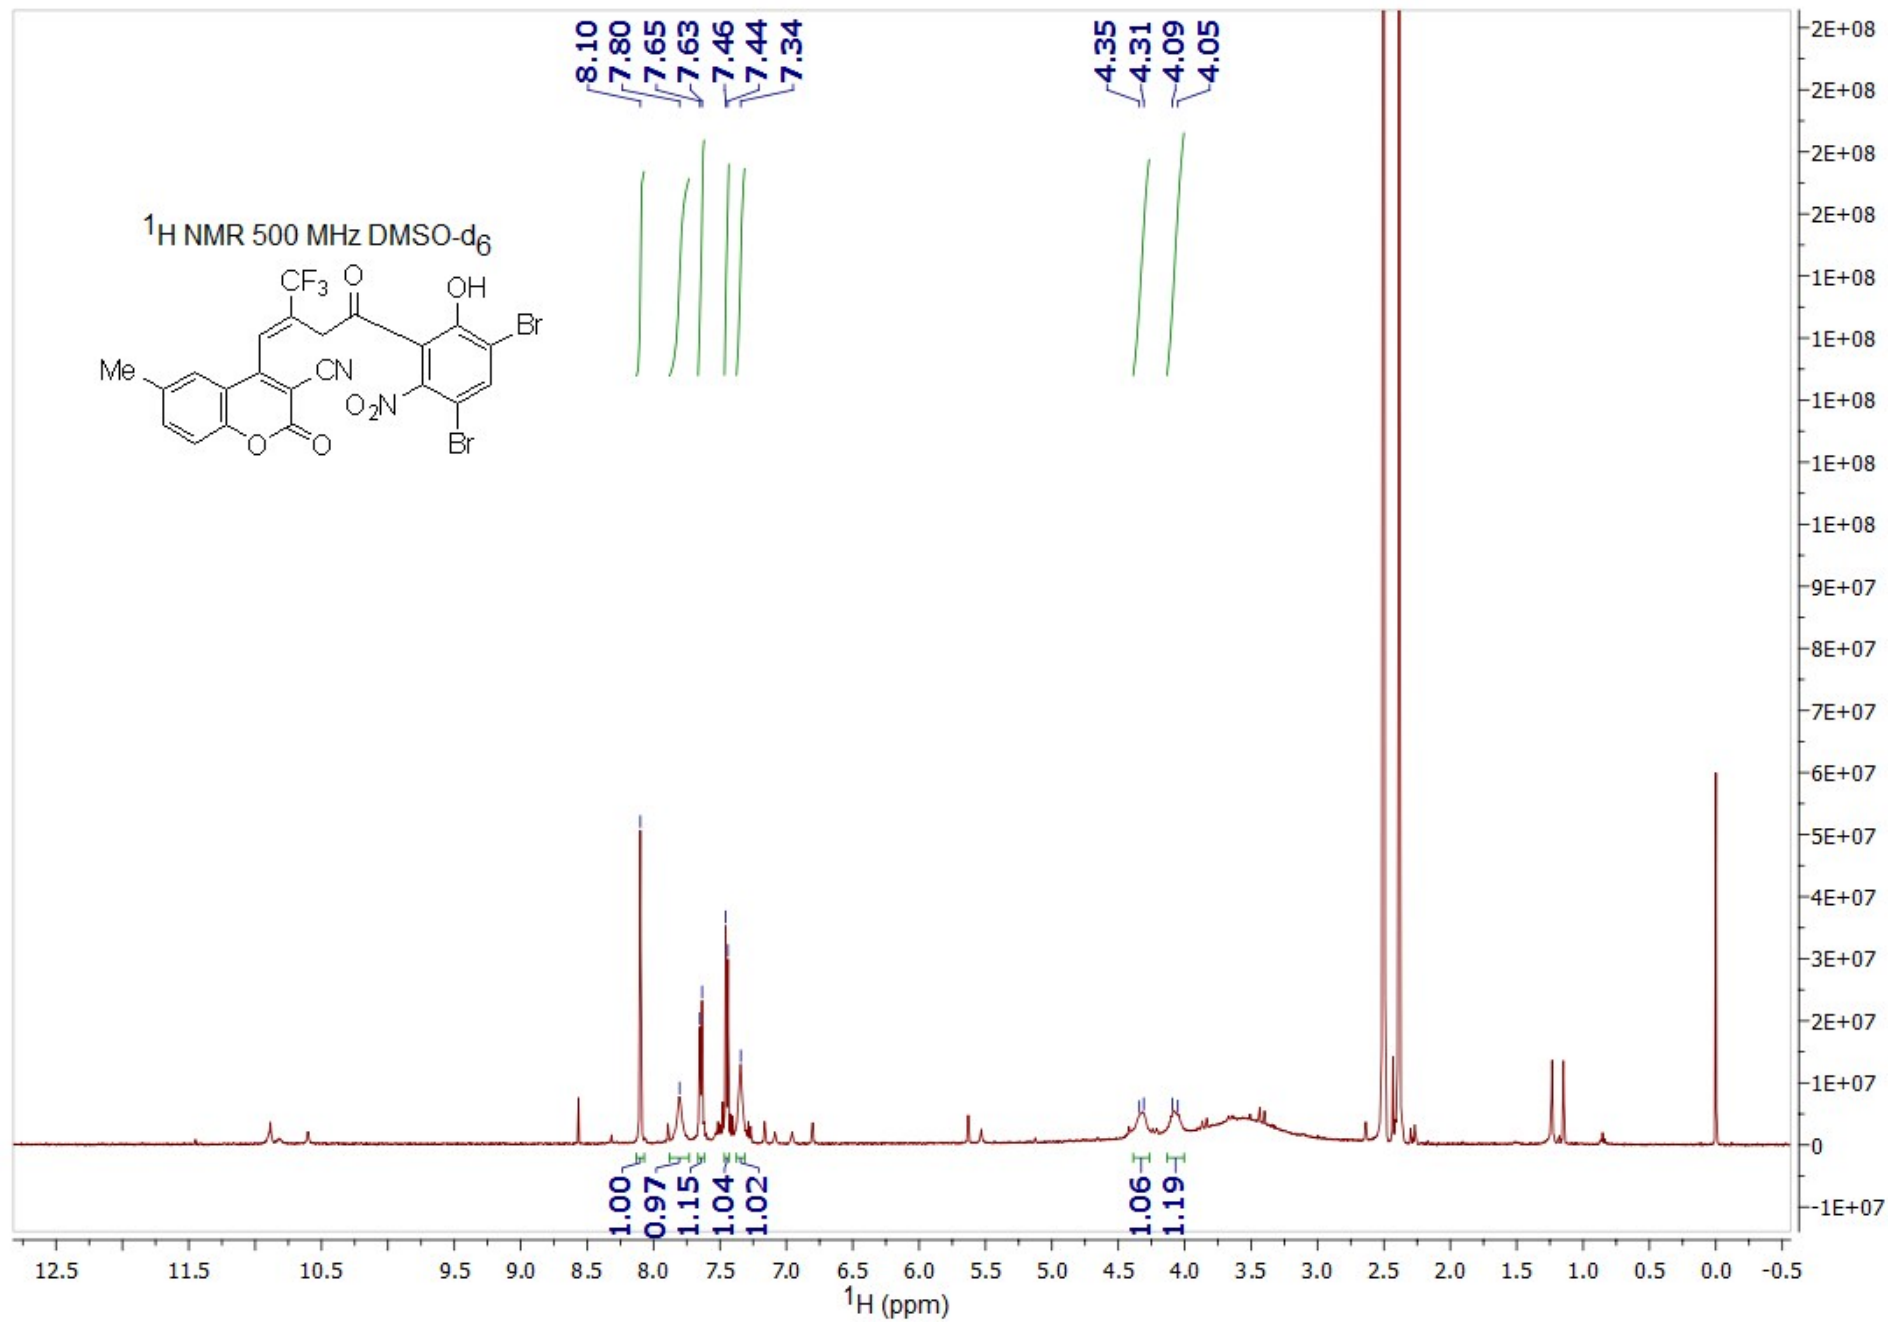

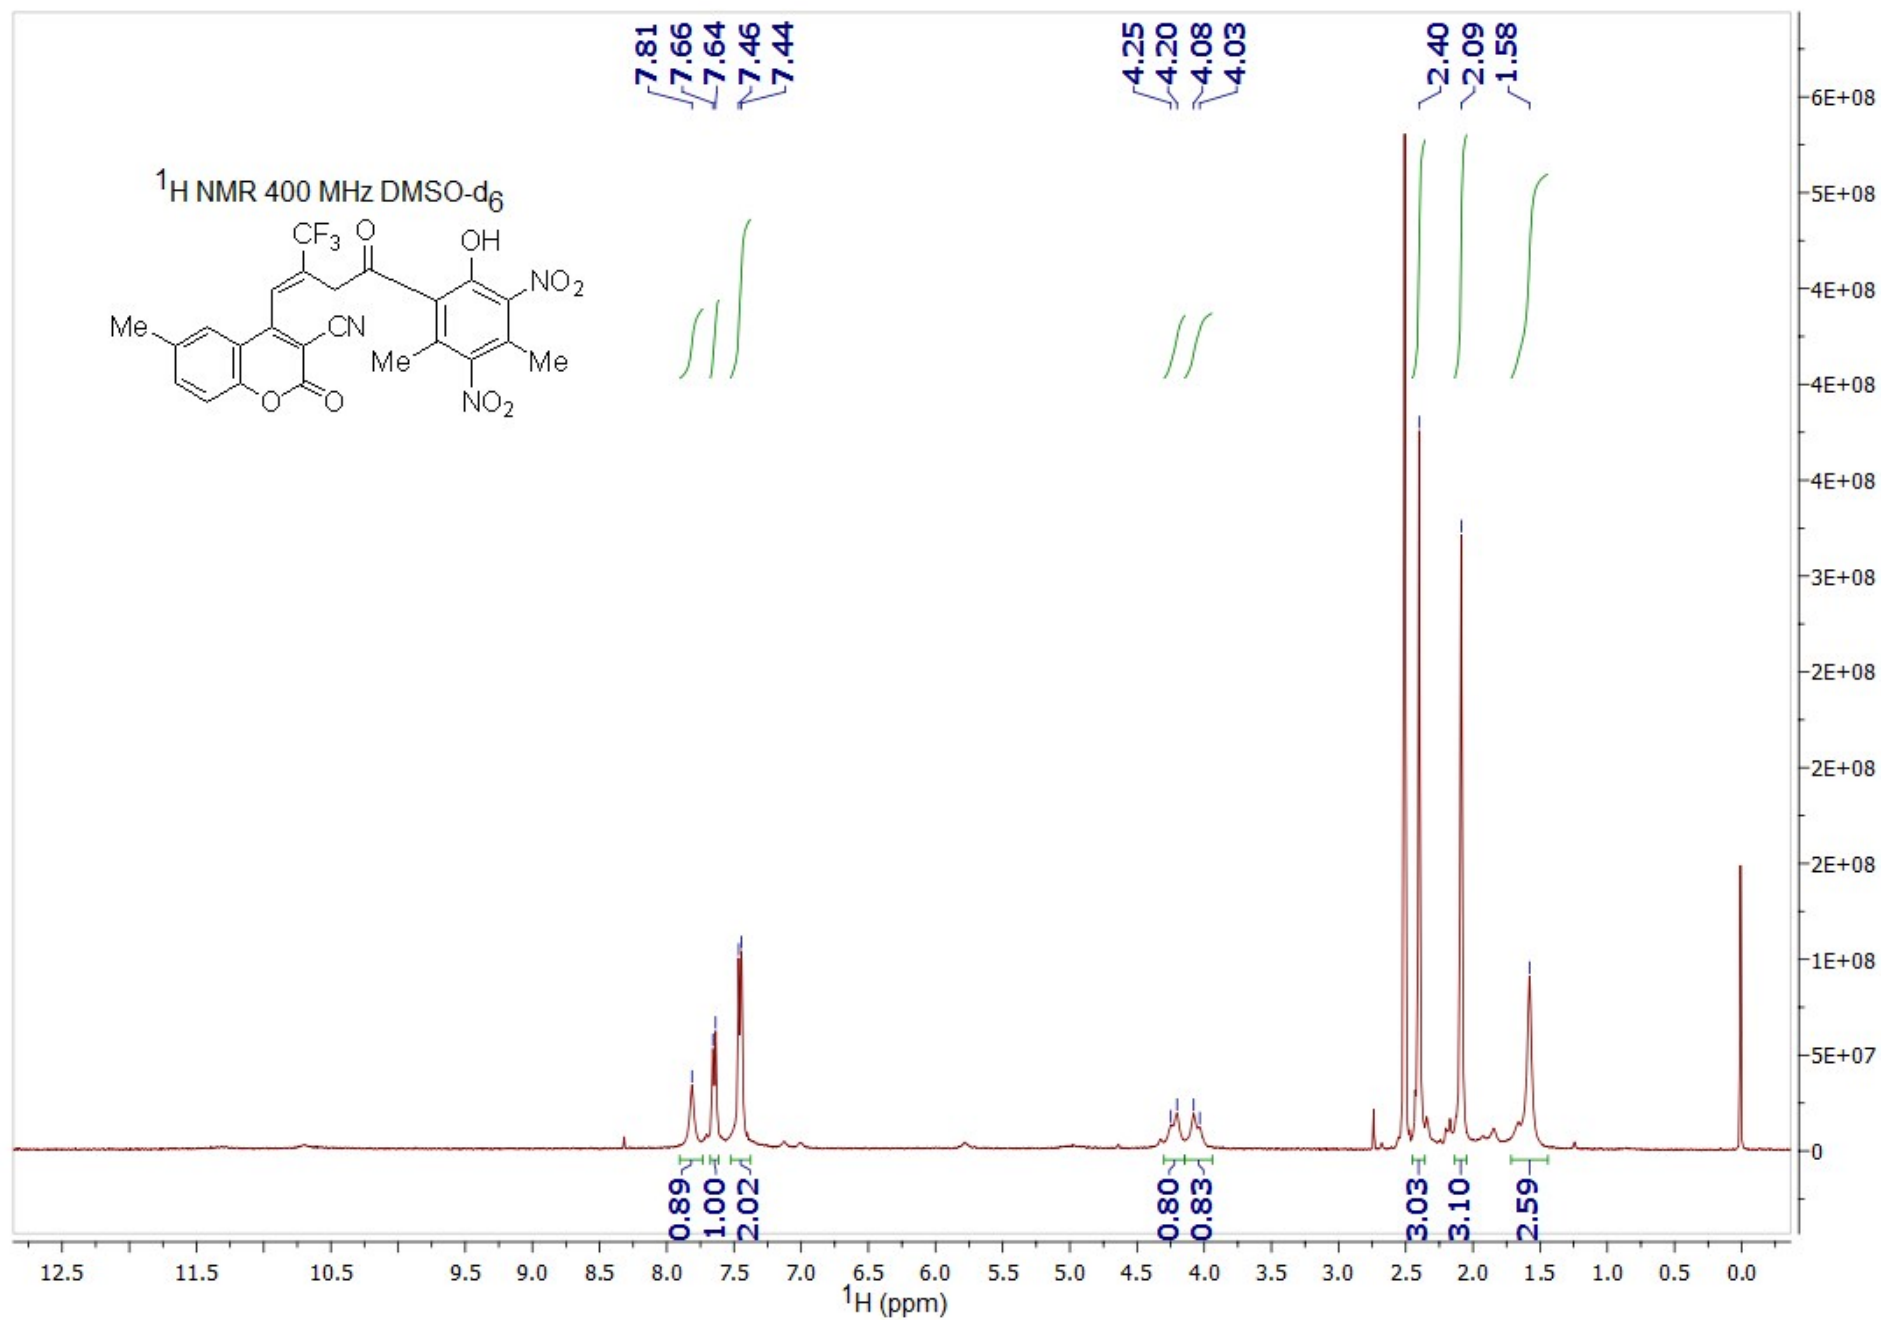

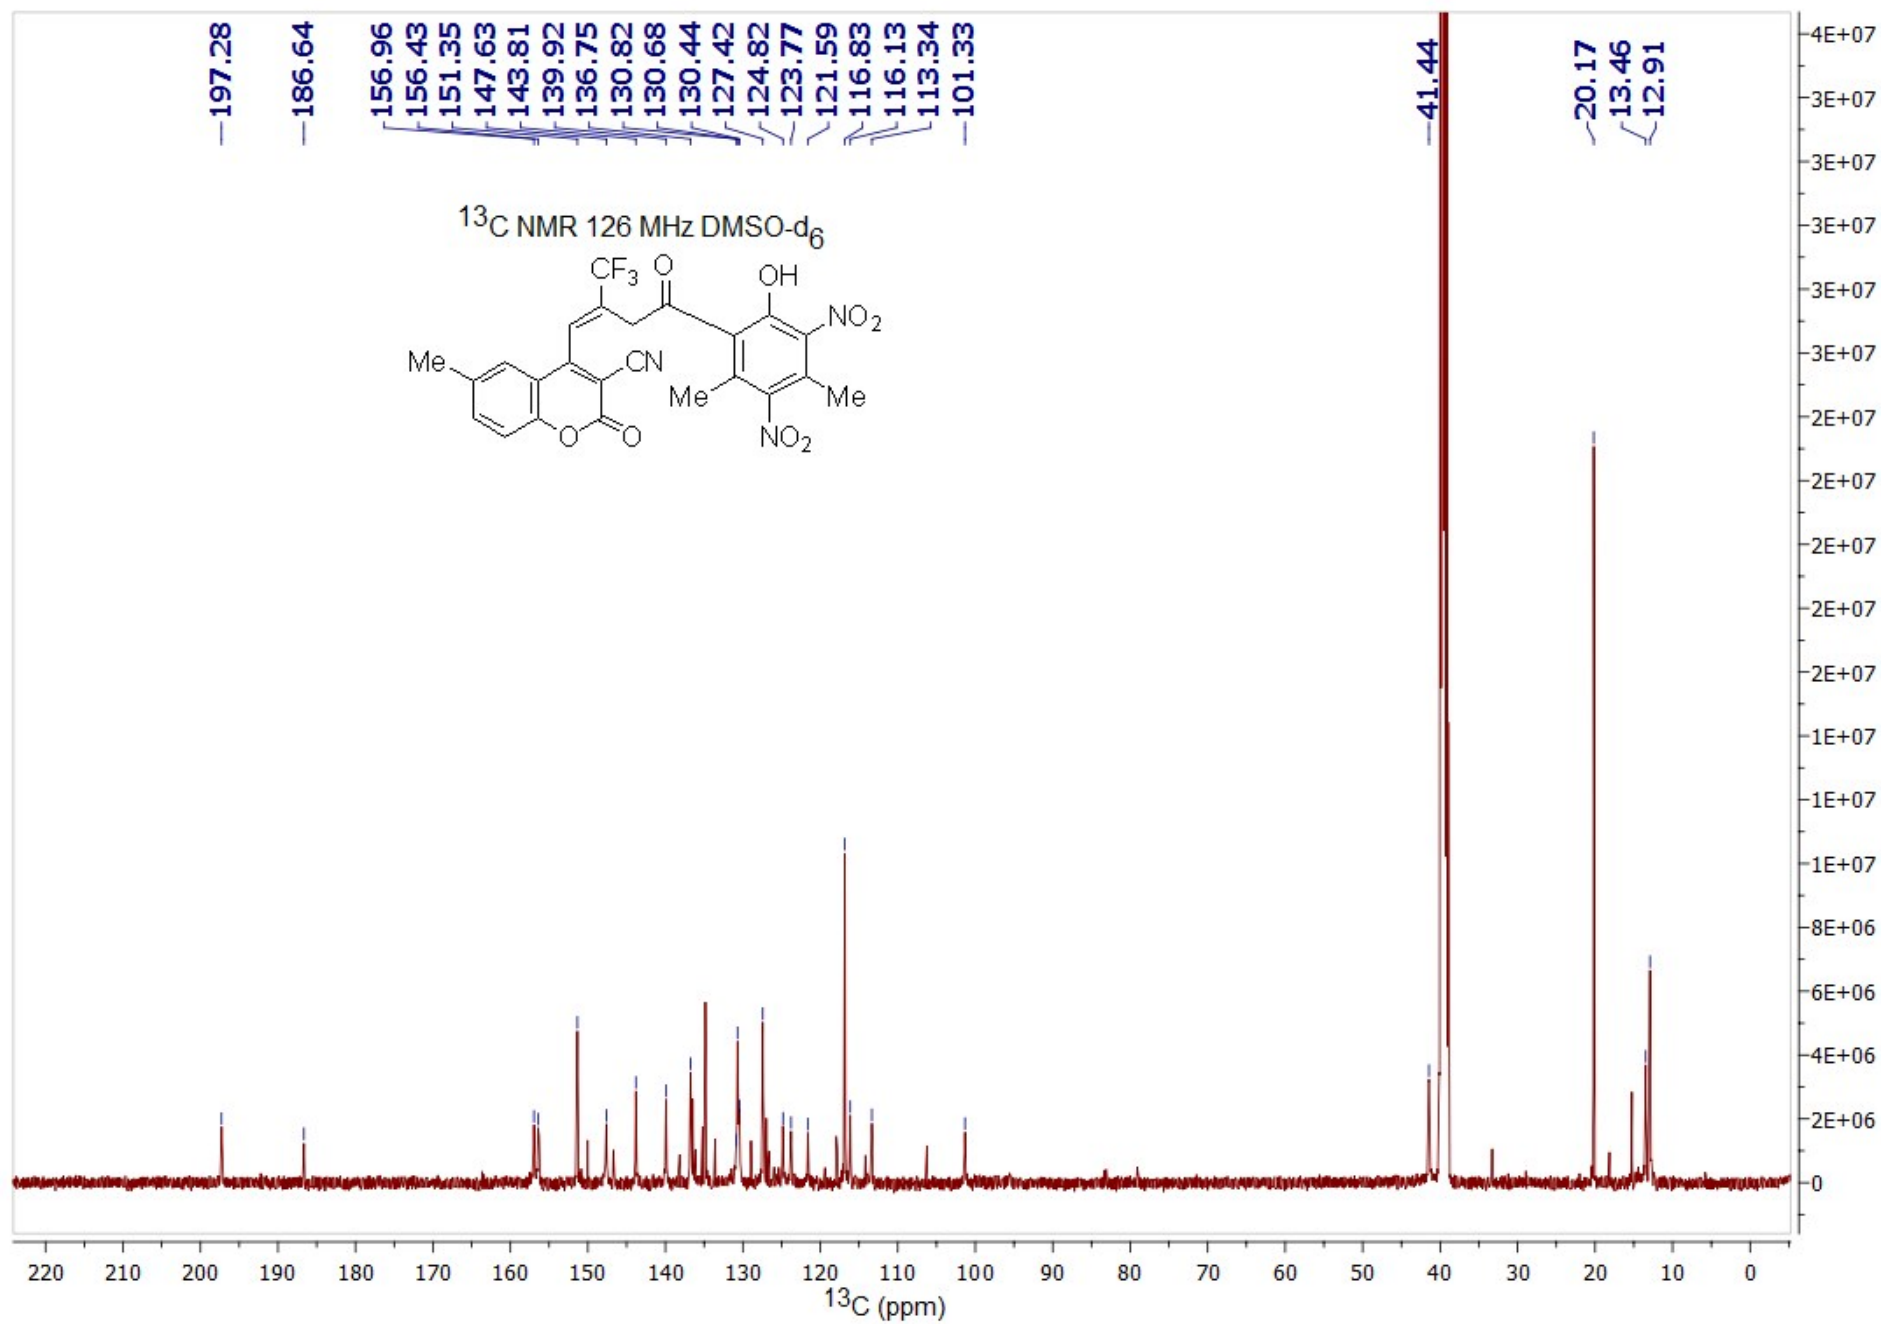

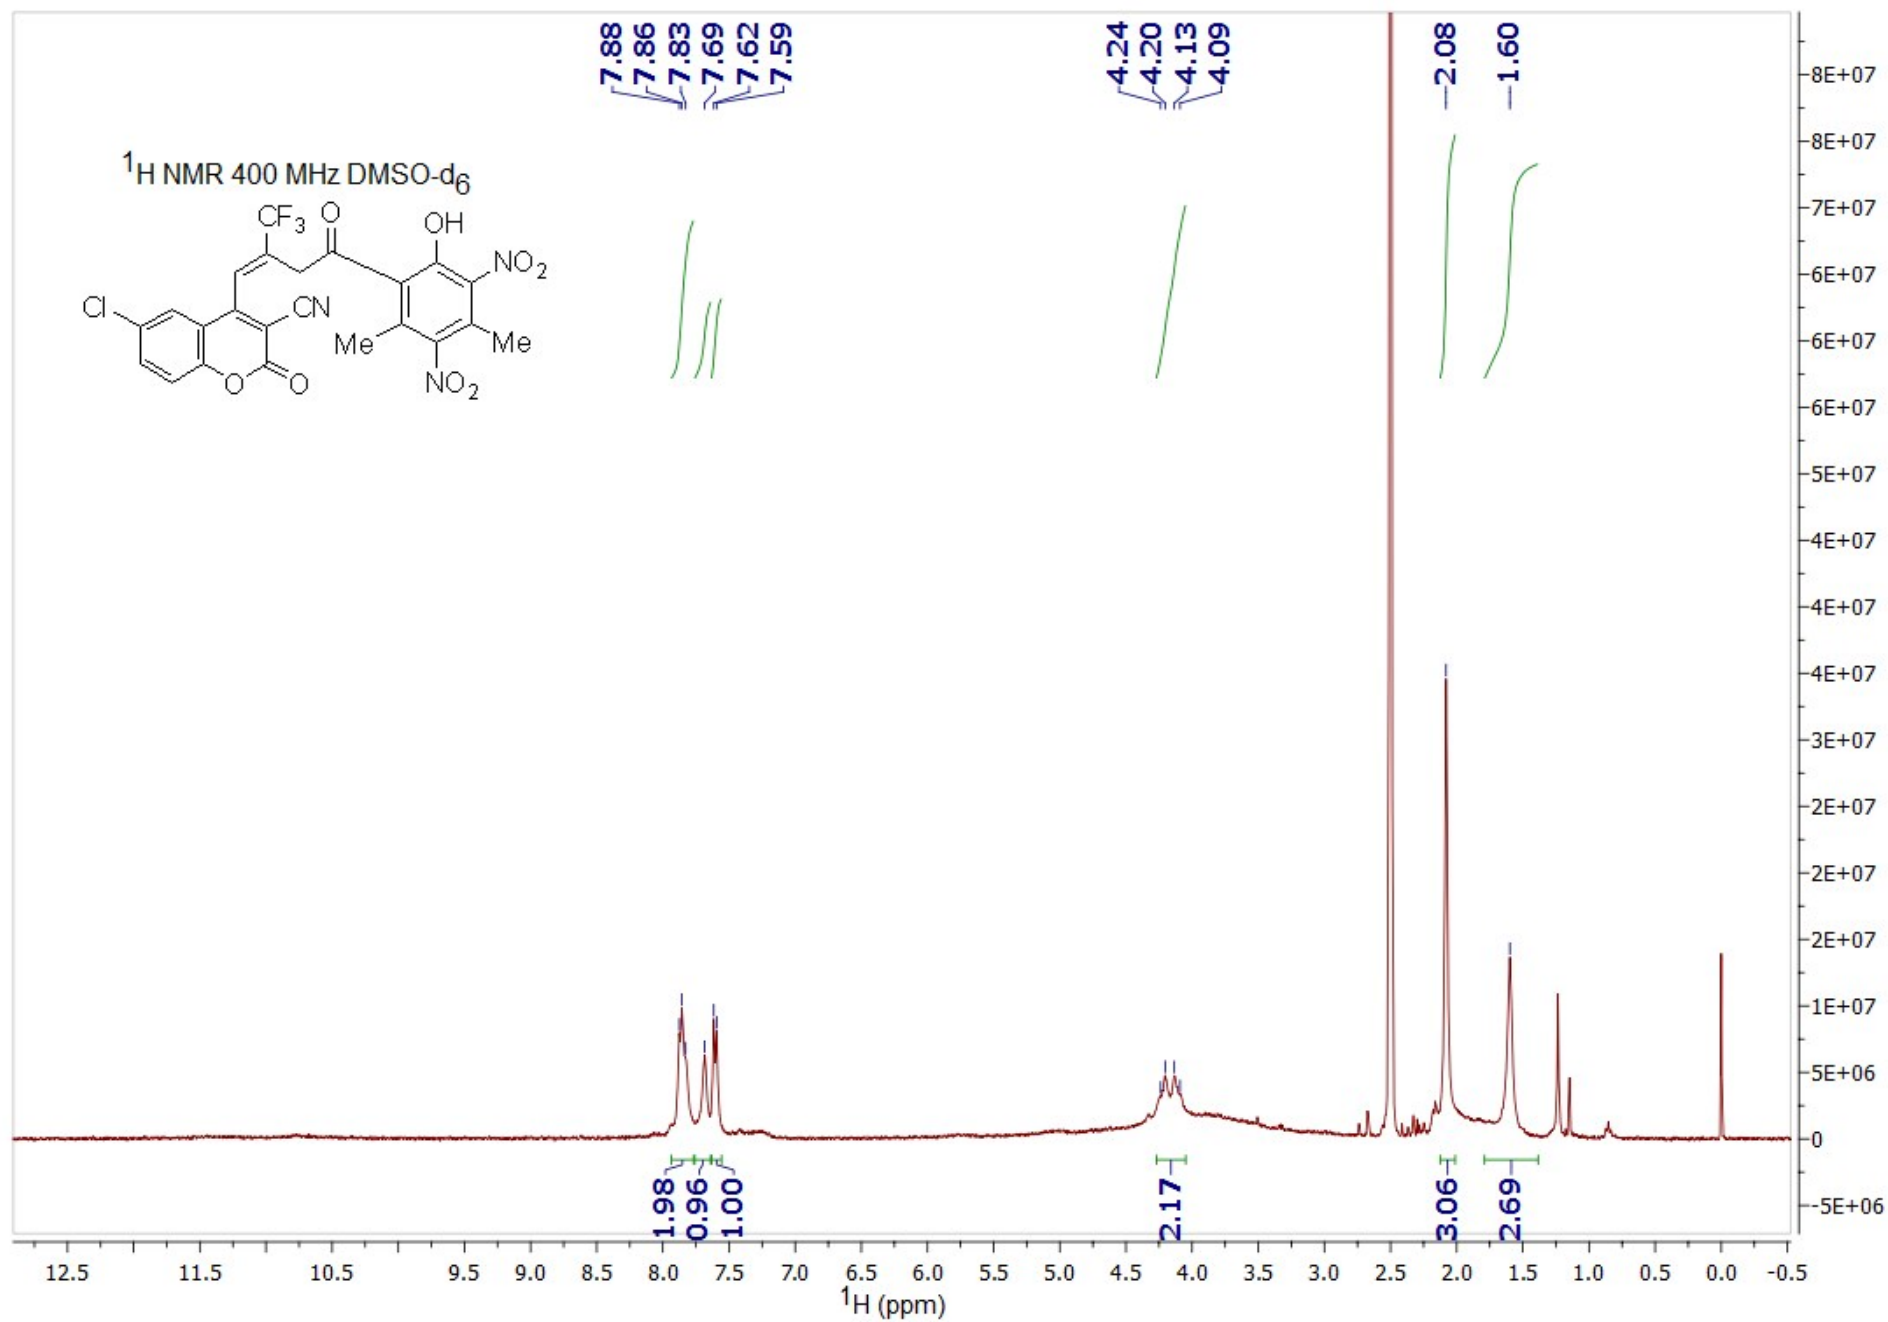



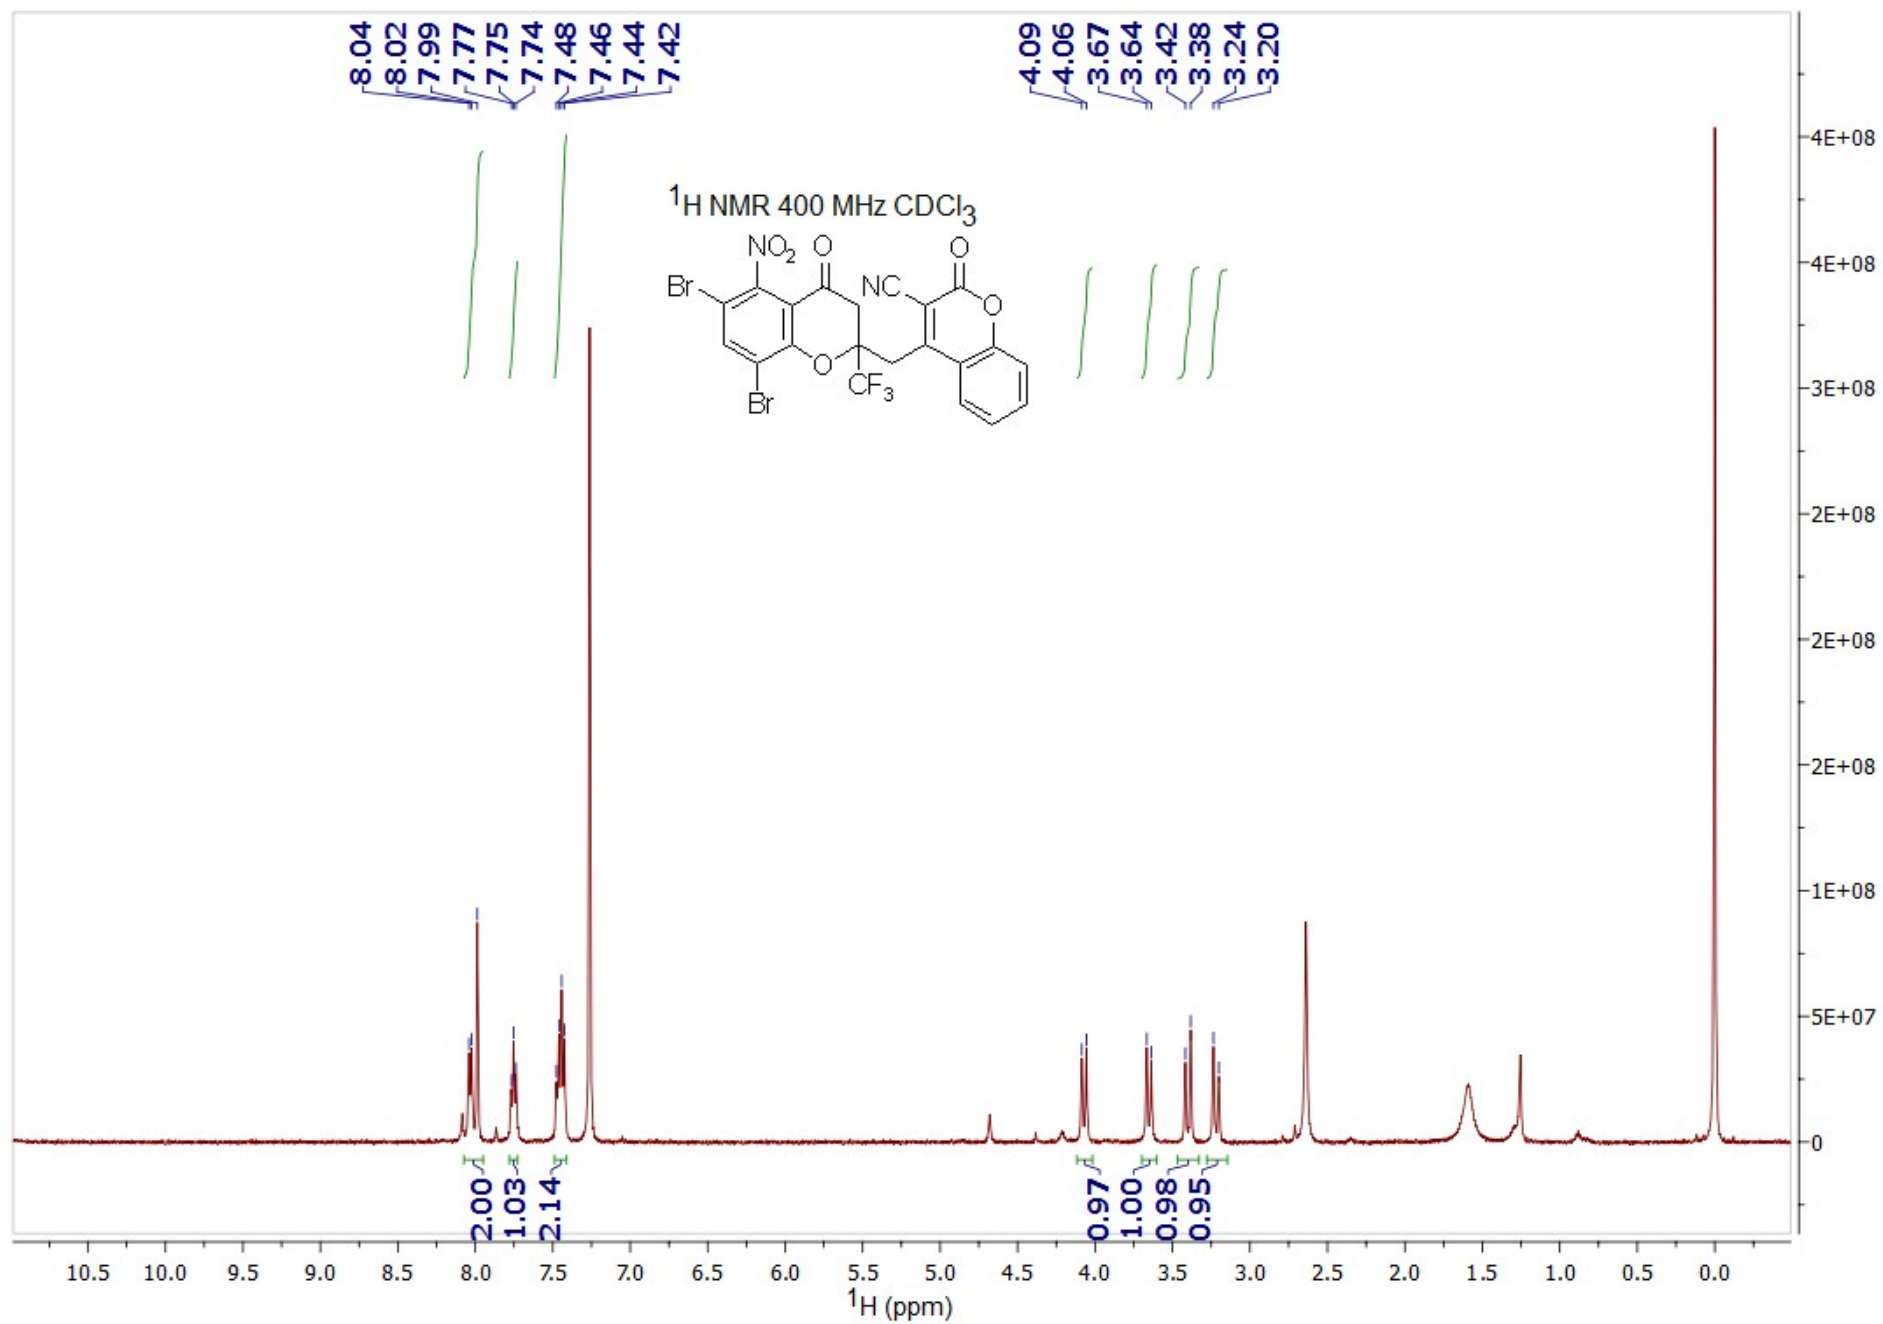

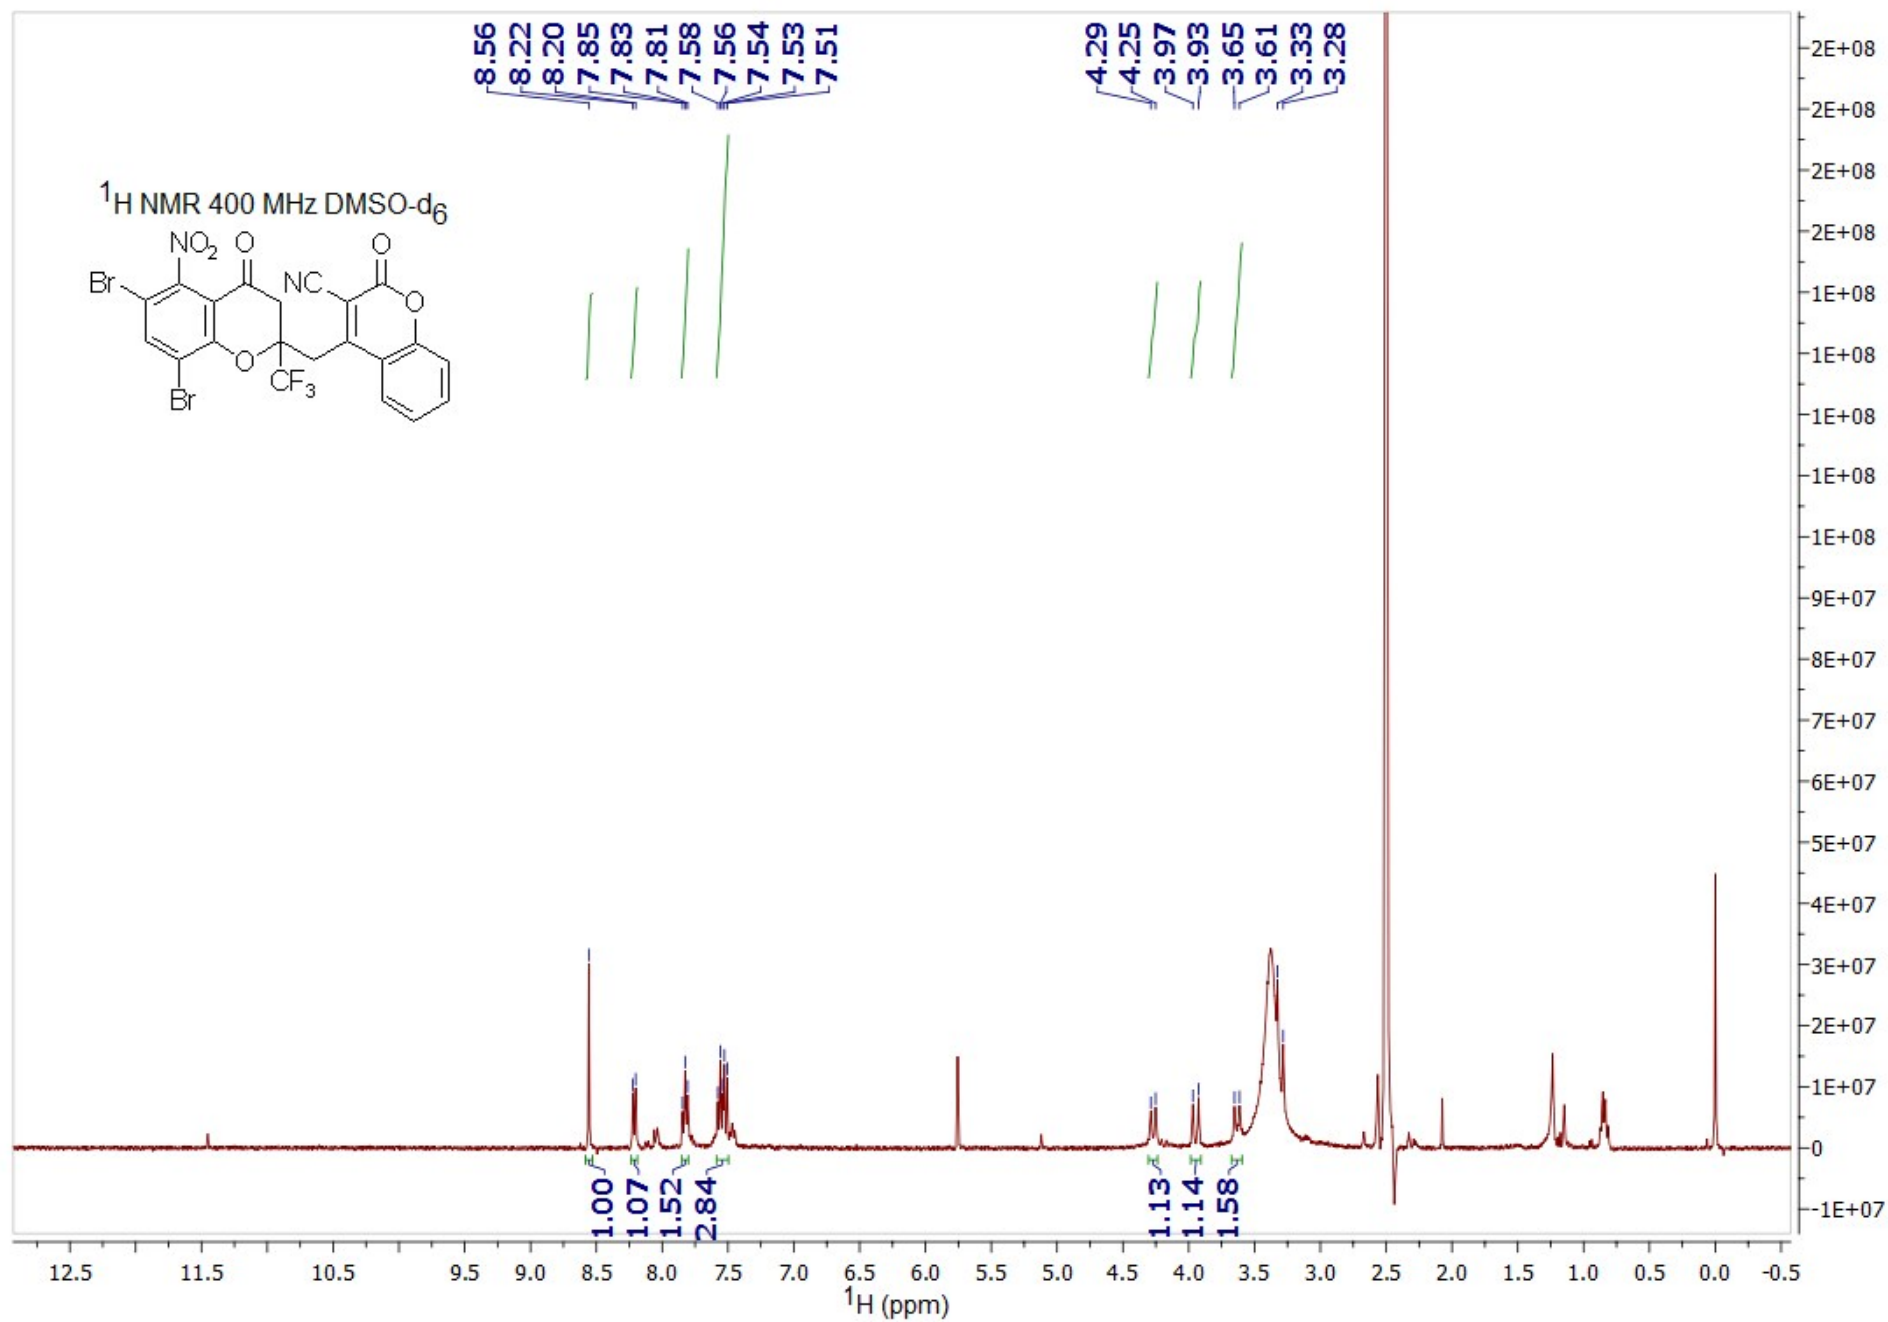

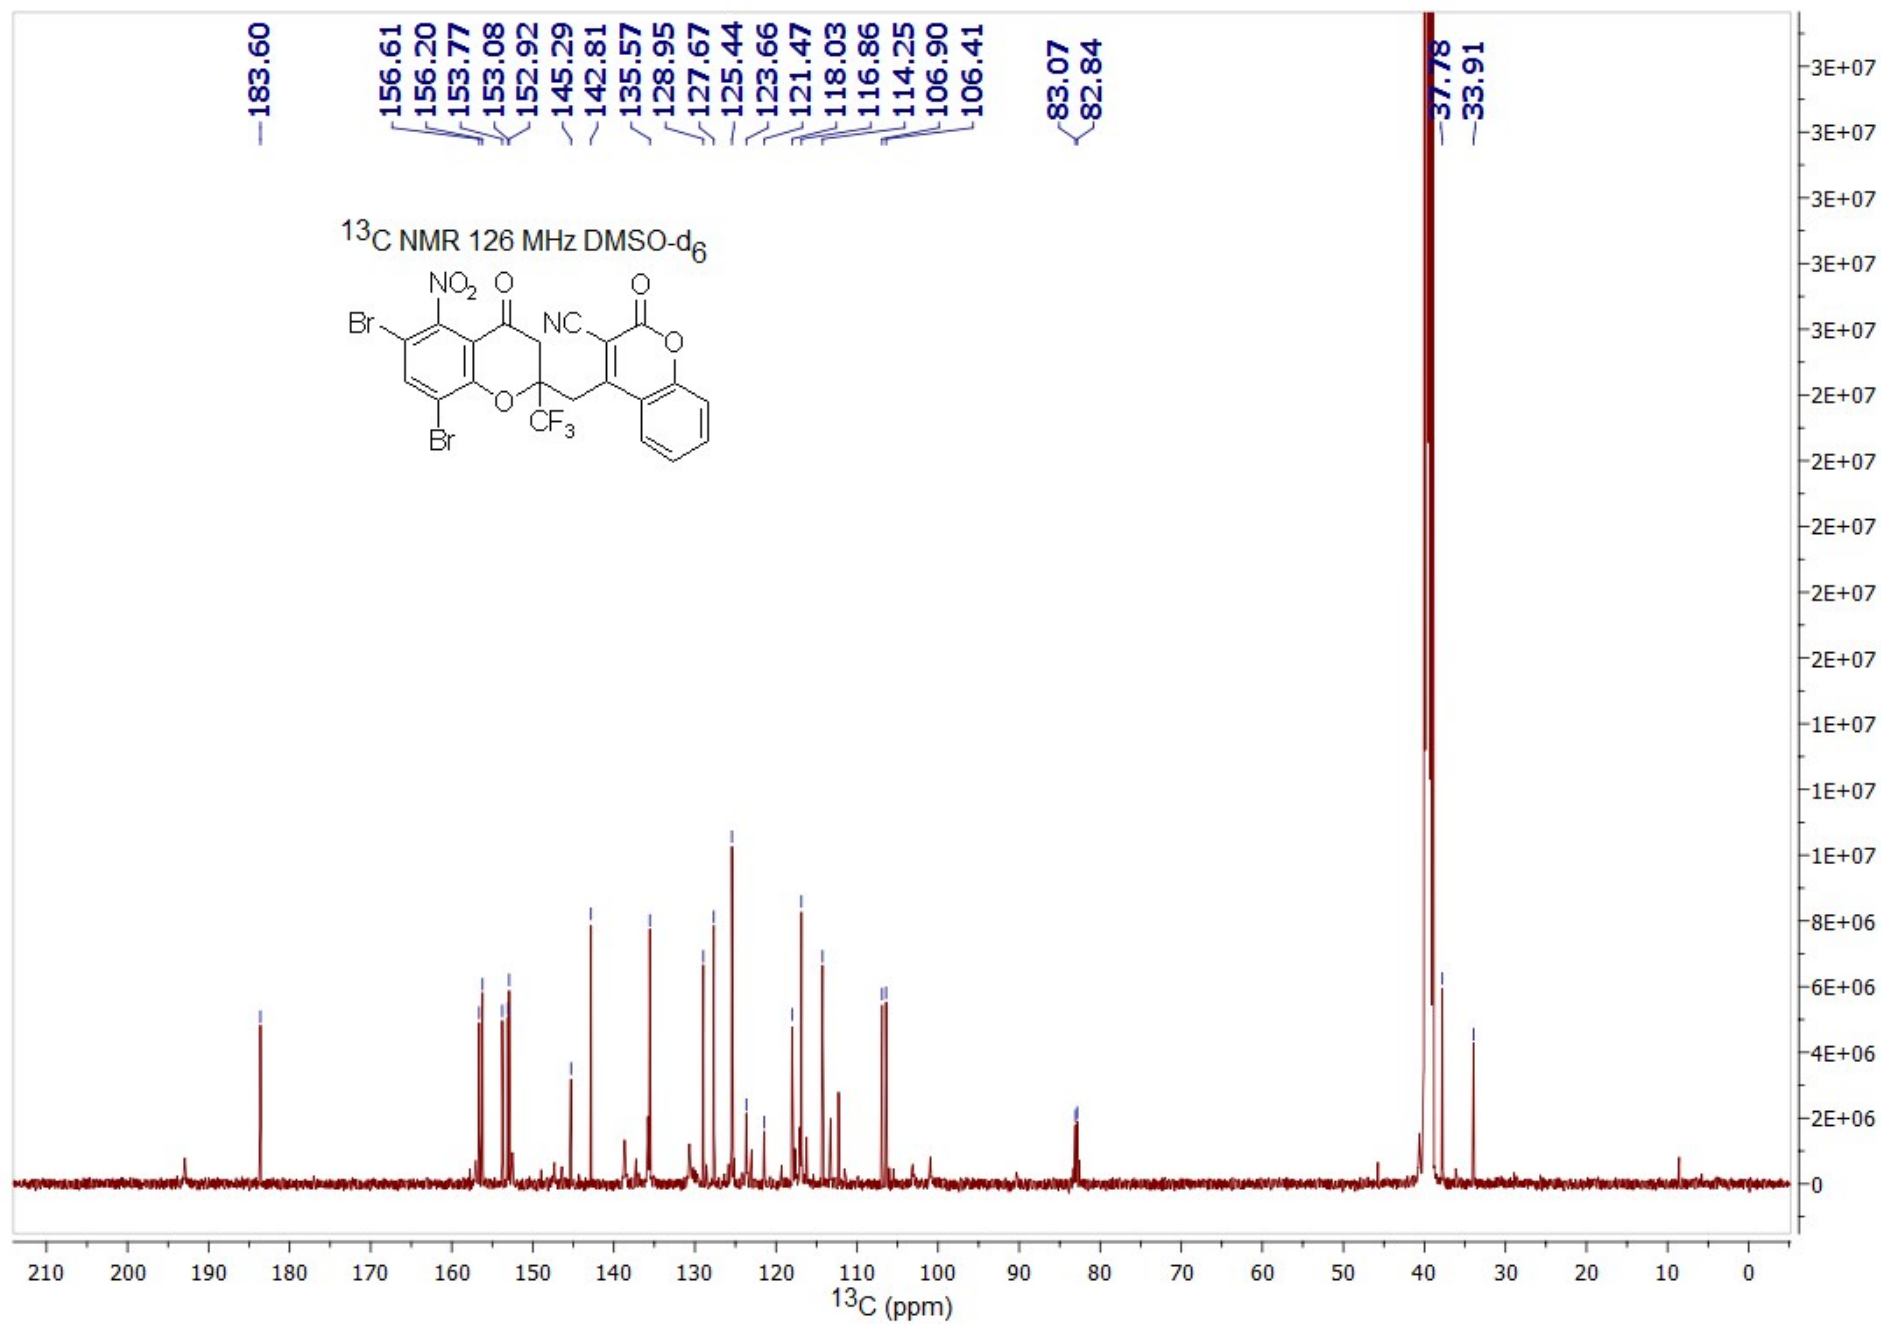

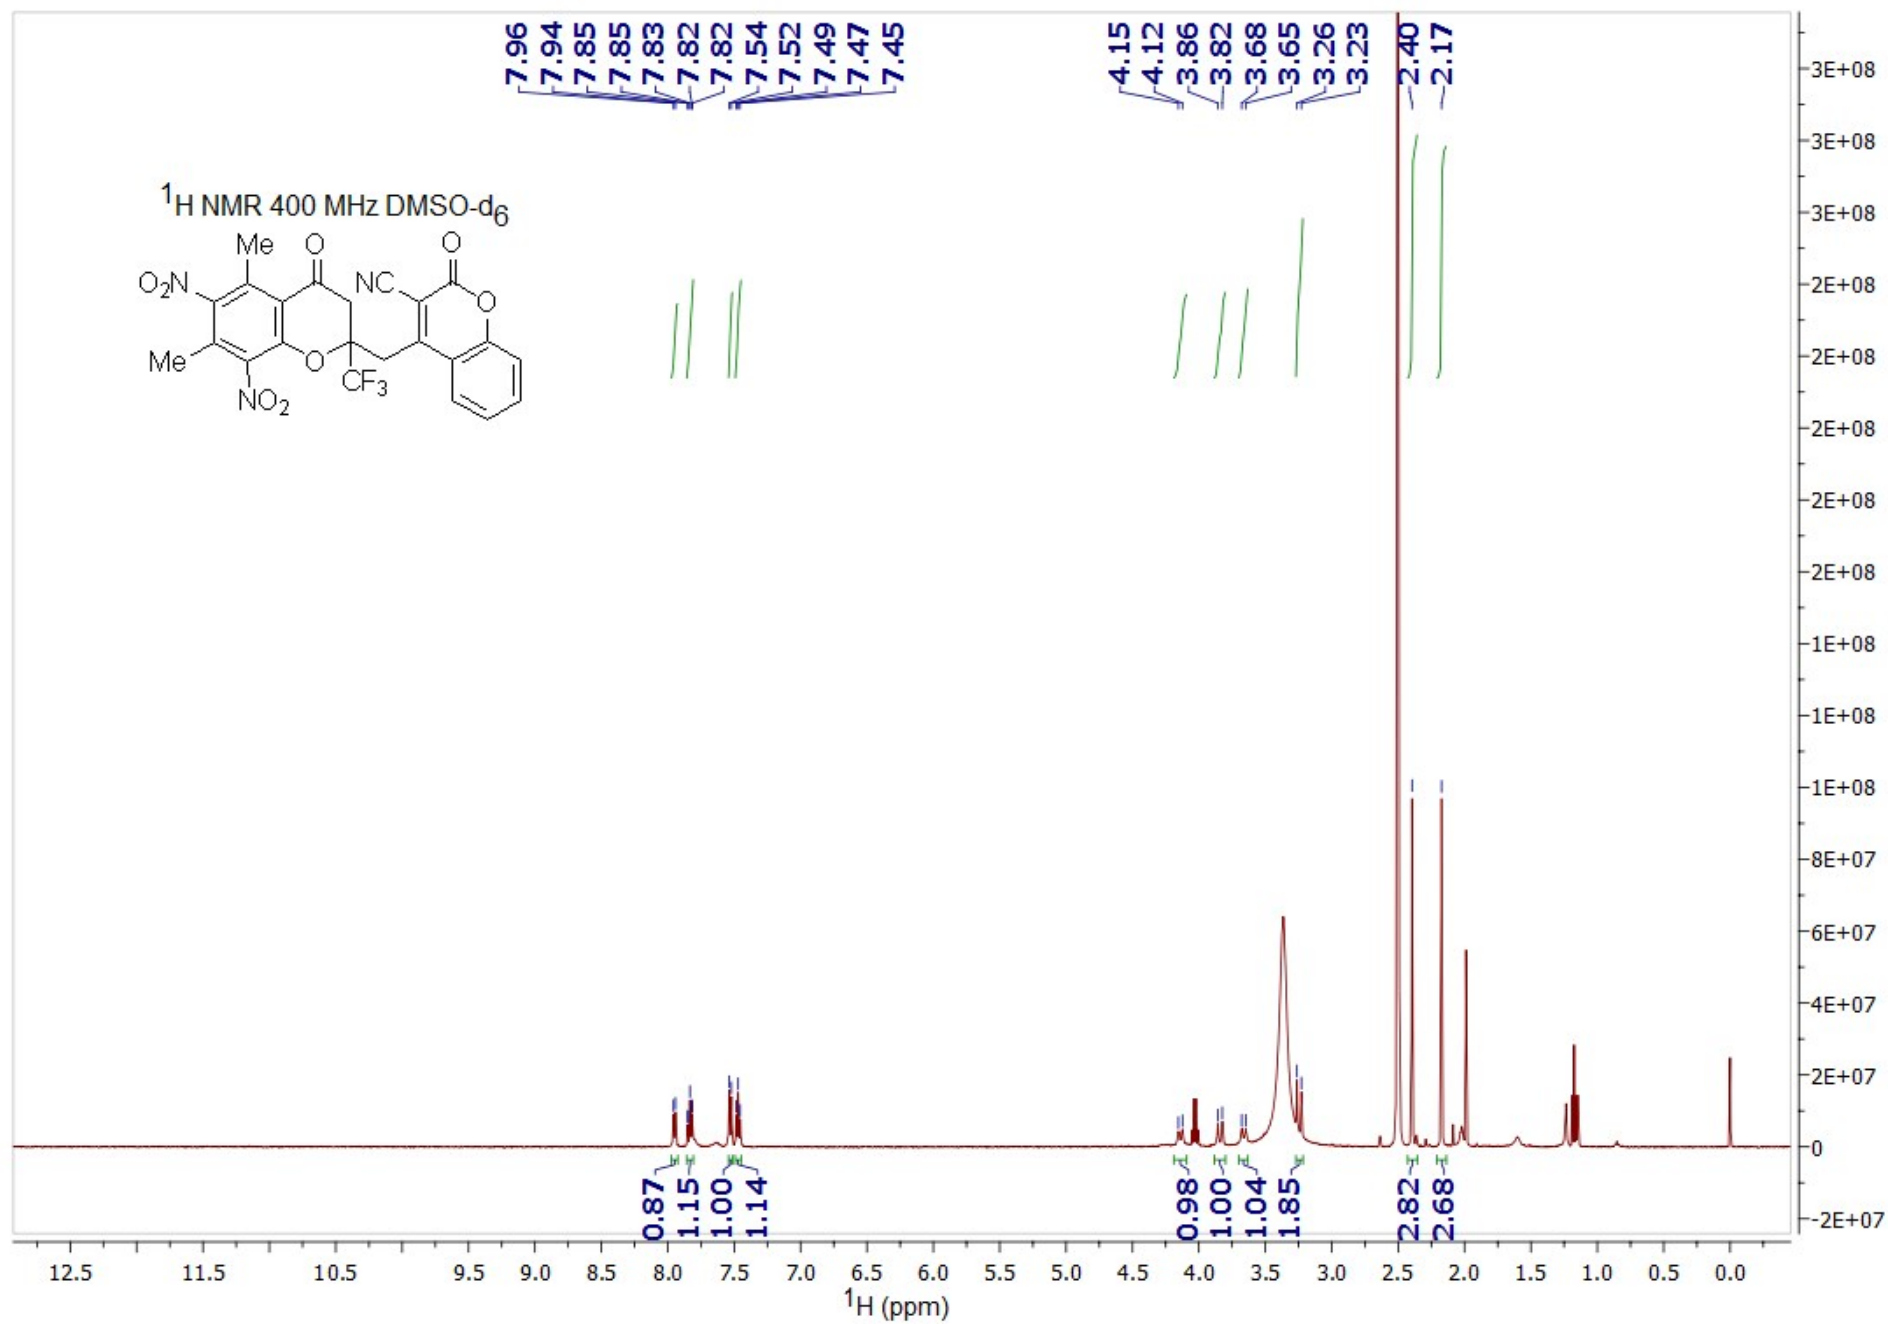

Supplement: c6ra12492e1.pdf [file c6ra12492e1.pdf]
